# Supplementary material
Source: publisher figshare collection journal article supplement (https://acs.figshare.com/ndownloader/files/3808180)

*Supporting Information for*

**Asymmetric Dearomatization of Naphthols *via* a Rh-Catalyzed  
C(*sp*<sup>2</sup>)-H Functionalization/Annulation Reaction**

Jun Zheng, Shao-Bo Wang, Chao Zheng, and Shu-Li You\*

State Key Laboratory of Organometallic Chemistry  
Shanghai Institute of Organic Chemistry, Chinese Academy of Sciences  
345 Lingling Lu, Shanghai 200032, China

E-mail: [slyou@sioc.ac.cn](mailto:slyou@sioc.ac.cn)

**Table of Contents**

|                                                |           |
|------------------------------------------------|-----------|
| General methods                                | S2        |
| Experimental details and characterization data | S3-S32    |
| X-Ray crystal structure of <b>3aa</b>          | S33-S34   |
| Copies of NMR spectra and HPLC chromatographs  | S35-S172  |
| Copies of HSQC, COSY, 1D-NOESY of <b>5bb</b>   | S173-S175 |

**General Methods.** Unless stated otherwise, all reactions were carried out in flame-dried glassware under a dry argon atmosphere. All solvents were purified and dried according to standard methods prior to use.

$^1\text{H}$  and  $^{13}\text{C}$  NMR spectra were recorded on a Varian instrument (400 MHz and 100 MHz, respectively) or an Agilent instrument (400, 600 MHz and 100, 151 MHz, respectively) and internally referenced to tetramethylsilane signal or residual protio solvent signals.  $^{19}\text{F}$  NMR spectra were recorded on a Varian instrument or Agilent instrument (376 MHz) and internally referenced to  $\text{CFCl}_3$ . Data for  $^1\text{H}$  NMR are recorded as follows: chemical shift ( $\delta$ , ppm), multiplicity (s = singlet, d = doublet, t = triplet, m = multiplet or unresolved, br = broad singlet, coupling constant (s) in Hz, integration). Data for  $^{13}\text{C}$  NMR and  $^{19}\text{F}$  NMR are reported in terms of chemical shift ( $\delta$ , ppm).

Chiral rhodium catalysts **K1-K4**<sup>1</sup>, substituted naphthol derivatives **1e**<sup>2</sup> and substituted alkynes **2c**<sup>3</sup>, **2e-2i**<sup>4</sup> were prepared according to published procedures.

## Synthesis and Characterization of Starting Materials

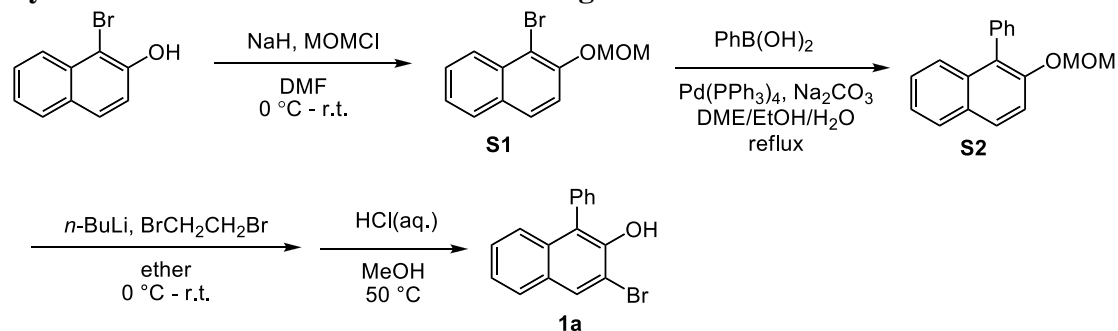

A flame-dried reaction flask was cooled to room temperature and filled with argon. To the flask were added NaH (1.6 g, 1.8 equiv.) and DMF (150 mL). The resulting reaction mixture was stirred at 0 °C. To the flask was added 1-bromo-2-naphthol (5.0 g, 22.4 mmol) slowly. After the reaction mixture was reacted at this temperature for 30 minutes, chloromethyl methyl ether (1.7 mL, 1.1 equiv.) was slowly added. After stirring overnight at room temperature, the reaction was quenched by water. The mixture was extracted with EtOAc, washed with water and brine, dried over Na<sub>2</sub>SO<sub>4</sub>, and concentrated under reduced pressure to give a crude product **S1** (5.98 g, 99% yield) for further use. <sup>1</sup>H NMR (400 MHz, CDCl<sub>3</sub>) δ 8.23 (dd, *J* = 8.8, 0.8 Hz, 1H), 7.80-7.74 (m, 2H), 7.55 (ddd, *J* = 8.4, 7.2, 1.2 Hz, 1H), 7.42-7.38 (M, 2H), 5.34 (s, 2H), 3.56 (s, 3H). Spectral data were in agreement with those reported in the literature.<sup>5</sup>

**S1**, Pd(PPh<sub>3</sub>)<sub>4</sub> (3 mol%, 780 mg), Na<sub>2</sub>CO<sub>3</sub> (11.2 g), PhB(OH)<sub>2</sub> (4.1 g, 1.5 equiv.) were dissolved in DME/EtOH/H<sub>2</sub>O (4/1/1, 60 mL) under argon atmosphere and this reaction mixture was heated to reflux. After stirring for overnight, the reaction mixture was cooled to rt and extracted with EtOAc, washed with brine, dried over Na<sub>2</sub>SO<sub>4</sub>, concentrated under reduced pressure, and filtered through short column chromatography (*n*-hexane/EtOAc/CH<sub>2</sub>Cl<sub>2</sub> = 10/1/1). The filtrate was concentrated and the residue **S2** was used for the next step without further purification.

The crude **S2** (1.32 g, 5.0 mmol) was dissolved in ether (60 mL) under argon atmosphere and cooled to 0 °C. *n*-BuLi (4.2 mL, 2.4 M in *n*-hexane, 2 equiv.) was slowly added and warmed to room temperature. After stirring for 2 h, 1,2-dibromoethane (1.7 mL, 4 equiv.) was slowly added. After stirring for another 1 h,

the reaction was quenched with saturated  $\text{NH}_4\text{Cl}$  aqueous solution. The aqueous layer was extracted with EtOAc and the combined organic layers were washed with brine, dried over  $\text{Na}_2\text{SO}_4$  and concentrated under reduced pressure to give a crude product for further use. The residue was dissolved in MeOH (20 mL) and conc. HCl (aq.) (35%, 0.2 mL) was added at 50 °C. After stirring for 1 h, the reaction mixture was extracted with EtOAc. The combined organic layers were washed with brine, dried over  $\text{Na}_2\text{SO}_4$ , and concentrated under reduced pressure. The residue was purified by column chromatography (petroleum/ $\text{CH}_2\text{Cl}_2$  = 10:1) and recrystallized from hexane/DCM to afford **1a** (441.4 mg, 29% yield, from **S2**). **1a**: White solid, m.p. = 113-114 °C.  $^1\text{H}$  NMR (400 MHz,  $\text{CDCl}_3$ )  $\delta$  8.08 (s, 1H), 7.73-7.70 (m, 1H), 7.58-7.54 (m, 2H), 7.51-7.47 (m, 1H), 7.42-7.30 (m, 5H), 5.54 (s, 1H);  $^{13}\text{C}$  NMR (100 MHz,  $\text{CDCl}_3$ )  $\delta$  146.4, 134.4, 132.7, 131.3, 130.8, 129.4, 129.2, 128.4, 127.0, 126.7, 125.0, 124.3, 122.8, 111.9; IR (thin film):  $\nu_{\text{max}}(\text{cm}^{-1})$  = 2987, 2901, 1376, 1066, 749; Anal. calcd for  $\text{C}_{16}\text{H}_{11}\text{BrO}$ : C, 64.24; H, 3.71; Found: C, 64.30; H, 3.73.

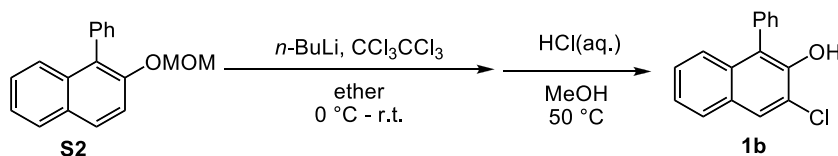

**1b** was prepared from **S2** by the same procedure as the synthesis of **1a**, except that hexachloroethane was used instead of 1,2-dibromoethane. **1b**: (0.7 g, 55% yield, from **S2**), colorless solid, m.p. = 117-118 °C;  $^1\text{H}$  NMR (400 MHz,  $\text{CDCl}_3$ )  $\delta$  7.89 (s, 1H), 7.72-7.70 (m, 1H), 7.57-7.53 (m, 2H), 7.50-7.46 (m, 1H), 7.41-7.38 (m, 3H), 7.35-7.30 (m, 2H), 5.56 (s, 1H);  $^{13}\text{C}$  NMR (100 MHz,  $\text{CDCl}_3$ )  $\delta$  145.8, 134.3, 132.2, 130.8, 129.1, 128.8, 128.3, 127.7, 127.1, 126.6, 125.0, 124.3, 123.1, 121.9; IR (thin film):  $\nu_{\text{max}}(\text{cm}^{-1})$  = 3517, 3472, 3057, 1504, 1454, 1380, 1150, 776; HRMS (EI) calcd for  $\text{C}_{16}\text{H}_{11}\text{ClO}$   $[\text{M}]^+$ : 254.0498; Found: 254.0502.

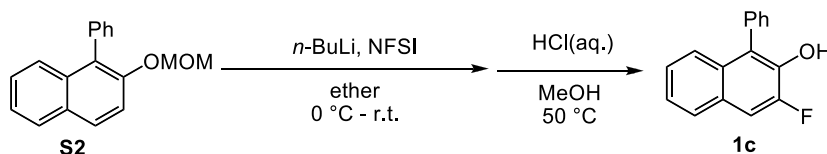



**1c** was prepared from **S2** by the same procedure as the synthesis of **1a**, except that NFSI was used instead of 1,2-dibromoethane. **1c**: (0.8 g, 67% yield, from **S2**), pale yellow solid, m.p. = 79-80 °C;  $^1\text{H}$  NMR (400 MHz,  $\text{CDCl}_3$ )  $\delta$  7.75 (d,  $J$  = 8.0 Hz, 1H), 7.60-7.49 (m, 4H), 7.44-7.42 (m, 3H), 7.39-7.30 (m, 2H), 5.243-5.237 (m, 1H);  $^{13}\text{C}$  NMR (100 MHz,  $\text{CDCl}_3$ )  $\delta$  151.0 (d,  $J$  = 244.3 Hz), 140.4 (d,  $J$  = 15.4 Hz), 133.7 (d,  $J$  = 3.0 Hz), 130.8, 130.1, 129.2, 128.5, 128.3 (d,  $J$  = 8.6 Hz), 127.4 (d,  $J$  = 5.3 Hz), 125.7 (d,  $J$  = 2.6 Hz), 124.9 (d,  $J$  = 2.0 Hz), 124.5, 124.2 (d,  $J$  = 2.2 Hz), 111.6 (d,  $J$  = 17.4 Hz);  $^{19}\text{F}$  NMR (376 Hz,  $\text{CDCl}_3$ )  $\delta$  -135.8 (m); IR (thin film):  $\nu_{\text{max}}(\text{cm}^{-1})$  = 3674, 3504, 3057, 2987, 2901, 1592, 1509, 1465, 777; HRMS (EI) calcd for  $\text{C}_{16}\text{H}_{11}\text{FO}$   $[\text{M}]^+$ : 238.0794; Found: 238.0790.

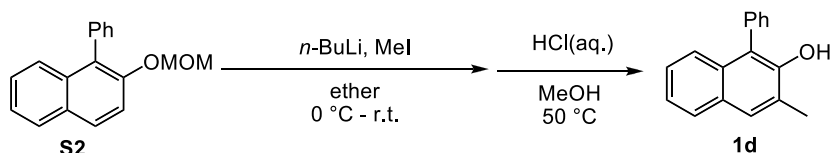

**1d** was prepared from **S2** by the same procedure as the synthesis of **1a**, except that iodomethane was used instead of 1,2-dibromoethane. **1d**: (0.81 g, 69% yield, from **S2**), White solid, m.p. = 96-98 °C;  $^1\text{H}$  NMR (400 MHz,  $\text{CDCl}_3$ )  $\delta$  7.74-7.72 (m, 1H), 7.63 (s, 1H), 7.59-7.55 (m, 2H), 7.51-7.47 (m, 1H), 7.42-7.40 (m, 2H), 7.33-7.24 (m, 3H), 5.19 (s, 1H), 2.46 (s, 3H);  $^{13}\text{C}$  NMR (100 MHz,  $\text{CDCl}_3$ )  $\delta$  149.4, 134.4, 132.0, 131.2, 129.6, 128.9, 128.8, 128.4, 127.2, 126.5, 125.4, 124.4, 123.2, 120.4, 17.0; IR (thin film):  $\nu_{\text{max}}(\text{cm}^{-1})$  = 3674, 3514, 2973, 2901, 1428, 1210, 1126, 748; HRMS (EI) calcd for  $\text{C}_{17}\text{H}_{14}\text{O}$   $[\text{M}]^+$ : 234.1045; Found: 234.1039.

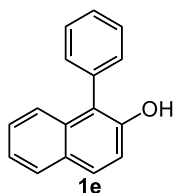

**1e**<sup>2</sup>. Colorless solid, 91% yield.  $^1\text{H}$  NMR (400 MHz,  $\text{CDCl}_3$ )  $\delta$  7.81-7.78 (m, 2H), 7.59-7.55 (m, 2H), 7.53-7.36 (m, 4H), 7.36-7.28 (m, 2H), 7.26-7.22 (m, 1H), 5.14 (s, 1H).

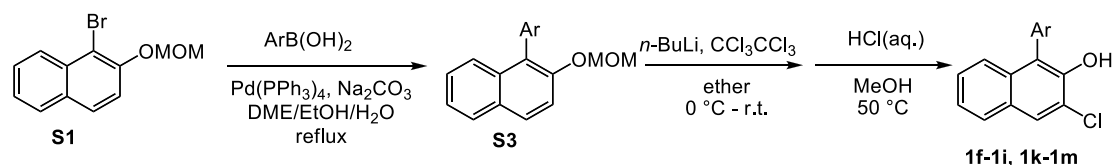

**S1** (8 mmol, 2.1 g), Pd(PPh<sub>3</sub>)<sub>4</sub> (184.8 mg, 0.16 mmol, 2 mol%), Na<sub>2</sub>CO<sub>3</sub> (3.4 g, 32 mmol, 4 equiv.), and ArB(OH)<sub>2</sub> (12 mmol, 1.5 equiv.) were dissolved in DME/EtOH/H<sub>2</sub>O (5/1/1, 70 mL) under argon atmosphere and this mixture was heated to reflux. After stirring for overnight, the reaction mixture was cooled to rt and extracted with EtOAc, washed with brine, dried over Na<sub>2</sub>SO<sub>4</sub>, concentrated under reduced pressure, and filtered through short column chromatography (*n*-hexane/EtOAc/CH<sub>2</sub>Cl<sub>2</sub> = 10/1/1). The filtrate was concentrated and the residue **S3** was used for next step without further purification.

**1f-1i, 1k-1m** was prepared from **S3** in the same procedure as **1b**.

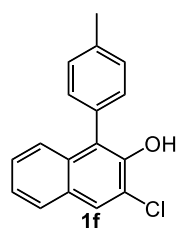

**1f**: (1.13 g, 53% yield, from **S1**), colorless solid, m.p. = 96-98 °C; <sup>1</sup>H NMR (400 MHz, CDCl<sub>3</sub>) δ 7.88 (s, 1H), 7.76-7.66 (m, 1H), 7.44-7.25 (m, 7H), 5.56 (s, 1H), 2.46 (s, 3H); <sup>13</sup>C NMR (100 MHz, CDCl<sub>3</sub>) δ 145.9, 138.2, 132.3, 131.1, 130.6, 129.9, 128.8, 127.6, 127.1, 126.5, 125.0, 124.3, 123.1, 121.9, 21.3; IR (thin film): ν<sub>max</sub>(cm<sup>-1</sup>) = 3519, 3474, 3058, 2918, 2856, 1618, 1584, 1514, 1451, 1376, 749; HRMS (EI) calcd for C<sub>17</sub>H<sub>13</sub>ClO [M]<sup>+</sup>: 268.0655; Found: 268.0658.

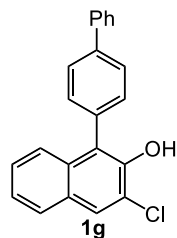

**1g**: (1.3 g, 49% yield, from **S1**), colorless solid, m.p. = 170-171 °C; <sup>1</sup>H NMR (400 MHz, CDCl<sub>3</sub>) δ 7.91 (s, 1H), 7.81-7.75 (m, 2H), 7.75-7.71 (m, 1H), 7.70-7.69 (m, 2H), 7.53-7.44 (m, 5H), 7.41-7.32 (m, 3H), 5.62 (s, 1H); <sup>13</sup>C NMR (100 MHz, CDCl<sub>3</sub>) δ 145.9, 141.1, 140.5, 133.3, 132.3, 131.2, 128.9, 128.8, 127.78, 127.77, 127.5, 127.1,

126.7, 125.0, 124.4, 122.8, 121.9; IR (thin film):  $\nu_{\max}(\text{cm}^{-1}) = 3502, 3073, 3027, 2987, 1927, 1584, 1502, 763$ ; HRMS (EI) calcd for  $\text{C}_{22}\text{H}_{15}\text{ClO}$   $[\text{M}]^+$ : 330.0811; Found: 330.0812.

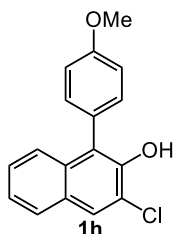

**1h**: (1.5 g, 65% yield, from **S1**), white solid, m.p. = 122-123 °C;  $^1\text{H}$  NMR (400 MHz,  $\text{CDCl}_3$ )  $\delta$  7.88 (s, 1H), 7.74-7.67 (m, 1H), 7.46-7.39 (m, 1H), 7.34-7.30 (m, 4H), 7.09-7.07 (m, 2H), 5.59 (s, 1H), 3.88 (s, 3H);  $^{13}\text{C}$  NMR (100 MHz,  $\text{CDCl}_3$ )  $\delta$  159.5, 146.1, 132.5, 131.9, 128.8, 127.6, 127.1, 126.5, 126.0, 125.0, 124.2, 122.8, 121.9, 114.6, 55.3; IR (thin film):  $\nu_{\max}(\text{cm}^{-1}) = 3674, 3503, 3476, 2987, 2901, 2834, 1604, 1511, 1454, 1382, 1036, 752$ ; HRMS (EI) calcd for  $\text{C}_{17}\text{H}_{13}\text{ClO}_2$   $[\text{M}]^+$ : 284.0604; Found: 284.0599.

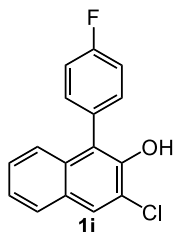

**1i**: (0.54 g, 25% yield, from **S1**), white solid, m.p. = 116-118 °C;  $^1\text{H}$  NMR (400 MHz,  $\text{CDCl}_3$ )  $\delta$  7.90 (s, 1H), 7.75-7.68 (m, 1H), 7.42-7.31 (m, 5H), 7.26-7.22 (m, 2H), 5.58 (s, 1H);  $^{13}\text{C}$  NMR (100 MHz,  $\text{CDCl}_3$ )  $\delta$  162.6 (d,  $J = 246.3$  Hz), 145.9, 132.5 (d,  $J = 8.0$  Hz), 132.4, 128.8, 127.8, 127.2, 126.8, 126.6, 124.8, 124.4, 122.1, 121.8, 116.0 (d,  $J = 21.3$  Hz);  $^{19}\text{F}$  NMR (376 Hz,  $\text{CDCl}_3$ )  $\delta$  -113.5 (m); IR (thin film):  $\nu_{\max}(\text{cm}^{-1}) = 3502, 2987, 1600, 1509, 1455, 1371, 747.8$ ; HRMS (EI) calcd for  $\text{C}_{16}\text{H}_{10}\text{ClFO}$   $[\text{M}]^+$ : 272.0404; Found: 272.0408.

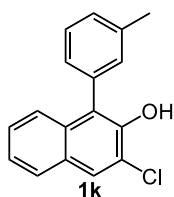

**1k**: (1.55 g, 72% yield, from **S1**), red oil;  $^1\text{H}$  NMR (400 MHz,  $\text{CDCl}_3$ )  $\delta$  7.88 (s, 1H), 7.74-7.67 (m, 1H), 7.48-7.36 (m, 2H), 7.36-7.27 (m, 3H), 7.23-7.15 (m, 2H), 5.56 (s, 1H), 2.42 (s, 3H);  $^{13}\text{C}$  NMR (100 MHz,  $\text{CDCl}_3$ )  $\delta$  145.8, 138.9, 134.1, 132.2, 131.3, 129.2, 129.1, 128.8, 127.72, 127.71, 127.0, 126.5, 125.0, 124.3, 123.2, 121.9, 21.5; IR (thin film):  $\nu_{\text{max}}(\text{cm}^{-1}) = 3518, 3055, 3017, 2980, 1727, 1586, 1380, 1194, 747$ ; HRMS (EI) calcd for  $\text{C}_{17}\text{H}_{13}\text{ClO}$   $[\text{M}]^+$ : 268.0655; Found: 268.0652.

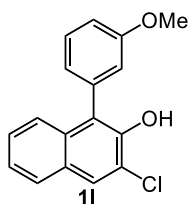

**1l**: (1.4 g, 49% yield, from **S1**), white solid, m.p. = 90-91 °C;  $^1\text{H}$  NMR (400 MHz,  $\text{CDCl}_3$ )  $\delta$  7.90 (s, 1H), 7.72 (s, 1H), 7.58-7.27 (m, 4H), 7.04-6.94 (m, 3H), 5.62 (s, 1H), 3.82 (s, 3H);  $^{13}\text{C}$  NMR (100 MHz,  $\text{CDCl}_3$ )  $\delta$  160.1, 145.8, 135.5, 132.1, 130.3, 128.7, 127.9, 127.1, 126.6, 125.0, 124.3, 122.9, 121.9, 116.0, 114.2, 55.3; IR (thin film):  $\nu_{\text{max}}(\text{cm}^{-1}) = 3380, 2987, 2945, 2901, 1585, 1451, 1383, 1081, 751$ ; HRMS (EI) calcd for  $\text{C}_{17}\text{H}_{13}\text{ClO}_2$   $[\text{M}]^+$ : 284.0604; Found: 284.0598.

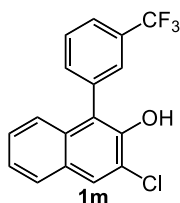

**1m**: (1.4 g, 49% yield, from **S1**), yellow solid, m.p. = 75-76 °C;  $^1\text{H}$  NMR (400 MHz,  $\text{CDCl}_3$ )  $\delta$  7.95 (s, 1H), 7.78-7.72 (m, 2H), 7.70-7.66 (m, 2H), 7.61 (d,  $J = 7.6$  Hz, 1H), 7.40-7.38 (m, 3H), 5.65 (s, 1H);  $^{13}\text{C}$  NMR (100 MHz,  $\text{CDCl}_3$ )  $\delta$  145.8, 135.8, 134.3, 132.2, 131.2 (q,  $J = 32.3$  Hz), 129.2, 128.8, 128.0, 127.7 (q,  $J = 3.7$  Hz), 127.3, 127.1, 124.8 (q,  $J = 3.7$  Hz), 124.62, 124.56, 124.1 (q,  $J = 271.0$  Hz), 121.8, 121.7;  $^{19}\text{F}$  NMR (376 Hz,  $\text{CDCl}_3$ )  $\delta$  -62.5; IR (thin film):  $\nu_{\text{max}}(\text{cm}^{-1}) = 3529, 2987, 2901, 1591, 1504, 1458, 1324, 1070$ ; HRMS (EI) calcd for  $\text{C}_{17}\text{H}_{10}\text{ClF}_3\text{O}$   $[\text{M}]^+$ : 322.0372; Found: 322.0371.

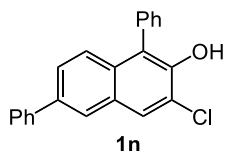

**1n:** (0.5 g, 30% yield), white solid, m.p. = 108-109 °C;  $^1\text{H}$  NMR (400 MHz,  $\text{CDCl}_3$ )  $\delta$  7.94 (d,  $J$  = 13.6 Hz, 2H), 7.68-7.33 (m, 12H), 5.58 (s, 1H);  $^{13}\text{C}$  NMR (100 MHz,  $\text{CDCl}_3$ )  $\delta$  145.9, 140.6, 137.1, 134.3, 131.4, 130.8, 129.2, 129.1, 128.9, 128.4, 128.0, 127.4, 127.2, 126.3, 125.6, 124.9, 123.1, 122.4; IR (thin film):  $\nu_{\text{max}}(\text{cm}^{-1})$  = 3510, 2969, 2923, 2901, 1590, 1487, 1434, 1257, 752; HRMS (EI) calcd for  $\text{C}_{22}\text{H}_{15}\text{ClO}$   $[\text{M}]^+$ : 330.0811; Found: 330.0809.

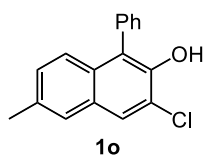

**1o:** (0.48 g, 27% yield), colorless oil;  $^1\text{H}$  NMR (400 MHz,  $\text{CDCl}_3$ )  $\delta$  7.77 (s, 1H), 7.55-7.51 (m, 2H), 7.48-7.45 (m, 2H), 7.38-7.36 (m, 2H), 7.29 (d,  $J$  = 8.8 Hz, 1H), 7.15 (d,  $J$  = 8.4 Hz, 1H), 5.30 (s, 1H), 2.43 (s, 3H);  $^{13}\text{C}$  NMR (100 MHz,  $\text{CDCl}_3$ )  $\delta$  145.2, 134.5, 133.9, 130.7, 130.4, 129.02, 128.98, 128.9, 128.2, 127.0, 126.0, 124.8, 123.0, 121.9, 21.3; IR (thin film):  $\nu_{\text{max}}(\text{cm}^{-1})$  = 3523, 2920, 1590, 1492, 1454, 1259, 1151, 700; HRMS (EI) calcd for  $\text{C}_{17}\text{H}_{13}\text{ClO}$   $[\text{M}]^+$ : 268.0655; Found: 268.0654.

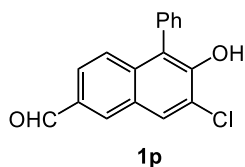

**1p:** (0.22 g, 38% yield), red solid, m.p. = 150-152 °C;  $^1\text{H}$  NMR (400 MHz,  $\text{CDCl}_3$ )  $\delta$  10.05 (s, 1H), 8.20 (s, 1H), 8.04 (s, 1H), 7.78 (d,  $J$  = 8.8 Hz, 1H), 7.69-7.44 (m, 4H), 7.42-7.33 (m, 2H), 6.03 (s, 1H);  $^{13}\text{C}$  NMR (100 MHz,  $\text{CDCl}_3$ )  $\delta$  191.7, 148.7, 135.4, 133.4, 132.6, 130.6, 129.4, 129.3, 128.7, 127.8, 126.0, 123.7, 123.6, 123.3; IR (thin film):  $\nu_{\text{max}}(\text{cm}^{-1})$  = 3349, 3059, 2851, 1684, 1606, 1458, 1144, 693; HRMS (EI) calcd for  $\text{C}_{17}\text{H}_{11}\text{ClO}_2$   $[\text{M}]^+$ : 282.0448; Found: 282.0452.

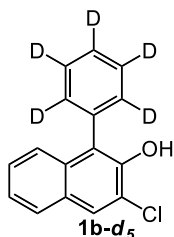

**1b-d<sub>5</sub>**: (0.66 g, 51% yield, from **S1**), pale brown solid, m.p. = 114-115 °C; <sup>1</sup>H NMR (400 MHz, CDCl<sub>3</sub>) δ 7.87 (s, 1H), 7.74-7.65 (m, 1H), 7.42-7.36 (m, 1H), 7.36-7.27 (m, 2H), 5.55 (s, 1H); <sup>13</sup>C NMR (100 MHz, CDCl<sub>3</sub>) δ 145.8, 134.1, 132.2, 130.3 (t, *J* = 24.1 Hz), 128.8, 128.6 (t, *J* = 24.5 Hz), 127.7, 127.1, 126.6, 124.9, 124.3, 123.1, 121.9; IR (thin film): ν<sub>max</sub>(cm<sup>-1</sup>) = 3517, 3470, 3057, 2987, 2901, 1585, 1502, 1199, 752; HRMS (EI) calcd for C<sub>16</sub>H<sub>6</sub>D<sub>5</sub>ClO [M]<sup>+</sup>: 259.0812; Found: 259.0817.

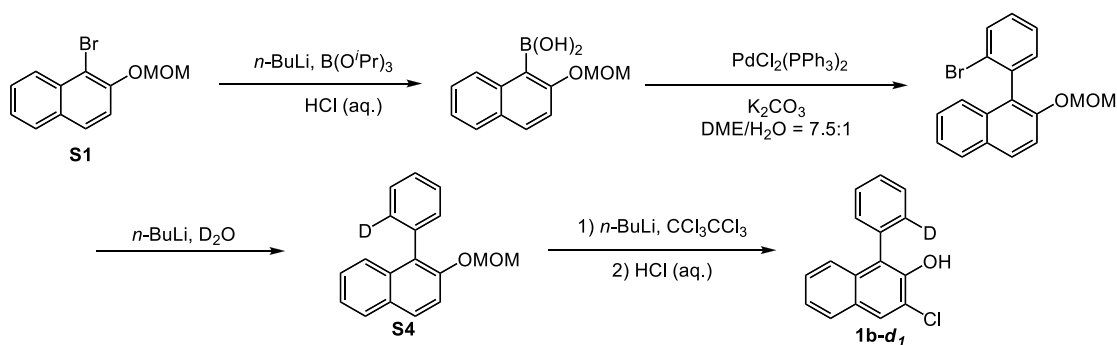

A solution of **S1** (2.7 g, 2.1 mmol) in THF (25 mL) under Ar was treated dropwise at -78 °C with *n*-butyllithium (8.0 mL, 2.5 M in hexane, 20 mmol). The reaction was stirred at -78 °C for 45 min, and then triisopropylborate (4.7 mL, 20 mmol) was added in one portion. The resulting mixture was stirred at -78 °C for 30 min and then at room temperature for 1 h. 5 mL of 10% HCl (aq.) and ether (50 mL) were added and the aqueous layer was extracted with ether. The combined organic extracts were washed with brine and dried over anhydrous MgSO<sub>4</sub>. After concentrating in vacuum, the residue was added to round-bottomed flask, fitted with a condenser. K<sub>2</sub>CO<sub>3</sub> (2.5 g, 18 mmol), 1-bromo-2-iodobenzene (1.68 g, 6 mmol), bis(triphenylphosphine)palladium(II) chloride (420 mg, 0.6 mmol), DME (30 mL) and H<sub>2</sub>O (4 mL) were added, and the resulting mixture was stirred at 80 °C for 9 h. The reaction mixture was allowed to cool to room temperature, DME was evaporated, and water (40.0 mL) and EtOAc (20.0 mL) were added. The layers were separated

and the aqueous layer was extracted. The combined organic extracts were washed with brine and dried over anhydrous  $\text{Na}_2\text{SO}_4$ . After concentrating in vacuum, the residue was added to a round-bottomed flask. THF (20 mL) was added under Ar to the mixture dropwise at  $-78\text{ }^\circ\text{C}$  with *n*-butyllithium (1.4 mL, 2.5 M in hexane, 3.4 mmol). The reaction was stirred at  $-78\text{ }^\circ\text{C}$  for 2 h, and then deuterium oxide (0.5 mL, 3.5 mmol) was added in one portion. The resulting mixture was stirred at room temperature for 5 h. 5 mL of 10% HCl aqueous solution and ether (50 mL) were added and the aqueous layer was extracted with EtOAc. The combined organic extracts were washed with brine and dried over anhydrous  $\text{Na}_2\text{SO}_4$ . After concentrating in vacuum, the residue **S4** was used directly without purification. **1b-d<sub>l</sub>** was prepared from **S4** by the same procedure as the synthesis of **1b**.

**1b-d<sub>l</sub>**: (0.25 g, 12% yield, from **S1**), white solid, m.p. =  $116\text{--}117\text{ }^\circ\text{C}$ ;  $^1\text{H}$  NMR (400 MHz,  $\text{CDCl}_3$ )  $\delta$  7.91 (s, 1H), 7.77–7.70 (m, 1H), 7.61–7.54 (m, 2H), 7.54–7.47 (m, 1H), 7.44–7.30 (m, 4H), 5.56 (s, 1H);  $^{13}\text{C}$  NMR (100 MHz,  $\text{CDCl}_3$ )  $\delta$  145.8, 134.2, 132.2, 130.7, 130.4 (t,  $J = 24.3\text{ Hz}$ ), 129.0, 128.9, 128.7, 128.2, 127.7, 127.0, 126.5, 124.9, 124.2, 123.0, 121.9; IR (thin film):  $\nu_{\text{max}}(\text{cm}^{-1}) = 3517, 3471, 3056, 2987, 2901, 1586, 1502, 1471, 749$ ; HRMS (EI) calcd for  $\text{C}_{16}\text{H}_{10}\text{DClO}$   $[\text{M}]^+$ : 255.0561; Found: 255.0556.

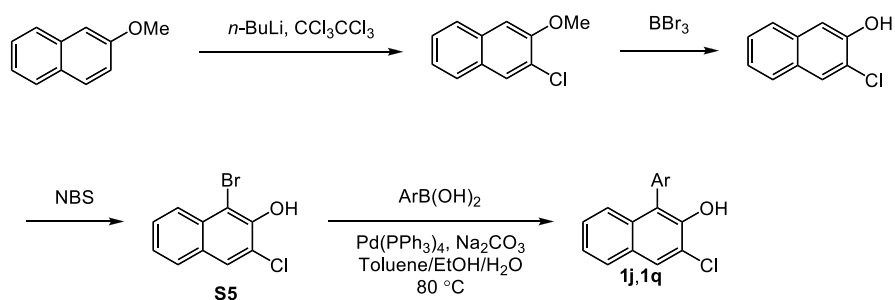

To a solution of 2-methoxynaphthalene (4.75 g, 30 mmol) in THF (50 mL) was added *n*-butyllithium (15 mL, 2.5 M in hexane, 36 mmol) at  $-78\text{ }^\circ\text{C}$ . After the mixture was stirred for 1 h at room temperature, hexachloroethane (8.5 g, 36 mmol) in THF (20 mL) was added to the solution at  $-78\text{ }^\circ\text{C}$ , and the resulting mixture was stirred for 4 h at room temperature. The mixture was poured into a saturated aqueous ammonium chloride solution (10 mL) and was extracted with EtOAc (10 mL  $\times$  3). The combined

organic extracts were washed with brine (20 mL), dried (Na<sub>2</sub>SO<sub>4</sub>), and concentrated in vacuo. The residue was dissolved in dichloromethane (50 mL). To this mixture was added dropwise a dichloromethane solution of BBr<sub>3</sub> (ca. 0.5 M 90 mL, 45 mmol) at –78 °C. After the stirring was maintained for 20 h at room temperature, the mixture was added ice at 0 °C. The aqueous layer was extracted with dichloromethane (20 mL × 3). The combined organic layer was washed with brine (30 mL), dried (Na<sub>2</sub>SO<sub>4</sub>) and concentrated in vacuo. To a solution of this residue in DMF (40 mL) was added NBS (5.6 g, 31.5 mmol). The mixture was stirred at room temperature for 7 h. Water was added, and the mixture was extracted with CH<sub>2</sub>Cl<sub>2</sub> (20 mL × 3). The combined organic layer was washed with water (30 mL × 3), dried (Na<sub>2</sub>SO<sub>4</sub>) and concentrated in vacuo. The residue was chromatographed on a silica gel column using CH<sub>2</sub>Cl<sub>2</sub>/PE 1:10 as eluent. A white solid **S5** was obtained (1.71 g, 22% for three steps); m.p. = 68-69 °C; <sup>1</sup>H NMR (400 MHz, CDCl<sub>3</sub>) δ 7.98 (d, *J* = 8.4 Hz, 1H), 7.77 (s, 1H), 7.62 (d, *J* = 8.4 Hz, 1H), 7.54-7.50 (m, 1H), 7.39-7.35 (m, 1H), 6.14 (s, 1H); <sup>13</sup>C NMR (100 MHz, CDCl<sub>3</sub>) δ 146.6, 131.3, 129.0, 127.98, 127.97, 127.3, 125.7, 125.2, 121.5, 106.8; IR (thin film): ν<sub>max</sub>(cm<sup>-1</sup>) = 3403, 3053, 2961, 1620, 1588, 1462, 1497, 739; HRMS (EI) calcd for C<sub>10</sub>H<sub>6</sub>OClBr [M]<sup>+</sup>: 255.9291; Found: 255.9292.

**S5** (2 mmol), Pd(PPh<sub>3</sub>)<sub>4</sub> (10 mol%, 231 mg), Na<sub>2</sub>CO<sub>3</sub> (445 mg), ArB(OH)<sub>2</sub> (2 equiv.) were dissolved in Toluene/EtOH/H<sub>2</sub>O (5/1/1, 14 mL) under argon atmosphere and this reaction mixture was heated to 80 °C. After stirring for 3 h, the reaction mixture was cooled to rt and extracted with EtOAc, washed with brine, dried over Na<sub>2</sub>SO<sub>4</sub>, concentrated under reduced pressure, and filtered through short column chromatography (*n*-hexane/EtOAc = 10/1).

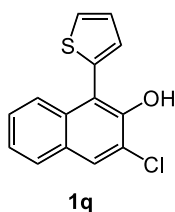

**1q**: (0.48 g, 24% yield), brown solid, m.p. = 63-64 °C; <sup>1</sup>H NMR (400 MHz, CDCl<sub>3</sub>) δ 7.87 (s, 1H), 7.69-7.60 (m, 1H), 7.60-7.49 (m, 2H), 7.41-7.26 (m, 2H), 7.22 (dd, *J* =



5.2, 3.6 Hz, 1H), 7.12 (dd,  $J = 3.2, 0.8$  Hz, 1H), 5.81 (s, 1H);  $^{13}\text{C}$  NMR (100 MHz,  $\text{CDCl}_3$ )  $\delta$  147.4, 133.9, 133.0, 129.6, 129.0, 128.5, 128.0, 127.8, 127.0, 126.95, 124.7, 124.5, 121.7, 115.1; IR (thin film):  $\nu_{\text{max}}(\text{cm}^{-1}) = 3455, 3061, 2923, 2853, 1699, 1587, 1502, 1451, 1191, 727$ ; HRMS (EI) calcd for  $\text{C}_{14}\text{H}_9\text{ClOS}$   $[\text{M}]^+$ : 260.0063; Found: 260.0060.

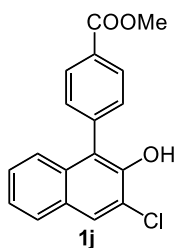

**1j**: (0.28 g, 45% yield), white solid, m.p. = 169-170 °C;  $^1\text{H}$  NMR (400 MHz,  $\text{CDCl}_3$ )  $\delta$  8.23 (d,  $J = 8.0$  Hz, 2H), 7.94 (s, 1H), 7.79-7.72 (m, 1H), 7.51 (d,  $J = 8.0$  Hz, 2H), 7.41-7.35 (m, 3H), 5.63 (s, 1H), 3.98 (s, 3H);  $^{13}\text{C}$  NMR (100 MHz,  $\text{CDCl}_3$ )  $\delta$  166.8, 145.6, 139.9, 131.9, 130.9, 130.0, 129.7, 128.8, 128.0, 127.2, 126.9, 124.7, 124.5, 122.2, 121.9, 52.2; IR (thin film):  $\nu_{\text{max}}(\text{cm}^{-1}) = 3391, 2953, 1702, 1606, 1496, 1401, 765$ ; HRMS (ESI) calcd for  $\text{C}_{18}\text{H}_{14}\text{ClO}_3$   $[\text{M} + \text{H}]^+$ : 313.0626; Found: 313.0624.

## General Procedure for Enantioselective Dearomatization of Naphthols

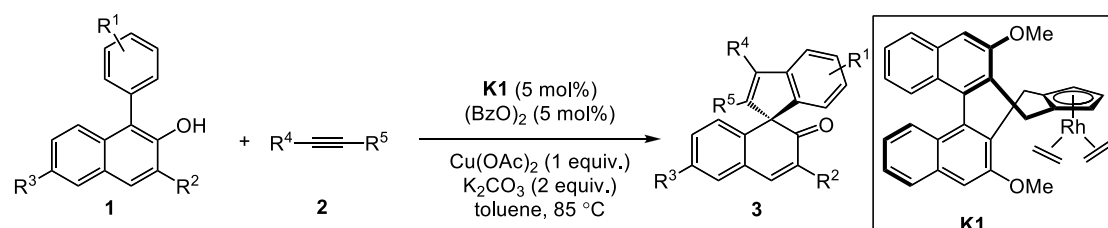

To a Schlenk tube were added **K1** (10  $\mu\text{mol}$ , 5.6 mg),  $(\text{BzO})_2$  (10  $\mu\text{mol}$ , 2.4 mg) and toluene (1 mL) successively. After the mixture was stirred at room temperature for 30 min, **1** (0.2 mmol),  $\text{Cu}(\text{OAc})_2$  (36.4 mg, 0.2 mmol),  $\text{K}_2\text{CO}_3$  (55.2 mg, 0.4 mmol), **2** (0.4 mmol) and toluene (1 mL) were added successively. The mixture was stirred at 85 °C under air (open flask). After the reaction was complete (monitored by TLC), the mixture was concentrated under reduced pressure and the residue was purified by column chromatography (ethyl acetate/petroleum ether = 1/40, v/v) to afford desired product **3**.

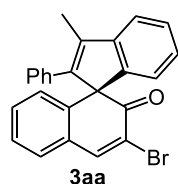

Yellow solid, m.p. = 163-165 °C, 33.6 mg, 81% yield (0.1 mmol scale).  $^1\text{H}$  NMR (400 MHz,  $\text{CDCl}_3$ )  $\delta$  7.99 (s, 1H), 7.39 (d,  $J$  = 4.0 Hz, 1H), 7.36-7.27 (m, 2H), 7.26-7.11 (m, 5H), 7.10-7.02 (m, 1H), 7.01-6.89 (m, 3H), 6.81 (d,  $J$  = 8.0 Hz, 1H), 2.34 (s, 3H);  $^{13}\text{C}$  NMR (100 MHz,  $\text{CDCl}_3$ )  $\delta$  189.9, 147.4, 147.0, 146.2, 144.1, 140.3, 140.0, 134.7, 130.6, 130.3, 129.2, 128.7, 128.2, 128.1, 127.8, 127.2, 127.1, 126.4, 122.5, 121.6, 120.6, 72.8, 12.5; IR (thin film):  $\nu_{\text{max}}(\text{cm}^{-1})$  = 3061, 2921, 1681, 1595, 1337, 1220, 752; HRMS (ESI) calcd for  $\text{C}_{25}\text{H}_{18}\text{BrO}$   $[\text{M} + \text{H}]^+$ : 413.0536; Found: 413.0537; [Phenomenex Lux 5u Cellulose-4 PC-4 (0.46 cm x 25 cm), *n*-hexane/2-propanol = 90/10,  $\nu$  = 1.0 mL  $\cdot$  min $^{-1}$ ,  $\lambda$  = 254 nm,  $t$  (major) = 15.90 min,  $t$  (minor) = 12.05 min], 95:5 e.r.;  $[\alpha]_{\text{D}}^{20}$  = -177.3 ( $c$  = 0.20,  $\text{CHCl}_3$ ).

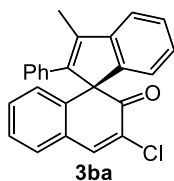

Yellow solid, m.p. = 163-165 °C, 61.2 mg, 83% yield.  $^1\text{H}$  NMR (400 MHz,  $\text{CDCl}_3$ )  $\delta$  7.72 (s, 1H), 7.38 (d,  $J$  = 7.6 Hz, 1H), 7.33-7.23 (m, 2H), 7.22-7.01 (m, 6H), 7.01-6.96 (m, 2H), 6.93 (d,  $J$  = 7.6 Hz, 1H), 6.81 (d,  $J$  = 7.6 Hz, 1H), 2.33 (s, 3H);  $^{13}\text{C}$  NMR (100 MHz,  $\text{CDCl}_3$ )  $\delta$  190.1, 147.1, 146.2, 144.0, 143.3, 140.1, 139.8, 134.6, 130.7, 130.4, 129.6, 129.2, 128.6, 128.2, 128.0, 127.8, 127.2, 127.0, 126.4, 121.5, 120.6, 73.0, 12.2; IR (thin film):  $\nu_{\text{max}}(\text{cm}^{-1})$  = 3674, 2987, 2901, 1668, 1610, 1439, 1406, 1394, 1066; HRMS (ESI) calcd for  $\text{C}_{25}\text{H}_{18}\text{ClO}$   $[\text{M} + \text{H}]^+$ : 369.1041; Found: 369.1042; [Phenomenex Lux 5u Cellulose-4 PC-4 (0.46 cm x 25 cm), *n*-hexane/2-propanol = 90/10,  $\nu$  = 1.0  $\text{mL} \cdot \text{min}^{-1}$ ,  $\lambda$  = 254 nm,  $t$  (major) = 12.58 min,  $t$  (minor) = 15.55 min], 96:4 e.r.;  $[\alpha]_{\text{D}}^{20}$  = -227.5 ( $c$  = 0.20,  $\text{CHCl}_3$ ).

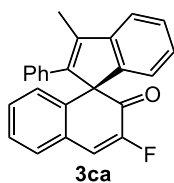

Yellow solid, m.p. = 158-160 °C, 50.9 mg, 72% yield.  $^1\text{H}$  NMR (400 MHz,  $\text{CDCl}_3$ )  $\delta$  7.41 (d,  $J$  = 7.6 Hz, 1H), 7.34-7.28 (m, 2H), 7.2-7.05 (m, 7H), 7.01-6.96 (m, 2H), 6.94 (d,  $J$  = 7.2 Hz, 1H), 6.79 (d,  $J$  = 7.6 Hz, 1H), 2.35 (s, 3H);  $^{13}\text{C}$  NMR (100 MHz,  $\text{CDCl}_3$ )  $\delta$  189.6 (d,  $J$  = 17.2 Hz), 153.0 (d,  $J$  = 266.4 Hz), 147.2, 146.4, 143.8, 140.3, 138.5 (d,  $J$  = 0.9 Hz), 134.6, 129.7 (d,  $J$  = 2.7 Hz), 129.3 (d,  $J$  = 5.9 Hz), 128.7 (d,  $J$  = 6.0 Hz), 128.6, 128.2, 128.1, 127.8, 127.3, 127.1 (d,  $J$  = 1.2 Hz), 126.5, 124.9 (d,  $J$  = 17.3 Hz), 121.5, 120.6, 73.7 (d,  $J$  = 4.0 Hz), 12.2;  $^{19}\text{F}$  NMR (376 Hz,  $\text{CDCl}_3$ )  $\delta$  -130.8 (d,  $J$  = 11.3 Hz); IR (thin film):  $\nu_{\text{max}}(\text{cm}^{-1})$  = 3674, 2987, 2902, 1673, 1406, 1258, 1066; HRMS (ESI) calcd for  $\text{C}_{25}\text{H}_{18}\text{FO}$   $[\text{M} + \text{H}]^+$ : 353.1336; Found: 353.1346; [Phenomenex Lux 5u Cellulose-4 PC-4 (0.46 cm x 25 cm), *n*-hexane/2-propanol = 95/5,  $\nu$  = 1.0  $\text{mL} \cdot \text{min}^{-1}$ ,  $\lambda$  = 254 nm,  $t$  (major) = 20.58 min,  $t$  (minor) = 18.86 min], 86:14 e.r.;  $[\alpha]_{\text{D}}^{20}$  = -87.2 ( $c$  = 0.20,  $\text{CHCl}_3$ ).

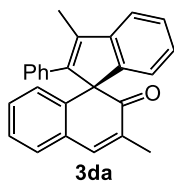

White solid, m.p. = 159-160 °C, 34.6 mg, 50% yield.  $^1\text{H}$  NMR (400 MHz,  $\text{CDCl}_3$ )  $\delta$  7.39-7.37 (m, 2H), 7.31-7.23 (m, 2H), 7.22-7.08 (m, 4H), 7.05-7.00 (m, 4H), 6.91 (d,  $J = 7.6$  Hz, 1H), 6.77 (d,  $J = 7.6$  Hz, 1H), 2.37 (s, 3H), 1.97 (s, 3H);  $^{13}\text{C}$  NMR (100 MHz,  $\text{CDCl}_3$ )  $\delta$  197.4, 147.9, 146.4, 144.5, 142.4, 140.2, 139.5, 135.2, 134.1, 130.5, 129.1, 128.67, 128.65, 128.1, 127.6, 127.3, 126.9, 126.7, 126.1, 121.3, 120.4, 71.8, 16.3, 12.3; IR (thin film):  $\nu_{\text{max}}(\text{cm}^{-1}) = 3674, 2987, 2901, 1655, 1595, 1075, 1051, 696$ ; HRMS (ESI) calcd for  $\text{C}_{26}\text{H}_{21}\text{O}$   $[\text{M} + \text{H}]^+$ : 349.1587; Found: 349.1589; [Phenomenex Lux 5u Cellulose-4 PC-4 (0.46 cm x 25 cm), *n*-hexane/2-propanol = 90/10,  $\nu = 1.0$  mL  $\cdot$  min $^{-1}$ ,  $\lambda = 254$  nm,  $t$  (major) = 9.03 min,  $t$  (minor) = 16.64 min], 95:5 e.r.;  $[\alpha]_{\text{D}}^{20} = -169.8$  ( $c = 0.20$ ,  $\text{CHCl}_3$ ).

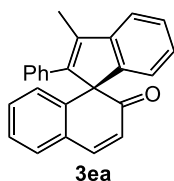

White solid, 25.2 mg, 38% yield.  $^1\text{H}$  NMR (400 MHz,  $\text{CDCl}_3$ )  $\delta$  7.57 (d,  $J = 10.0$  Hz, 1H), 7.47-6.96 (m, 11H), 6.93 (d,  $J = 7.2$  Hz, 1H), 6.81 (d,  $J = 7.6$  Hz, 1H), 6.32 (d,  $J = 10.0$  Hz, 1H), 2.39 (s, 3H), spectral data were in agreement with those reported in the literature;<sup>6</sup> [Phenomenex Lux 5u Cellulose-4 PC-4 (0.46 cm x 25 cm), *n*-hexane/2-propanol = 90/10,  $\nu = 1.0$  mL  $\cdot$  min $^{-1}$ ,  $\lambda = 254$  nm,  $t$  (major) = 31.83 min,  $t$  (minor) = 40.57 min], 89:11 e.r.;  $[\alpha]_{\text{D}}^{20} = -123.5$  ( $c = 0.20$ ,  $\text{CHCl}_3$ ).

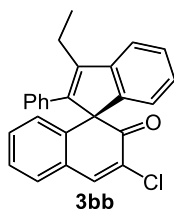

White solid, m.p. = 139-141 °C, 67.7 mg, 88% yield.  $^1\text{H}$  NMR (400 MHz,  $\text{CDCl}_3$ )  $\delta$  7.68 (s, 1H), 7.44 (d,  $J = 7.6$  Hz, 1H), 7.36-7.12 (m, 7H), 7.08 (t,  $J = 7.2$  Hz, 1H),

6.95-6.91 (m, 3H), 6.82 (d,  $J = 7.6$  Hz, 1H), 2.71 (q,  $J = 7.6$  Hz, 2H), 1.33 (t,  $J = 7.6$  Hz, 3H);  $^{13}\text{C}$  NMR (100 MHz,  $\text{CDCl}_3$ )  $\delta$  190.1, 147.7, 146.0, 145.4, 144.2, 143.1, 139.7, 134.8, 130.8, 130.4, 129.9, 129.1, 128.6, 128.2, 128.0, 127.7, 127.4, 127.2, 126.3, 122.0, 120.8, 73.2, 19.6, 13.7; IR (thin film):  $\nu_{\text{max}}(\text{cm}^{-1}) = 2972, 1668, 1608, 1558, 1274, 752$ ; HRMS (ESI) calcd for  $\text{C}_{26}\text{H}_{20}\text{ClO}$   $[\text{M} + \text{H}]^+$ : 383.1197; Found: 383.1196; [Phenomenex Lux 5u Amylose-2 PA-2 (0.46 cm x 25 cm),  $n$ -hexane/2-propanol = 90/10,  $\nu = 1.0 \text{ mL} \cdot \text{min}^{-1}$ ,  $\lambda = 254 \text{ nm}$ ,  $t$  (major) = 19.47 min,  $t$  (minor) = 26.89 min], 96:4 e.r.;  $[\alpha]_{\text{D}}^{20} = -150.9$  ( $c = 1.00$ ,  $\text{CHCl}_3$ ).

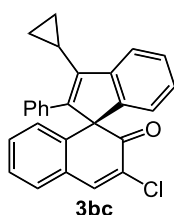

Pale yellow solid, m.p. = 160-162 °C, 58.8 mg, 74% yield.  $^1\text{H}$  NMR (400 MHz,  $\text{CDCl}_3$ )  $\delta$  7.76 (s, 1H), 7.57 (d,  $J = 7.6$  Hz, 1H), 7.31-7.26 (m, 2H), 7.25-7.06 (m, 7H), 7.03 (t,  $J = 7.6$  Hz, 1H), 6.90 (d,  $J = 7.6$  Hz, 1H), 6.75 (d,  $J = 7.6$  Hz, 1H), 1.98 (dq,  $J = 8.4, 5.6$  Hz, 1H), 1.02-0.90 (m, 2H), 0.67-0.60 (m, 2H);  $^{13}\text{C}$  NMR (100 MHz,  $\text{CDCl}_3$ )  $\delta$  189.9, 146.9, 146.0, 145.1, 144.8, 143.1, 140.1, 134.4, 130.7, 130.5, 129.6, 129.2, 129.0, 128.0, 127.9, 127.7, 127.2, 126.9, 126.2, 121.5, 72.7, 8.9, 7.4, 7.2; IR (thin film):  $\nu_{\text{max}}(\text{cm}^{-1}) = 2999, 1680, 1606, 1493, 1225, 1062, 757$ ; HRMS (ESI) calcd for  $\text{C}_{27}\text{H}_{20}\text{ClO}$   $[\text{M} + \text{H}]^+$ : 395.1197; Found: 395.1196; [Phenomenex Lux 5u Amylose-2 PA-2 (0.46 cm x 25 cm),  $n$ -hexane/2-propanol = 98/2,  $\nu = 1.0 \text{ mL} \cdot \text{min}^{-1}$ ,  $\lambda = 254 \text{ nm}$ ,  $t$  (minor) = 40.14 min,  $t$  (major) = 44.14 min], 97:3 e.r.;  $[\alpha]_{\text{D}}^{20} = -126.3$  ( $c = 1.00$ ,  $\text{CHCl}_3$ ).

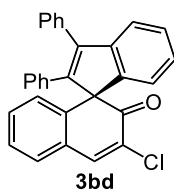

Yellow solid, m.p. = 126-128 °C, 73.1 mg, 85% yield.  $^1\text{H}$  NMR (400 MHz,  $\text{CDCl}_3$ )  $\delta$  7.86 (s, 1H), 7.54-7.48 (m, 2H), 7.47-7.34 (m, 4H), 7.31-7.21 (m, 3H), 7.17 (td,  $J =$

7.6, 1.2 Hz, 1H), 7.07 (td,  $J = 7.6, 1.2$  Hz, 1H), 7.03-6.93 (m, 5H), 6.84-6.78 (m, 2H);  $^{13}\text{C}$  NMR (100 MHz,  $\text{CDCl}_3$ )  $\delta$  189.4, 146.8, 145.3, 144.9, 144.3, 143.3, 140.0, 134.8, 133.9, 130.8, 130.7, 129.45, 129.43, 129.4, 129.0, 128.8, 128.1, 128.0, 127.95, 127.92, 127.2, 126.8, 126.6, 122.1, 121.6, 72.7; IR (thin film):  $\nu_{\text{max}}(\text{cm}^{-1}) = 3065, 2923, 1675, 1607, 1487, 1226, 751, 688$ ; HRMS (ESI) calcd for  $\text{C}_{30}\text{H}_{23}\text{ClNO}$   $[\text{M} + \text{NH}_4]^+$ : 448.1463; Found: 448.1460; [Phenomenex Lux 5u Cellulose-4 PC-4 (0.46 cm x 25 cm),  $n$ -hexane/2-propanol = 98/2,  $\nu = 1.0 \text{ mL} \cdot \text{min}^{-1}$ ,  $\lambda = 254 \text{ nm}$ ,  $t$  (minor) = 15.63 min,  $t$  (major) = 17.69 min], 96:4 e.r.;  $[\alpha]_{\text{D}}^{20} = -197.5$  ( $c = 0.20$ ,  $\text{CHCl}_3$ ).

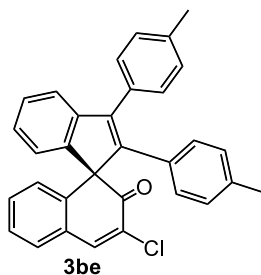

Yellow foam, m.p. = 88-89 °C, 57.0 mg, 62% yield.  $^1\text{H}$  NMR (400 MHz,  $\text{CDCl}_3$ )  $\delta$  7.84 (s, 1H), 7.41-7.35 (m, 3H), 7.29-7.20 (m, 5H), 7.16-7.12 (m, 1H), 7.05-7.01 (m, 1H), 7.00-6.92 (m, 2H), 6.79 (d,  $J = 8.4$  Hz, 2H), 6.71 (d,  $J = 8.4$  Hz, 2H), 2.40 (s, 3H), 2.13 (s, 3H);  $^{13}\text{C}$  NMR (100 MHz,  $\text{CDCl}_3$ )  $\delta$  189.6, 146.6, 145.5, 144.2, 143.9, 143.2, 140.3, 137.6, 137.9, 132.0, 131.0, 130.8, 130.7, 129.5, 129.4, 129.3, 129.2, 128.81, 128.77, 128.0, 127.8, 126.8, 126.3, 121.9, 121.5, 72.6, 21.4, 21.0; IR (thin film):  $\nu_{\text{max}}(\text{cm}^{-1}) = 2987, 2917, 1676, 1608, 1558, 1226, 1020, 751$ ; HRMS (ESI) calcd for  $\text{C}_{32}\text{H}_{27}\text{ClNO}$   $[\text{M} + \text{NH}_4]^+$ : 476.1776; Found: 476.1774; [Phenomenex Lux 5u Amylose-2 PA-2 (0.46 cm x 25 cm),  $n$ -hexane/2-propanol = 90/10,  $\nu = 1.0 \text{ mL} \cdot \text{min}^{-1}$ ,  $\lambda = 254 \text{ nm}$ ,  $t$  (minor) = 17.15 min,  $t$  (major) = 27.73 min], 96:4 e.r.;  $[\alpha]_{\text{D}}^{20} = -207.0$  ( $c = 0.20$ ,  $\text{CHCl}_3$ ).

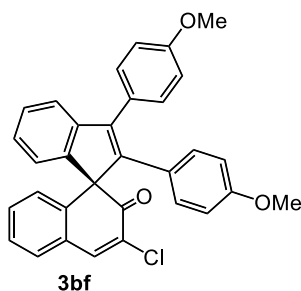

Yellow foam, m.p. = 89-90 °C, 84.4 mg, 86% yield.  $^1\text{H}$  NMR (400 MHz,  $\text{CDCl}_3$ )  $\delta$  7.85 (s, 1H), 7.44 (d,  $J$  = 8.4 Hz, 2H), 7.36 (d,  $J$  = 7.6 Hz, 1H), 7.30-7.20 (m, 3H), 7.16-7.12 (m, 1H), 7.07-6.90 (m, 5H), 6.76 (d,  $J$  = 8.8 Hz, 2H), 6.53 (d,  $J$  = 8.8 Hz, 2H), 3.83 (s, 3H), 3.61 (s, 3H);  $^{13}\text{C}$  NMR (100 MHz,  $\text{CDCl}_3$ )  $\delta$  189.7, 159.1, 158.4, 146.5, 145.6, 143.4, 143.3, 143.0, 140.4, 130.8, 130.7, 130.6, 130.2, 129.4, 129.3, 128.0, 127.8, 127.1, 126.7, 126.5, 126.1, 121.7, 121.4, 114.3, 113.5, 72.6, 55.2, 54.9; IR (thin film):  $\nu_{\text{max}}(\text{cm}^{-1})$  = 2999, 2930, 2835, 1675, 1607, 1502, 1461, 1245, 1028, 732; HRMS (ESI) calcd for  $\text{C}_{32}\text{H}_{27}\text{ClNO}_3$   $[\text{M} + \text{NH}_4]^+$ : 508.1674; Found: 508.1672; [Phenomenex Lux 5u Amylose-2 PA-2 (0.46 cm x 25 cm), *n*-hexane/2-propanol = 80/20,  $\nu$  = 1.0 mL  $\cdot$  min $^{-1}$ ,  $\lambda$  = 254 nm,  $t$  (minor) = 22.16 min,  $t$  (major) = 30.93 min], 96:4 e.r.;  $[\alpha]_{\text{D}}^{20}$  = -199.4 ( $c$  = 0.20,  $\text{CHCl}_3$ ).

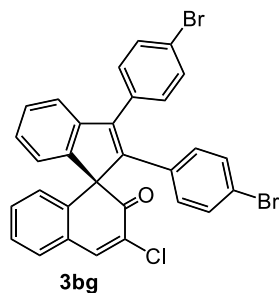

Yellow foam, m.p. = 108-110 °C, 70.4 mg, 60% yield.  $^1\text{H}$  NMR (400 MHz,  $\text{CDCl}_3$ )  $\delta$  7.86 (s, 1H), 7.61-7.54 (m, 2H), 7.40-7.35 (m, 3H), 7.32-7.23 (m, 3H), 7.21-7.05 (m, 4H), 7.00 (d,  $J$  = 7.6 Hz, 1H), 6.92-6.86 (m, 1H), 6.68-6.61 (m, 2H);  $^{13}\text{C}$  NMR (100 MHz,  $\text{CDCl}_3$ )  $\delta$  189.1, 146.7, 144.4, 144.3, 143.7, 143.5, 139.2, 133.2, 132.6, 132.2, 131.4, 131.0, 130.9, 130.6, 130.4, 129.6, 129.4, 128.3, 128.2, 127.1, 126.8, 122.8, 121.9, 121.8, 121.6, 72.7; IR (thin film):  $\nu_{\text{max}}(\text{cm}^{-1})$  = 2987, 2901, 1675, 1481, 1452, 1068, 752; HRMS (ESI) calcd for  $\text{C}_{30}\text{H}_{21}\text{Br}_2\text{ClNO}$   $[\text{M} + \text{NH}_4]^+$ : 603.9673; Found: 603.9670; [Phenomenex Lux 5u Amylose-2 PA-2 (0.46 cm x 25 cm), *n*-hexane/2-propanol = 90/10,  $\nu$  = 1.0 mL  $\cdot$  min $^{-1}$ ,  $\lambda$  = 254 nm,  $t$  (minor) = 15.93 min,  $t$  (major) = 22.97 min], 97:3 e.r.;  $[\alpha]_{\text{D}}^{20}$  = -140.2 ( $c$  = 0.20,  $\text{CHCl}_3$ ).

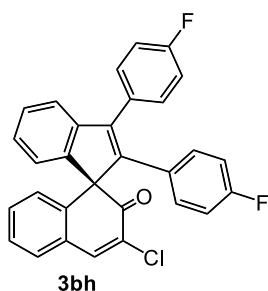

Pale yellow solid, m.p. = 174-176 °C, 60.6 mg, 65% yield.  $^1\text{H}$  NMR (400 MHz,  $\text{CDCl}_3$ )  $\delta$  7.85 (s, 1H), 7.49-7.42 (m, 2H), 7.39 (dd,  $J$  = 7.6, 1.2 Hz, 1H), 7.31-7.27 (m, 3H), 7.22-7.07 (m, 4H), 7.01 (d,  $J$  = 7.6 Hz, 1H), 6.92 (dd,  $J$  = 7.6, 0.4 Hz, 1H), 6.79-6.67 (m, 4H);  $^{13}\text{C}$  NMR (100 MHz,  $\text{CDCl}_3$ )  $\delta$  189.4, 162.4 (d,  $J$  = 246.4 Hz), 161.7 (d,  $J$  = 247.2 Hz), 146.7, 144.8, 143.8, 143.7, 143.4, 139.5, 131.2, 131.1, 130.8, 130.74, 130.68, 130.66, 130.3 (d,  $J$  = 3.5 Hz), 129.9 (d,  $J$  = 3.4 Hz), 128.2, 128.1, 126.8, 121.9, 121.8, 116.0 (d,  $J$  = 21.3 Hz), 115.2 (d,  $J$  = 21.3 Hz), 72.8;  $^{19}\text{F}$  NMR (376 Hz,  $\text{CDCl}_3$ )  $\delta$  -113.1 (m), -113.5 (m); IR (thin film):  $\nu_{\text{max}}(\text{cm}^{-1})$  = 2987, 2901, 1675, 1601, 1499, 1451, 1065, 753; HRMS (ESI) calcd for  $\text{C}_{30}\text{H}_{21}\text{ClF}_2\text{NO}$  [ $\text{M} + \text{NH}_4$ ] $^+$ : 484.1274; Found: 484.1274; [Phenomenex Lux 5u Amylose-2 PA-2 (0.46 cm x 25 cm), *n*-hexane/2-propanol = 90/10,  $\nu$  = 1.0 mL  $\cdot$  min $^{-1}$ ,  $\lambda$  = 254 nm,  $t$  (minor) = 13.42 min,  $t$  (major) = 16.97 min], 96:4 e.r.;  $[\alpha]_{\text{D}}^{20}$  = -189.5 ( $c$  = 1.00,  $\text{CHCl}_3$ ).

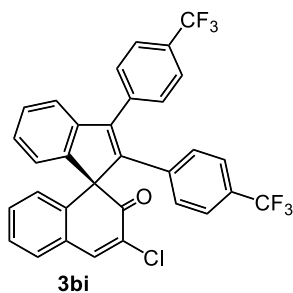

Pale yellow solid, m.p. = 145-147 °C, 61.2 mg, 54% yield.  $^1\text{H}$  NMR (400 MHz,  $\text{CDCl}_3$ )  $\delta$  7.89 (s, 1H), 7.73 (d,  $J$  = 8.4 Hz, 2H), 7.62 (d,  $J$  = 8.0 Hz, 2H), 7.42 (d,  $J$  = 7.6 Hz, 1H), 7.35-7.18 (m, 6H), 7.17-7.11 (m, 1H), 7.04 (d,  $J$  = 7.6 Hz, 1H), 6.94 (d,  $J$  = 8.0 Hz, 1H), 6.90 (d,  $J$  = 8.0 Hz, 2H);  $^{13}\text{C}$  NMR (100 MHz,  $\text{CDCl}_3$ )  $\delta$  188.9, 146.9, 145.5, 144.1, 144.0, 143.5, 138.9, 138.0, 137.2, 131.0, 130.7, 130.3, 129.79, 129.77, 129.5, 129.6, 128.5, 128.4, 127.5, 126.8, 126.1 (q,  $J$  = 3.7 Hz), 125.4, 125.2 (q,  $J$  = 3.8 Hz), 122.7, 122.5, 122.2, 122.0, 73.0;  $^{19}\text{F}$  NMR (376 Hz,  $\text{CDCl}_3$ )  $\delta$  -154.5, -154.8; IR (thin film):  $\nu_{\text{max}}(\text{cm}^{-1})$  = 2970, 2901, 1680, 1613, 1563, 1453, 1318, 1065, 753;



HRMS (ESI) calcd for  $C_{32}H_{21}ClF_6NO$   $[M + NH_4]^+$ : 584.1210; Found: 584.1208; [Phenomenex Lux 5u Amylose-2 PA-2 (0.46 cm x 25 cm), *n*-hexane/2-propanol = 98/2,  $\nu = 1.0 \text{ mL} \cdot \text{min}^{-1}$ ,  $\lambda = 254 \text{ nm}$ ,  $t$  (minor) = 15.16 min,  $t$  (major) = 21.53 min], 97:3 e.r.;  $[\alpha]_D^{20} = -135.5$  ( $c = 0.20$ ,  $CHCl_3$ ).

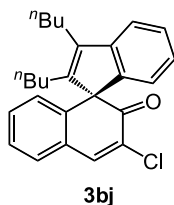

Yellow oil, 76.6 mg, 98% yield.  $^1H$  NMR (400 MHz,  $CDCl_3$ )  $\delta$  7.83 (s, 1H), 7.35 (d,  $J = 7.6 \text{ Hz}$ , 1H), 7.30-7.22 (m, 3H), 7.17-7.13 (m, 1H), 7.01-6.95 (m, 1H), 6.83 (d,  $J = 7.2 \text{ Hz}$ , 1H), 6.62 (d,  $J = 7.6 \text{ Hz}$ , 1H), 2.62 (t,  $J = 7.6 \text{ Hz}$ , 2H), 2.29-2.22 (m, 1H), 2.09-1.99 (m, 1H), 1.74-1.58 (m, 2H), 1.54-1.41 (m, 2H), 1.22-1.02 (m, 4H), 0.98 (t,  $J = 7.2 \text{ Hz}$ , 3H), 0.75 (t,  $J = 7.2 \text{ Hz}$ , 3H);  $^{13}C$  NMR (100 MHz,  $CDCl_3$ )  $\delta$  190.4, 148.0, 146.4, 146.1, 143.0, 142.6, 140.0, 130.9, 130.2, 129.7, 129.1, 127.64, 127.63, 127.2, 125.4, 121.7, 119.7, 72.0, 30.9, 27.0, 25.4, 23.0, 22.8, 14.1, 13.6; IR (thin film):  $\nu_{\text{max}}(\text{cm}^{-1}) = 2955, 2930, 2859, 1677, 1610, 1559, 1465, 1227, 750$ ; HRMS (ESI) calcd for  $C_{26}H_{31}ClNO$   $[M + NH_4]^+$ : 408.2089; Found: 408.2087; [Phenomenex Lux 5u Amylose-2 PA-2 (0.46 cm x 25 cm), *n*-hexane/2-propanol = 90/10,  $\nu = 1.0 \text{ mL} \cdot \text{min}^{-1}$ ,  $\lambda = 254 \text{ nm}$ ,  $t$  (minor) = 9.42 min,  $t$  (major) = 10.69 min], 92:8 e.r.;  $[\alpha]_D^{20} = -116.9$  ( $c = 1.00$ ,  $CHCl_3$ ).

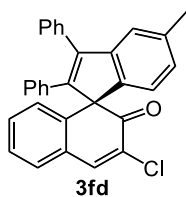

Yellow foam, m.p. = 86-87 °C, 68.5 mg, 77% yield.  $^1H$  NMR (400 MHz,  $CDCl_3$ )  $\delta$  7.82 (s, 1H), 7.54-7.47 (m, 2H), 7.45-7.33 (m, 4H), 7.24-7.20 (m, 1H), 7.15-7.12 (m, 1H), 7.08 (s, 1H), 7.01-6.93 (m, 4H), 6.91-6.85 (m, 2H), 6.81-6.79 (m, 2H), 2.27 (s, 3H);  $^{13}C$  NMR (100 MHz,  $CDCl_3$ )  $\delta$  189.5, 145.4, 144.9, 144.5, 144.0, 143.2, 140.2, 138.0, 134.9, 133.9, 130.7, 130.6, 129.4, 129.3, 129.0, 128.9, 128.0, 127.9, 127.8, 127.3, 127.1, 126.7, 122.7, 121.3, 72.3, 21.5; IR (thin film):  $\nu_{\text{max}}(\text{cm}^{-1}) = 3053, 3021, 2920, 1676, 1607, 1558, 1343, 1226, 745$ ; HRMS (ESI) calcd for  $C_{31}H_{25}ClNO$   $[M +$



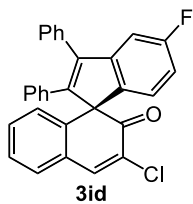

Yellow solid, m.p. = 169-170 °C, 64.4 mg, 72% yield.  $^1\text{H}$  NMR (400 MHz,  $\text{CDCl}_3$ )  $\delta$  7.83 (s, 1H), 7.52-7.34 (m, 6H), 7.29-7.25 (m, 1H), 7.20-7.16 (m, 1H), 7.06-6.89 (m, 6H), 6.82-6.71 (m, 3H);  $^{13}\text{C}$  NMR (100 MHz,  $\text{CDCl}_3$ )  $\delta$  189.2, 164.3, 161.9, 147.6 (d,  $J = 8.8$  Hz), 146.4, 144.0 (d,  $J = 3.0$  Hz), 143.4, 142.2 (d,  $J = 2.5$  Hz), 139.5, 134.2, 133.5, 130.9, 130.6, 129.5, 129.4, 129.2, 129.0, 128.2, 128.09, 128.07, 127.5, 126.8, 122.8 (d,  $J = 9.2$  Hz), 113.2 (d,  $J = 23.4$  Hz), 109.3 (d,  $J = 23.2$  Hz), 72.0;  $^{19}\text{F}$  NMR (376 Hz,  $\text{CDCl}_3$ )  $\delta$  -113.5 (m); IR (thin film):  $\nu_{\text{max}}(\text{cm}^{-1}) = 2987, 1672, 1594, 1558, 1487, 1464, 1138, 747$ ; HRMS (ESI) calcd for  $\text{C}_{30}\text{H}_{22}\text{ClFNO}$   $[\text{M} + \text{NH}_4]^+$ : 466.1368; Found: 466.1365; [Phenomenex Lux 5u Cellulose-4 PC-4 (0.46 cm x 25 cm),  $n$ -hexane/2-propanol = 90/10,  $\nu = 1.0 \text{ mL} \cdot \text{min}^{-1}$ ,  $\lambda = 254 \text{ nm}$ ,  $t$  (minor) = 7.83 min,  $t$  (major) = 8.91 min], 94:6 e.r.;  $[\alpha]_{\text{D}}^{20} = -154.2$  ( $c = 0.20$ ,  $\text{CHCl}_3$ ).

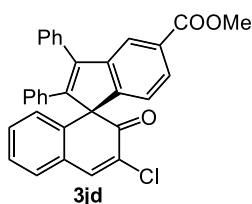

Yellow foam, m.p. = 94-95 °C, 70.0 mg, 72% yield.  $^1\text{H}$  NMR (400 MHz,  $\text{CDCl}_3$ )  $\delta$  7.94 (s, 1H), 7.86 (s, 1H), 7.81 (d,  $J = 8.0$  Hz, 1H), 7.51-7.39 (m, 6H), 7.29 (t,  $J = 7.2$  Hz, 1H), 7.19 (t,  $J = 7.2$  Hz, 1H), 7.11-6.96 (m, 4H), 6.94 (d,  $J = 8.0$  Hz, 1H), 6.80-6.78 (m, 2H), 3.85 (s, 3H);  $^{13}\text{C}$  NMR (100 MHz,  $\text{CDCl}_3$ )  $\delta$  188.7, 166.7, 151.4, 145.8, 145.7, 144.2, 143.5, 138.9, 134.1, 133.5, 130.9, 130.6, 130.3, 129.6, 129.4, 129.3, 129.0, 128.96, 128.4, 128.3, 128.2, 128.1, 127.5, 126.8, 122.9, 121.7, 72.6, 52.1; IR (thin film):  $\nu_{\text{max}}(\text{cm}^{-1}) = 2988, 2917, 1718, 1676, 1436, 1344, 1286, 699$ ; HRMS (ESI) calcd for  $\text{C}_{32}\text{H}_{25}\text{ClINO}_3$   $[\text{M} + \text{NH}_4]^+$ : 506.1517; Found: 506.1516; [Daicel Chiralpak AD-H (0.46 cm x 25 cm),  $n$ -hexane/2-propanol = 90/10,  $\nu = 1.0 \text{ mL} \cdot \text{min}^{-1}$ ,  $\lambda = 254 \text{ nm}$ ,  $t$  (major) = 11.00 min,  $t$  (minor) = 16.59 min], 91:9 e.r.;  $[\alpha]_{\text{D}}^{20} = -132.3$  ( $c = 1.00$ ,  $\text{CHCl}_3$ ).

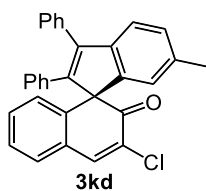

Yellow foam, m.p. = 99-100 °C, 72.3 mg, 81% yield.  $^1\text{H}$  NMR (400 MHz,  $\text{CDCl}_3$ )  $\delta$  7.84 (s, 1H), 7.50-7.48 (m, 2H), 7.44-7.33 (m, 4H), 7.24 (t,  $J$  = 7.2 Hz, 1H), 7.19-7.11 (m, 2H), 7.04 (d,  $J$  = 7.6 Hz, 1H), 7.01-6.91 (m, 4H), 6.80-6.78 (m, 3H), 2.21 (s, 3H);  $^{13}\text{C}$  NMR (100 MHz,  $\text{CDCl}_3$ )  $\delta$  189.6, 147.1, 144.8, 143.5, 143.3, 142.6, 140.2, 136.6, 135.0, 134.0, 130.8, 130.7, 129.4, 129.35, 129.33, 128.9, 128.82, 128.76, 128.0, 127.9, 127.8, 127.0, 126.9, 122.3, 121.8, 72.5, 21.4; IR (thin film):  $\nu_{\text{max}}(\text{cm}^{-1})$  = 3021, 2919, 1676, 1608, 1558, 1486, 1227, 823, 743; HRMS (ESI) calcd for  $\text{C}_{31}\text{H}_{25}\text{ClNO}$  [ $\text{M} + \text{NH}_4$ ] $^+$ : 462.1619; Found: 462.1617; [Phenomenex Lux 5u Amylose-2 PA-2 (0.46 cm x 25 cm), *n*-hexane/2-propanol = 80/20,  $\nu$  = 1.0  $\text{mL} \cdot \text{min}^{-1}$ ,  $\lambda$  = 254 nm,  $t$  (minor) = 9.46 min,  $t$  (major) = 19.64 min], 93:7 e.r.;  $[\alpha]_{\text{D}}^{20}$  = -155.2 ( $c$  = 0.20,  $\text{CHCl}_3$ ).

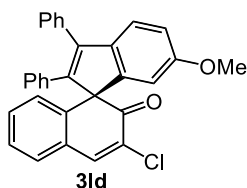

Yellow solid, m.p. = 176-177 °C, 74.1 mg, 80% yield.  $^1\text{H}$  NMR (400 MHz,  $\text{CDCl}_3$ )  $\delta$  7.83 (s, 1H), 7.50-7.35 (m, 6H), 7.31-7.10 (m, 3H), 6.99-6.96 (m, 4H), 6.78-6.76 (m, 3H), 6.58 (s, 1H), 3.68 (s, 3H);  $^{13}\text{C}$  NMR (100 MHz,  $\text{CDCl}_3$ )  $\delta$  189.4, 158.8, 148.4, 144.4, 143.3, 142.5, 140.2, 138.1, 135.0, 134.0, 130.8, 130.6, 129.4, 129.3, 128.81, 128.76, 128.0, 127.90, 127.86, 126.94, 126.89, 122.6, 112.6, 108.9, 72.4, 55.5; IR (thin film):  $\nu_{\text{max}}(\text{cm}^{-1})$  = 2934, 1672, 1593, 1577, 1477, 1029, 701; HRMS (ESI) calcd for  $\text{C}_{31}\text{H}_{25}\text{ClNO}_2$  [ $\text{M} + \text{NH}_4$ ] $^+$ : 478.1568; Found: 478.1566; [Daicel Chiralpak AD-H (0.46 cm x 25 cm), *n*-hexane/2-propanol = 98/2,  $\nu$  = 1.0  $\text{mL} \cdot \text{min}^{-1}$ ,  $\lambda$  = 254 nm,  $t$  (major) = 25.29 min,  $t$  (minor) = 28.26 min], 96:4 e.r.;  $[\alpha]_{\text{D}}^{20}$  = -156.5 ( $c$  = 0.20,  $\text{CHCl}_3$ ).

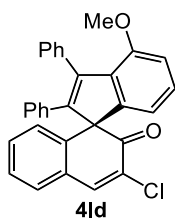

Yellow solid, m.p. = 187-189 °C, 7.1 mg, 8% yield.  $^1\text{H}$  NMR (400 MHz,  $\text{CDCl}_3$ )  $\delta$  7.82 (s, 1H), 7.47-7.45 (m, 2H), 7.37-7.30 (m, 4H), 7.23-7.15 (m, 2H), 7.07-7.01 (m, 2H), 6.98-6.89 (m, 3H), 6.76 (d,  $J$  = 8.4 Hz, 1H), 6.69-6.68 (m, 2H), 6.63 (d,  $J$  = 7.6 Hz, 1H), 3.56 (s, 3H);  $^{13}\text{C}$  NMR (151 MHz,  $\text{CDCl}_3$ )  $\delta$  189.3, 155.0, 148.7, 144.9, 143.9, 143.2, 140.1, 136.7, 134.2, 132.3, 130.8, 130.7, 129.8, 129.5, 129.3, 129.1, 128.1, 127.9, 127.8, 127.5, 127.1, 127.0, 126.8, 114.6, 111.9, 72.7, 55.5; IR (thin film):  $\nu_{\text{max}}(\text{cm}^{-1})$  = 2919, 2850, 1672, 1592, 1475, 1346, 1263, 1065, 747; HRMS (ESI) calcd for  $\text{C}_{31}\text{H}_{25}\text{ClNO}_2$   $[\text{M} + \text{NH}_4]^+$ : 478.1568; Found: 478.1566; [Phenomenex Lux 5u Cellulose-4 PC-4 (0.46 cm x 25 cm), *n*-hexane/2-propanol = 98/2,  $\nu$  = 1.0 mL  $\cdot$  min $^{-1}$ ,  $\lambda$  = 254 nm,  $t$  (minor) = 25.67 min,  $t$  (major) = 31.16 min], 97:3 e.r.;  $[\alpha]_{\text{D}}^{20}$  = -108.8 ( $c$  = 0.10,  $\text{CHCl}_3$ ).

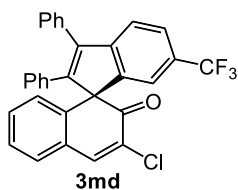

Pale brown solid, m.p. = 179-180 °C, 32.8 mg, 33% yield.  $^1\text{H}$  NMR (400 MHz,  $\text{CDCl}_3$ )  $\delta$  7.87 (s, 1H), 7.53 (d,  $J$  = 8.0 Hz, 1H), 7.50-7.36 (m, 7H), 7.34-7.30 (m, 1H), 7.24-7.17 (m, 2H), 7.06-6.98 (m, 3H), 6.92 (d,  $J$  = 8.0 Hz, 1H), 6.81-6.75 (m, 2H);  $^{13}\text{C}$  NMR (100 MHz,  $\text{CDCl}_3$ )  $\delta$  188.7, 149.0, 147.6, 147.3, 143.8, 143.7, 138.5, 134.0, 133.2, 131.0, 130.6, 129.8, 129.5, 129.3, 129.0, 128.6, 128.4, 128.3, 128.2, 128.0, 127.8, 126.9, 125.7 (q,  $J$  = 3.8 Hz), 124.1 (q,  $J$  = 270.9 Hz), 122.0, 118.6 (q,  $J$  = 3.7 Hz), 72.5;  $^{19}\text{F}$  NMR (376 Hz,  $\text{CDCl}_3$ )  $\delta$  -61.6; IR (thin film):  $\nu_{\text{max}}(\text{cm}^{-1})$  = 2922, 1676, 1611, 1562, 1486, 1319, 1123, 698; HRMS (ESI) calcd for  $\text{C}_{31}\text{H}_{22}\text{ClF}_3\text{NO}$   $[\text{M} + \text{NH}_4]^+$ : 516.1337; Found: 516.1335; [Phenomenex Lux 5u Amylose-2 PA-2 (0.46 cm x 25 cm), *n*-hexane/2-propanol = 90/10,  $\nu$  = 1.0 mL  $\cdot$  min $^{-1}$ ,  $\lambda$  = 254 nm,  $t$  (minor) = 8.48 min,  $t$  (major) = 11.14 min], 93:7 e.r.;  $[\alpha]_{\text{D}}^{20}$  = -109.1 ( $c$  = 0.20,  $\text{CHCl}_3$ ).

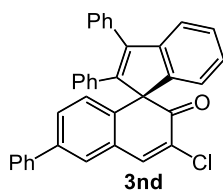

Yellow solid, m.p. = 205-206 °C, 83.5 mg, 82% yield. <sup>1</sup>H NMR (400 MHz, CDCl<sub>3</sub>) δ 7.90 (s, 1H), 7.63-7.47 (m, 5H), 7.47-7.17 (m, 9H), 7.16-6.92 (m, 6H), 6.91-6.79 (m, 2H); <sup>13</sup>C NMR (100 MHz, CDCl<sub>3</sub>) δ 189.4, 146.7, 145.2, 144.9, 144.2, 143.3, 140.8, 139.3, 138.7, 134.7, 133.9, 131.1, 129.8, 129.4, 129.0, 128.9, 128.8, 128.13, 128.06, 128.0, 127.9, 127.8, 127.3, 127.2, 126.8, 126.6, 122.1, 121.6, 72.5; IR (thin film): ν<sub>max</sub>(cm<sup>-1</sup>) = 3028, 1681, 1596, 1553, 1484, 753; HRMS (ESI) calcd for C<sub>36</sub>H<sub>27</sub>ClNO [M + NH<sub>4</sub>]<sup>+</sup>: 524.1776; Found: 524.1772; [Phenomenex Lux 5u Cellulose-4 PC-4 (0.46 cm x 25 cm), *n*-hexane/2-propanol = 98/2, ν = 1.0 mL · min<sup>-1</sup>, λ = 254 nm, t (minor) = 20.57 min, t (major) = 28.33 min], 97:3 e.r.; [α]<sub>D</sub><sup>20</sup> = -154.0 (c = 0.20, CHCl<sub>3</sub>).

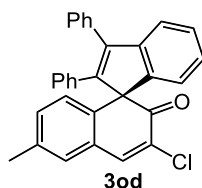

Yellow foam, m.p. = 73-74 °C, 57.7 mg, 65% yield. <sup>1</sup>H NMR (400 MHz, CDCl<sub>3</sub>) δ 7.81 (s, 1H), 7.56-7.33 (m, 5H), 7.32-7.15 (m, 3H), 7.12-6.92 (m, 6H), 6.94-6.76 (m, 3H), 2.30 (s, 3H); <sup>13</sup>C NMR (100 MHz, CDCl<sub>3</sub>) δ 189.7, 147.0, 145.2, 144.8, 144.4, 143.5, 137.7, 136.9, 134.9, 133.9, 131.7, 130.6, 130.0, 129.4, 129.3, 129.0, 128.8, 128.0, 127.9, 127.1, 126.7, 126.5, 122.0, 121.5, 72.4, 20.9; IR (thin film): ν<sub>max</sub>(cm<sup>-1</sup>) = 2993, 2849, 1677, 1598, 1558, 1488, 755, 699; HRMS (ESI) calcd for C<sub>31</sub>H<sub>25</sub>ClNO [M + NH<sub>4</sub>]<sup>+</sup>: 462.1619; Found: 462.1617; [Phenomenex Lux 5u Cellulose-4 PC-4 (0.46 cm x 25 cm), *n*-hexane/2-propanol = 98/2, *v* = 1.0 mL · min<sup>-1</sup>, λ = 254 nm, t (minor) = 16.28 min, t (major) = 19.86 min], 96:4 e.r.; [α]<sub>D</sub><sup>20</sup> = -181.1 (c = 1.00, CHCl<sub>3</sub>).

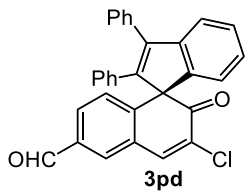

Yellow foam, m.p. = 94-96 °C, 63.3 mg, 69% yield. <sup>1</sup>H NMR (400 MHz, CDCl<sub>3</sub>) δ 9.94 (s, 1H), 7.94-7.90 (m, 2H), 7.66 (dd, *J* = 8.0, 1.2 Hz, 1H), 7.57-7.36 (m, 5H), 7.34-7.25 (m, 2H), 7.14-6.94 (m, 6H), 6.80-6.79 (m, 2H); <sup>13</sup>C NMR (100 MHz, CDCl<sub>3</sub>) δ 190.6, 188.4, 146.5, 145.8, 145.4, 145.3, 143.7, 141.8, 135.9, 134.4, 133.4, 132.3, 131.4, 130.1, 130.0, 129.3, 128.9, 128.8, 128.5, 128.20, 128.17, 127.7, 127.5, 126.8, 122.4, 121.6, 72.7; IR (thin film): ν<sub>max</sub>(cm<sup>-1</sup>) = 2987, 2924, 1681, 1609, 1488, 1151, 756, 699; HRMS (ESI) calcd for C<sub>31</sub>H<sub>23</sub>ClNO<sub>2</sub> [M + NH<sub>4</sub>]<sup>+</sup>: 476.1412; Found: 476.1408; [Daicel Chiralpak AD-H (0.46 cm x 25 cm), *n*-hexane/2-propanol = 90/10, ν = 1.0 mL · min<sup>-1</sup>, λ = 254 nm, t (major) = 15.57 min, t (minor) = 17.47 min], 95:5 e.r.; [α]<sub>D</sub><sup>20</sup> = -157.8 (c = 1.00, CHCl<sub>3</sub>).

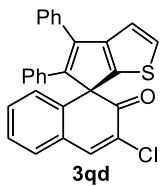

Yellow foam, m.p. = 188-189 °C, 9.5 mg, 11% yield. <sup>1</sup>H NMR (400 MHz, CDCl<sub>3</sub>) δ 7.60 (s, 1H), 7.45-7.43 (m, 2H), 7.36 (d, *J* = 5.2 Hz, 1H), 7.33-7.24 (m, 6H), 7.13-7.06 (m, 2H), 7.04-6.99 (m, 3H), 6.73-6.71 (m, 2H); <sup>13</sup>C NMR (100 MHz, CDCl<sub>3</sub>) δ 188.8, 151.6, 148.2, 145.9, 142.8, 139.9, 138.8, 134.6, 134.4, 130.7, 130.5, 129.7, 129.4, 129.1, 129.0, 128.8, 128.4, 128.2, 128.0, 127.98, 127.4, 127.2, 120.1, 70.8; IR (thin film): ν<sub>max</sub>(cm<sup>-1</sup>) = 2988, 2969, 2922, 1678, 1611, 1593, 1227, 696; HRMS (ESI) calcd for C<sub>28</sub>H<sub>18</sub>ClOS [M + H]<sup>+</sup>: 437.0761; Found: 437.0754; [Phenomenex Lux 5u Cellulose-4 PC-4 (0.46 cm x 25 cm), *n*-hexane/2-propanol = 90/10, ν = 1.0 mL · min<sup>-1</sup>, λ = 254 nm, t (minor) = 11.12 min, t (major) = 14.30 min], 95:5 e.r.; [α]<sub>D</sub><sup>20</sup> = -18.1 (c = 0.20, CHCl<sub>3</sub>).

## Deuterium-labeling Experiments:

a) Intramolecular kinetic isotope effect experiment.

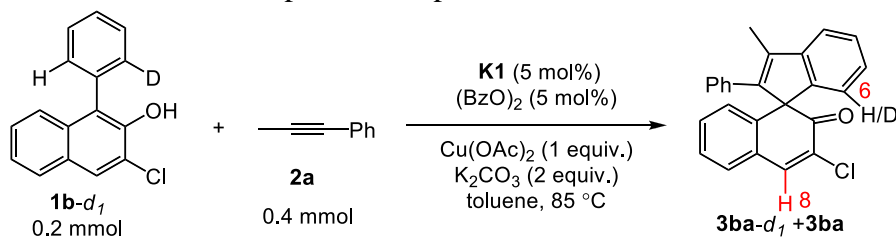

To a Schlenk tube were added **K1** (10 μmol, 5.6 mg), (BzO)<sub>2</sub> (10 μmol, 2.4 mg) and toluene (1 mL) successively. After the mixture was stirred at room temperature for 30 min, **1b-d<sub>1</sub>** (51.1 mg, 0.2 mmol), Cu(OAc)<sub>2</sub> (36.4 mg, 0.2 mmol), K<sub>2</sub>CO<sub>3</sub> (55.2 mg, 0.4 mmol), **2a** (46.5 mg, 0.4 mmol) and toluene (1 mL) were added successively. The mixture was stirred at 85 °C under air (open flask). After 70 min and 10 min respectively, the mixture was concentrated under reduced pressure and the residue was purified by column chromatography (ethyl acetate/petroleum ether = 1/50, v/v) to afford a mixture of **3ba** and **3ba-d<sub>1</sub>** in 63% yield (46.5 mg) and 32% yield (23.9 mg), respectively. The KIE value (approx 3.8) was obtained by integrating the H8 of the spiro **3ba** and the H6 of the spiro **3ba** and **3ba-d<sub>1</sub>**.

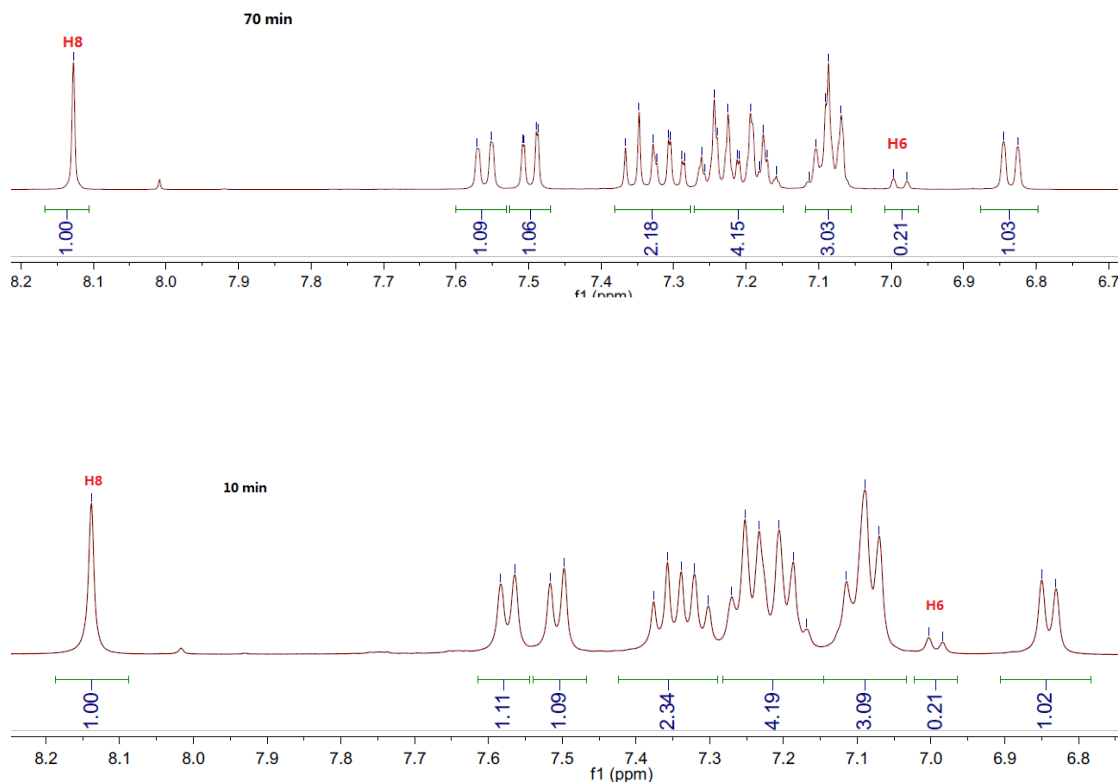



b) Intermolecular kinetic isotope effect experiment.

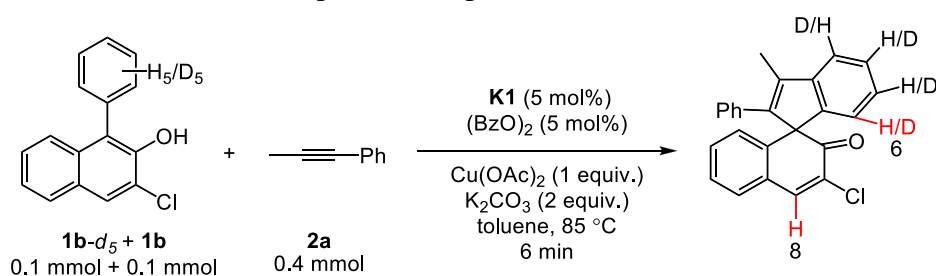

To a Schlenk tube were added **K1** (10  $\mu$ mol, 5.6 mg), **(BzO)<sub>2</sub>** (10  $\mu$ mol, 2.4 mg) and toluene (1 mL) successively. After the mixture was stirred at room temperature for 30 min, **1b** (25.5 mg, 0.1 mmol), **1b-d<sub>5</sub>** (26.0 mg, 0.1 mmol), **Cu(OAc)<sub>2</sub>** (36.4 mg, 0.2 mmol), **K<sub>2</sub>CO<sub>3</sub>** (55.2 mg, 0.4 mmol), **2a** (46.5 mg, 0.4 mmol) and toluene (1 mL) were added successively. The mixture was stirred at 85 °C under air (open flask). After 6 min, the mixture was concentrated under reduced pressure and the residue was purified by column chromatography (ethyl acetate/petroleum ether = 1/50, v/v) to afford a mixture of **3ba** and **3ba-d<sub>5</sub>** in 21% yield (16.0 mg). The KIE value (approx 5.7) was obtained by integrating the H8 of the spiro **3ba** and the H6 of the spiro **3ba** and **3ba-d<sub>5</sub>**. The ratio between **3ba** and **3ba-d<sub>5</sub>** was also determined to be 6.5 by the analysis of HRMS.

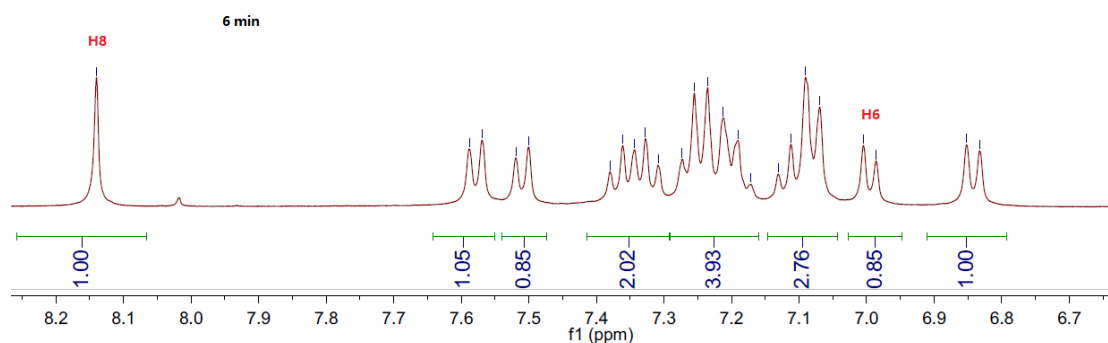

### Procedure for the Synthesis of Alcohol **5bd**:

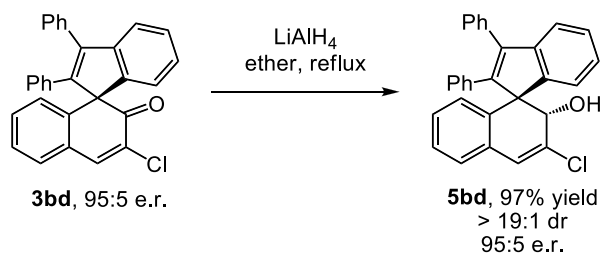

To a stirred mixture of lithium aluminum hydride (3.8 mg, 0.1 mmol) in anhydrous diethyl ether (1 mL) at 0 °C was added **3bd** (43.1 mg, 0.1 mmol). The mixture was refluxed for 10 min, then cold to 0 °C, and treated successively with water (4  $\mu$ L), 15% NaOH aqueous solution (8  $\mu$ L), and water (12  $\mu$ L). After stirring for 20 min, Na<sub>2</sub>SO<sub>4</sub> was added and the slurry was filtered through celite. After concentration under reduced pressure, the residue was purified by column chromatography (ethyl acetate/petroleum ether = 1/15, v/v) to afford **5bd** (41.8 mg, 97% yield). **5bd**, colorless foam, m.p. = 63-64 °C. <sup>1</sup>H NMR (400 MHz, CDCl<sub>3</sub>)  $\delta$  7.42-7.18 (m, 10H), 7.10-7.05 (m, 2H), 7.02-6.99 (m, 2H), 6.93 (d,  $J$  = 7.2 Hz, 1H), 6.77 (d,  $J$  = 8.0 Hz, 1H), 6.69 (d,  $J$  = 7.6 Hz, 2H), 6.17 (d,  $J$  = 1.6 Hz, 1H), 5.18 (d,  $J$  = 2.4 Hz, 1H), 1.98 (d,  $J$  = 4.4 Hz, 1H); <sup>13</sup>C NMR (100 MHz, CDCl<sub>3</sub>)  $\delta$  149.2, 147.0, 145.5, 141.0, 136.1, 134.8, 134.18, 134.15, 134.1, 129.5, 125.4, 128.2, 128.05, 127.99, 127.9, 127.2, 127.1, 126.9, 126.6, 126.55, 126.53, 125.5, 123.0, 121.0, 74.0, 66.4; IR (thin film):  $\nu_{\text{max}}$ (cm<sup>-1</sup>) = 3540, 3055, 3024, 2923, 1634, 1597, 1096, 741, 698; HRMS (ESI) calcd for C<sub>30</sub>H<sub>21</sub>ClO [M]<sup>+</sup>: 432.1281; Found: 432.1276; [Daicel Chiralpak AD-H (0.46 cm x 25 cm), *n*-hexane/2-propanol = 90/10,  $\nu$  = 1.0 mL · min<sup>-1</sup>,  $\lambda$  = 254 nm,  $t$  (minor) = 17.30 min,  $t$  (major) = 21.22 min], 95:5 e.r.; [ $\alpha$ ]<sub>D</sub><sup>20</sup> = -46.2 ( $c$  = 0.16, CHCl<sub>3</sub>).

Assignment of the structure.

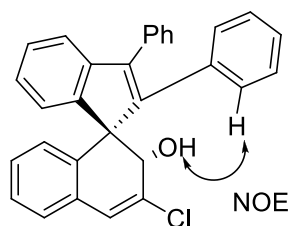

The structure was assigned based on the HMBC, COSY, <sup>13</sup>C NMR experiments, as well as by the observation of noe between the alcohol hydrogen and the benzene hydrogen of the spiro unit.

### Procedure for the Synthesis of Compound 5aa:

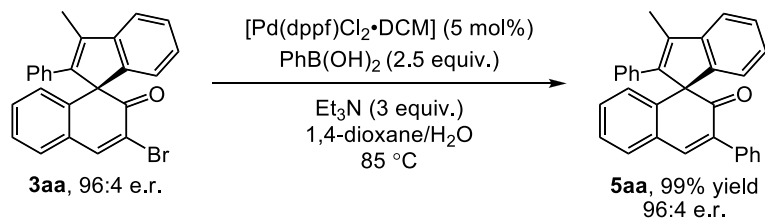

A flame-dried sealed tube was cooled to room temperature and filled with argon. To this tube were added **3aa** (41.3 mg, 0.1 mmol, 96:4 e.r.), Pd(dppf)Cl<sub>2</sub>•DCM (4.1 mg, 0.005 mmol, 5 mol%), PhB(OH)<sub>2</sub> (30.5 mg, 0.25 mmol), and Et<sub>3</sub>N (30.4 mg, 0.3 mmol). The tube was evacuated and refilled with argon and placed under an argon atmosphere. To this mixture were added freshly distilled dioxane (1.0 mL) and deionized water (0.1 mL). After the reaction flask was degassed twice, the reaction mixture was stirred at 80 °C. After the reaction was complete (monitored by TLC), the solvents were removed under reduced pressure. Then the residue was purified by silica gel column chromatography (PE/EA = 40/1, v/v) to afford the desired product **5aa** (41.0 mg, 99% yield). **5aa**, light yellow solid, m.p. = 159-160 °C. <sup>1</sup>H NMR (400 MHz, CDCl<sub>3</sub>) δ 7.66 (s, 1H), 7.44-7.38 (m, 4H), 7.36-7.26 (m, 4H), 7.26-7.06 (m, 9H), 6.86 (d, *J* = 7.2 Hz, 1H), 2.39 (s, 3H); <sup>13</sup>C NMR (100 MHz, CDCl<sub>3</sub>) δ 195.9, 147.0, 146.3, 144.1, 143.0, 140.6, 139.7, 136.8, 135.6, 135.2, 130.6, 130.0, 129.8, 128.9, 128.5, 128.1, 128.07, 127.8, 127.6, 127.0, 126.8, 126.2, 121.4, 120.6, 73.0, 12.4; IR (thin film): ν<sub>max</sub>(cm<sup>-1</sup>) = 3055, 3020, 1660, 1597, 1492, 1466, 817, 694; HRMS (ESI) calcd for C<sub>31</sub>H<sub>23</sub>O [M+H]<sup>+</sup>: 411.1743; Found: 411.1749; [Phenomenex Lux 5u Cellulose-4 PC-4 (0.46 cm x 25 cm), *n*-hexane/2-propanol = 95/5, ν = 1.0 mL · min<sup>-1</sup>, λ = 254 nm, t (major) = 9.33 min, t (minor) = 15.43 min], 96:4 e.r.; [α]<sub>D</sub><sup>20</sup> = -517.8 (c = 1.00, CHCl<sub>3</sub>).

References:

1. Ye, B.; Cramer, N. *J. Am. Chem. Soc.* **2013**, *135*, 636.
2. Truong, T.; Daugulis, O. *Chem. Sci.* **2013**, *4*, 531.
3. Wender, P. A.; Deschamps, N. M.; Williams, T. J. *Angew. Chem. Int. Ed.* **2004**, *43*, 3076.
4. Mio, M. J.; Kopel, L. C.; Braun, J. B.; Gadzikwa, T. L.; Hull, K. L.; Brisbois, R. G.; Markworth, C. J.; Grieco, P. A. *Org. Lett.* **2002**, *4*, 3199.
5. T. Oguma, T. Katsuki, *J. Am. Chem. Soc.* **2012**, *134*, 20017.
6. Nan, J.; Zuo, Z.; Luo, L.; Bai, L.; Zheng, H.; Yuan, Y.; Liu, J.; Luan, X.; Wang, Y. *J. Am. Chem. Soc.* **2013**, *135*, 17306.

X-ray crystal structure of **3aa** (CCDC 1049299)

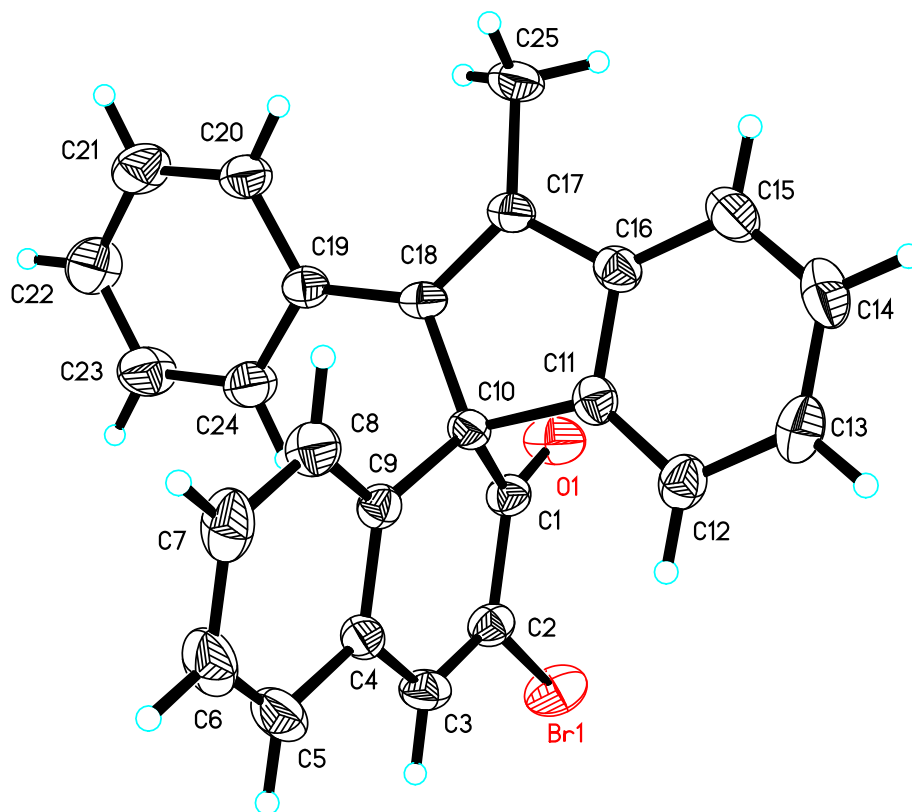

Table 1. Crystal data and structure refinement for cd214620.

|                      |                                      |          |
|----------------------|--------------------------------------|----------|
| Identification code  | cd214620                             |          |
| Empirical formula    | C <sub>25</sub> H <sub>17</sub> Br O |          |
| Formula weight       | 413.29                               |          |
| Temperature          | 293(2) K                             |          |
| Wavelength           | 0.71073 Å                            |          |
| Crystal system       | Monoclinic                           |          |
| Space group          | P 21                                 |          |
| Unit cell dimensions | a = 14.7015(17) Å                    | a = 90 ° |
|                      | b = 8.9613(10) Å                     | b =      |
|                      | 114.880(2) °                         |          |
|                      | c = 15.8849(18) Å                    | g = 90 ° |
| Volume               | 1898.5(4) Å <sup>3</sup>             |          |
| Z                    | 4                                    |          |
| Density (calculated) | 1.446 Mg/m <sup>3</sup>              |          |

|                                   |                                             |
|-----------------------------------|---------------------------------------------|
| Absorption coefficient            | 2.177 mm <sup>-1</sup>                      |
| F(000)                            | 840                                         |
| Crystal size                      | 0.211 x 0.134 x 0.112 mm <sup>3</sup>       |
| Theta range for data collection   | 2.479 to 25.999 °                           |
| Index ranges                      | -16<=h<=18, -11<=k<=9, -19<=l<=18           |
| Reflections collected             | 11507                                       |
| Independent reflections           | 6635 [R(int) = 0.0263]                      |
| Completeness to theta = 25.242 °  | 99.8 %                                      |
| Absorption correction             | Semi-empirical from equivalents             |
| Max. and min. transmission        | 0.7457 and 0.5664                           |
| Refinement method                 | Full-matrix least-squares on F <sup>2</sup> |
| Data / restraints / parameters    | 6635 / 1 / 489                              |
| Goodness-of-fit on F <sup>2</sup> | 1.007                                       |
| Final R indices [I>2sigma(I)]     | R1 = 0.0391, wR2 = 0.0945                   |
| R indices (all data)              | R1 = 0.0515, wR2 = 0.0995                   |
| Absolute structure parameter      | 0.006(5)                                    |
| Extinction coefficient            | n/a                                         |
| Largest diff. peak and hole       | 0.790 and -0.481 e.Å <sup>-3</sup>          |

# Copies of NMR Spectra and HPLC Chromatographs

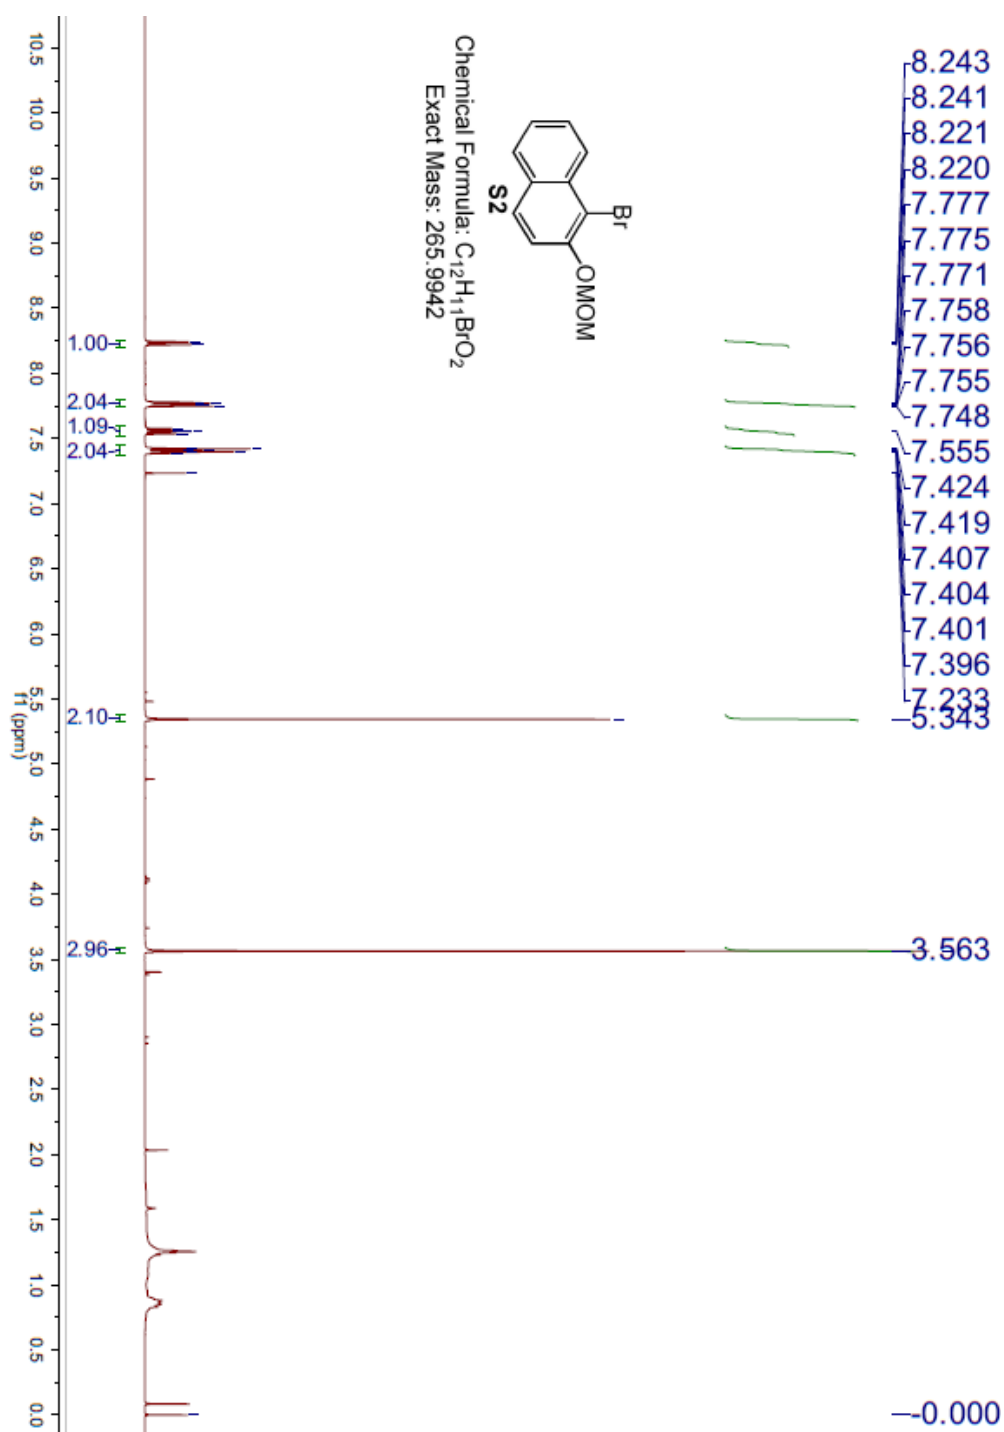

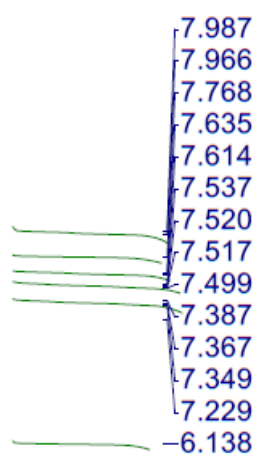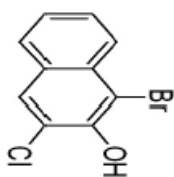

Chemical Formula:  $C_{10}H_6BrClO$   
Exact Mass: 255.9291

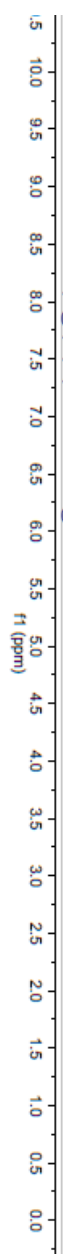



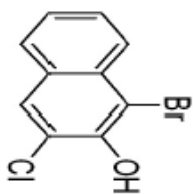

Chemical Formula:  $C_{10}H_6BrClO$   
Exact Mass: 255.9291

-146.588

129.010  
127.981  
127.316  
125.669  
125.151  
-106.786

77.396  
77.078  
76.759

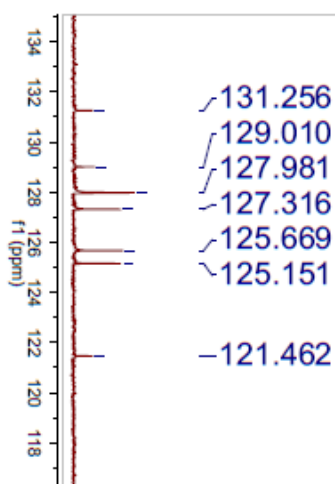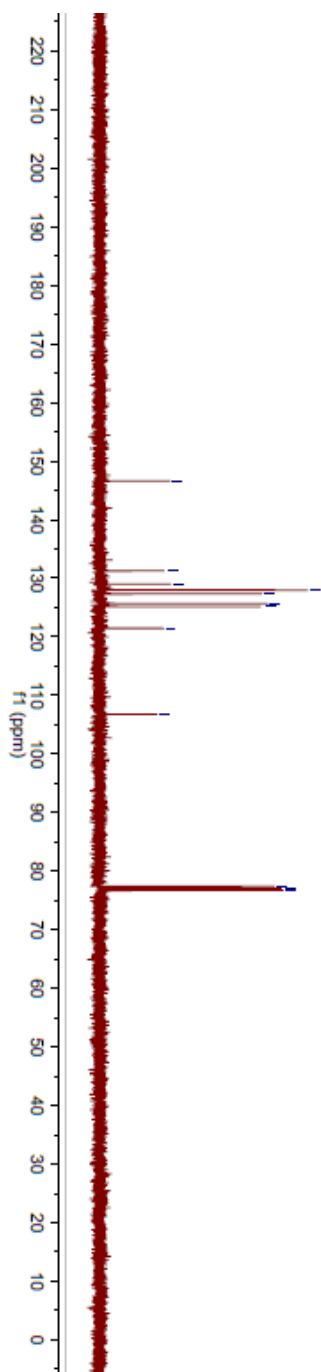

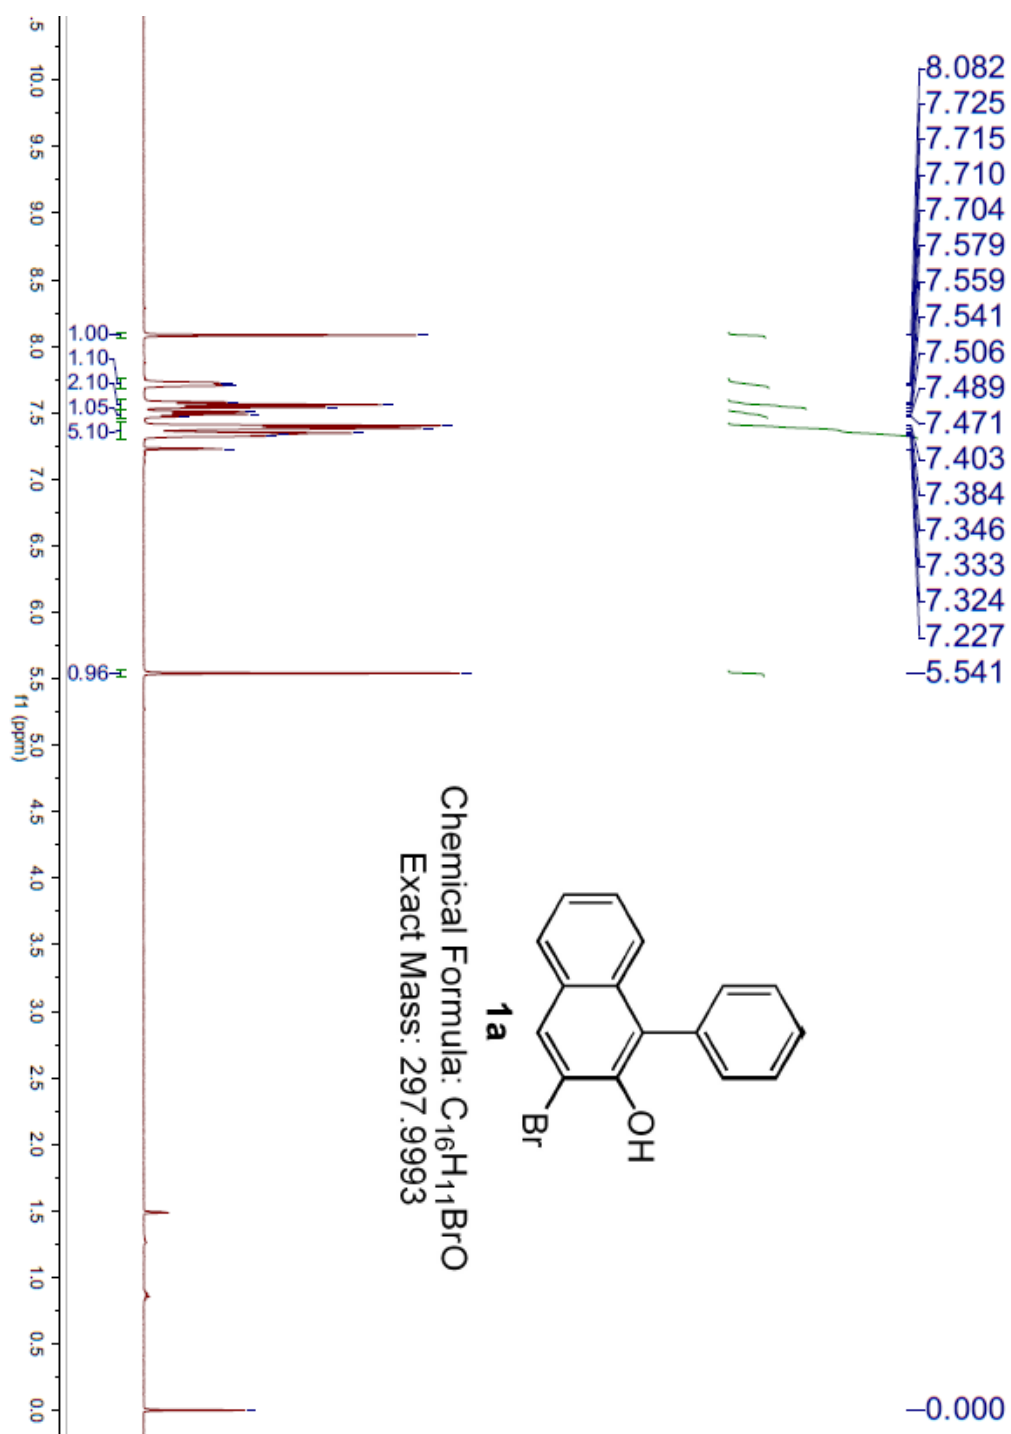

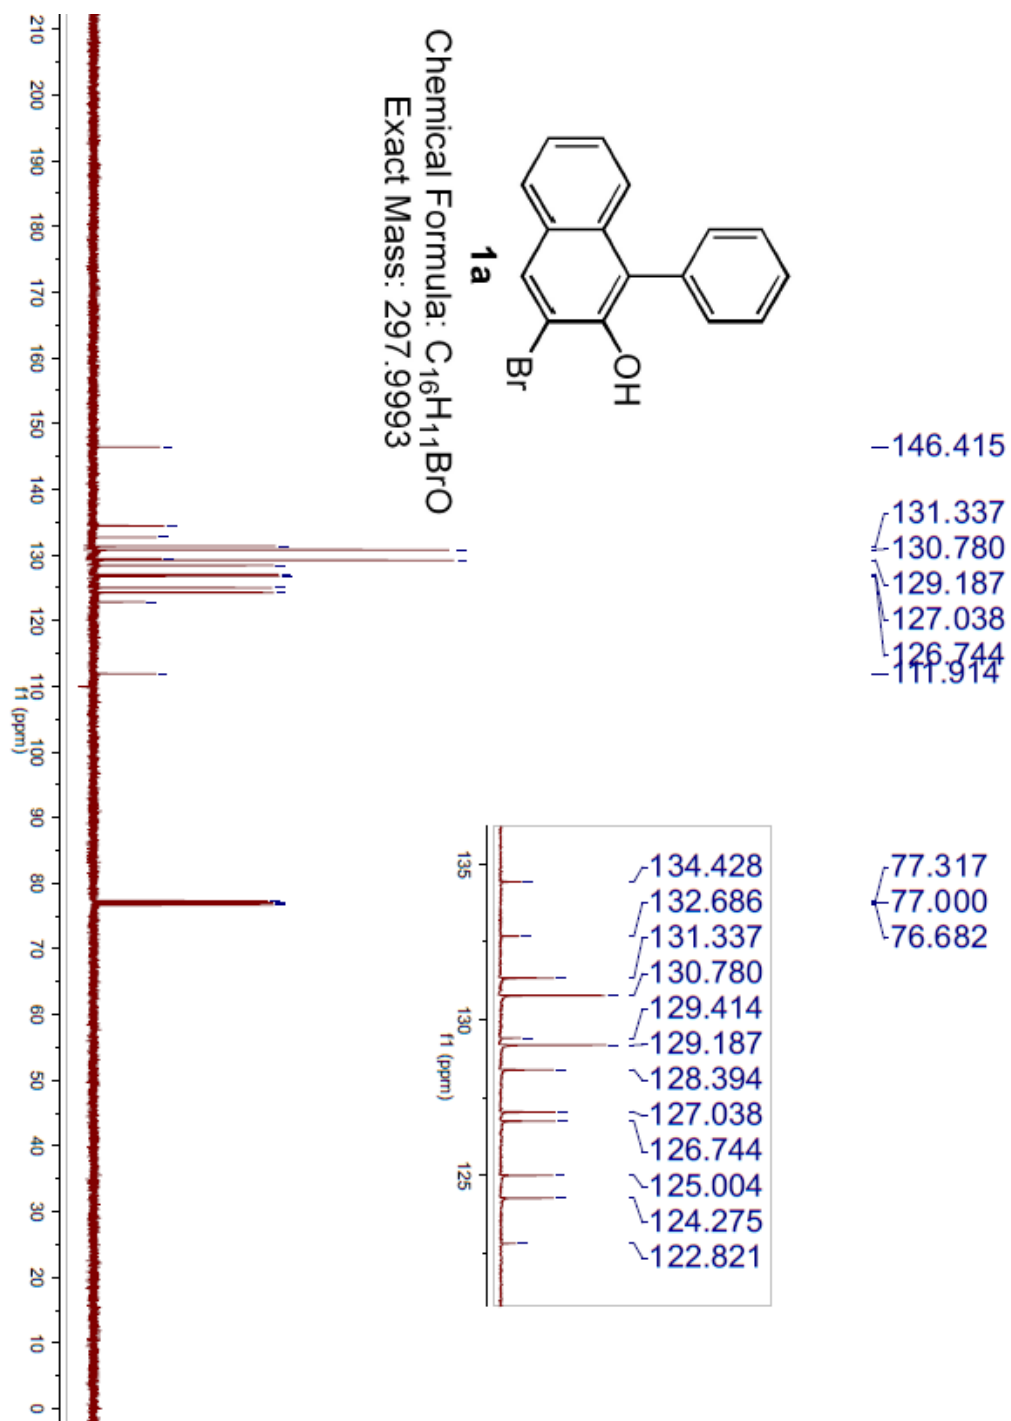

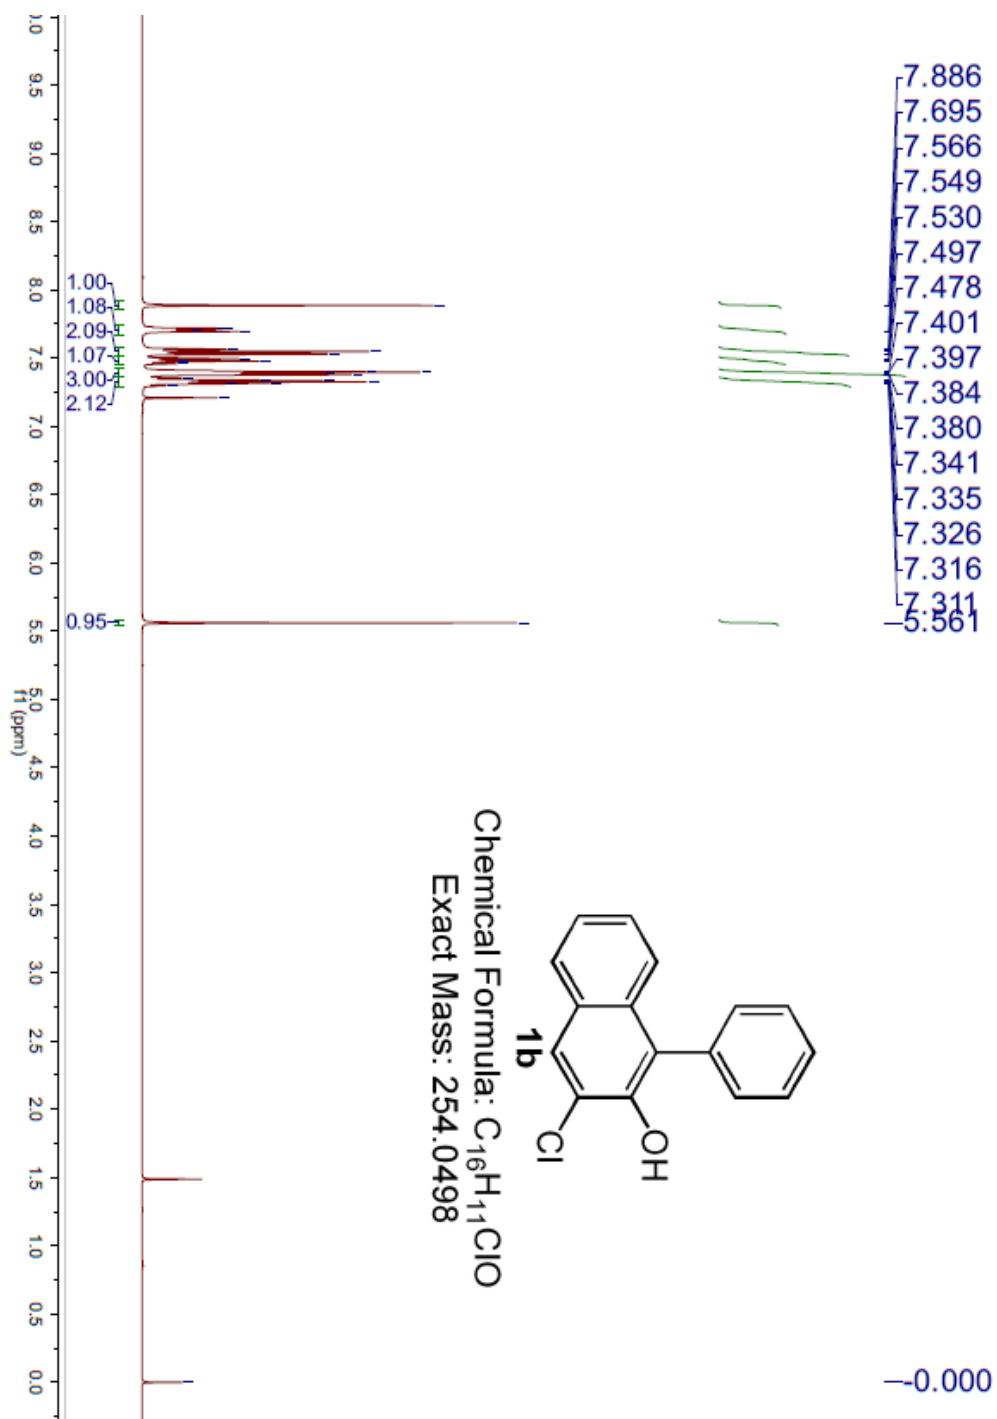

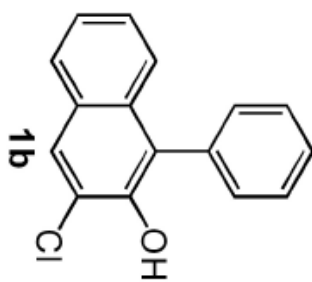

**1b**

Chemical Formula:  $C_{16}H_{11}ClO$   
Exact Mass: 254.0498

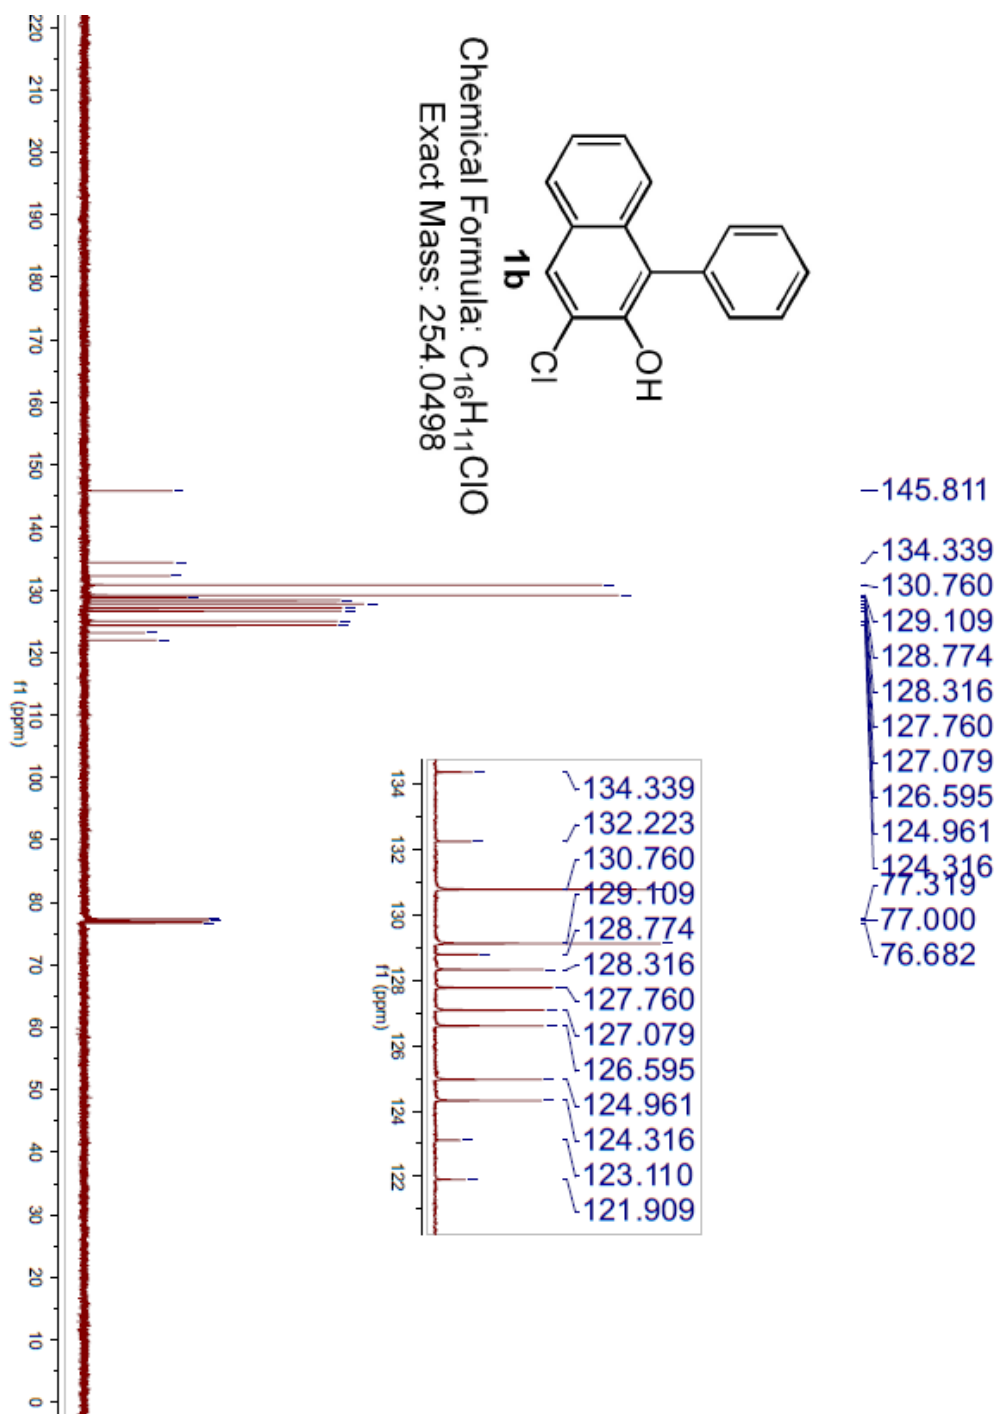

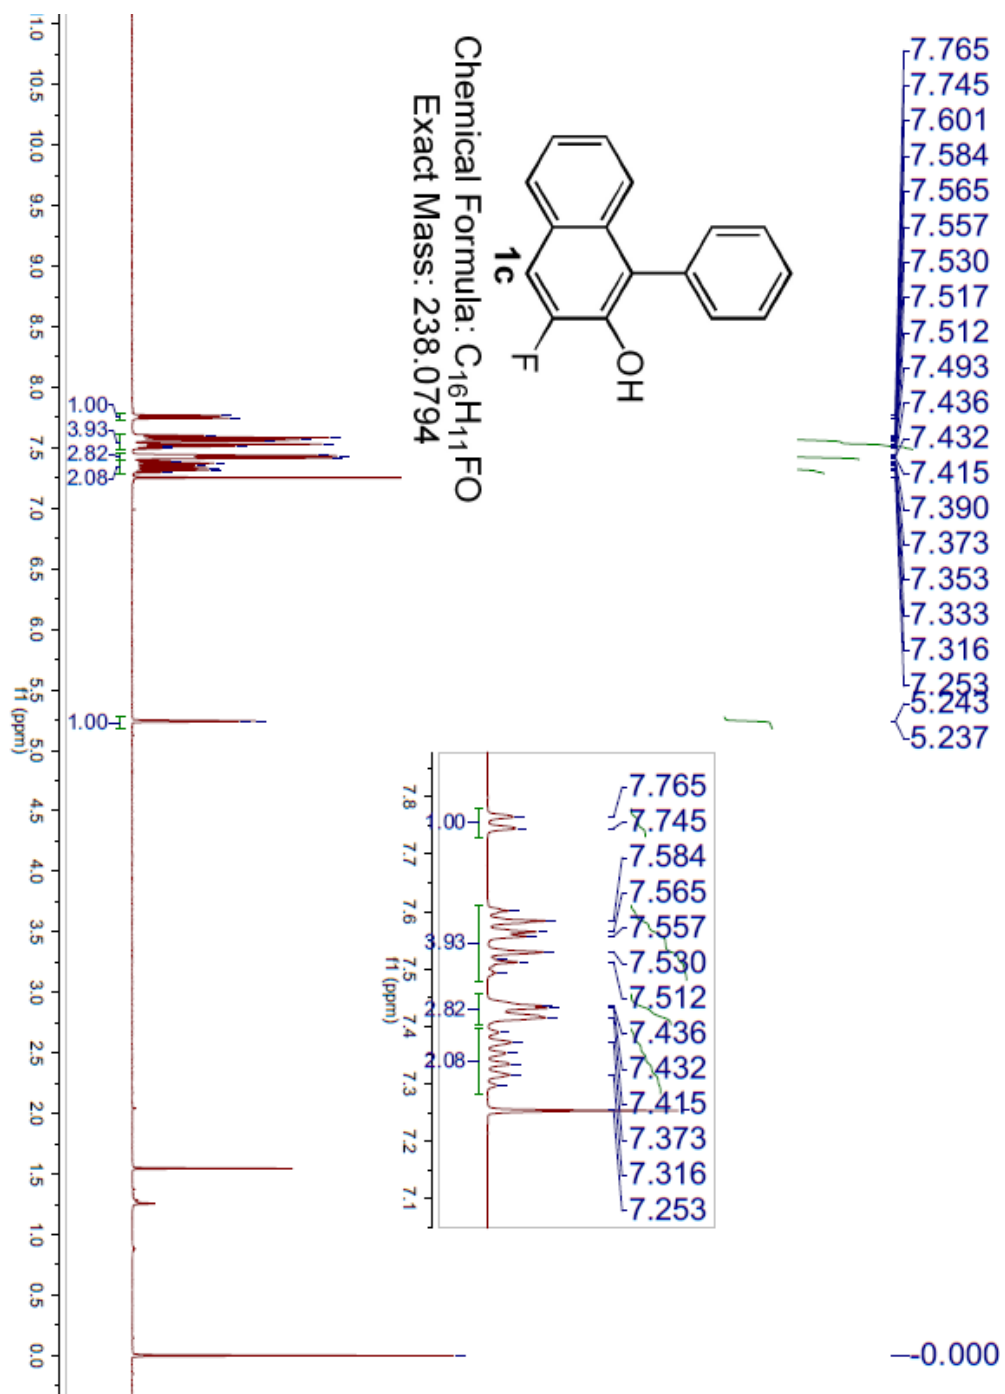

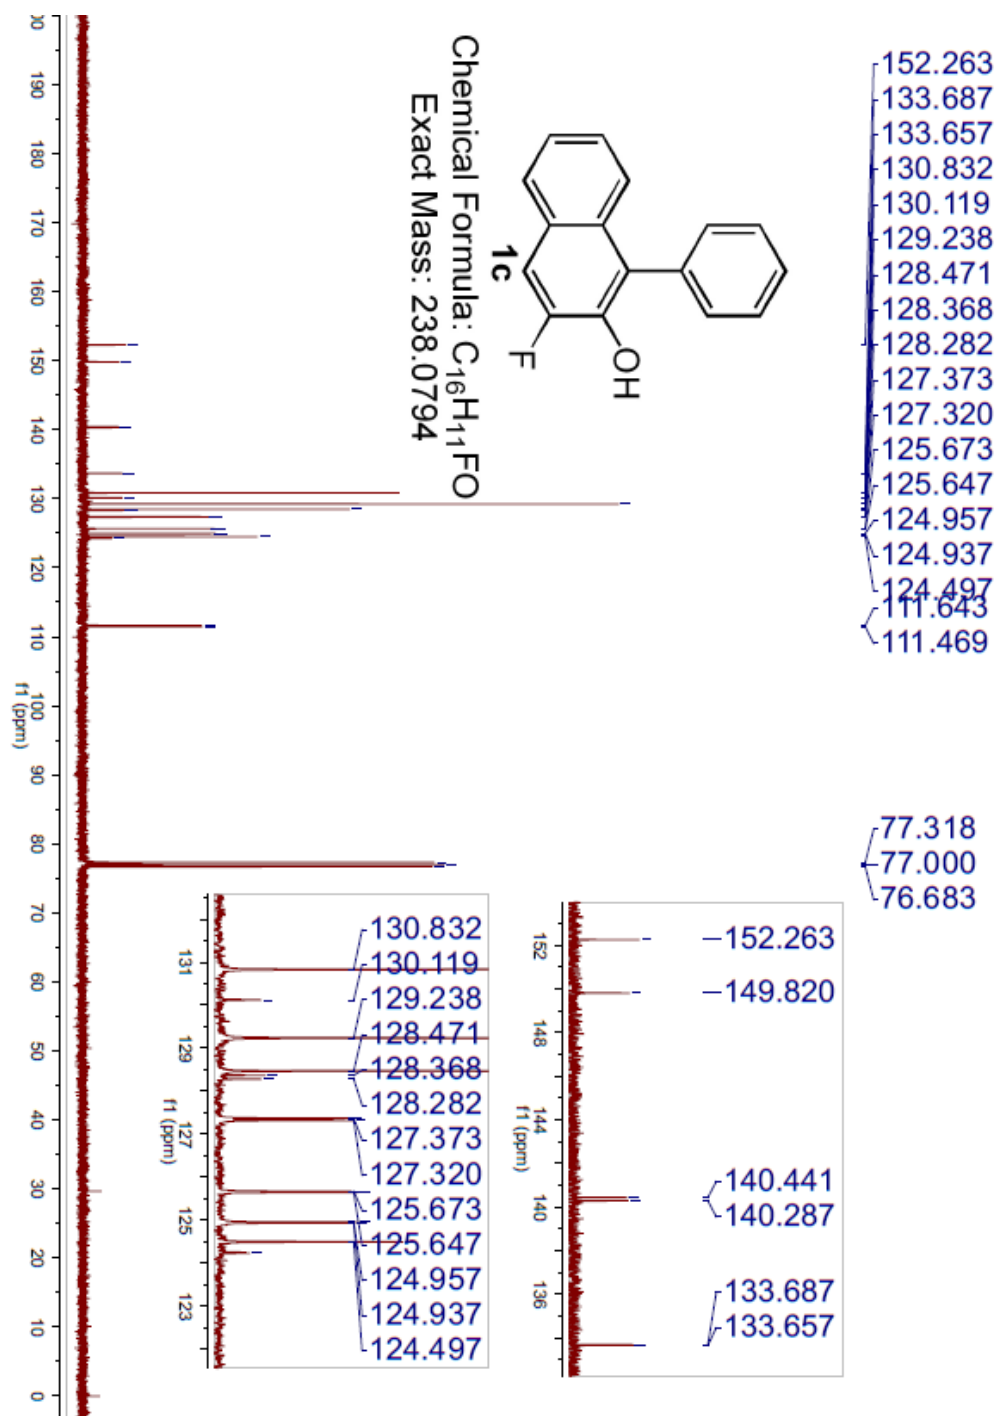

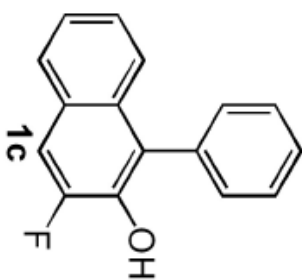

Chemical Formula:  $C_{16}H_{11}FO$   
Exact Mass: 238.0794

135.737  
135.744  
135.767  
135.774

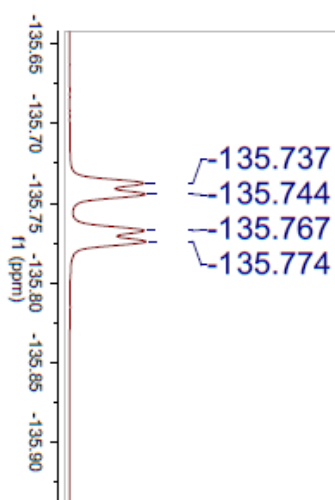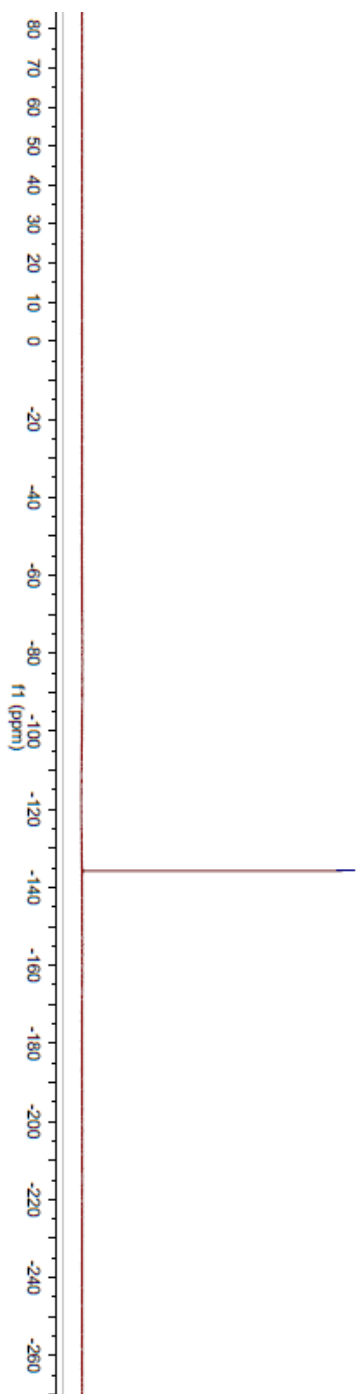



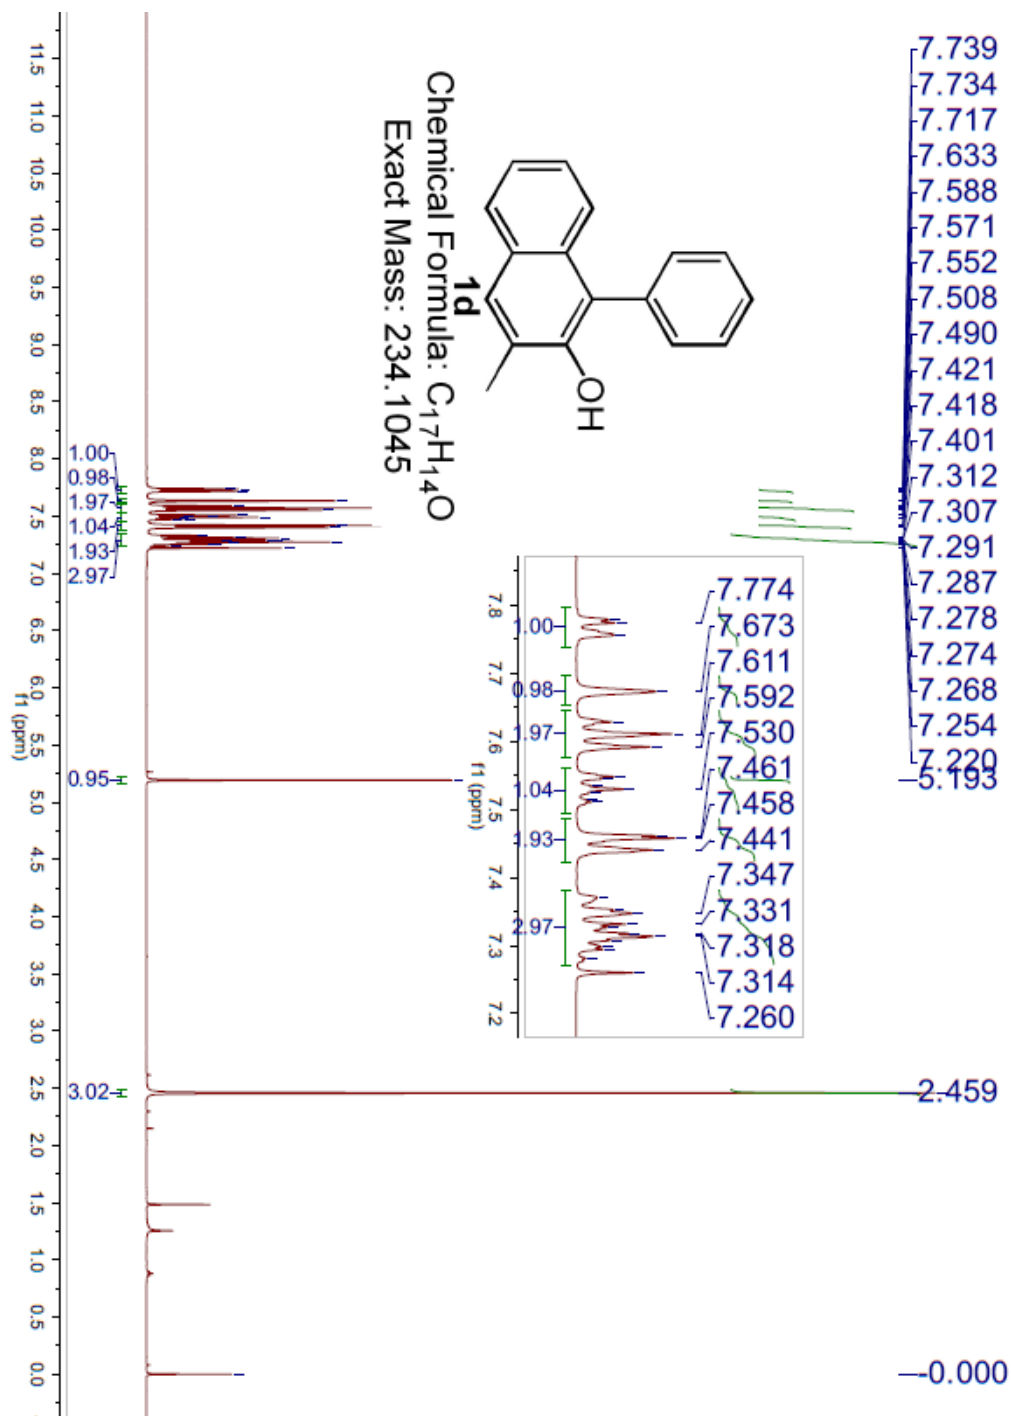

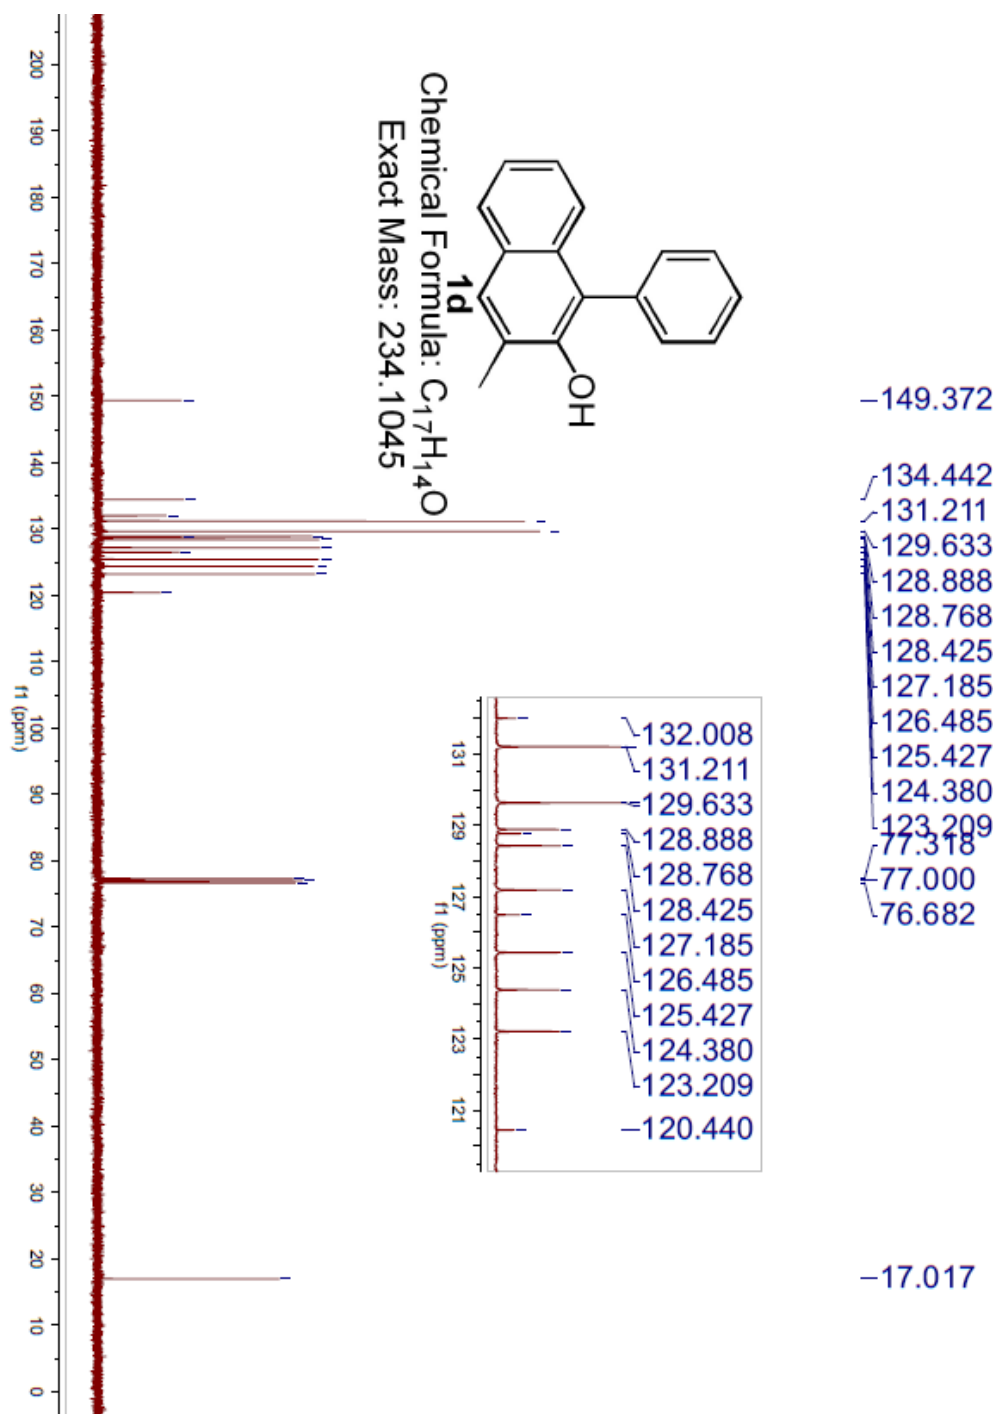

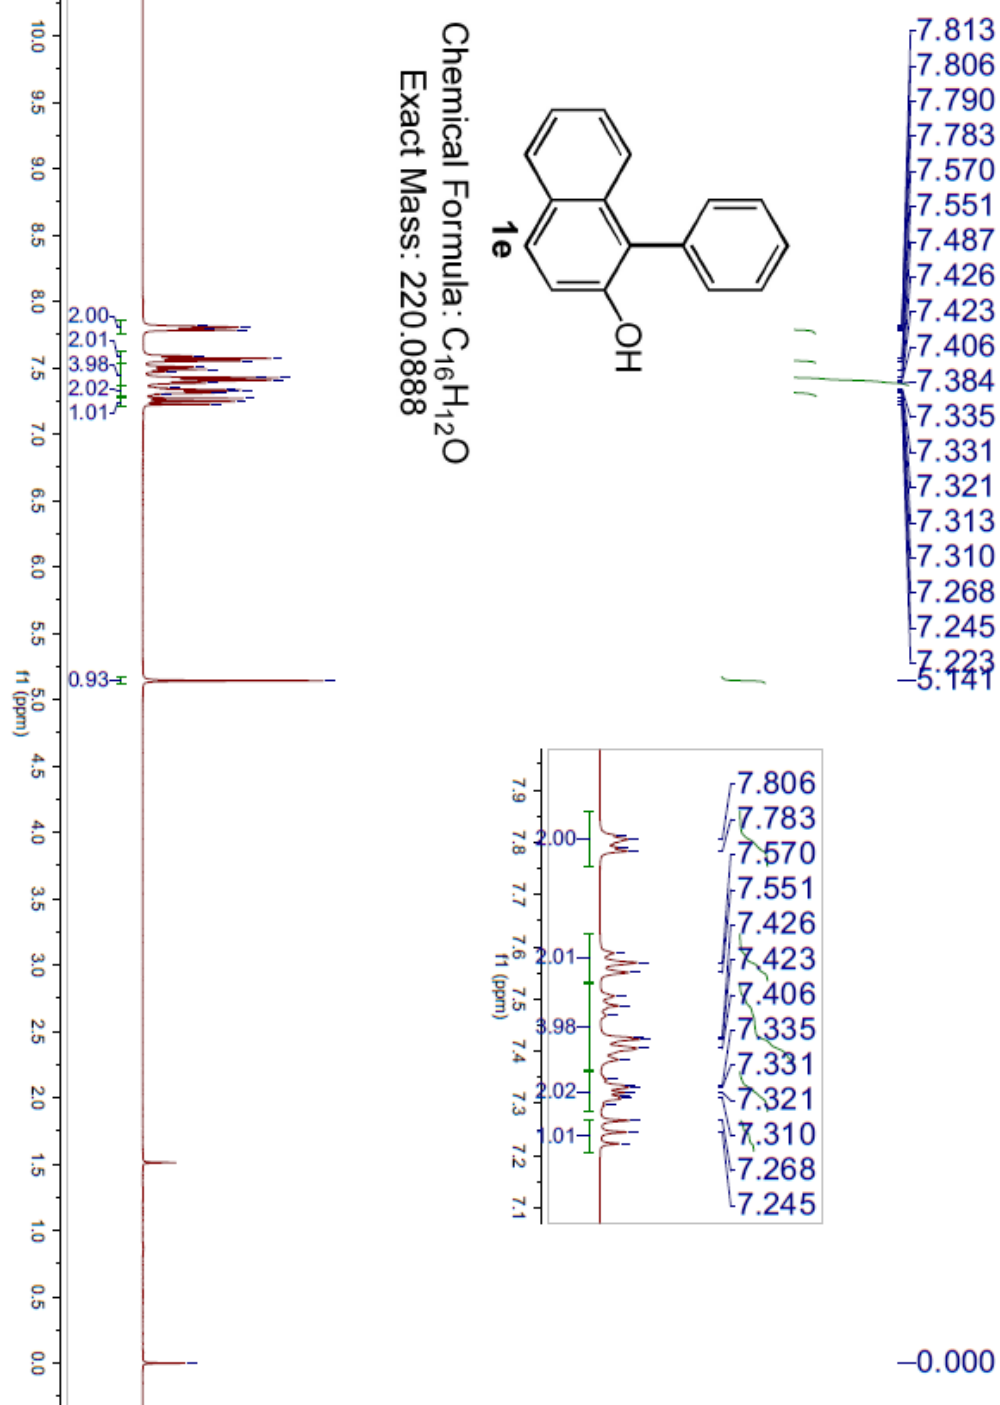

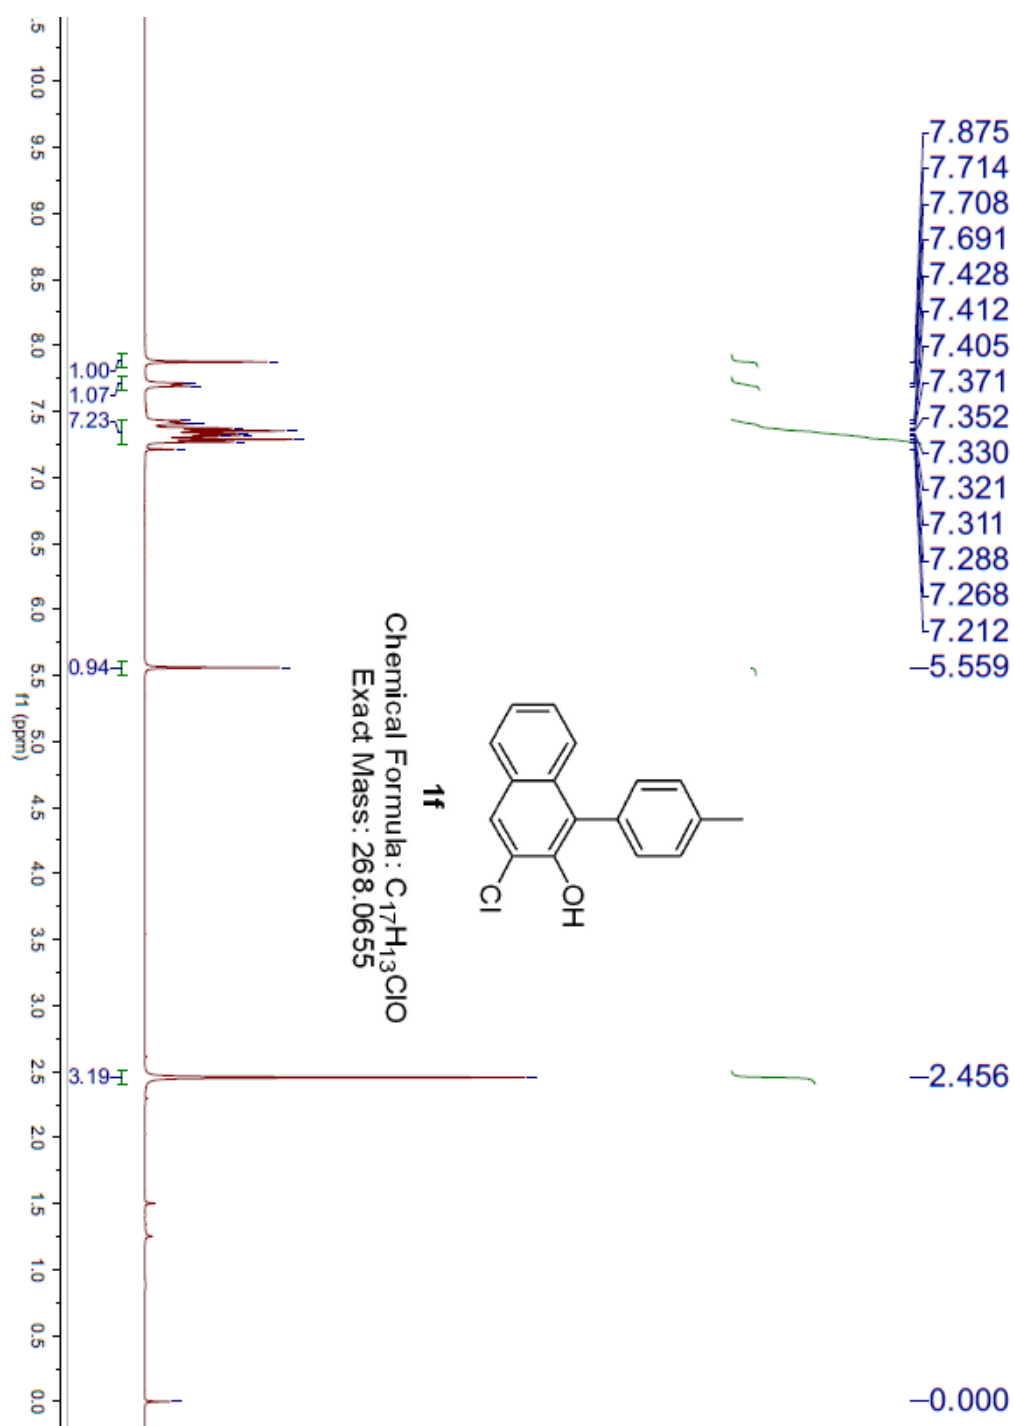

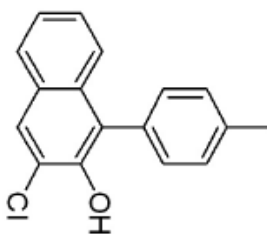

**1f**

Chemical Formula: C<sub>17</sub>H<sub>13</sub>ClO  
Exact Mass: 268.0655

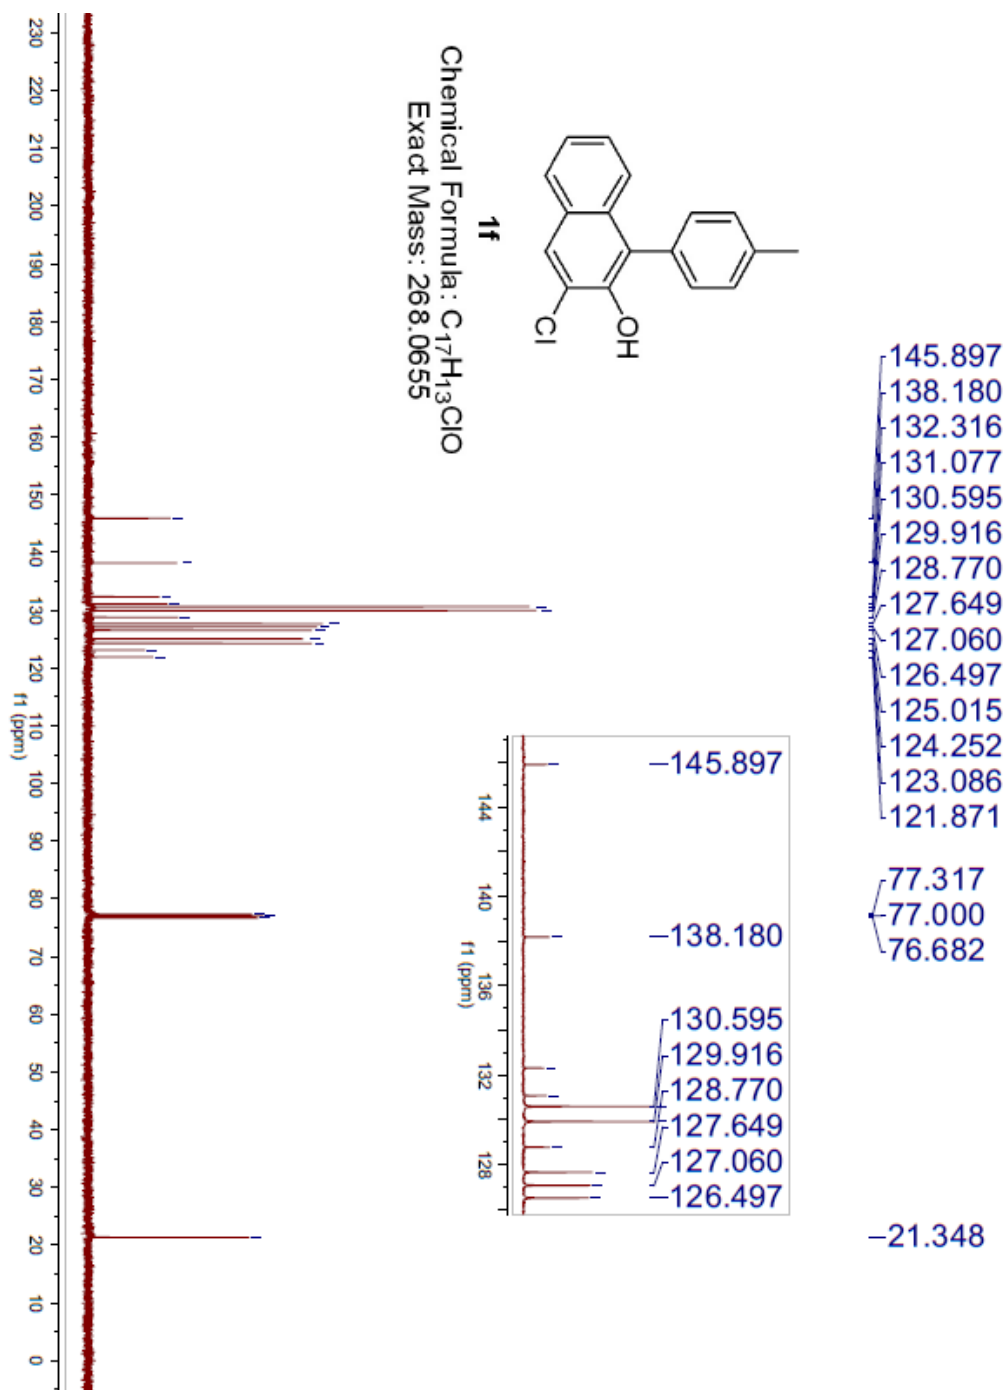

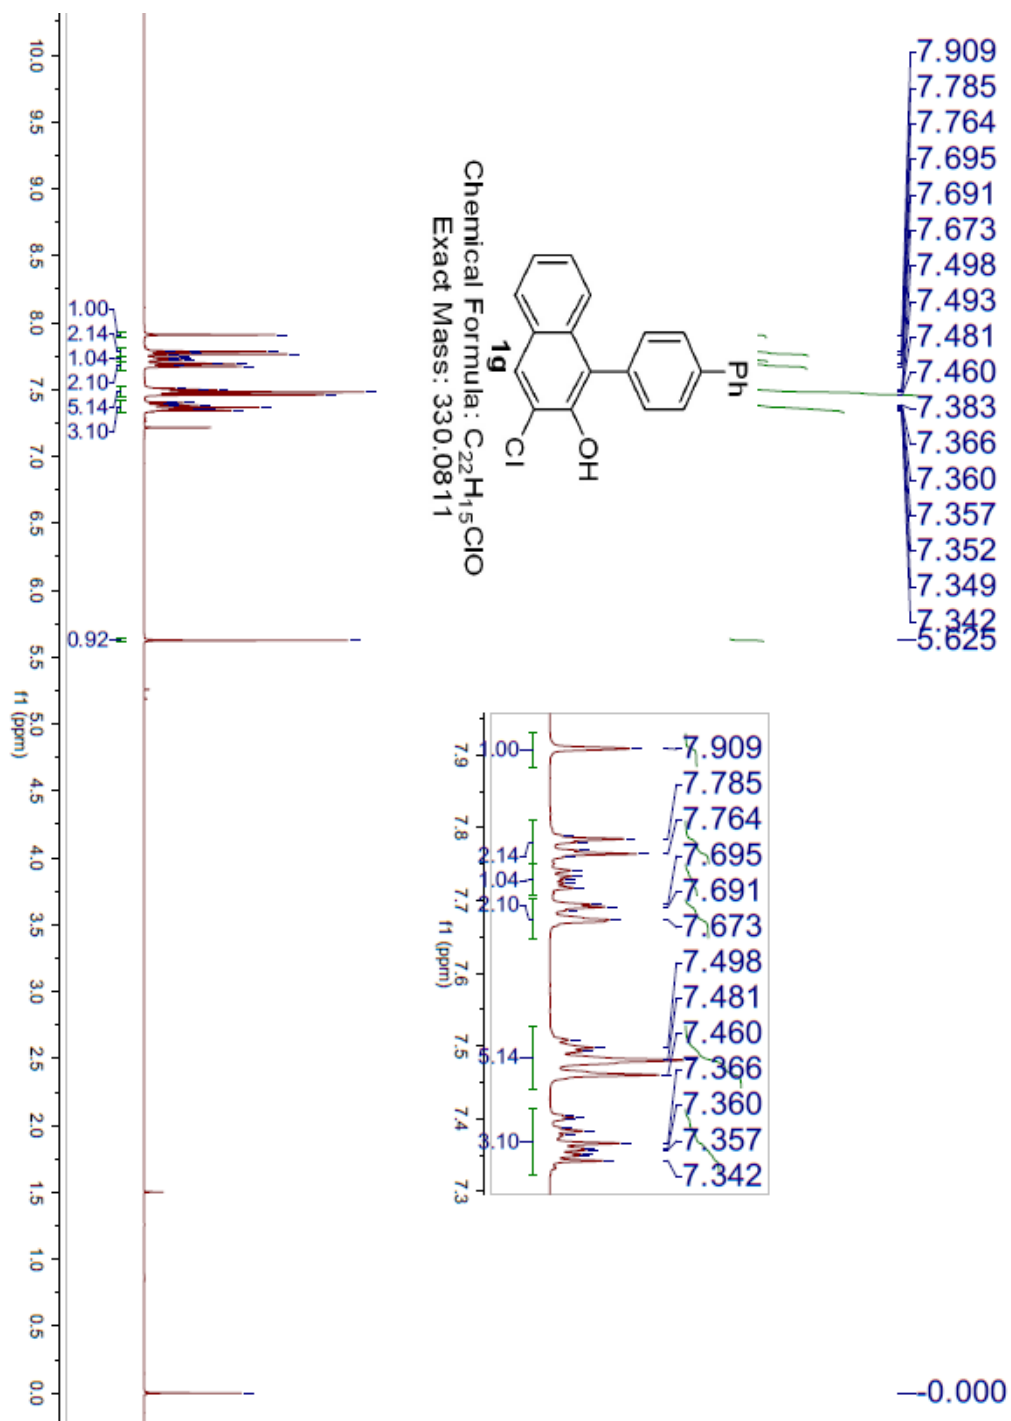

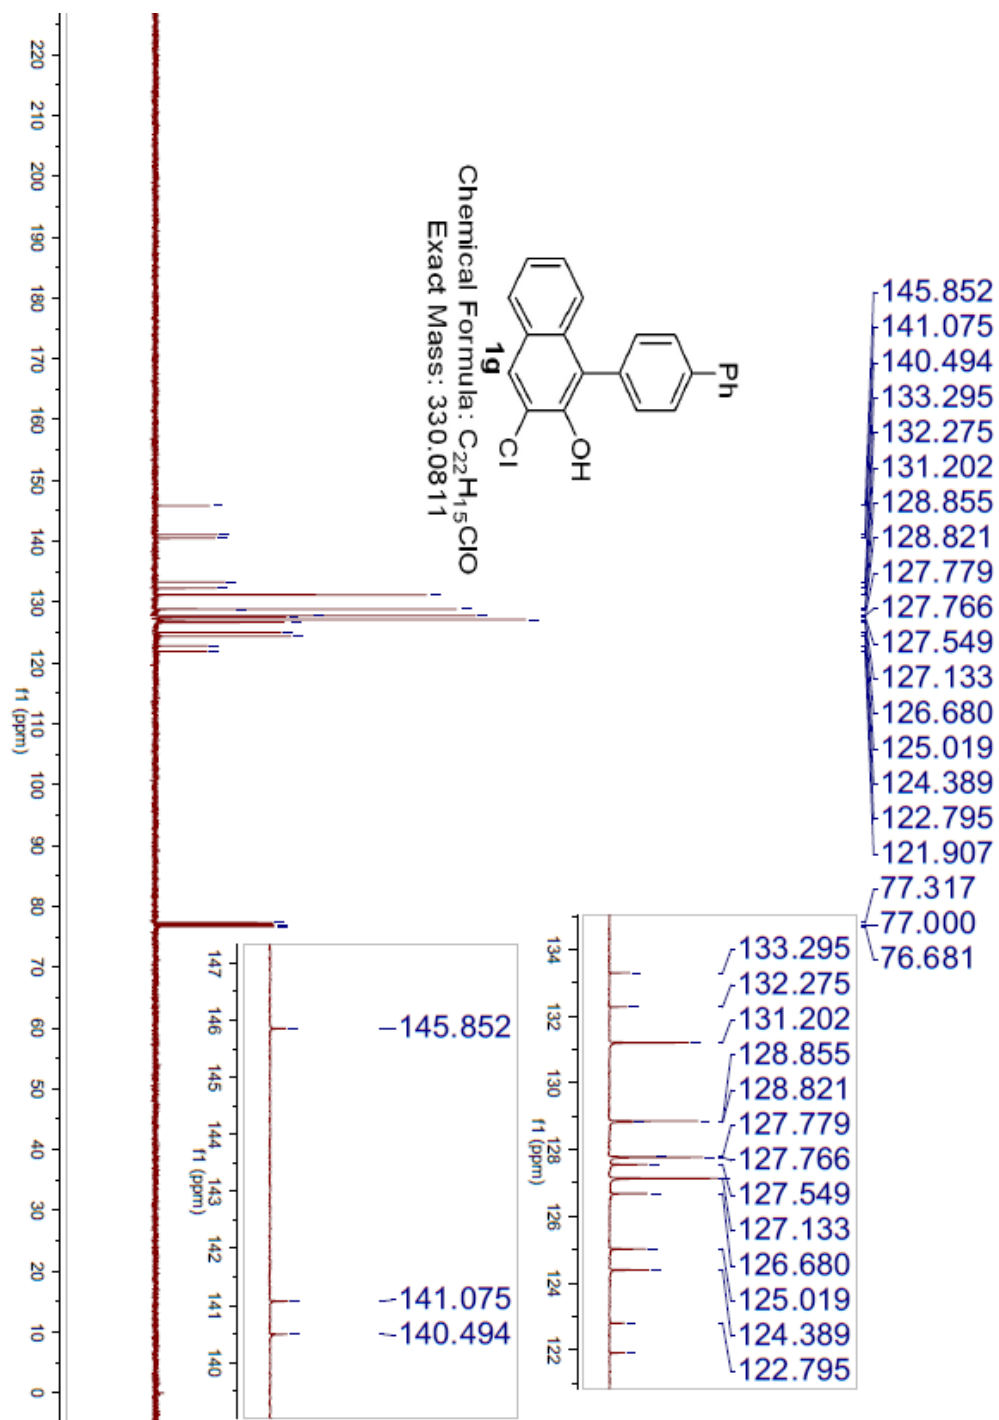

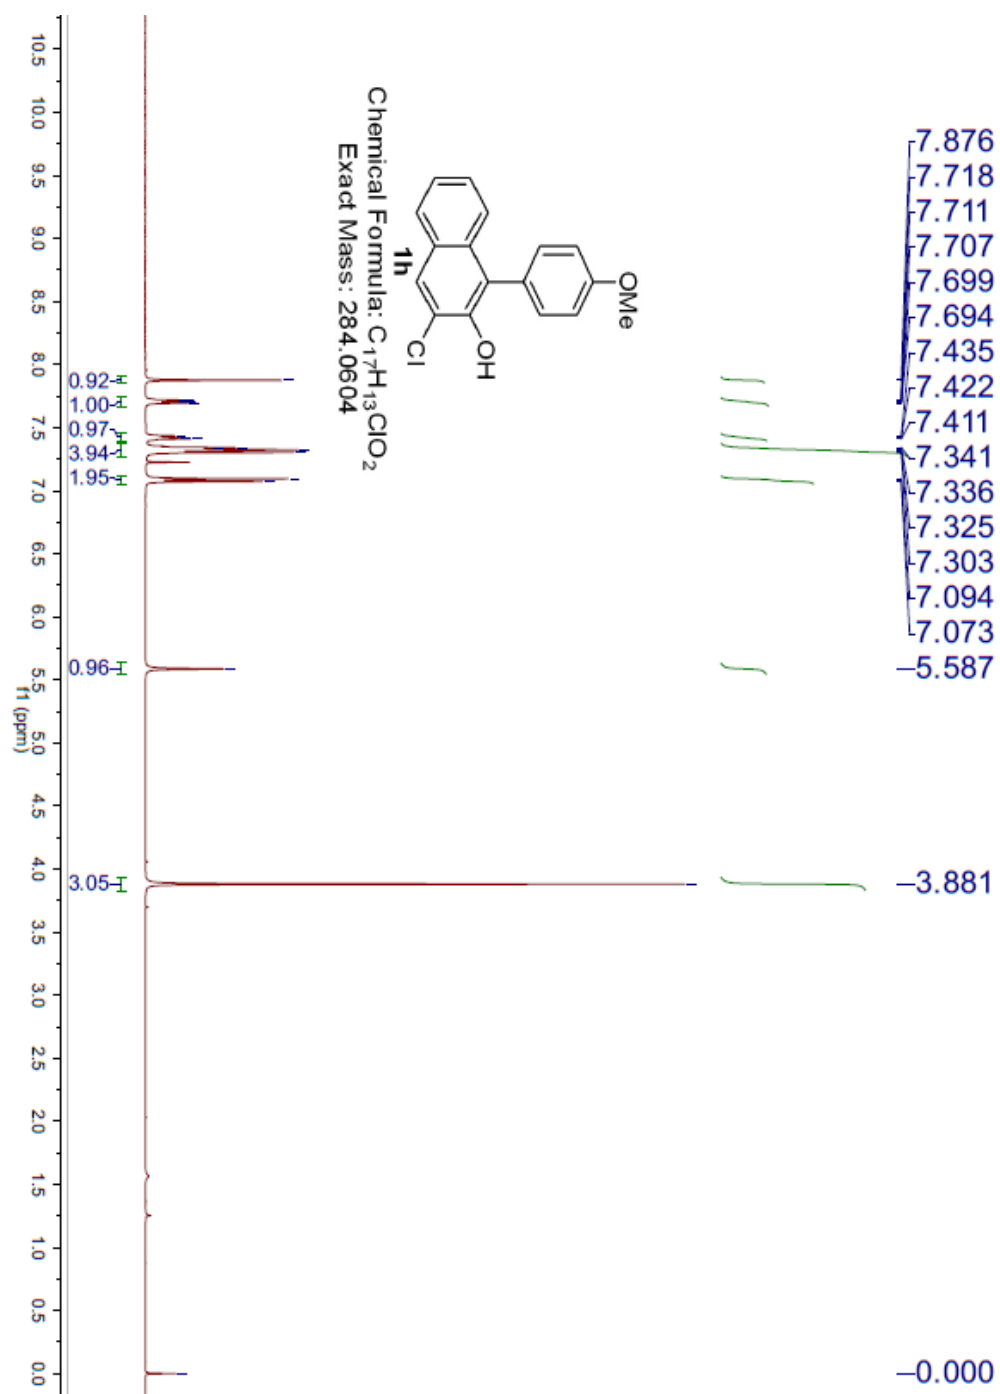



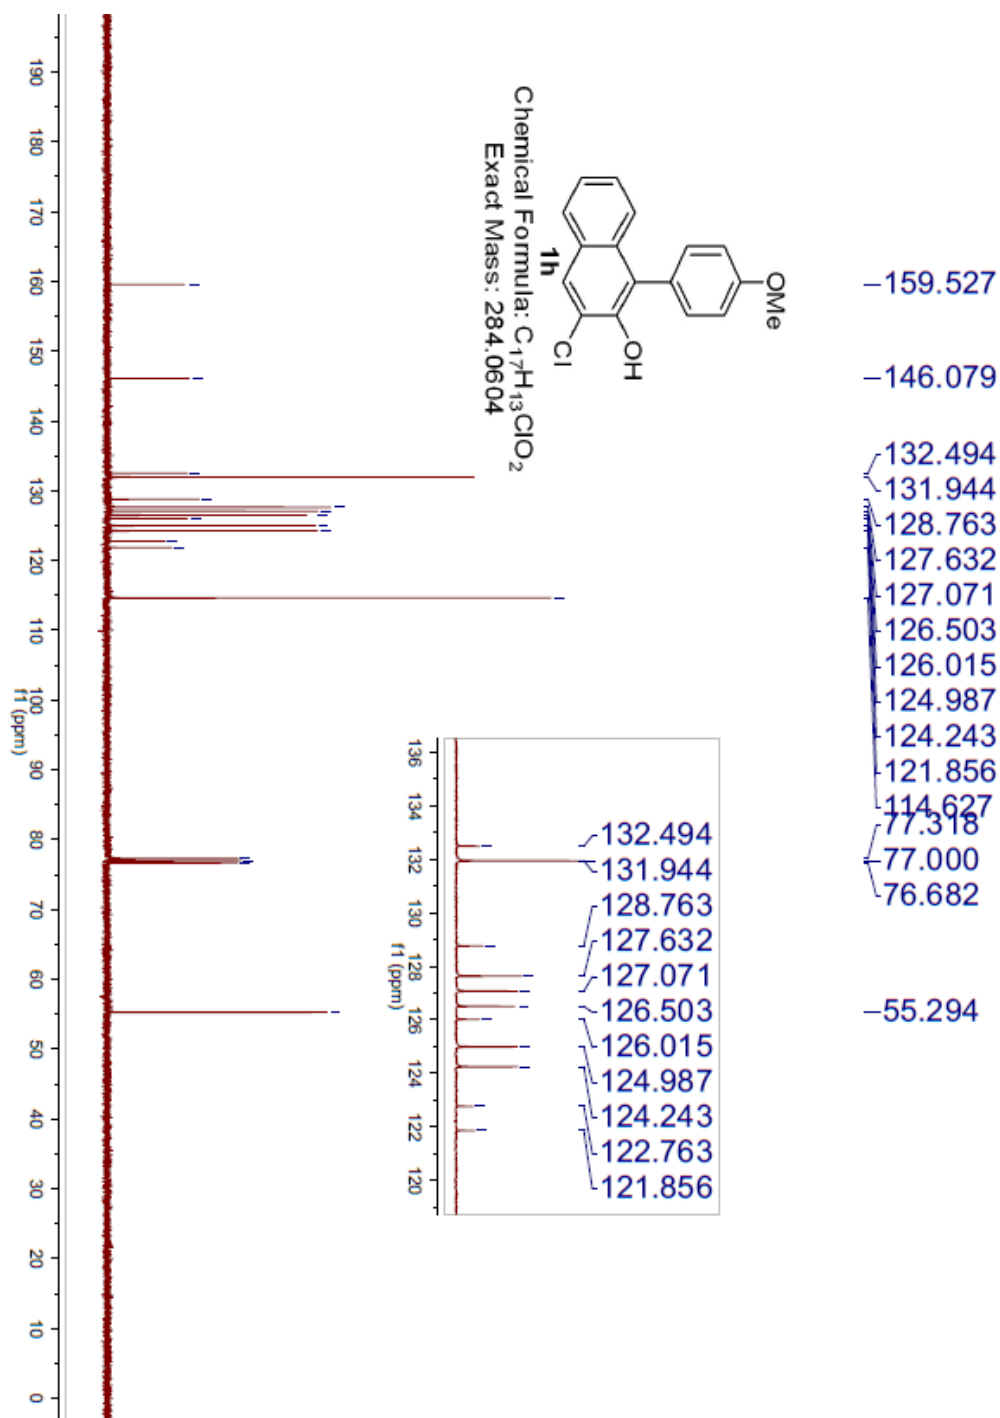

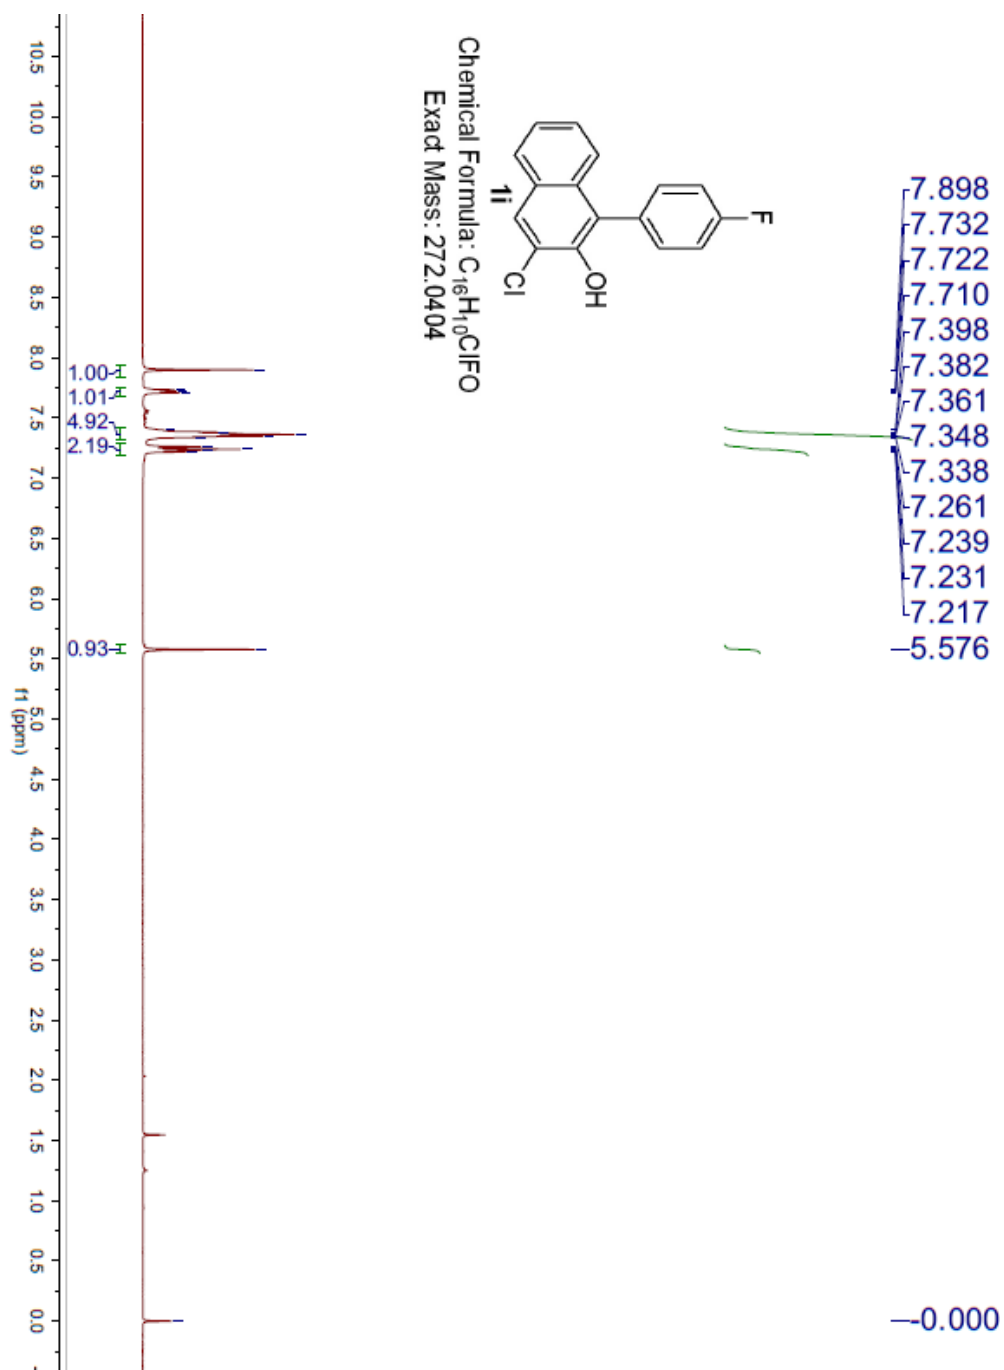

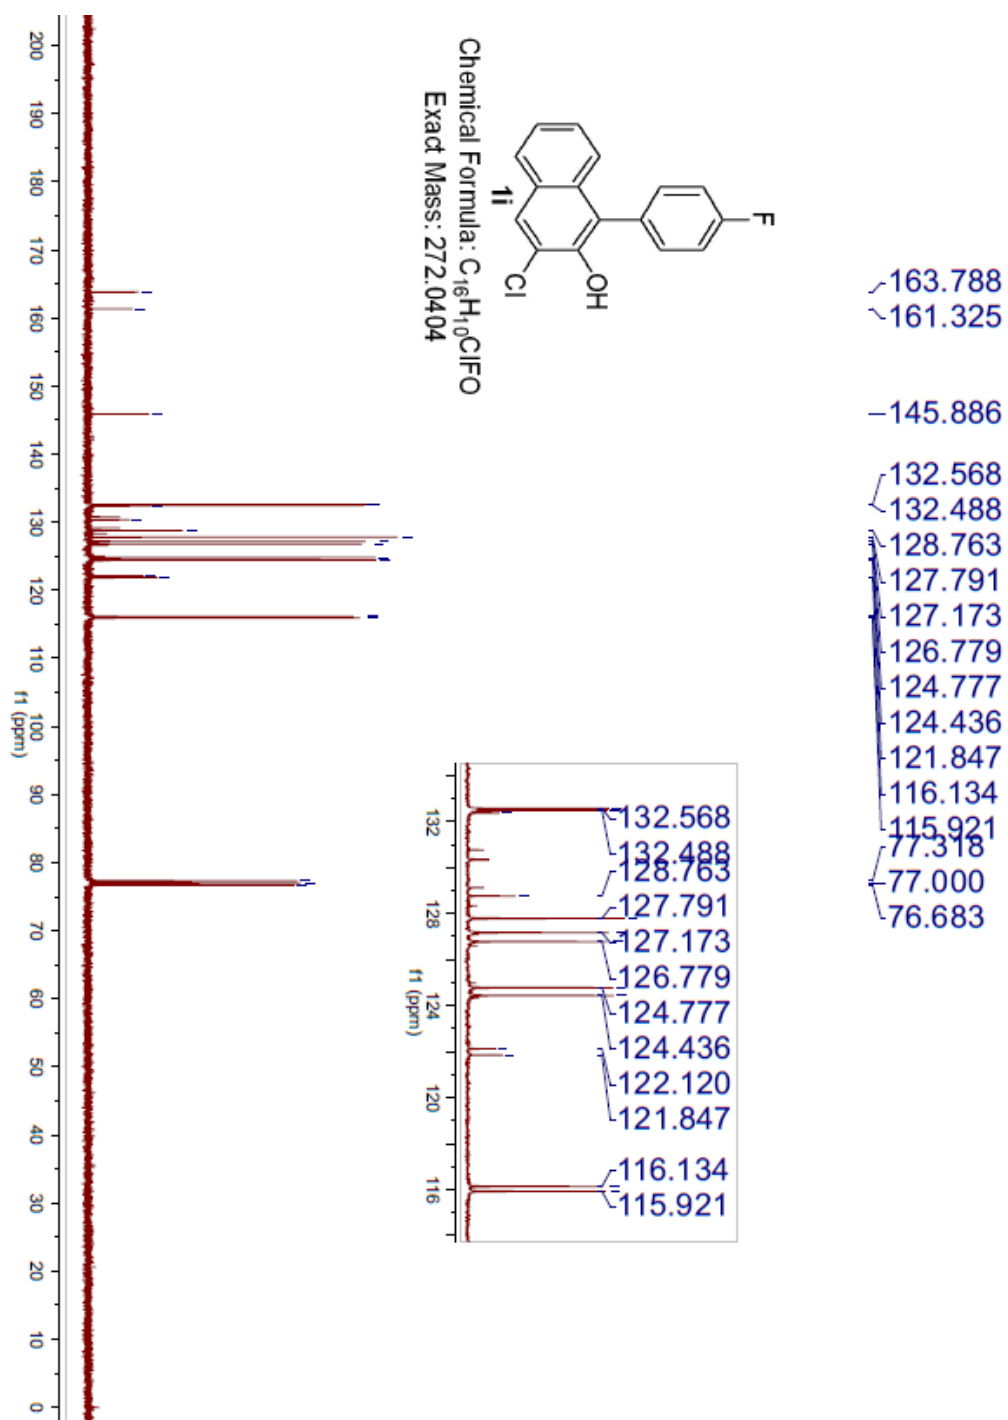

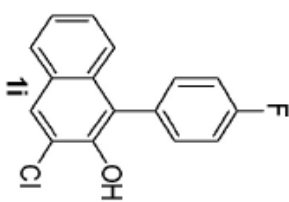

Chemical Formula:  $C_{16}H_{10}ClFO$   
Exact Mass: 272.0404

113.485  
113.499  
113.508  
113.522  
113.536  
113.545  
113.560

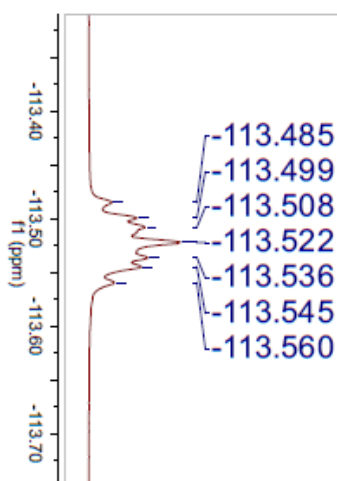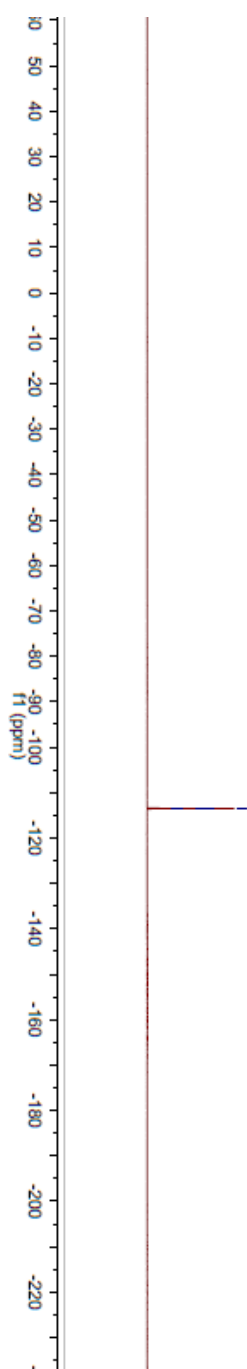

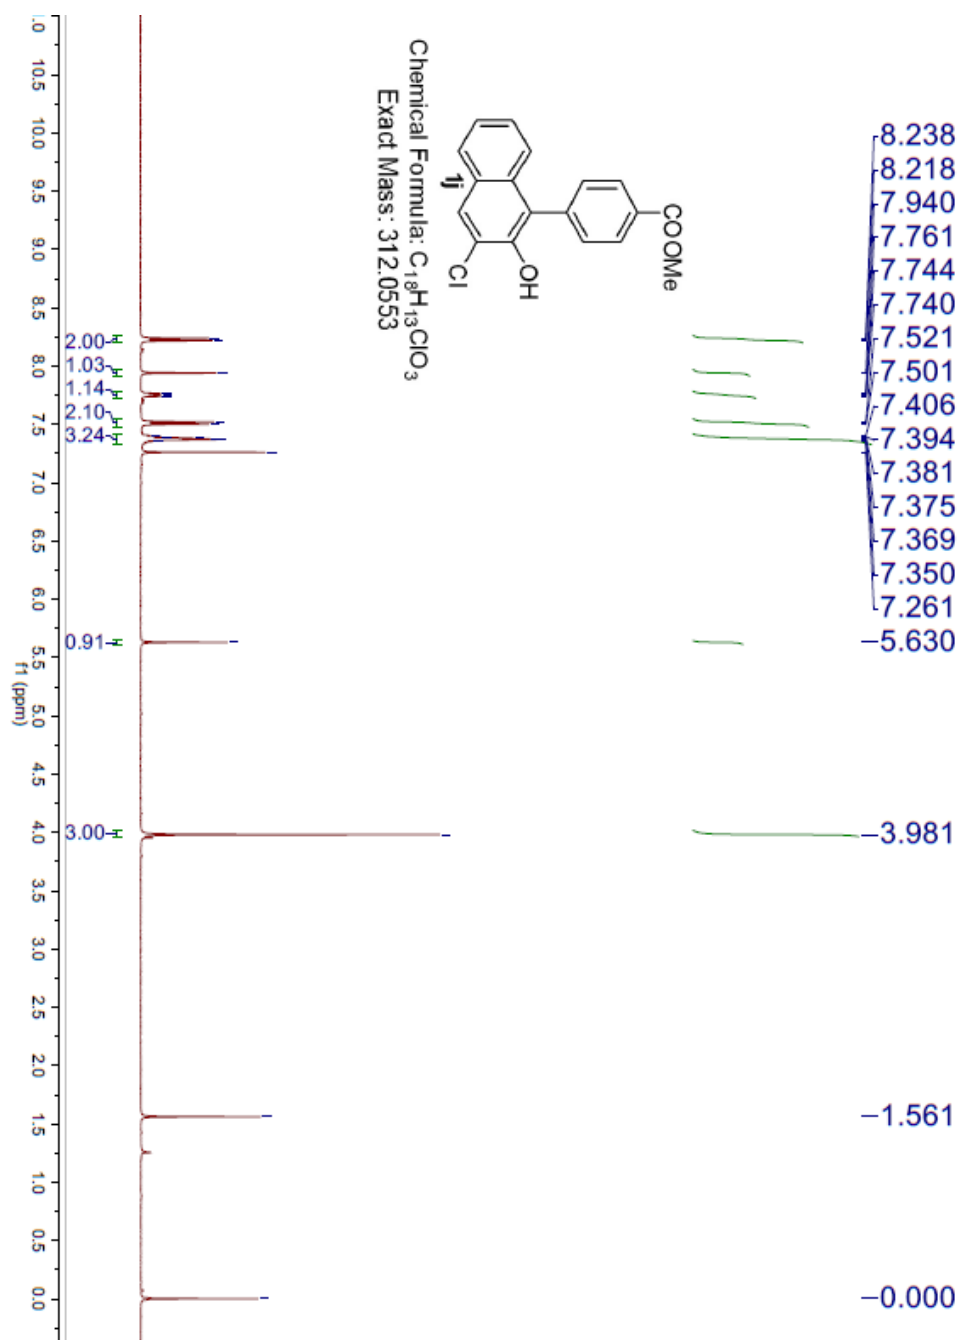

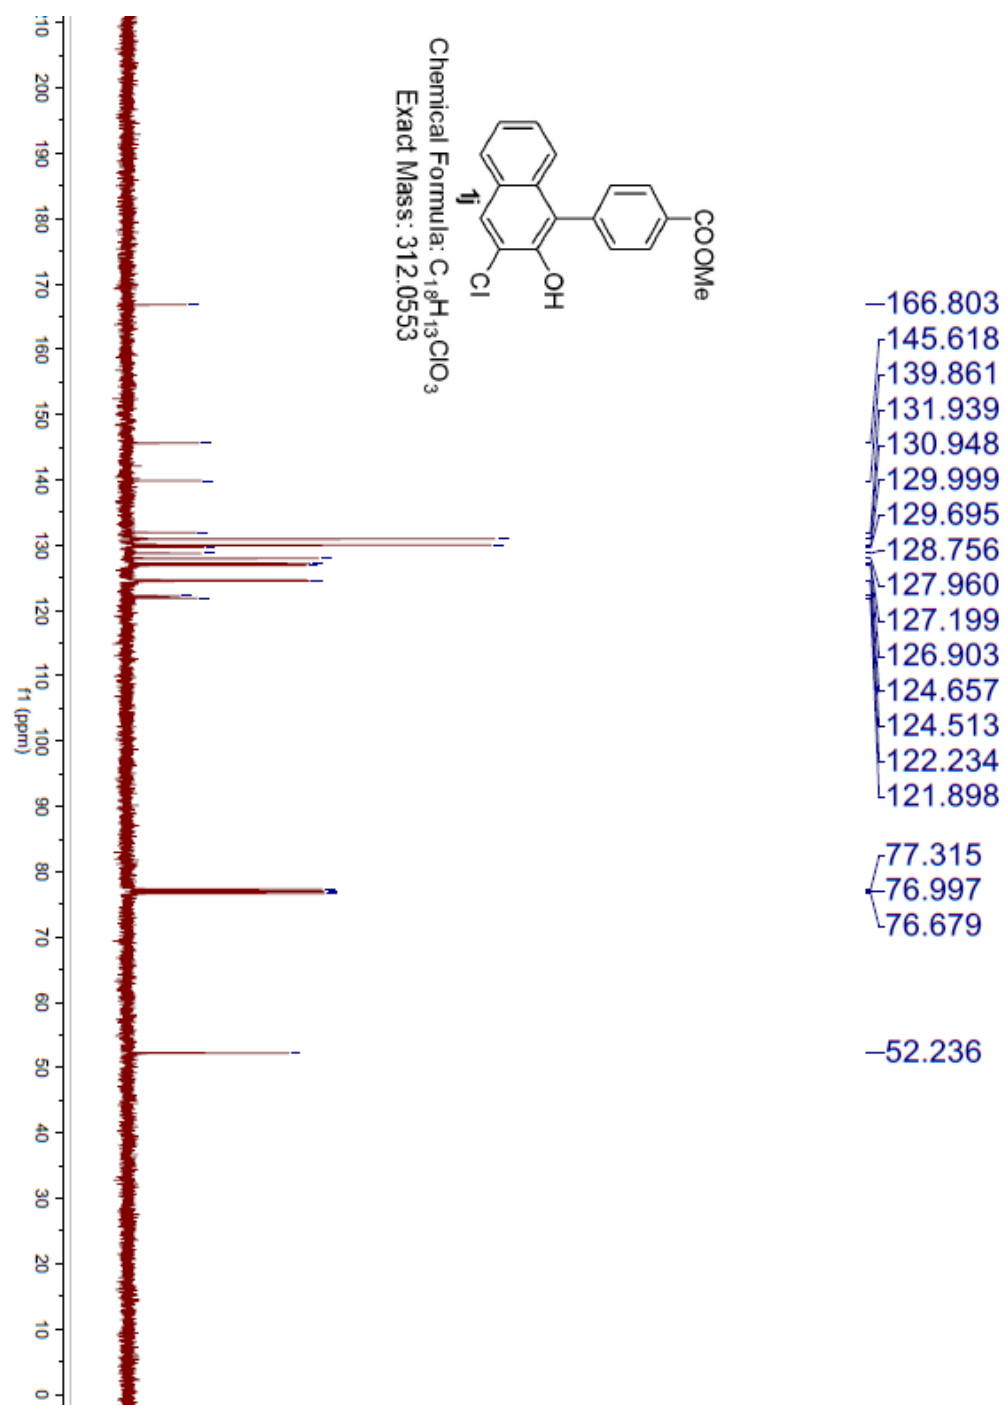

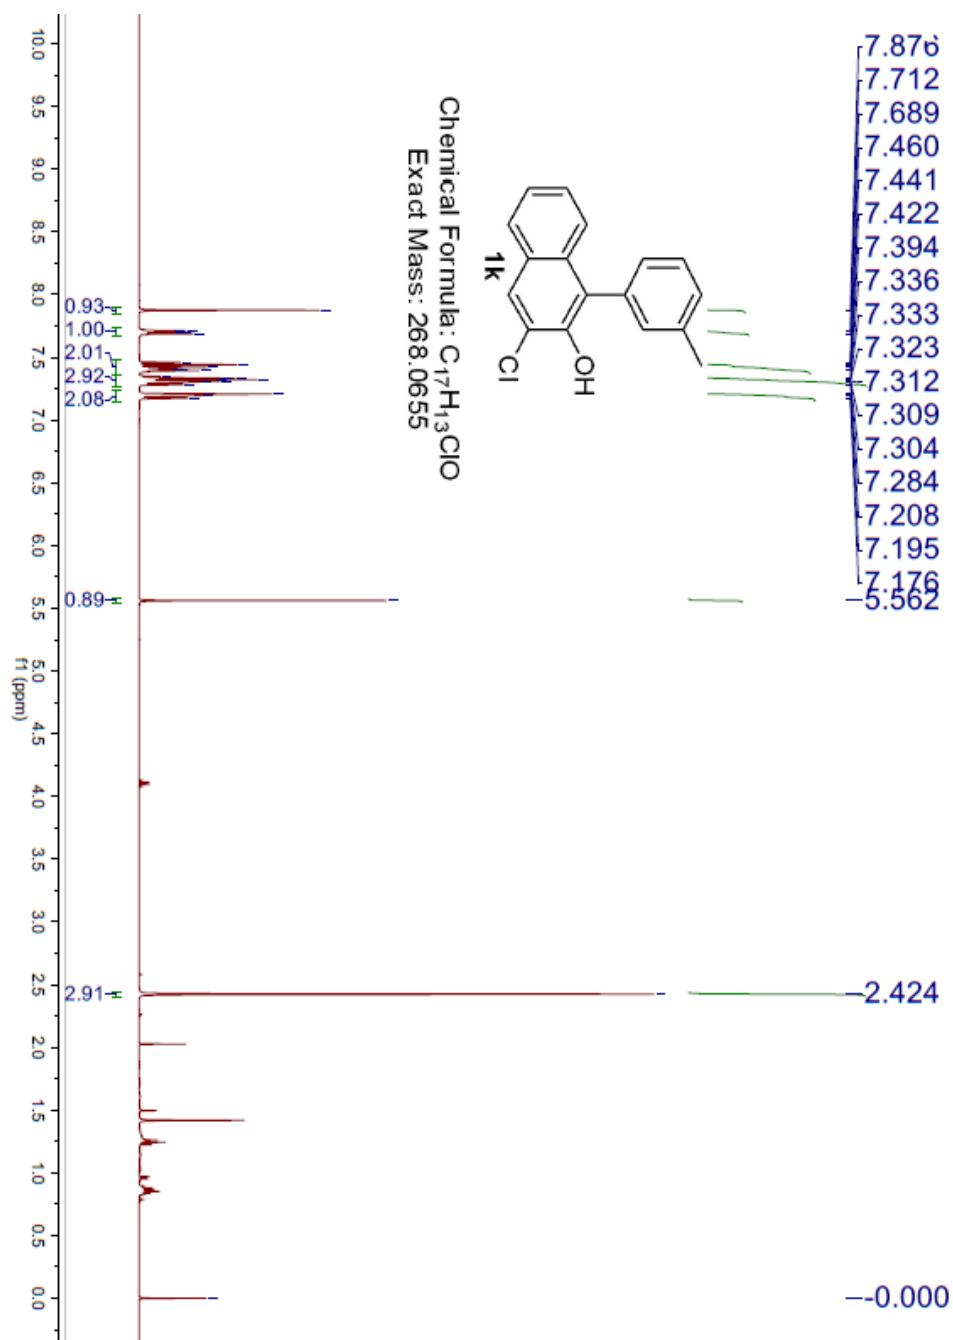

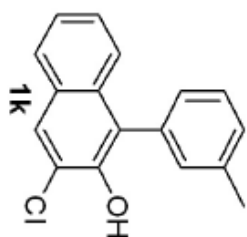

Chemical Formula: C<sub>17</sub>H<sub>13</sub>ClO  
Exact Mass: 268.0655

145.801  
138.941  
134.105  
132.199  
131.304  
129.157  
129.084  
128.752  
127.721  
127.705  
127.047  
126.514  
125.016  
124.261  
123.215  
121.883

77.318  
77.000  
76.682

-21.465

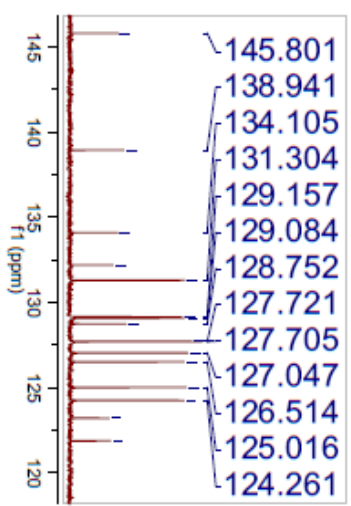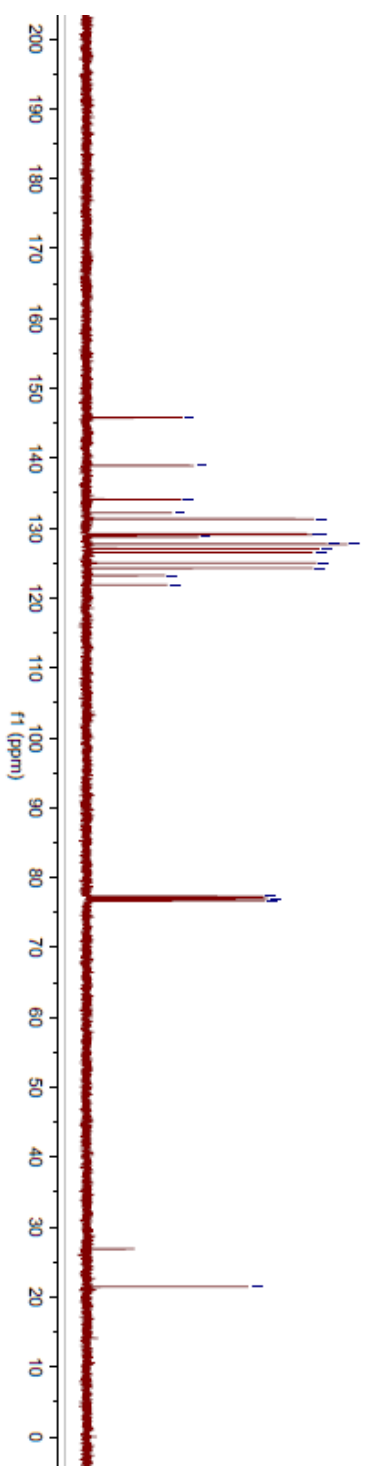



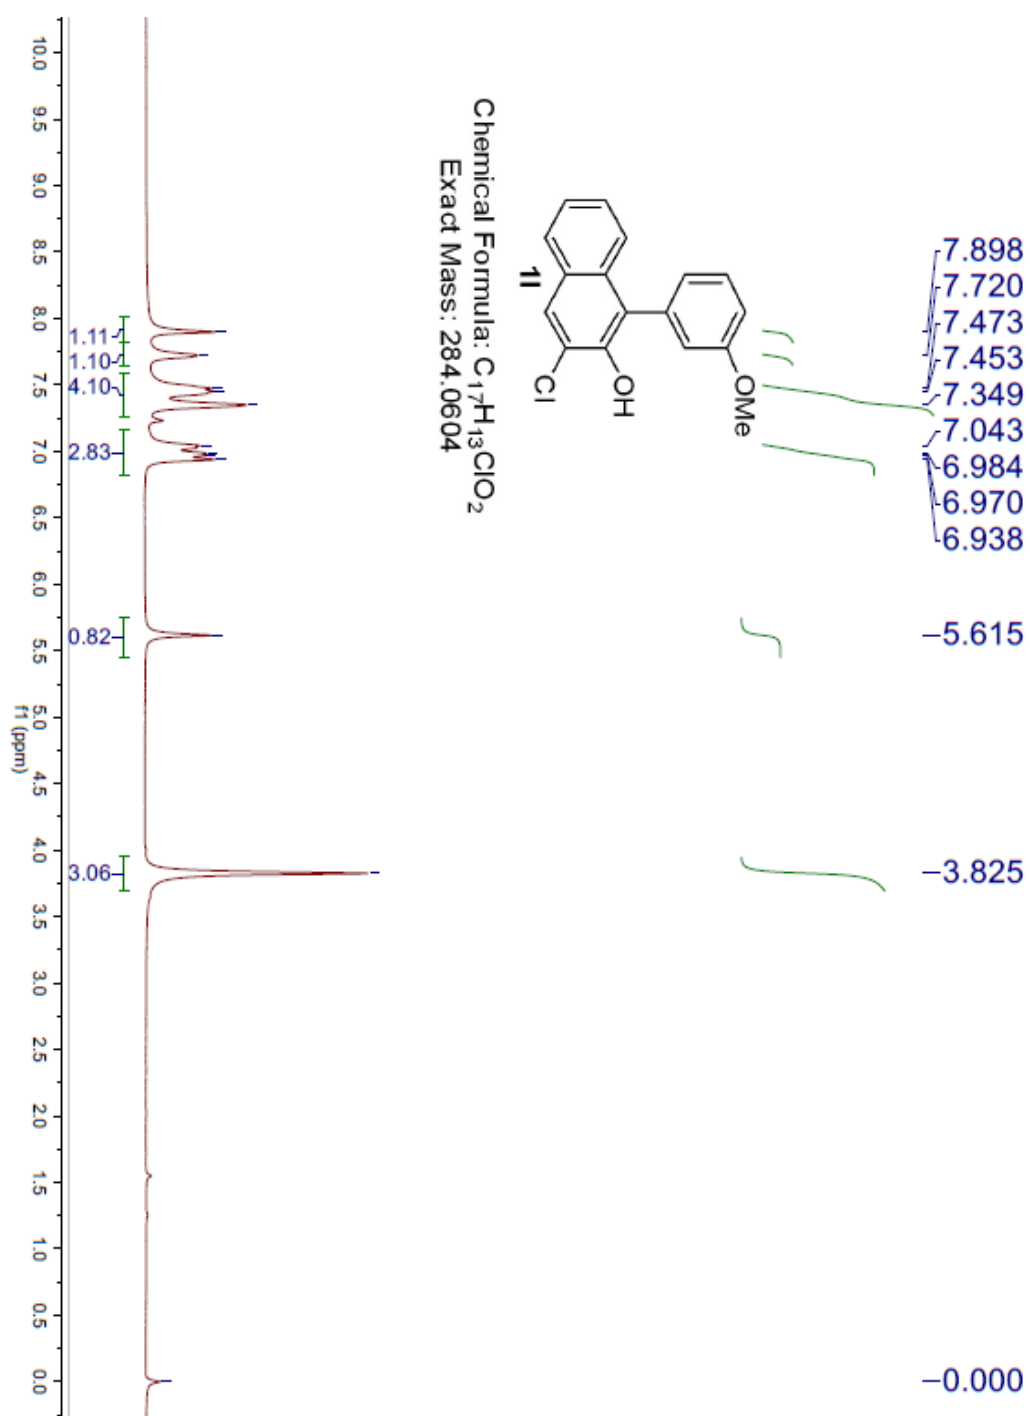

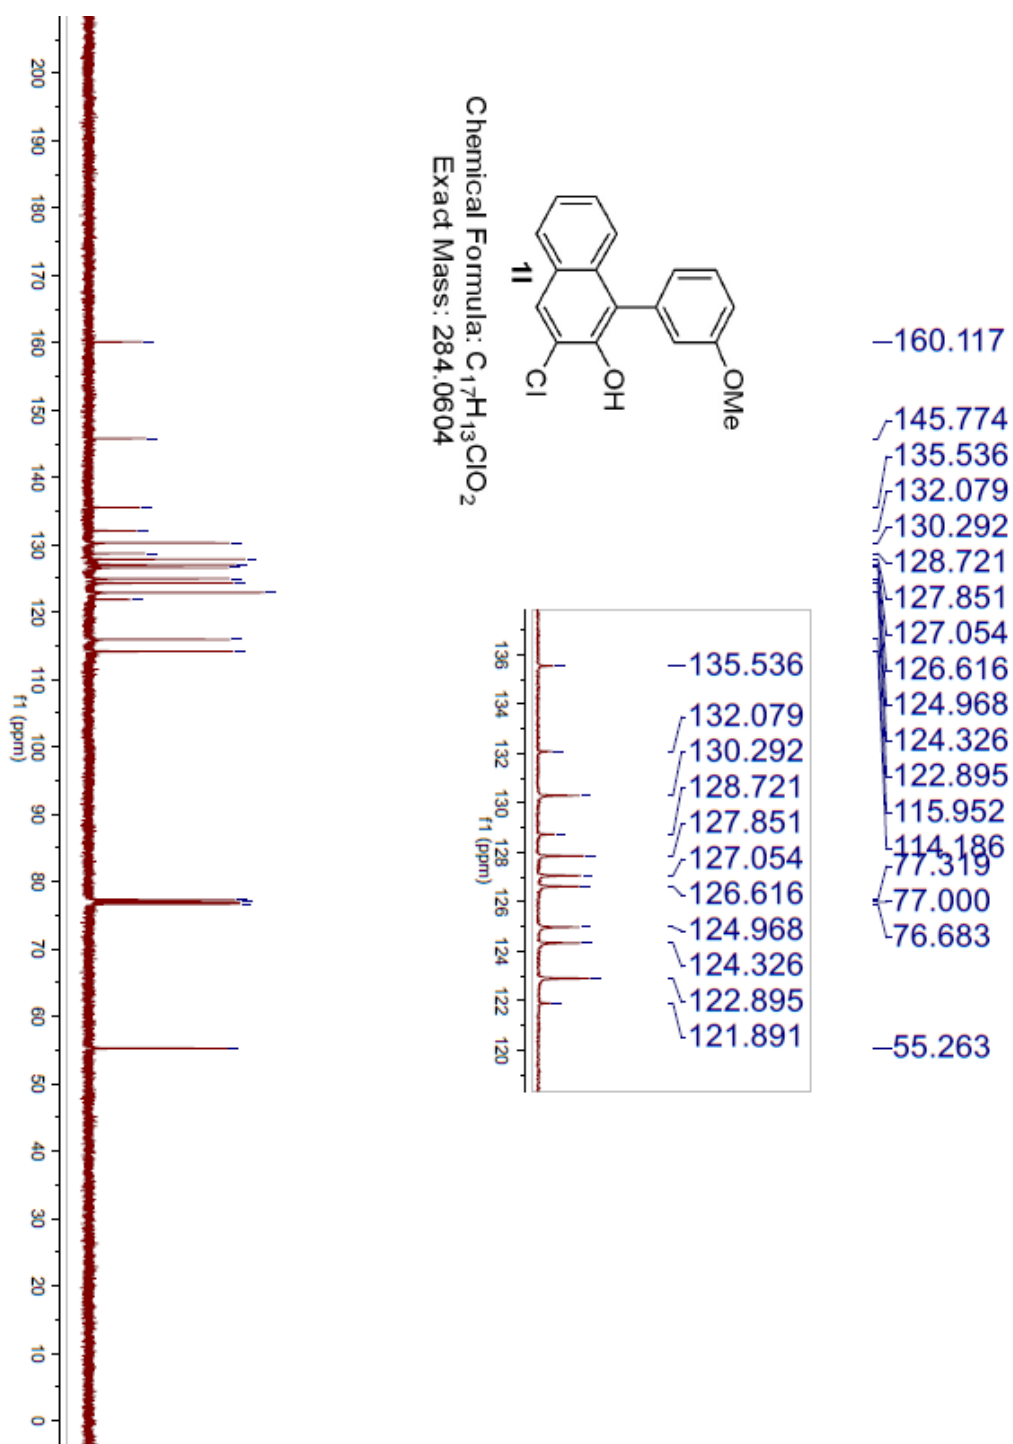

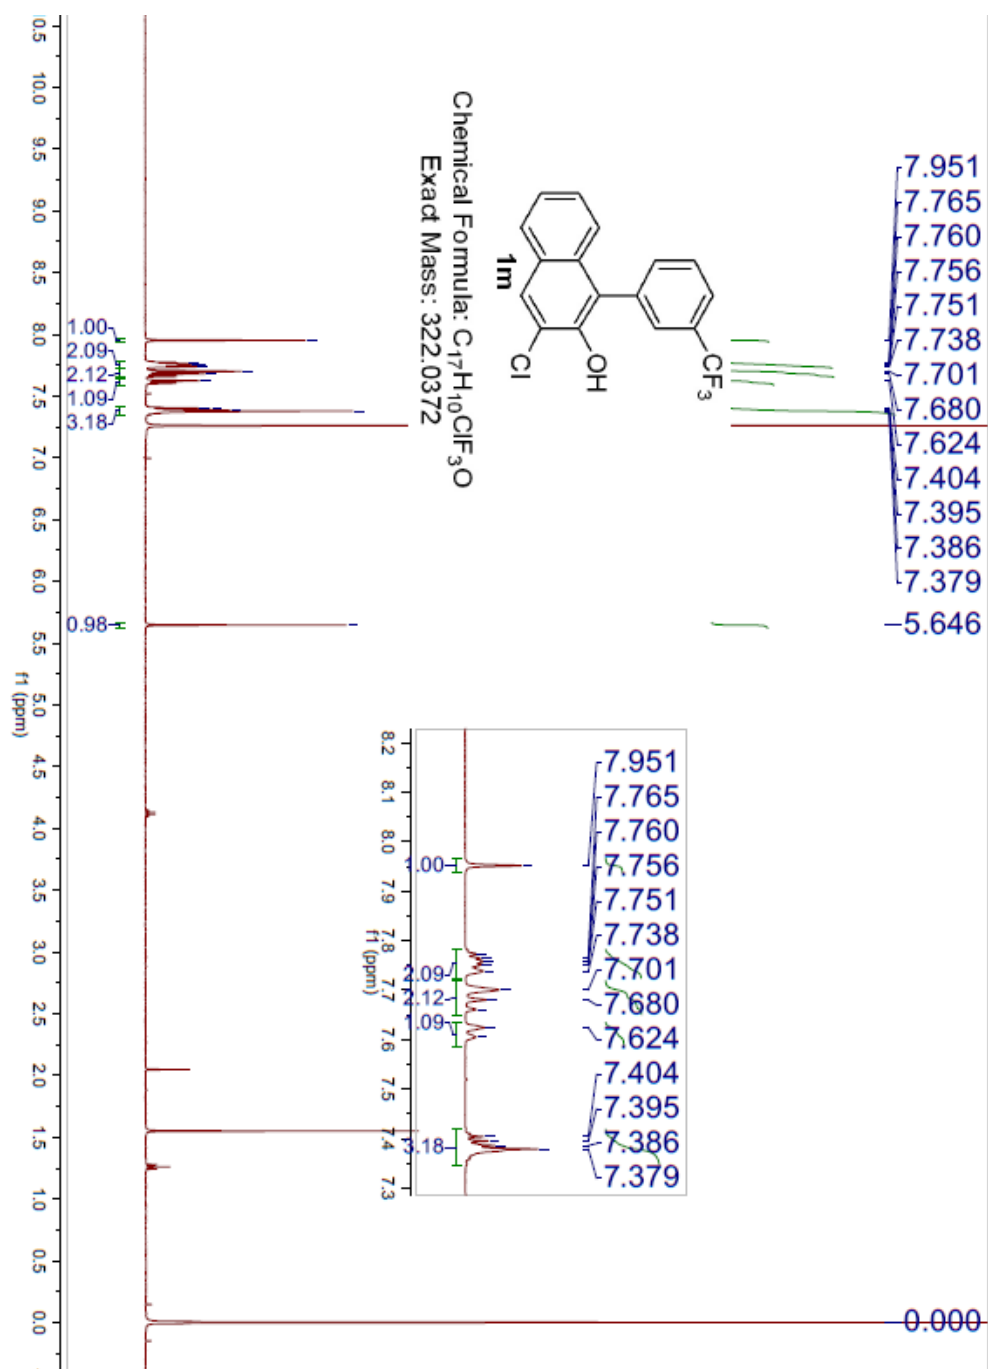

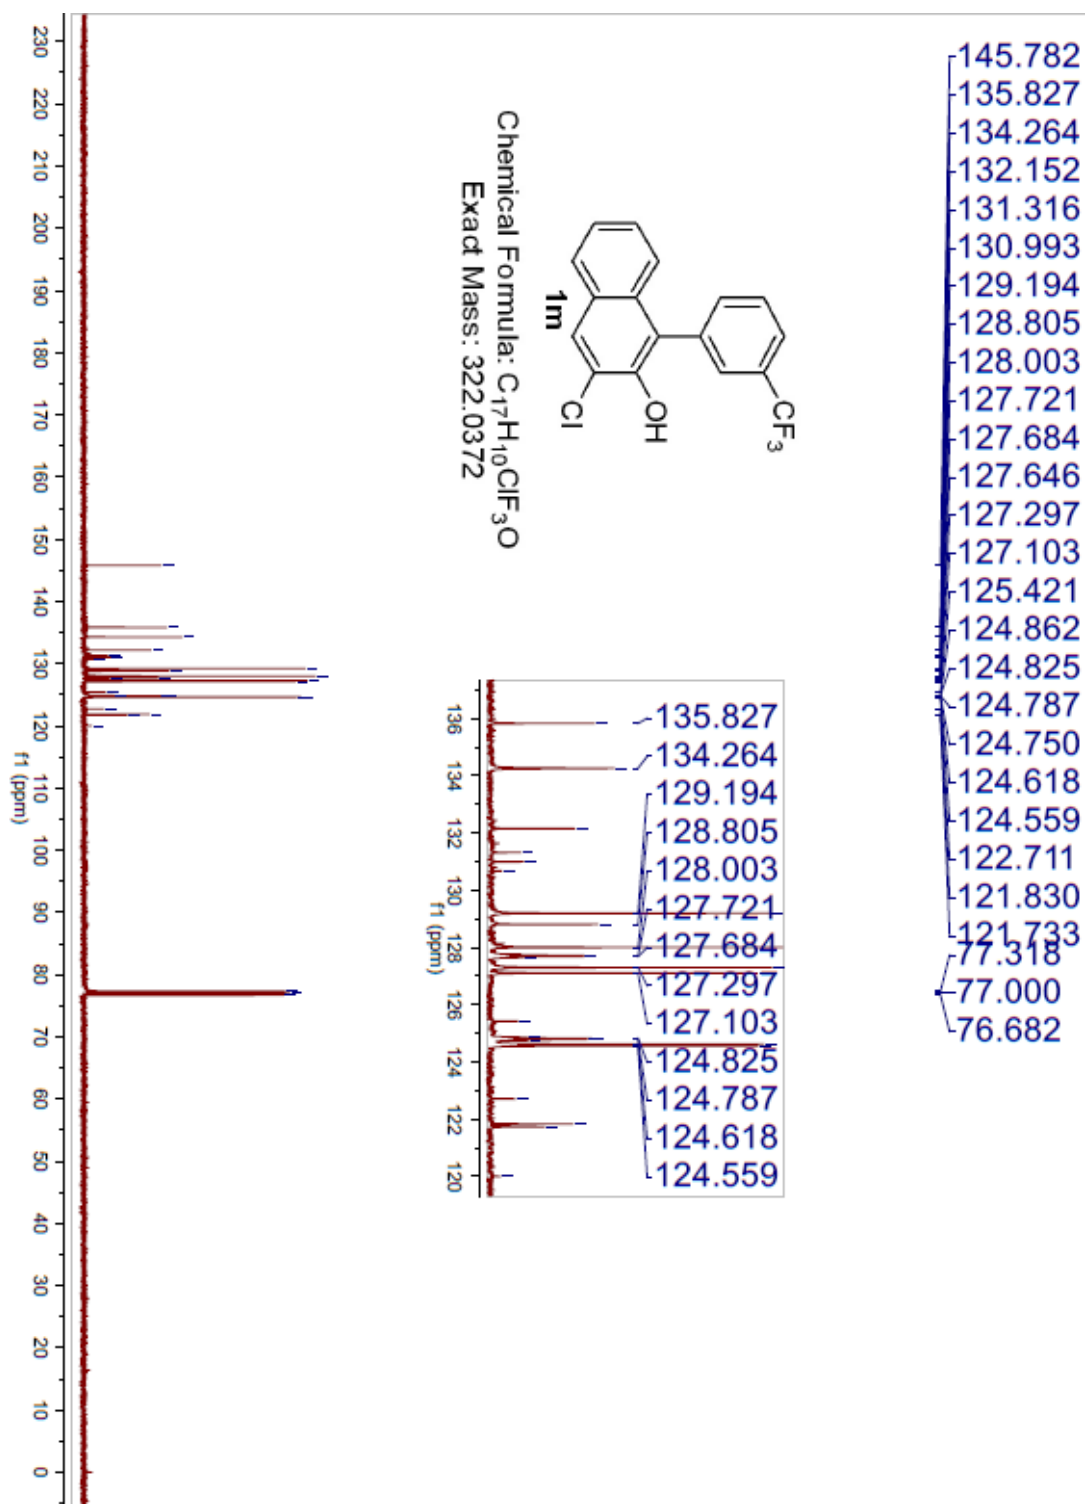

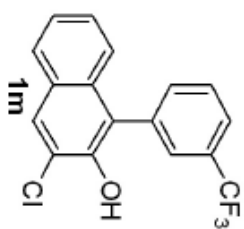

Chemical Formula:  $C_{17}H_{10}ClF_3O$   
Exact Mass: 322.0372

—62.527

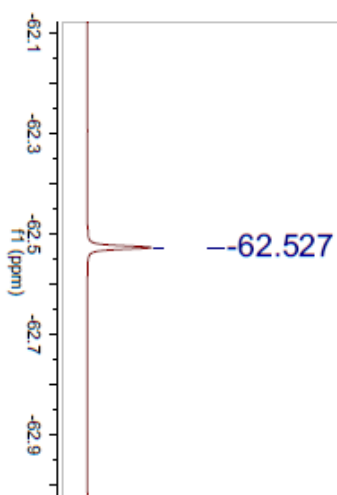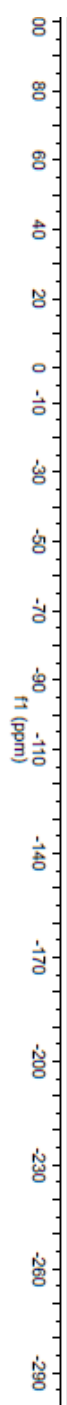

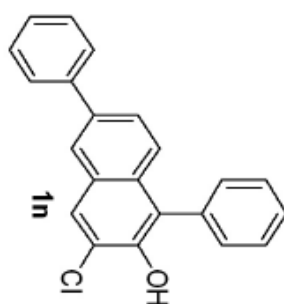

Chemical Formula: C<sub>22</sub>H<sub>15</sub>ClO  
Exact Mass: 330.0811

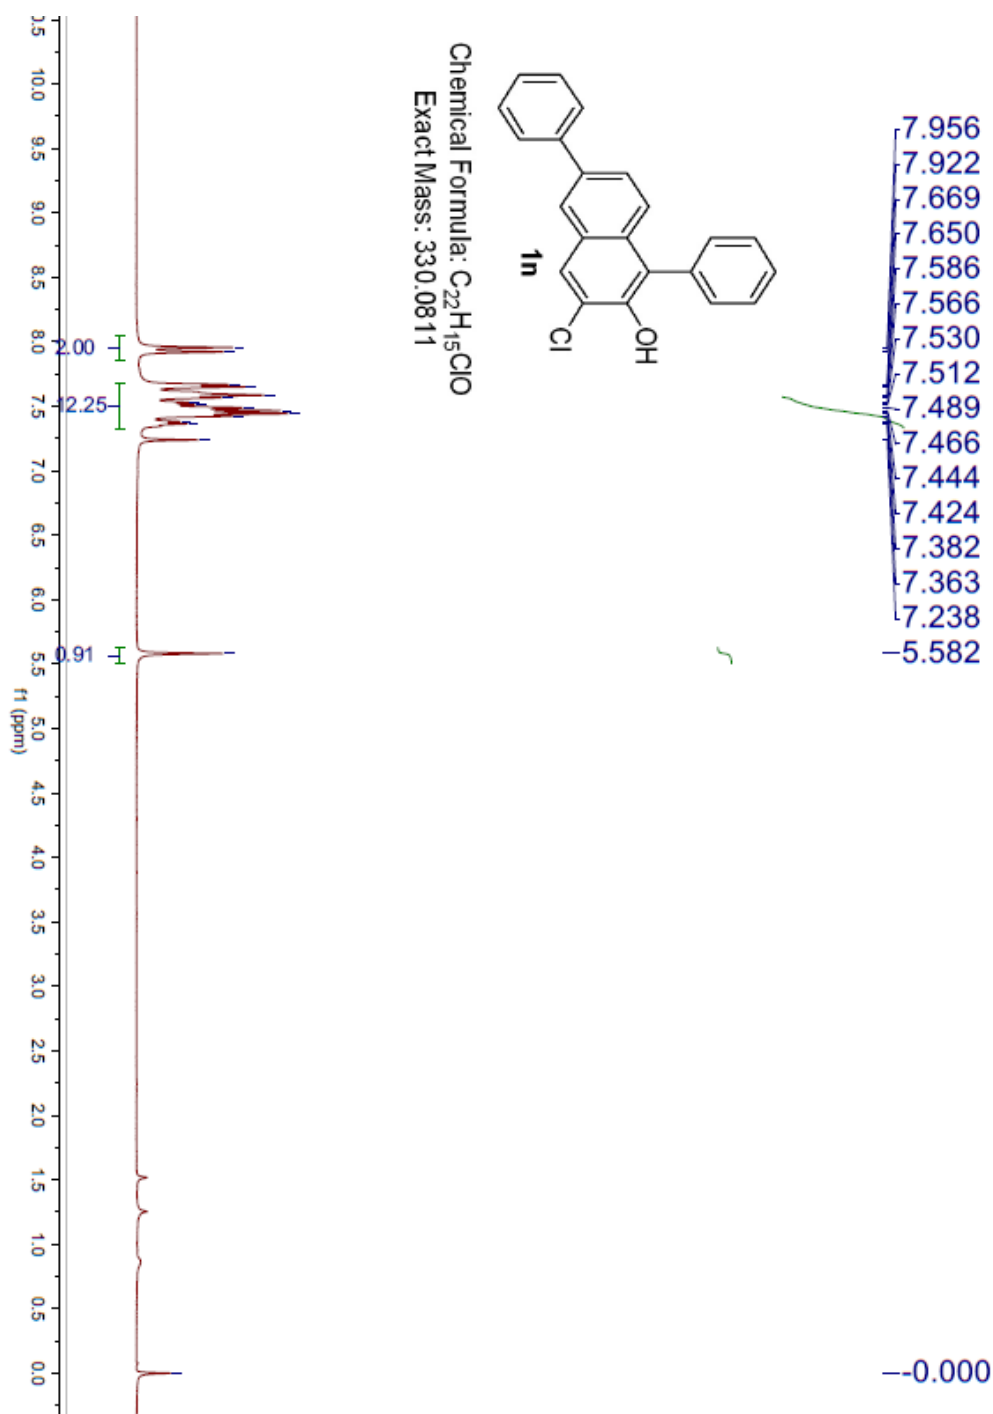

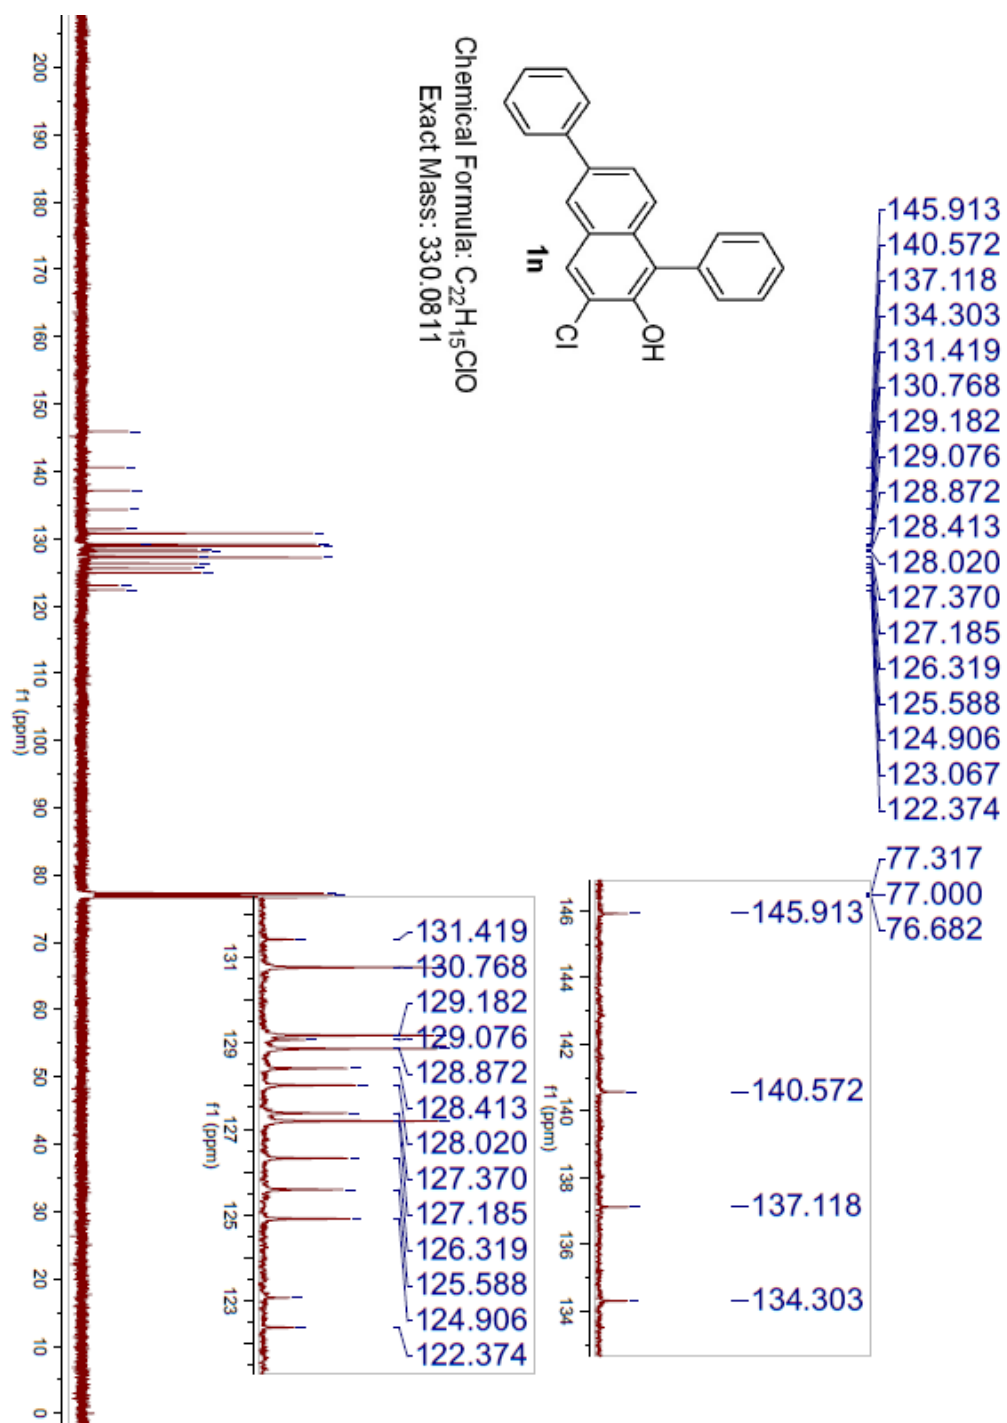

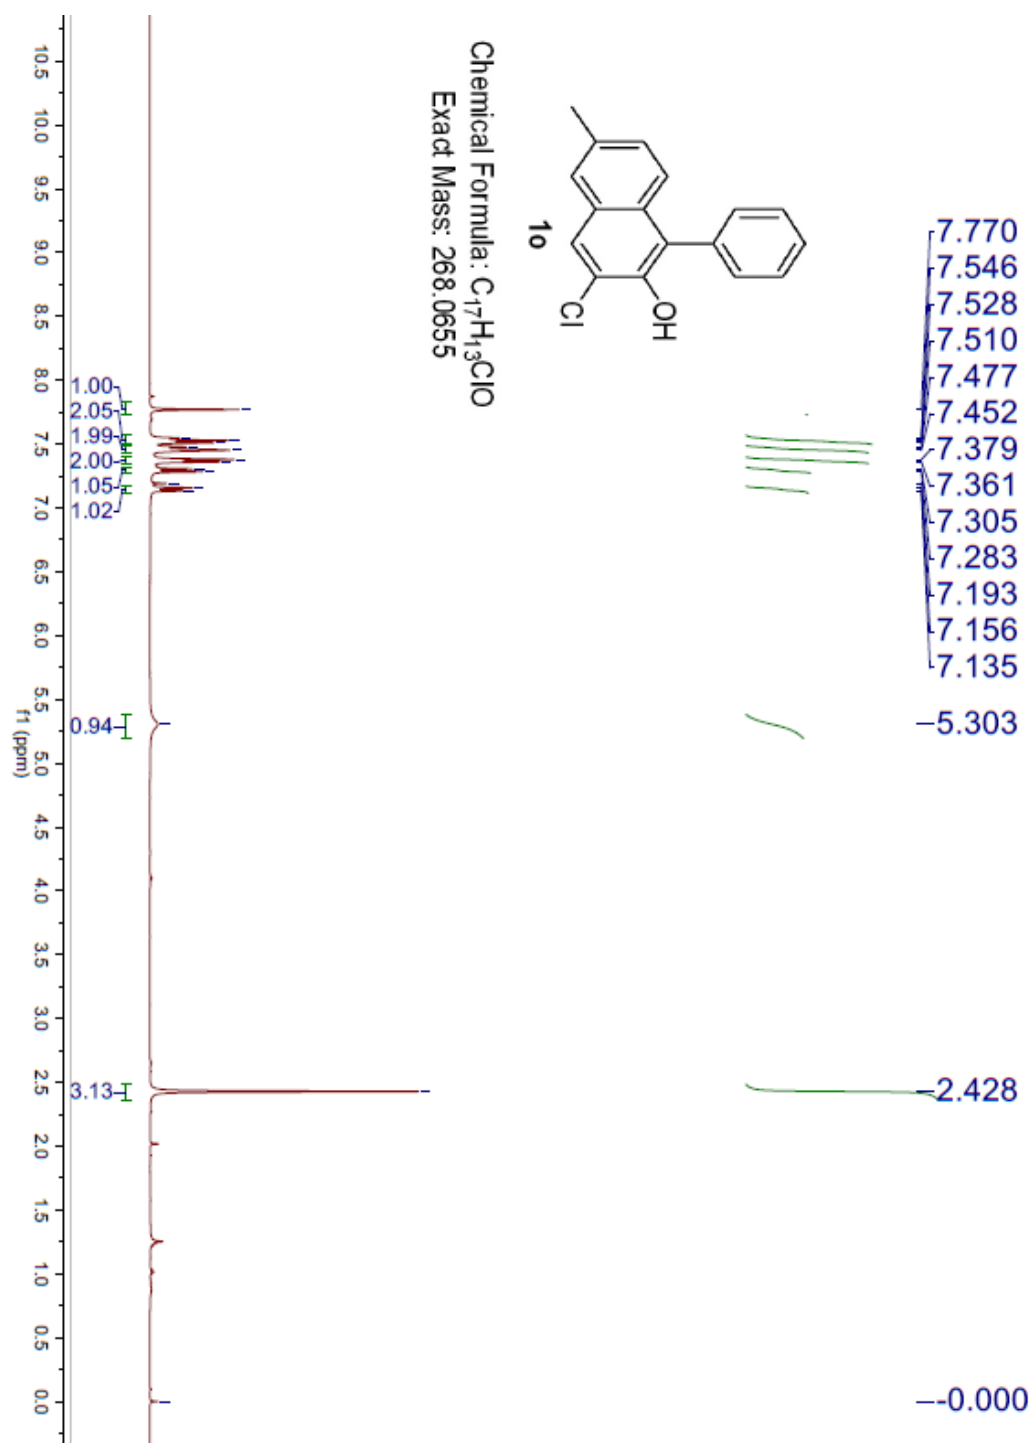



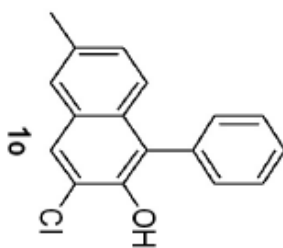

Chemical Formula:  $C_{17}H_{13}ClO$   
Exact Mass: 268.0655

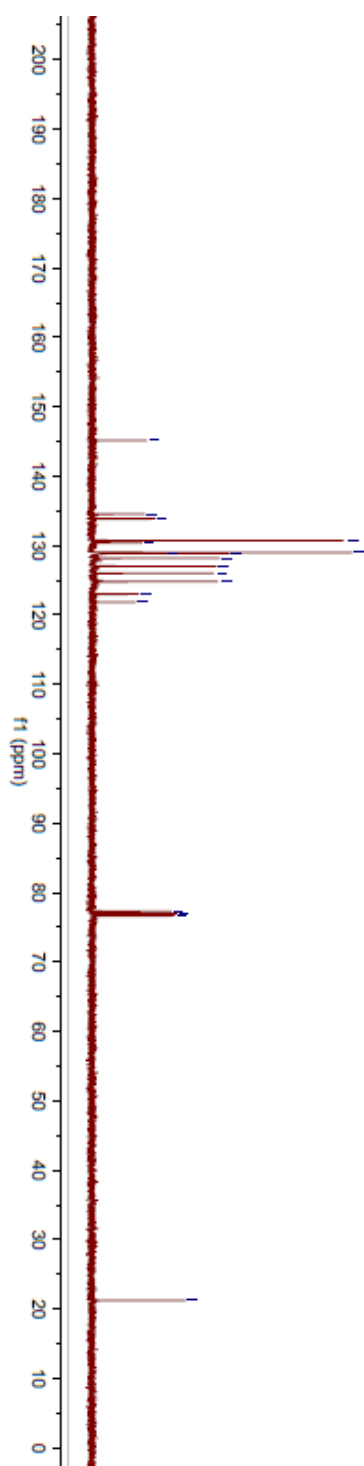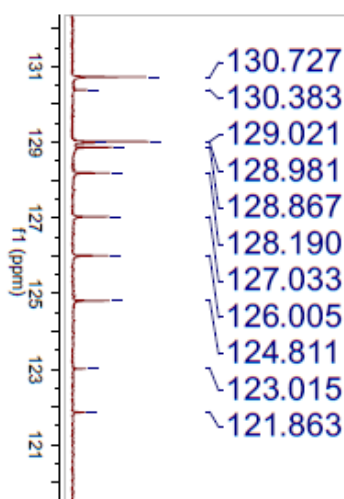

-145.150

134.537  
133.865  
130.727  
129.021  
128.981  
128.867  
128.190  
127.033  
126.005  
124.811  
77.317  
77.000  
76.682

-21.267

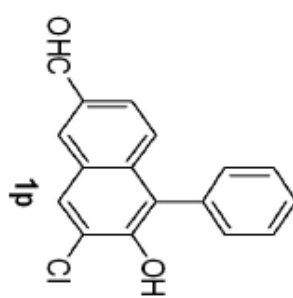

Chemical Formula:  $C_{17}H_{11}ClO_2$   
Exact Mass: 282.0448

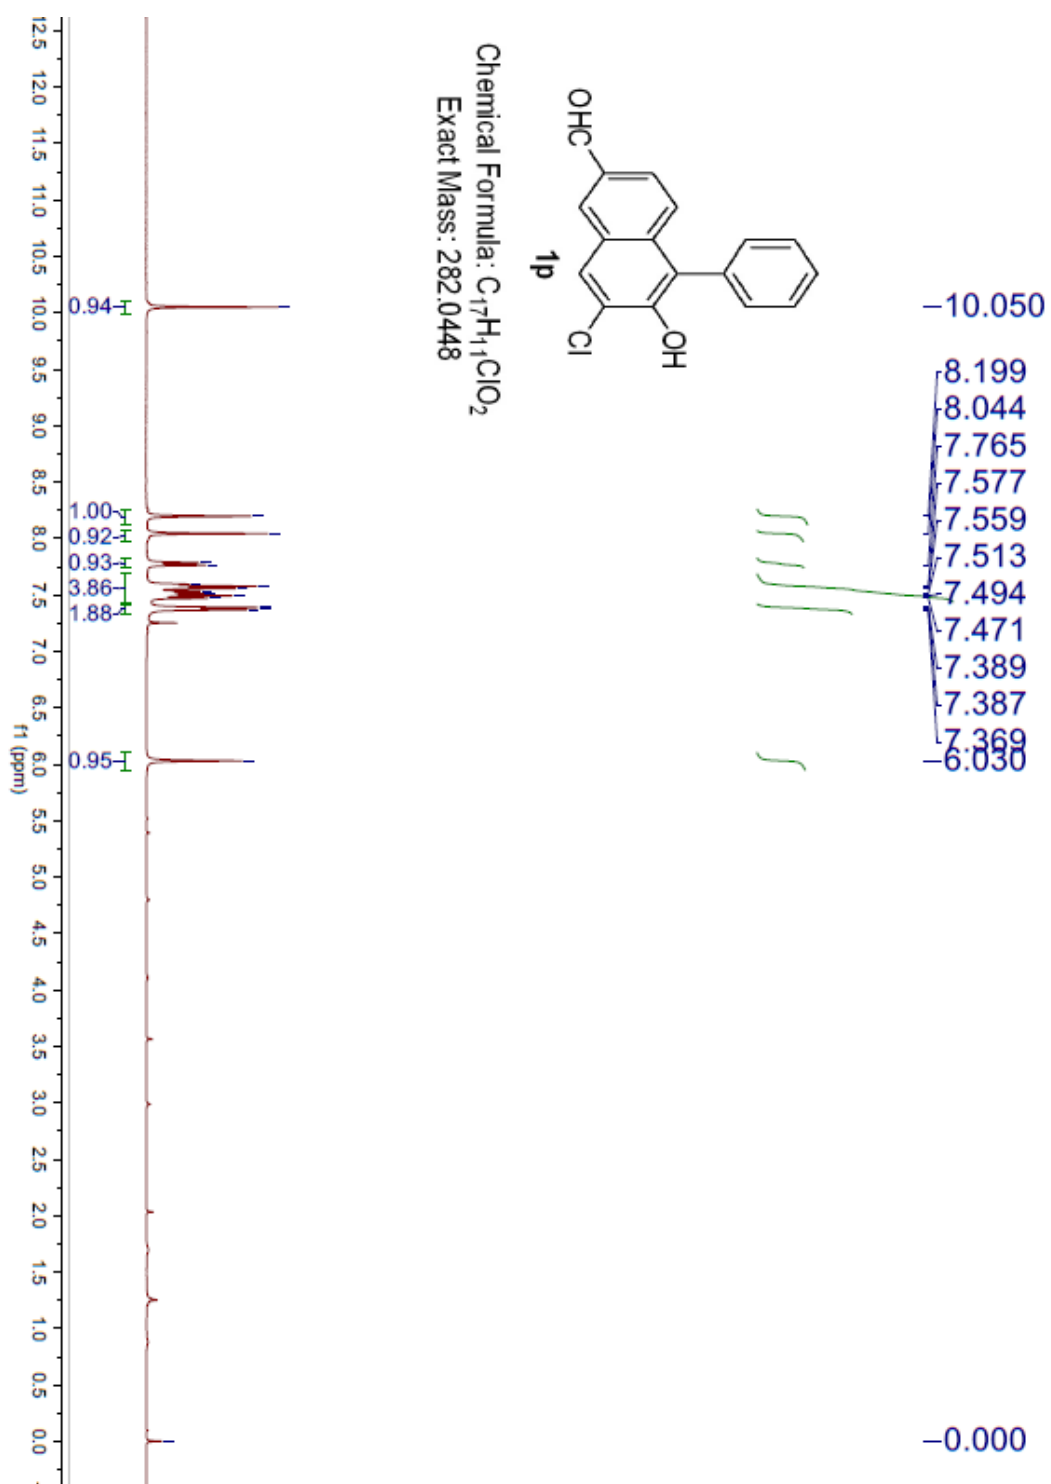

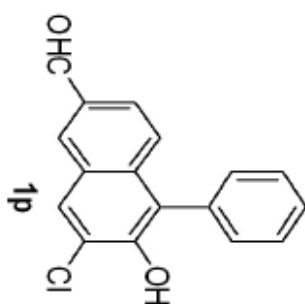

Chemical Formula:  $C_{17}H_{11}ClO_2$   
Exact Mass: 282.0448

-191.674

-148.672

135.421  
133.446  
132.564  
130.625  
129.351  
129.298  
128.710  
127.771  
126.028  
123.571  
77.318  
77.000  
76.682

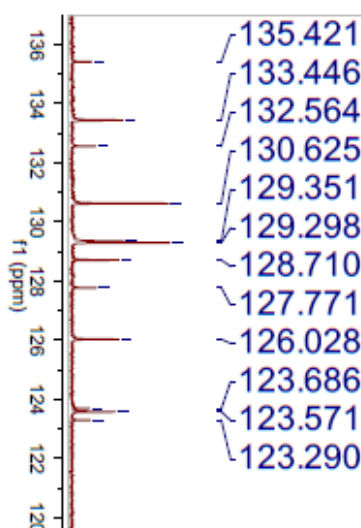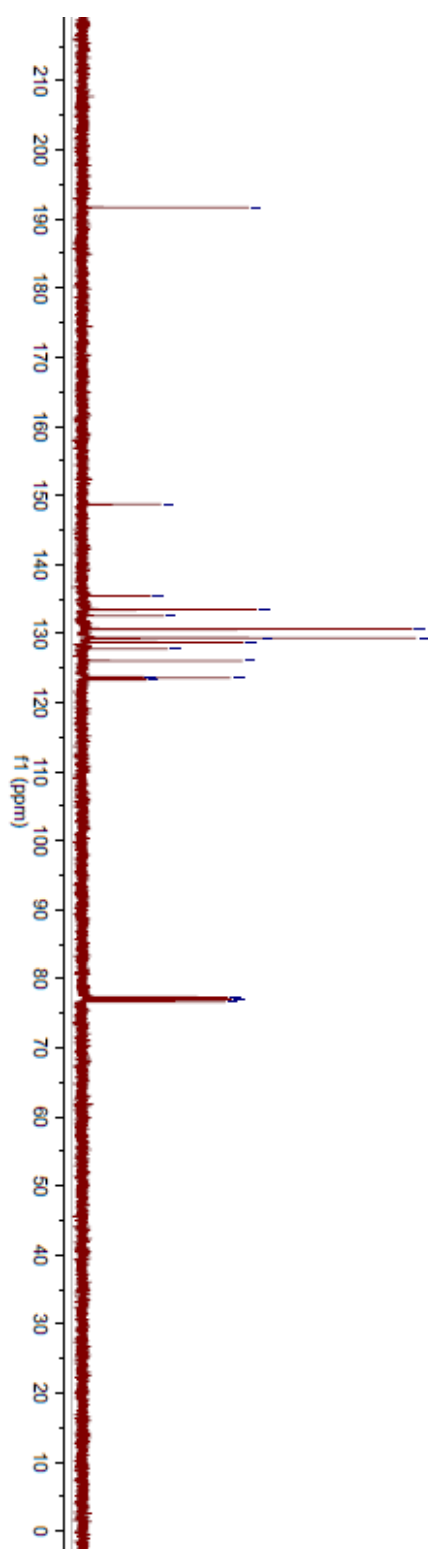

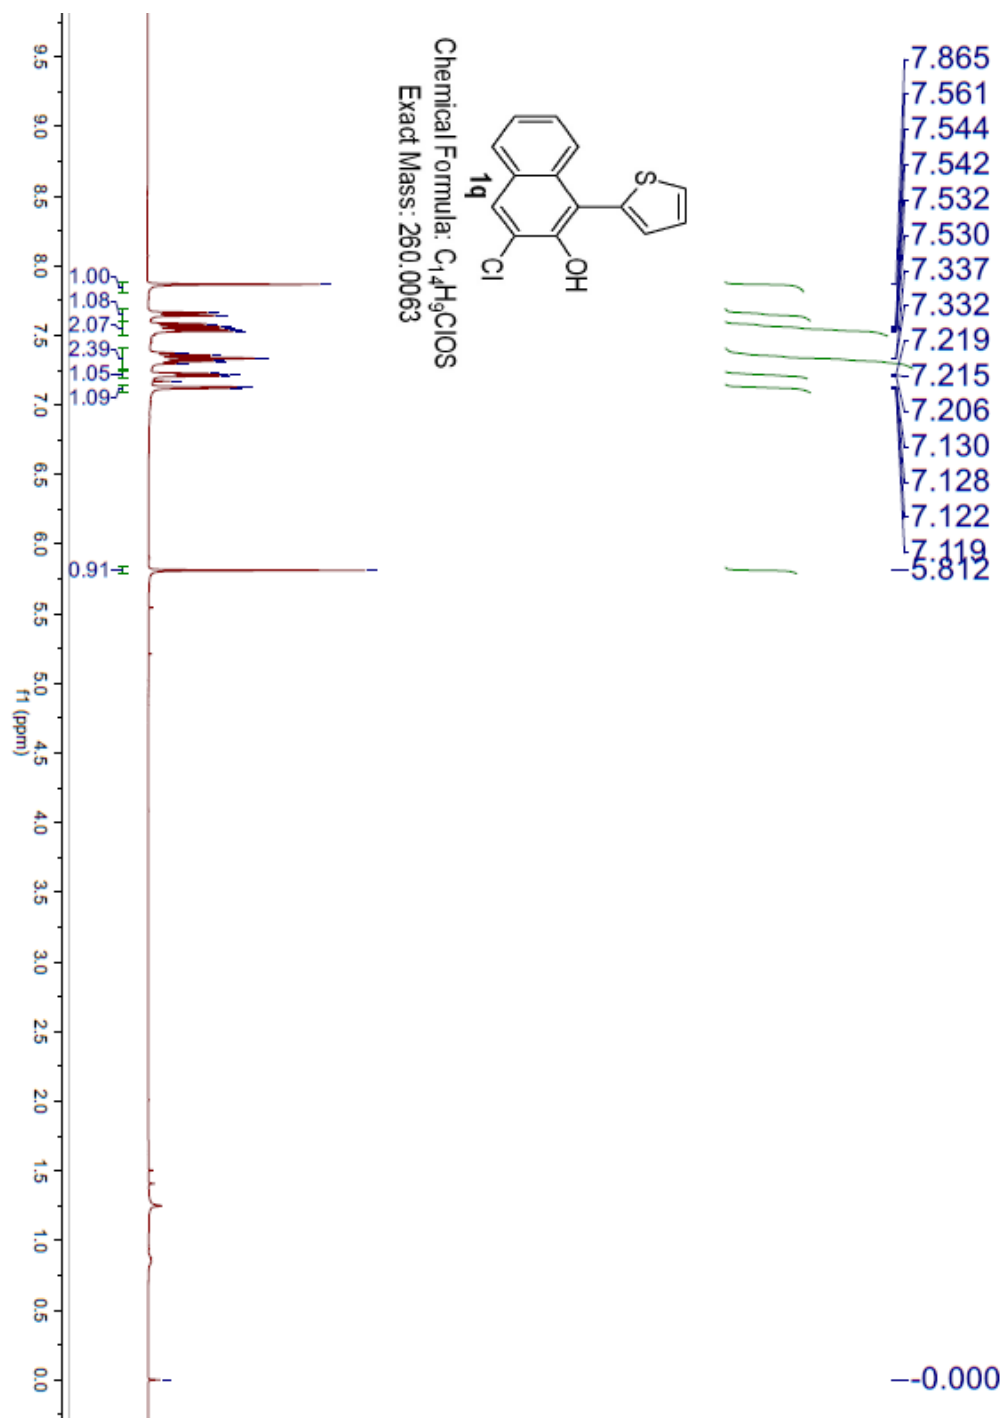

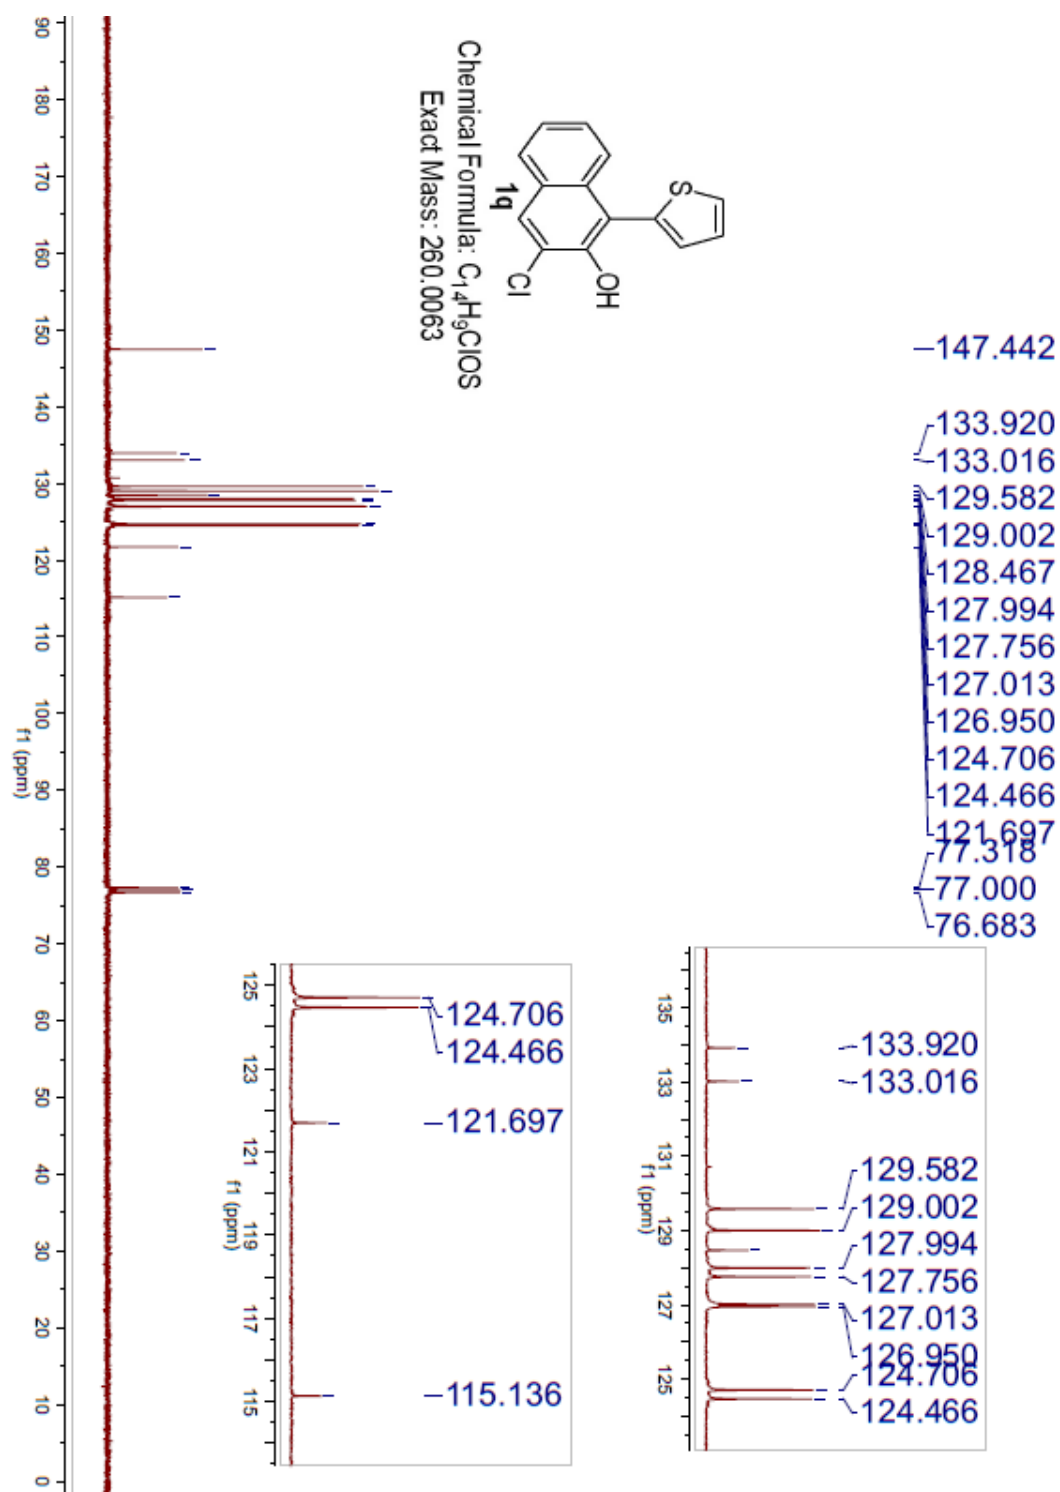

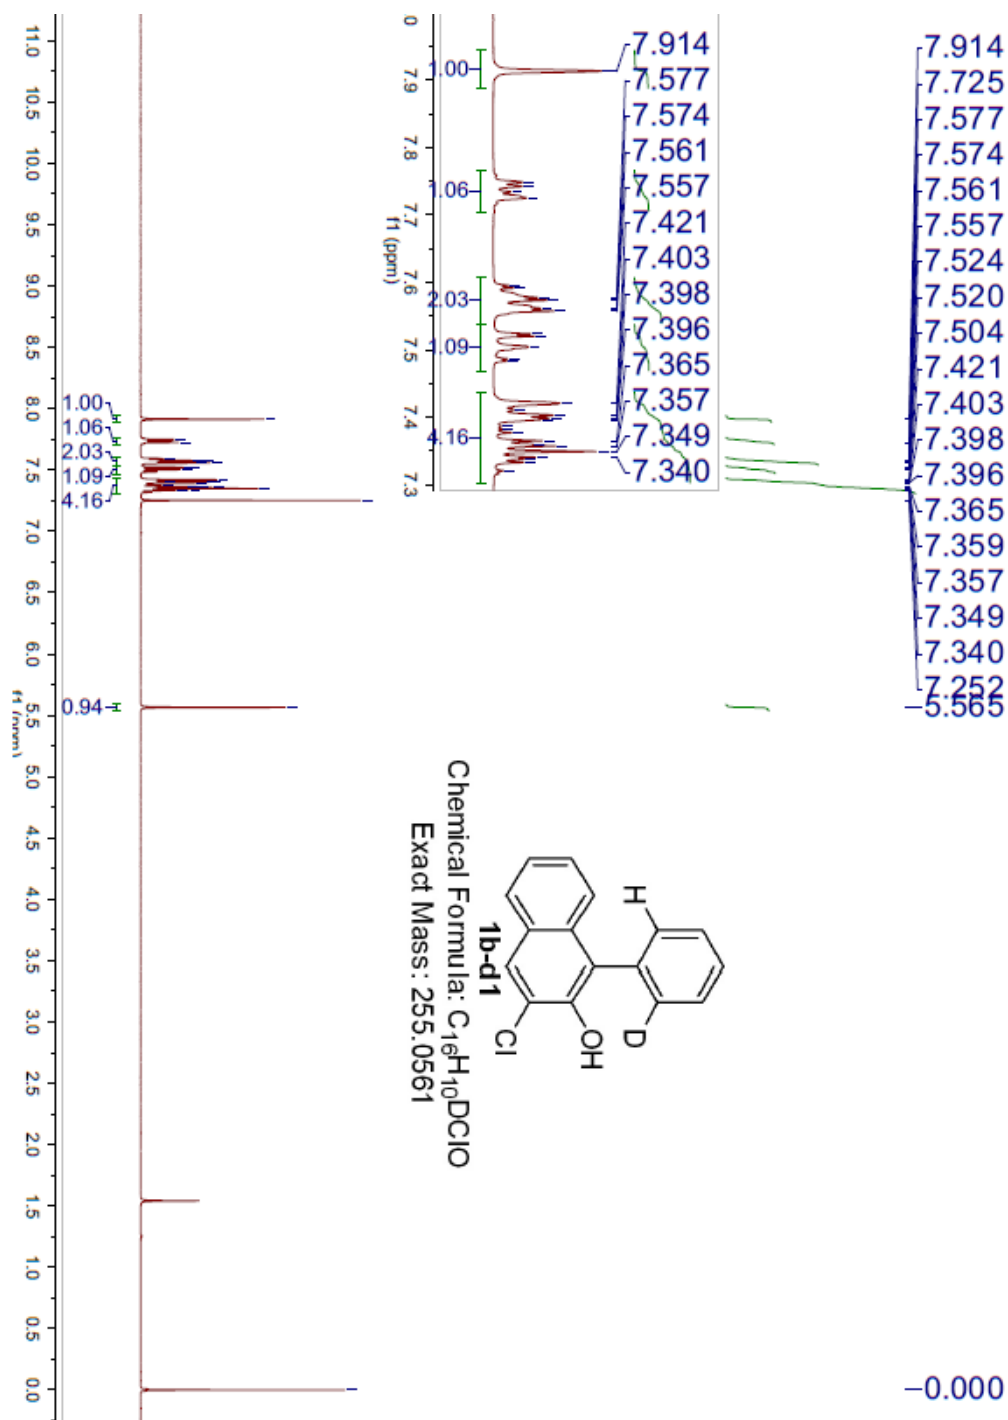

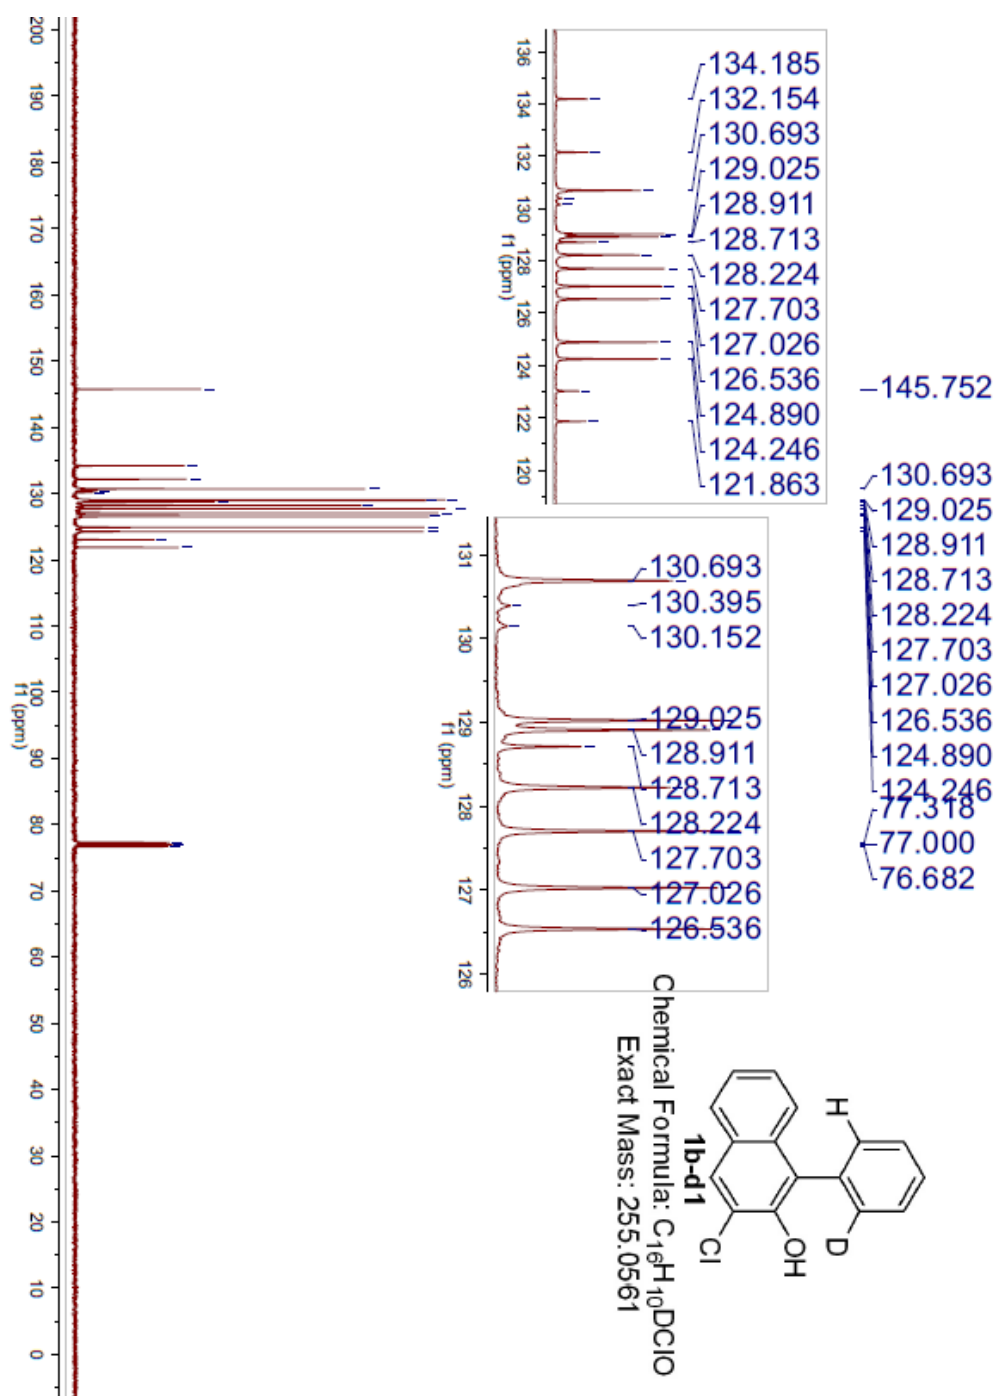

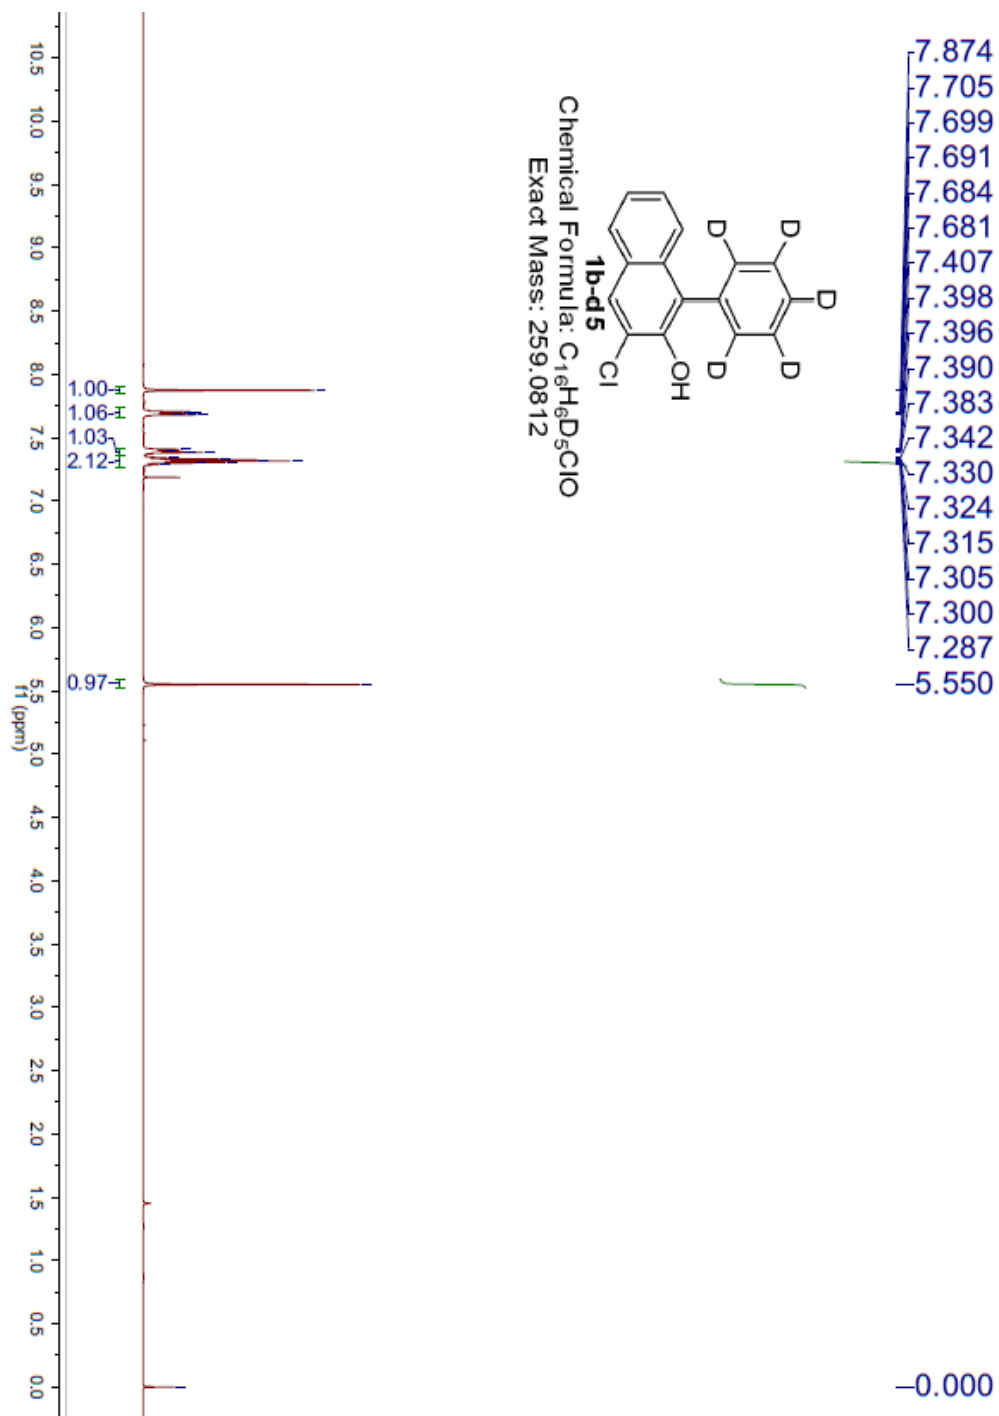



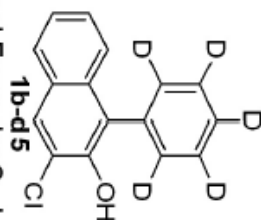

Chemical Formula:  $C_{16}H_6D_5ClO$   
Exact Mass: 259.0812

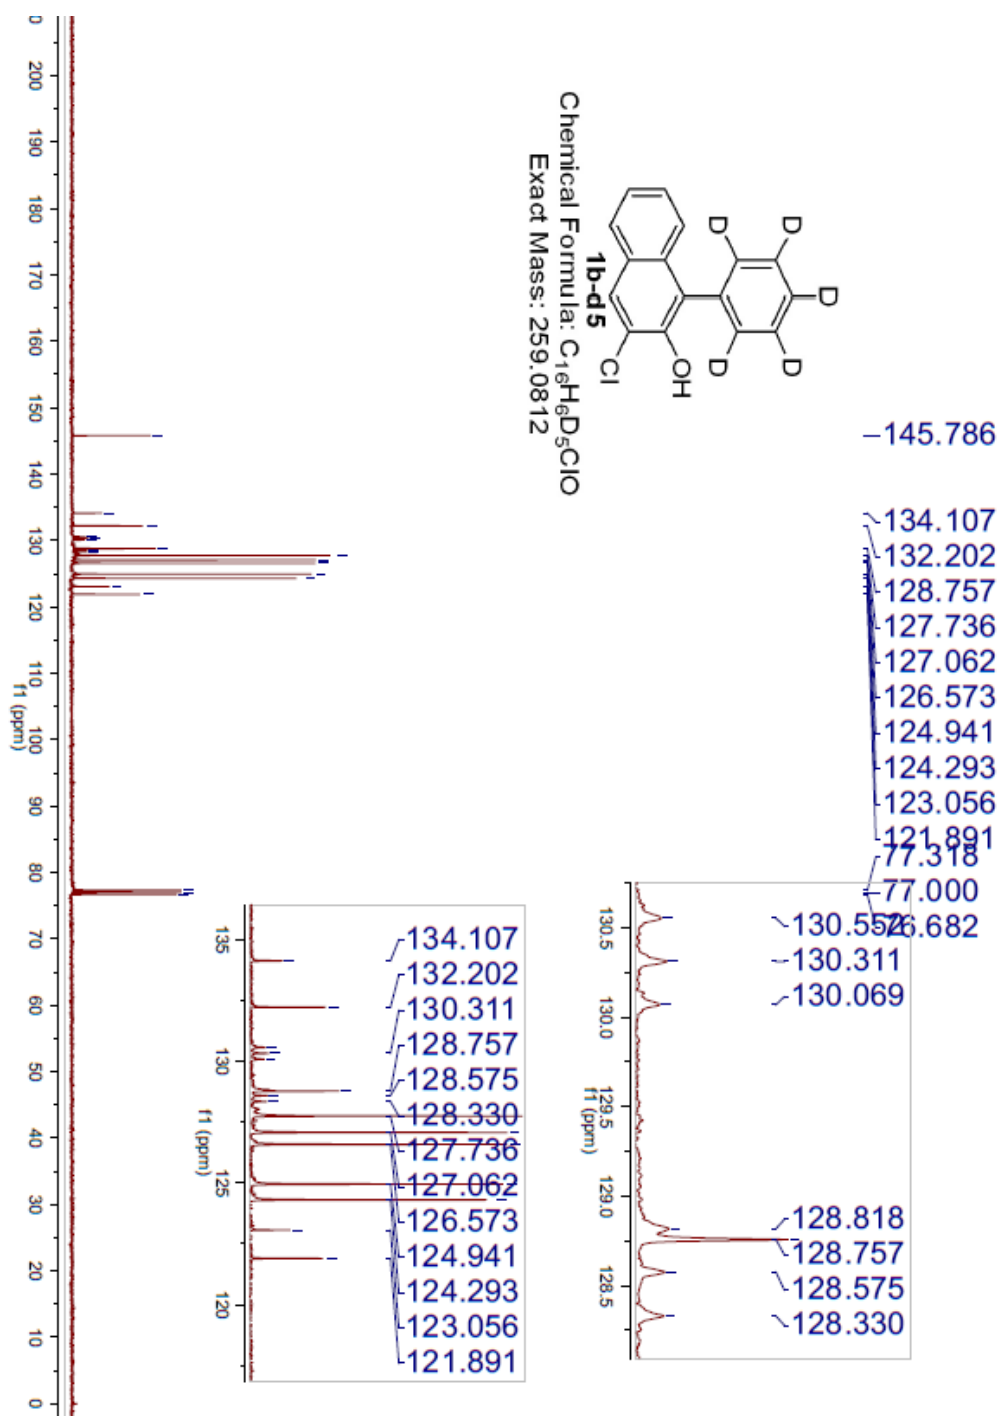

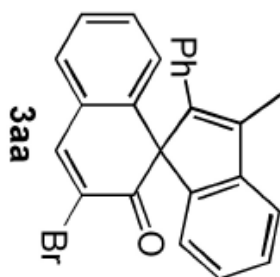

Chemical Formula:  $C_{25}H_{17}BrO$   
Exact Mass: 412.0463

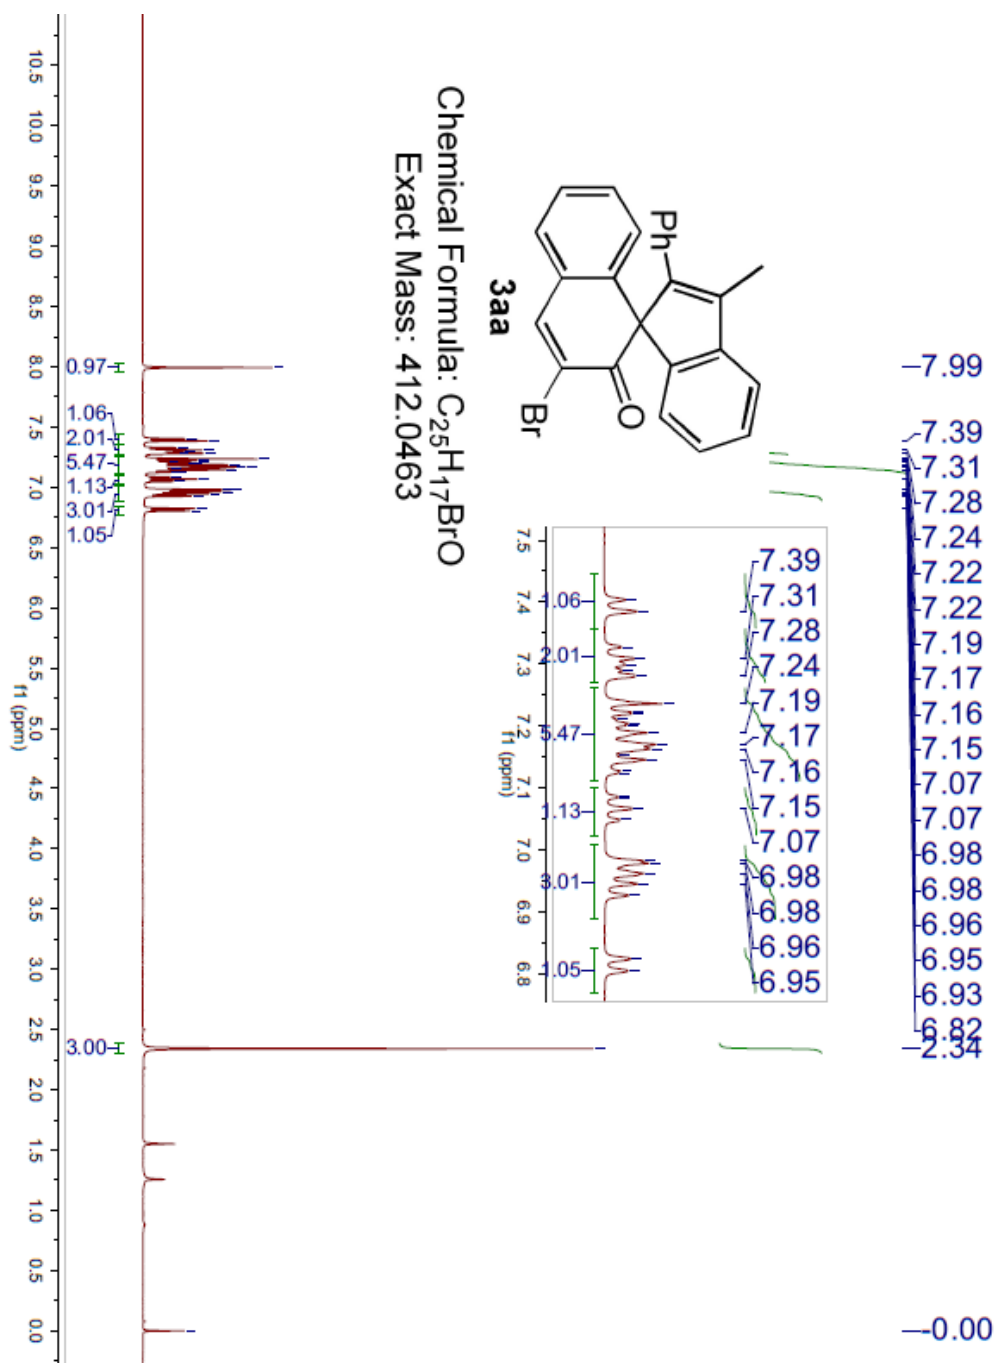

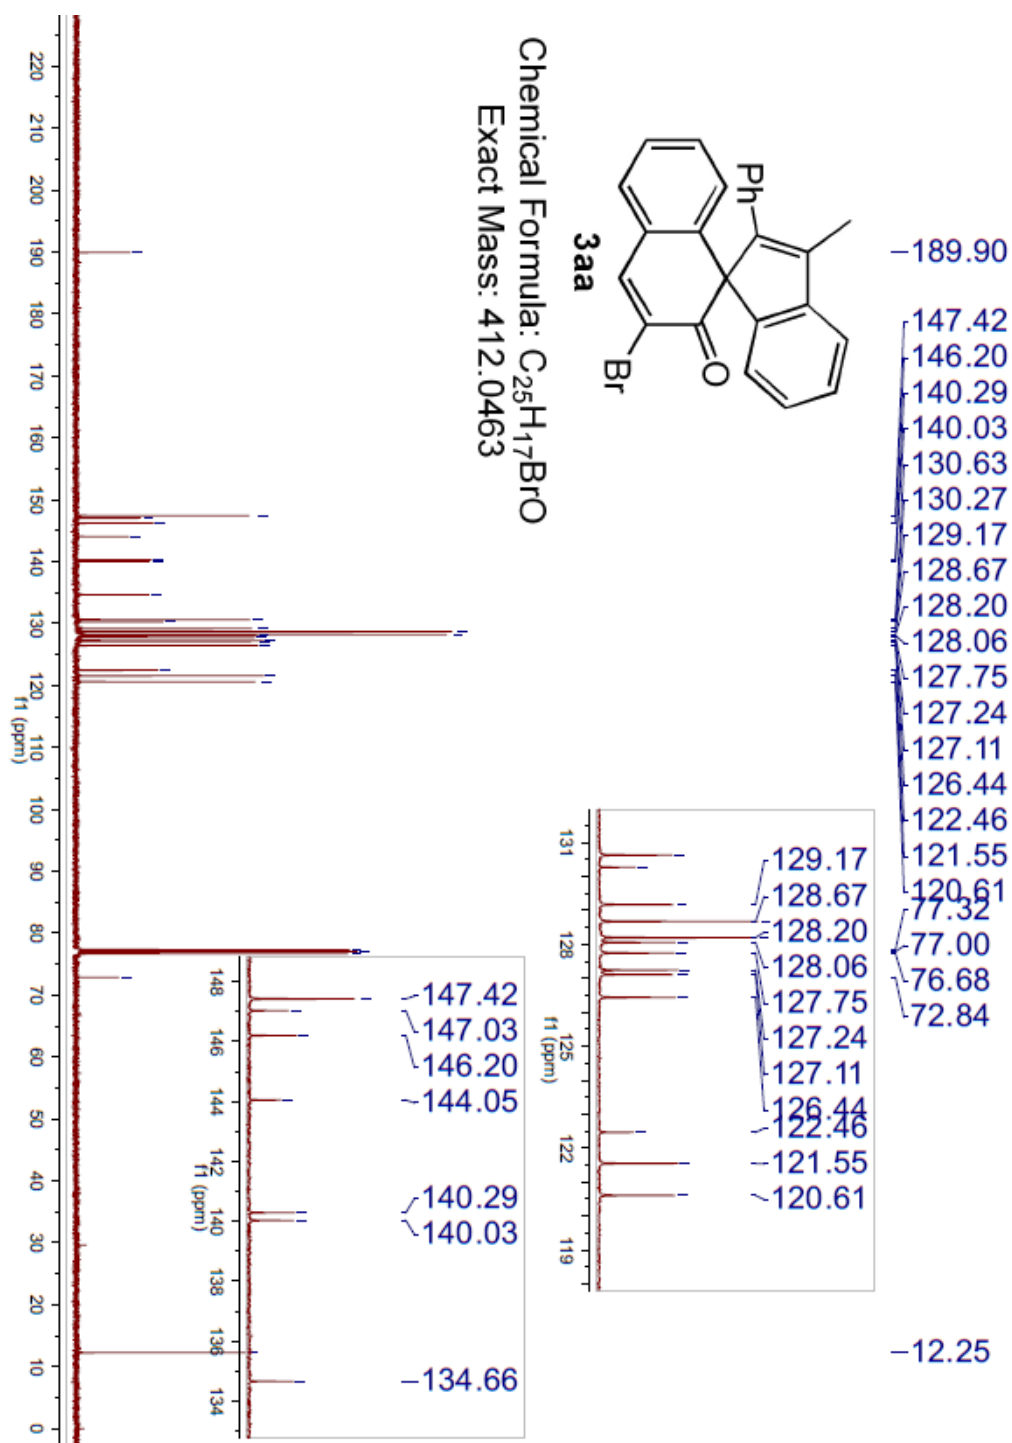

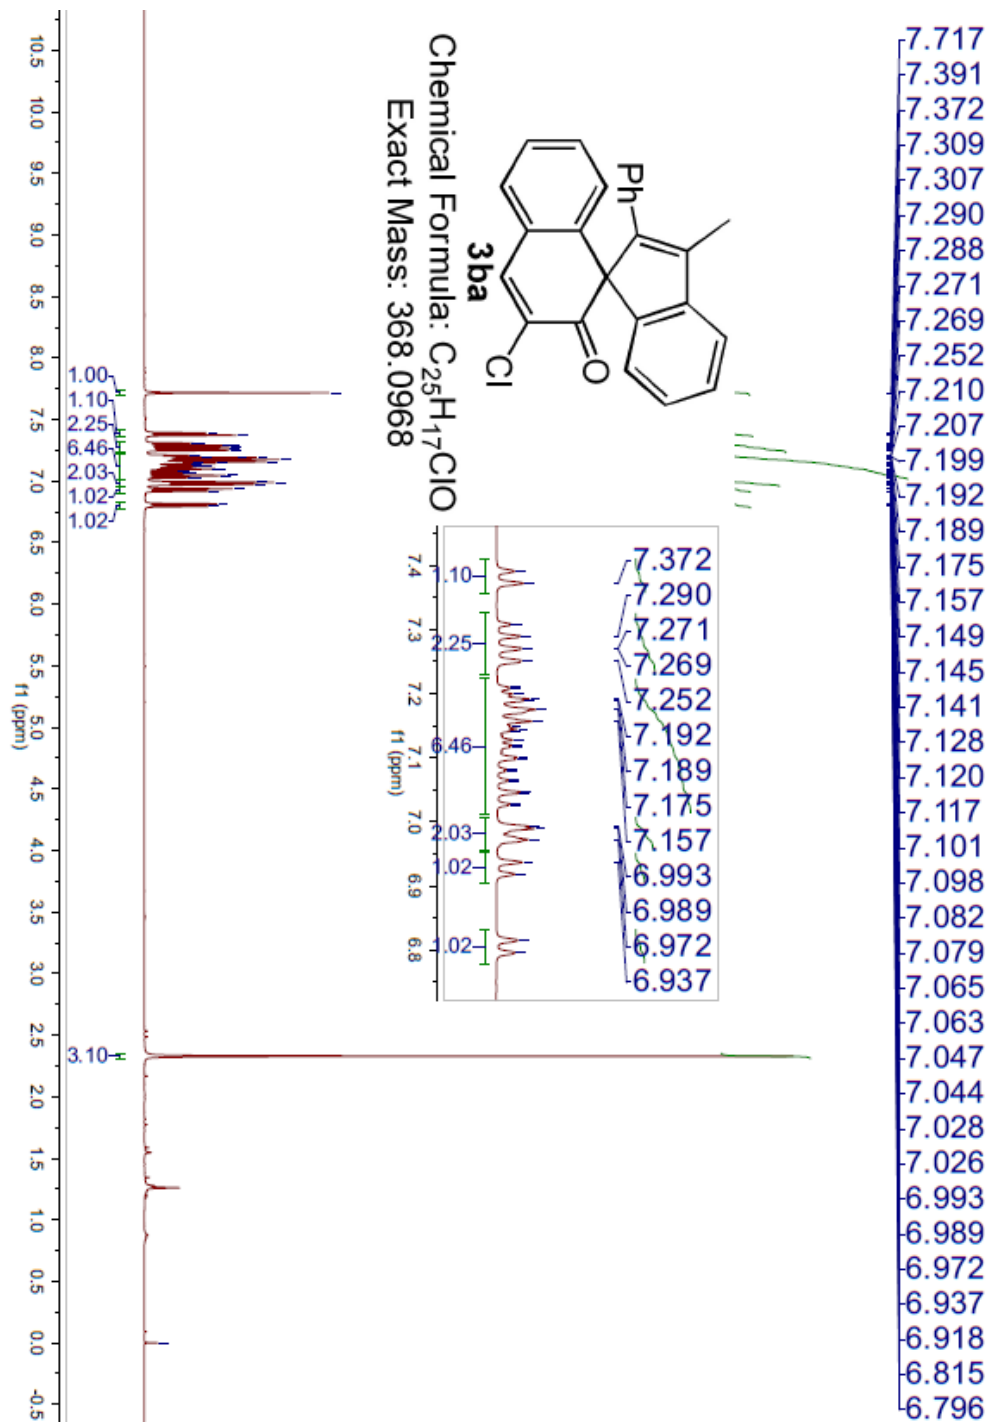

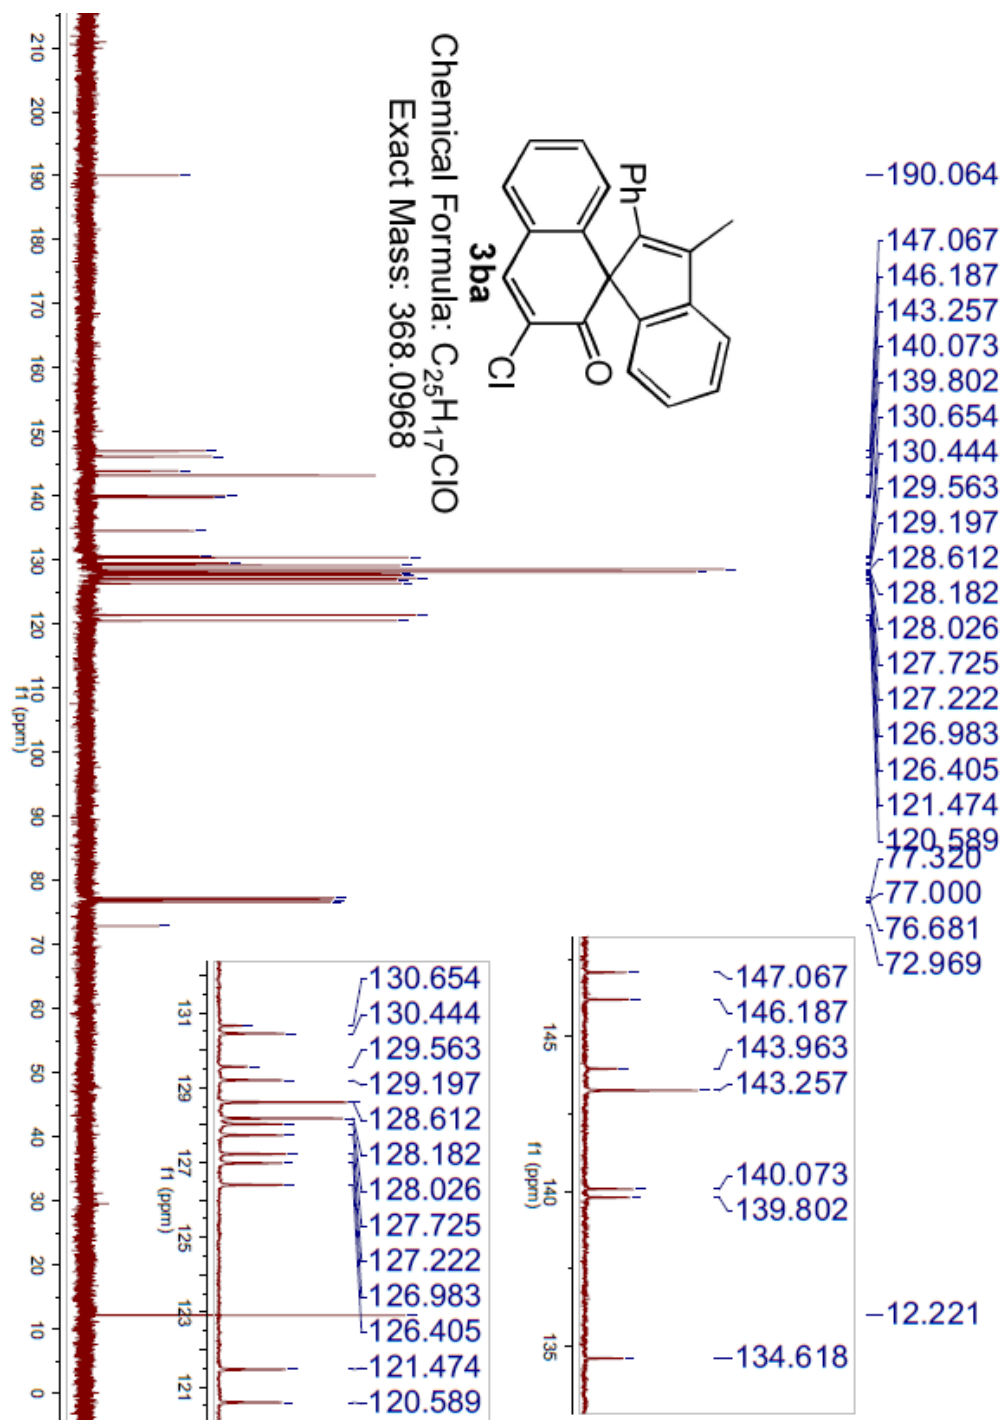

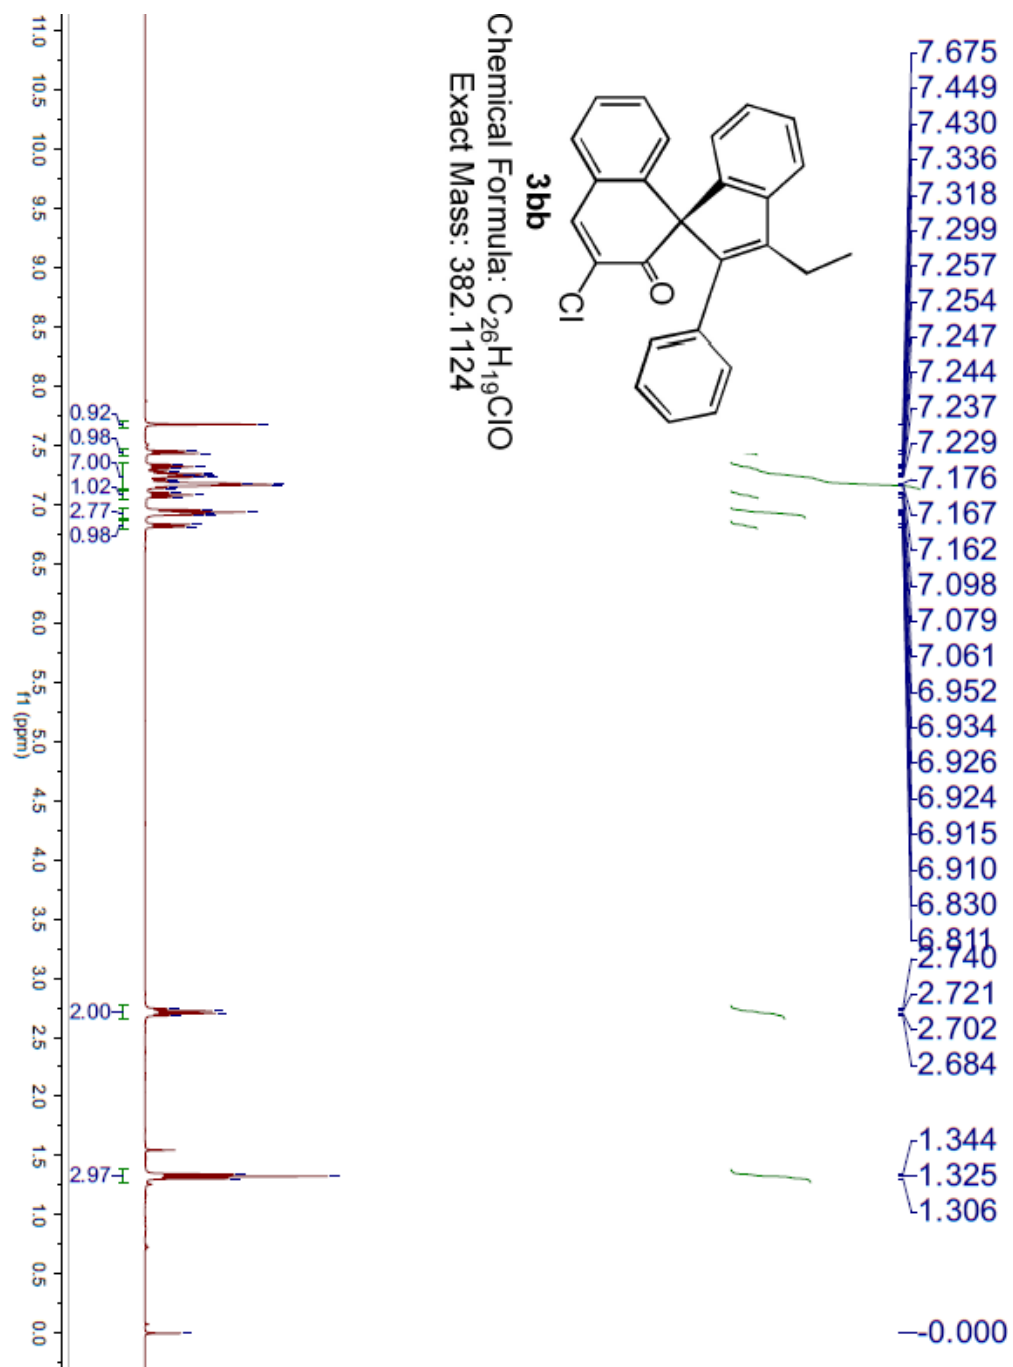

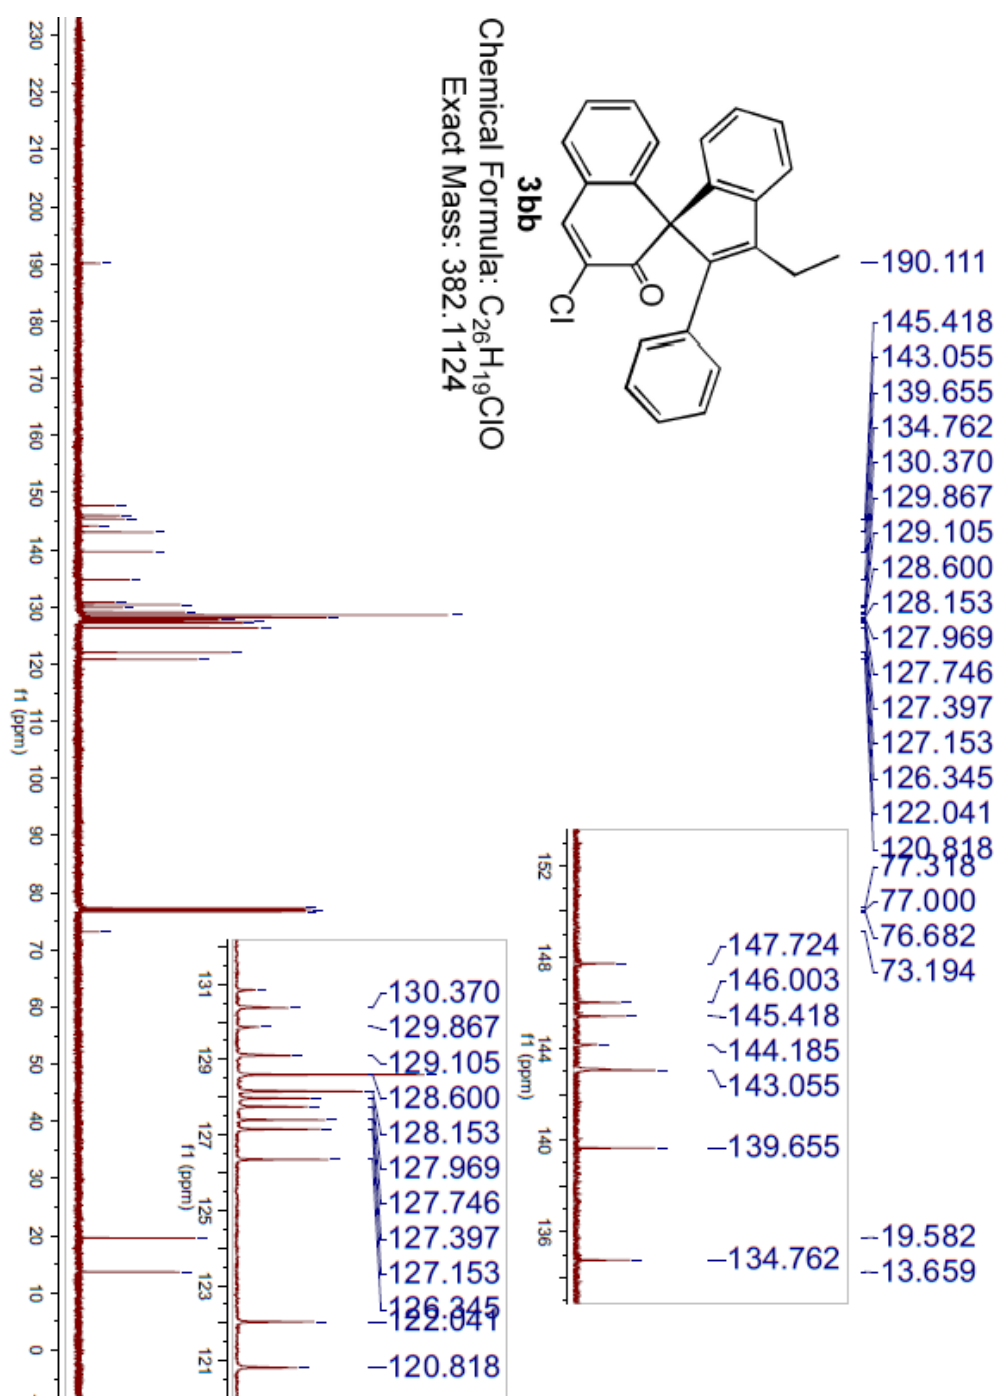

Chemical Formula:  $C_{27}H_{19}ClO$   
Exact Mass: 394.1124

**3bc**

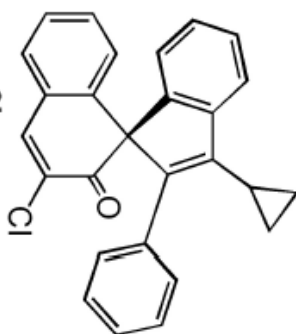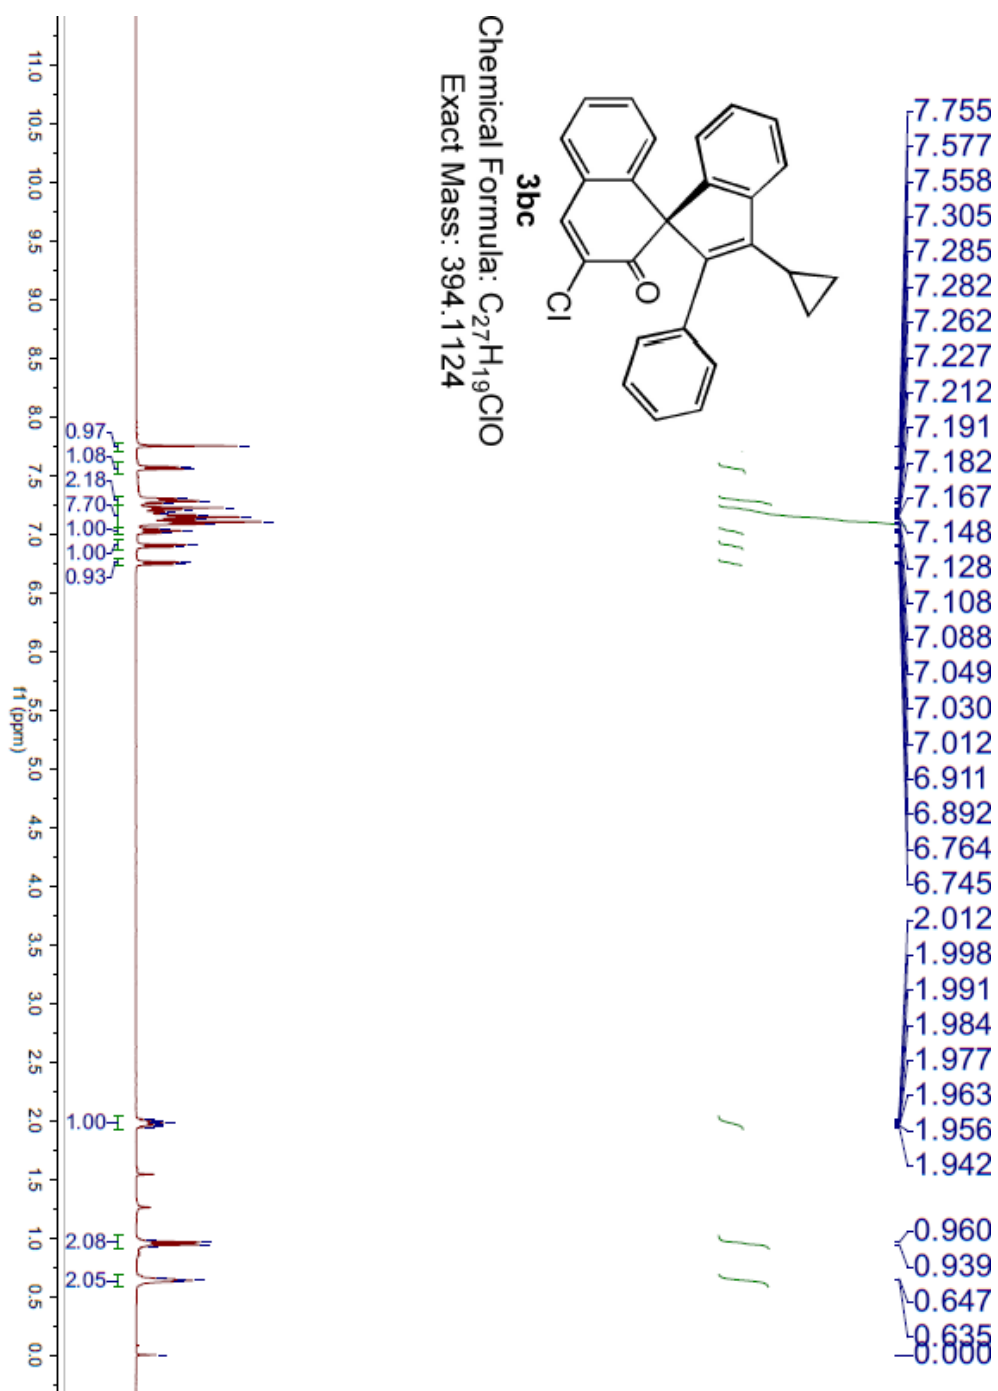



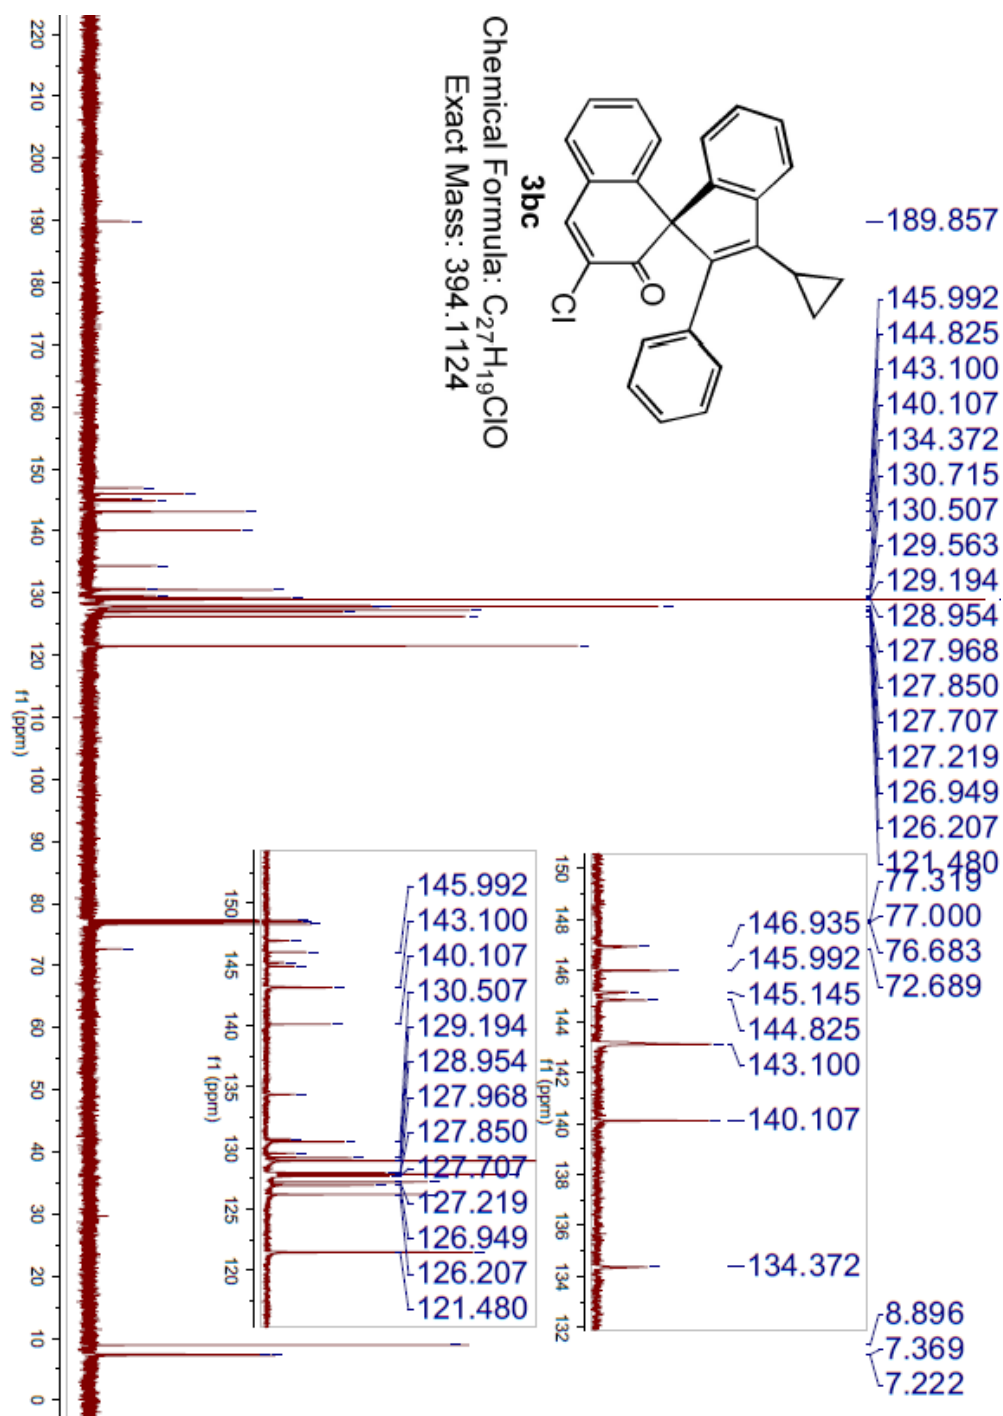

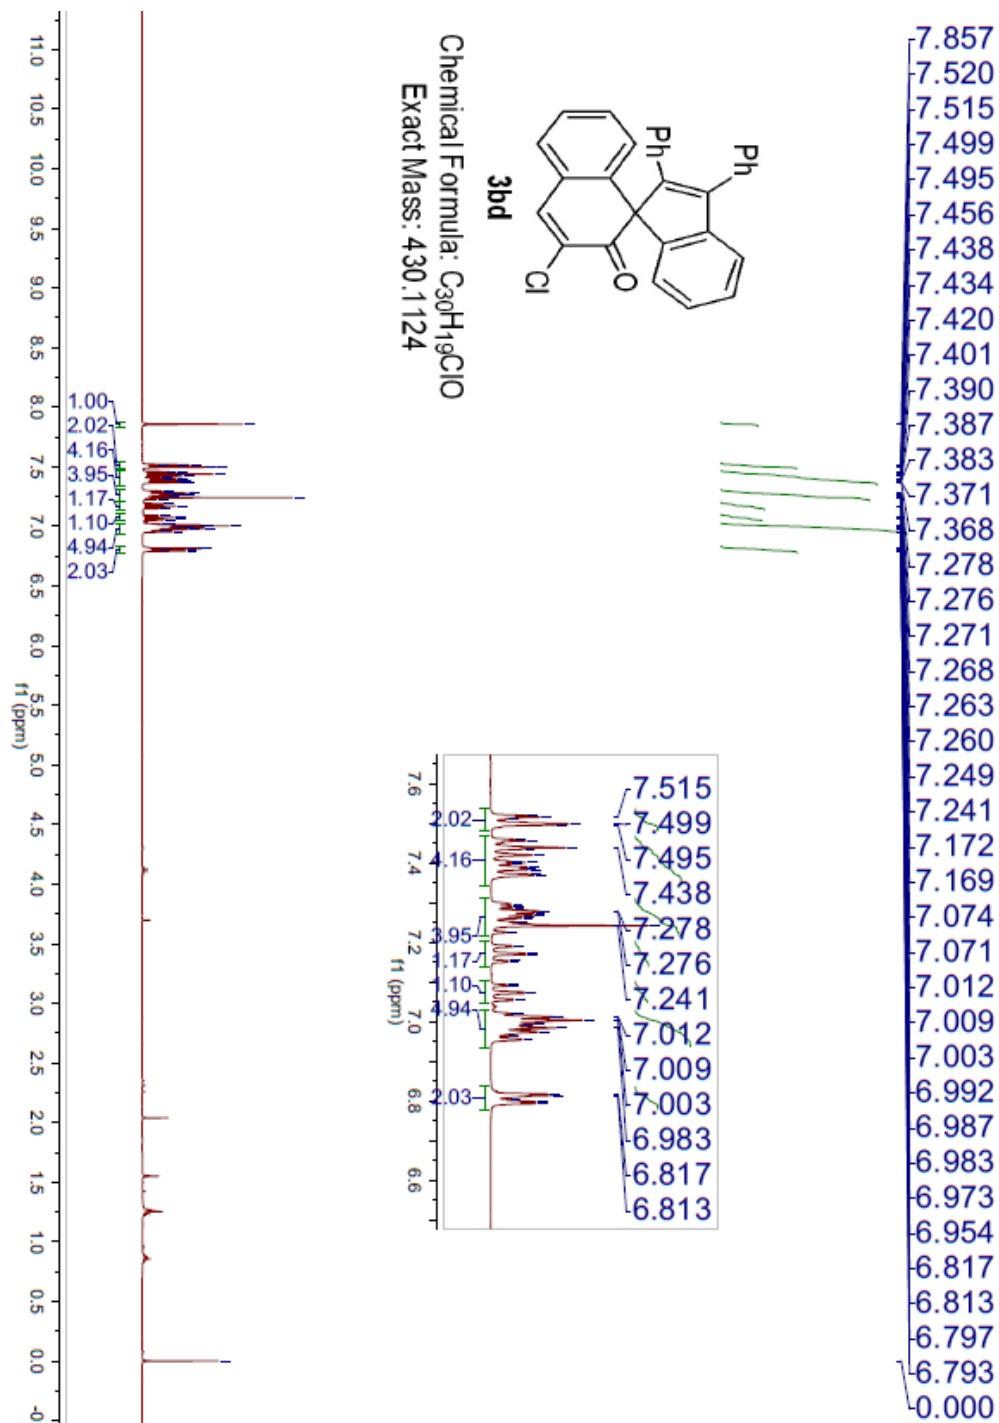

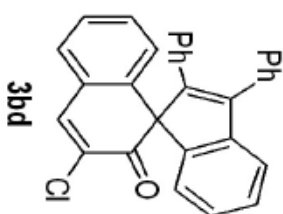

Chemical Formula:  $C_{30}H_{19}ClO$   
Exact Mass: 430.1124

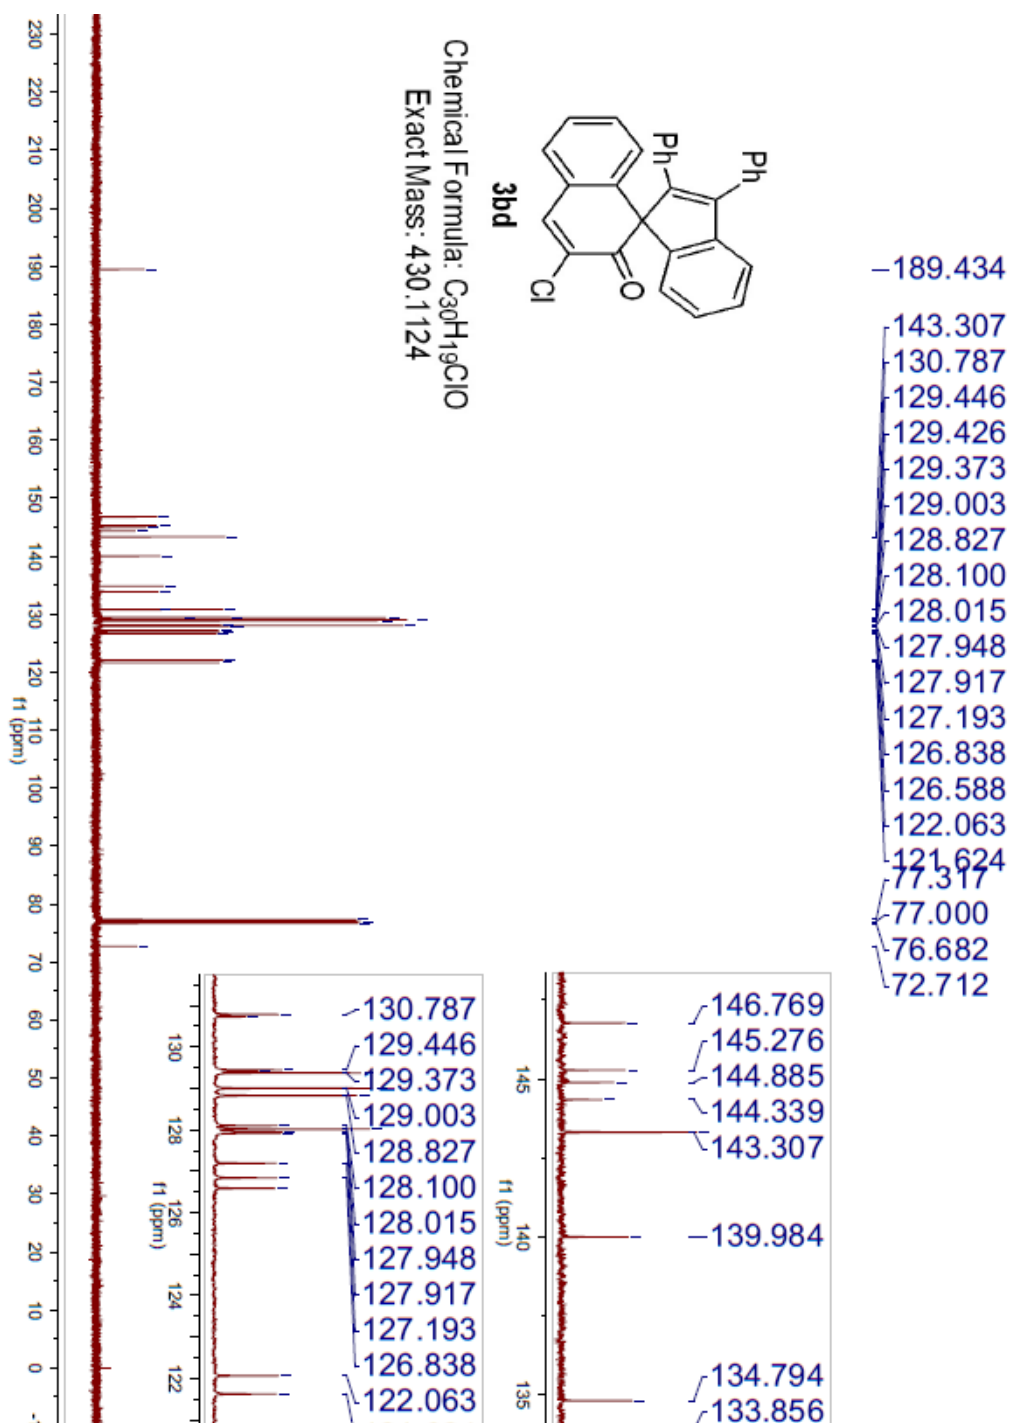

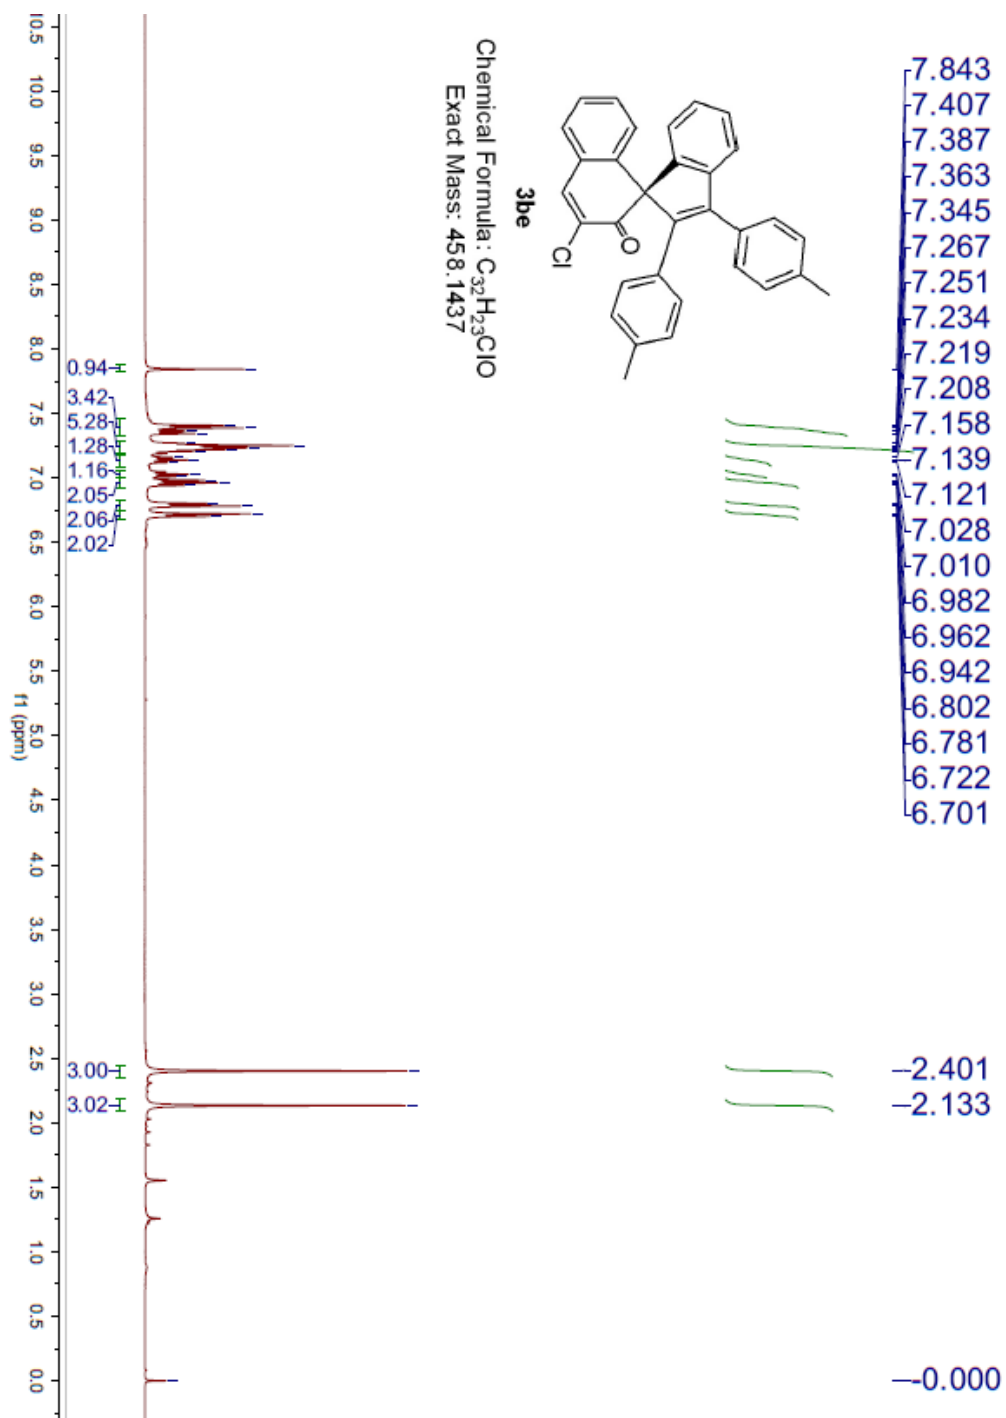

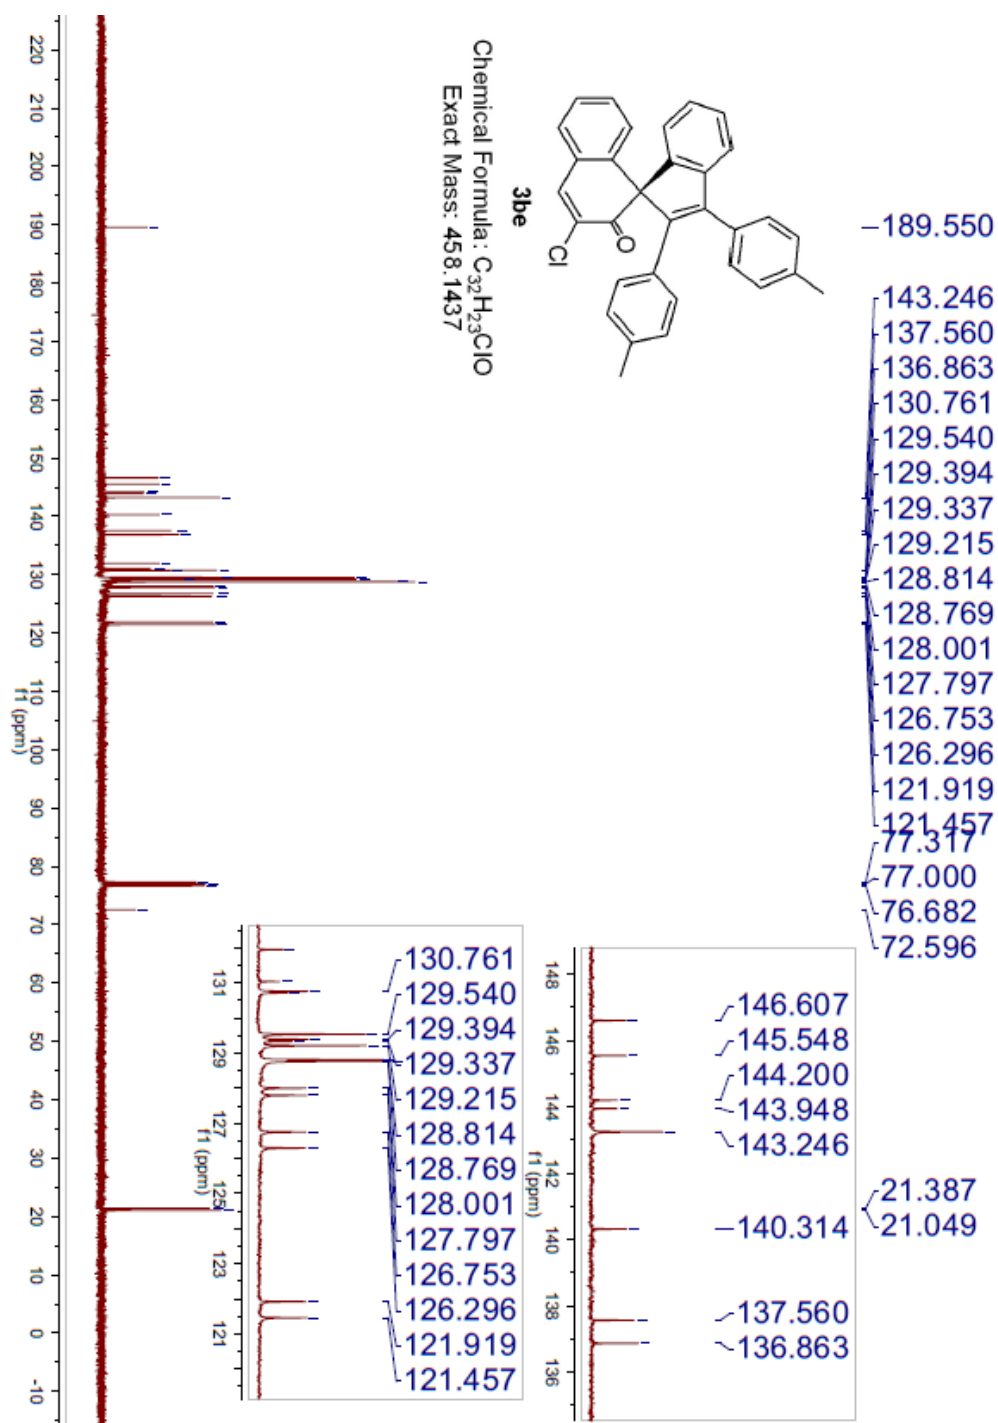

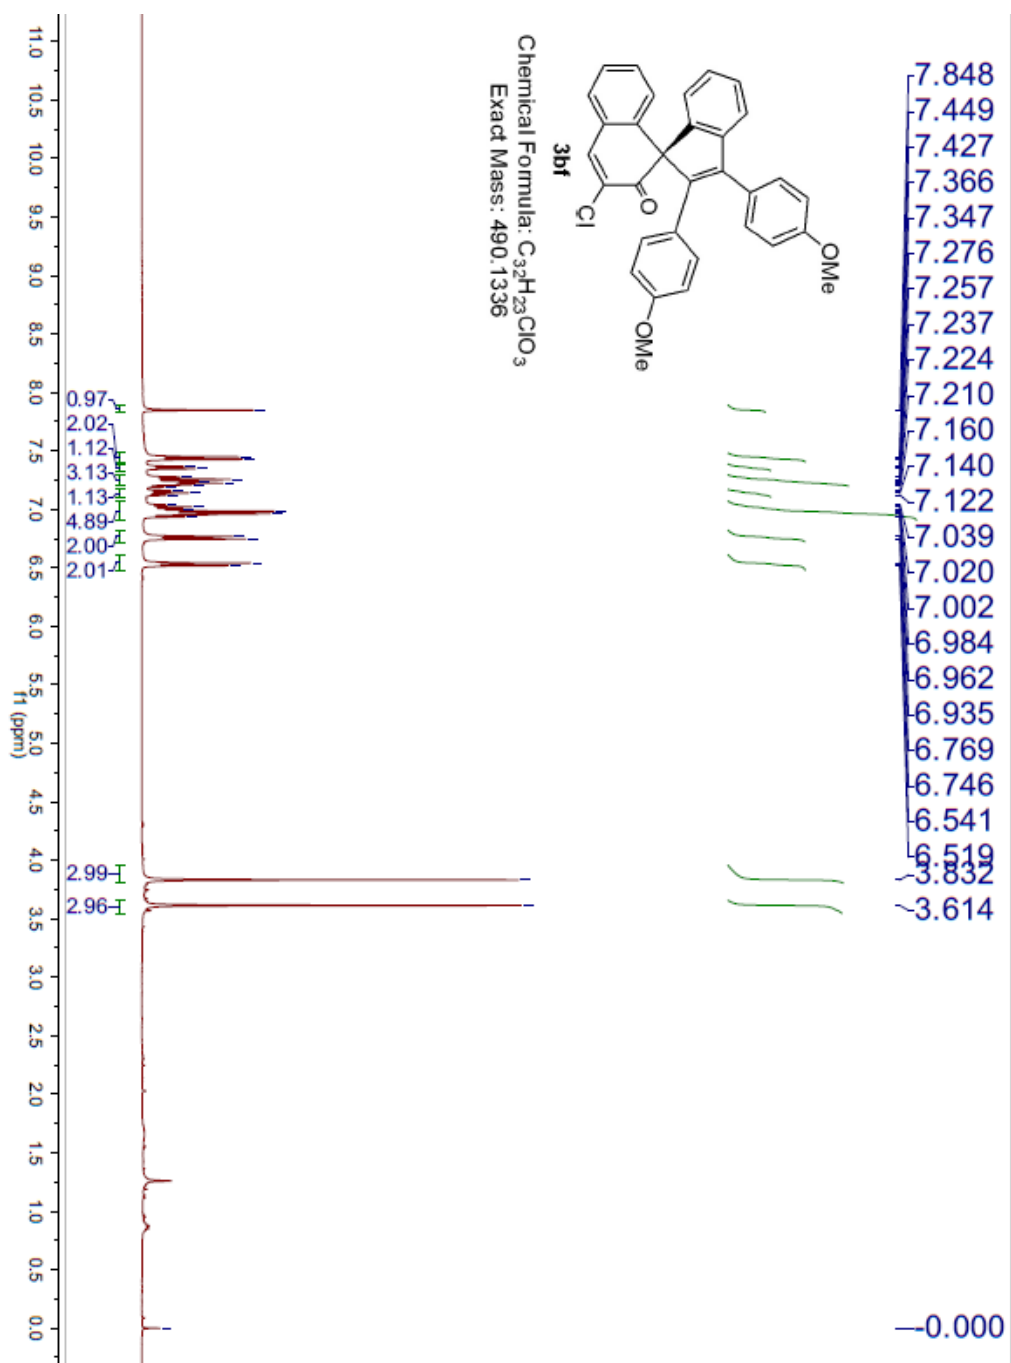

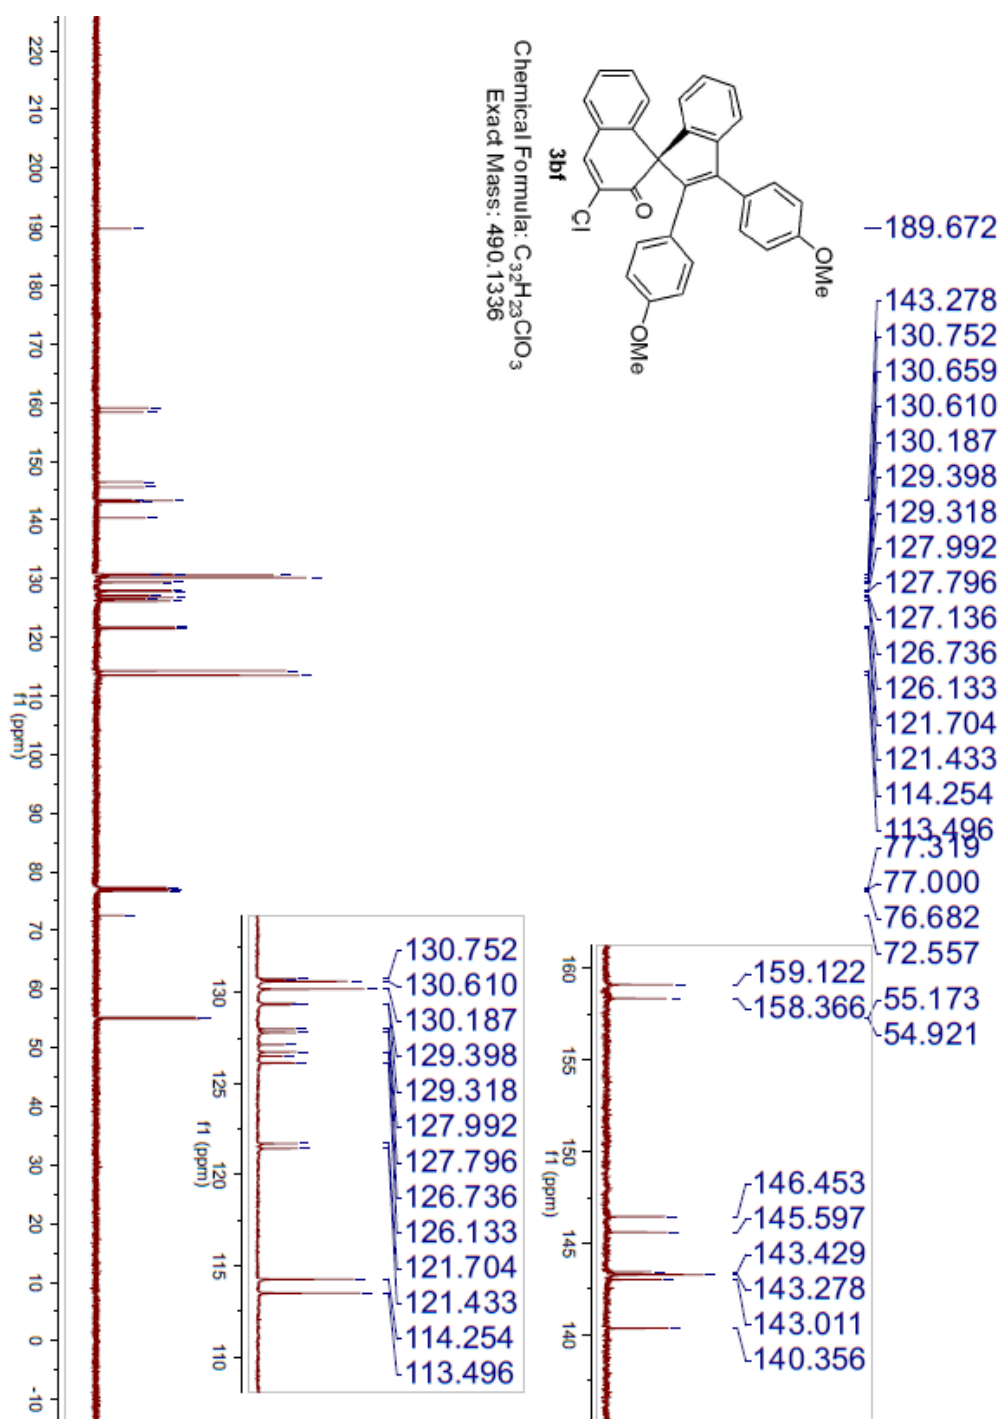

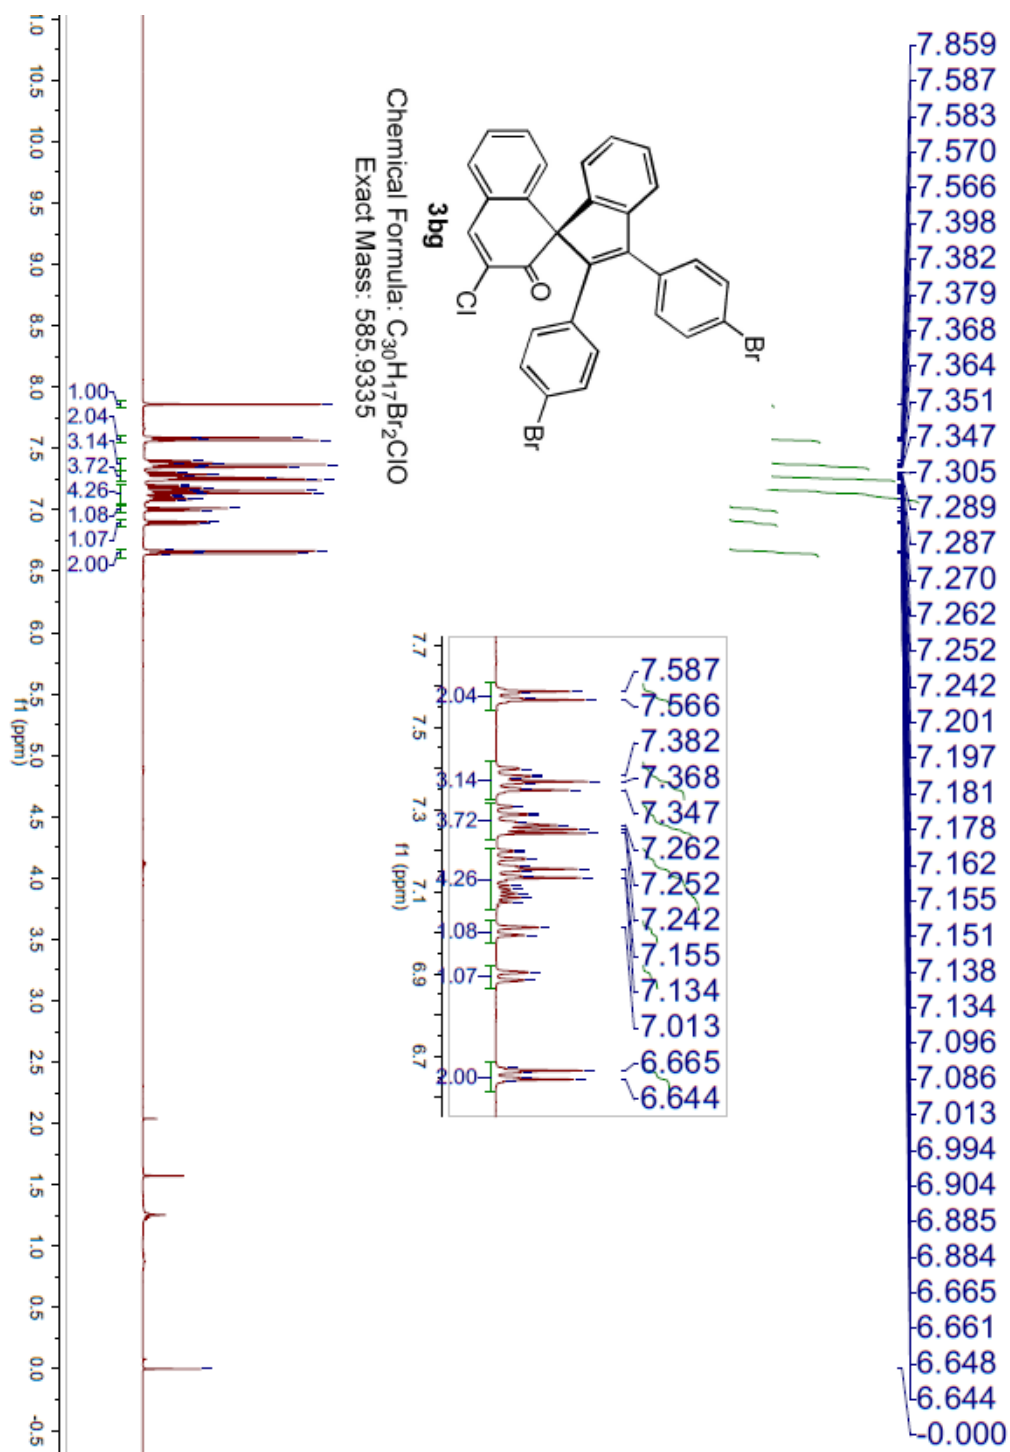



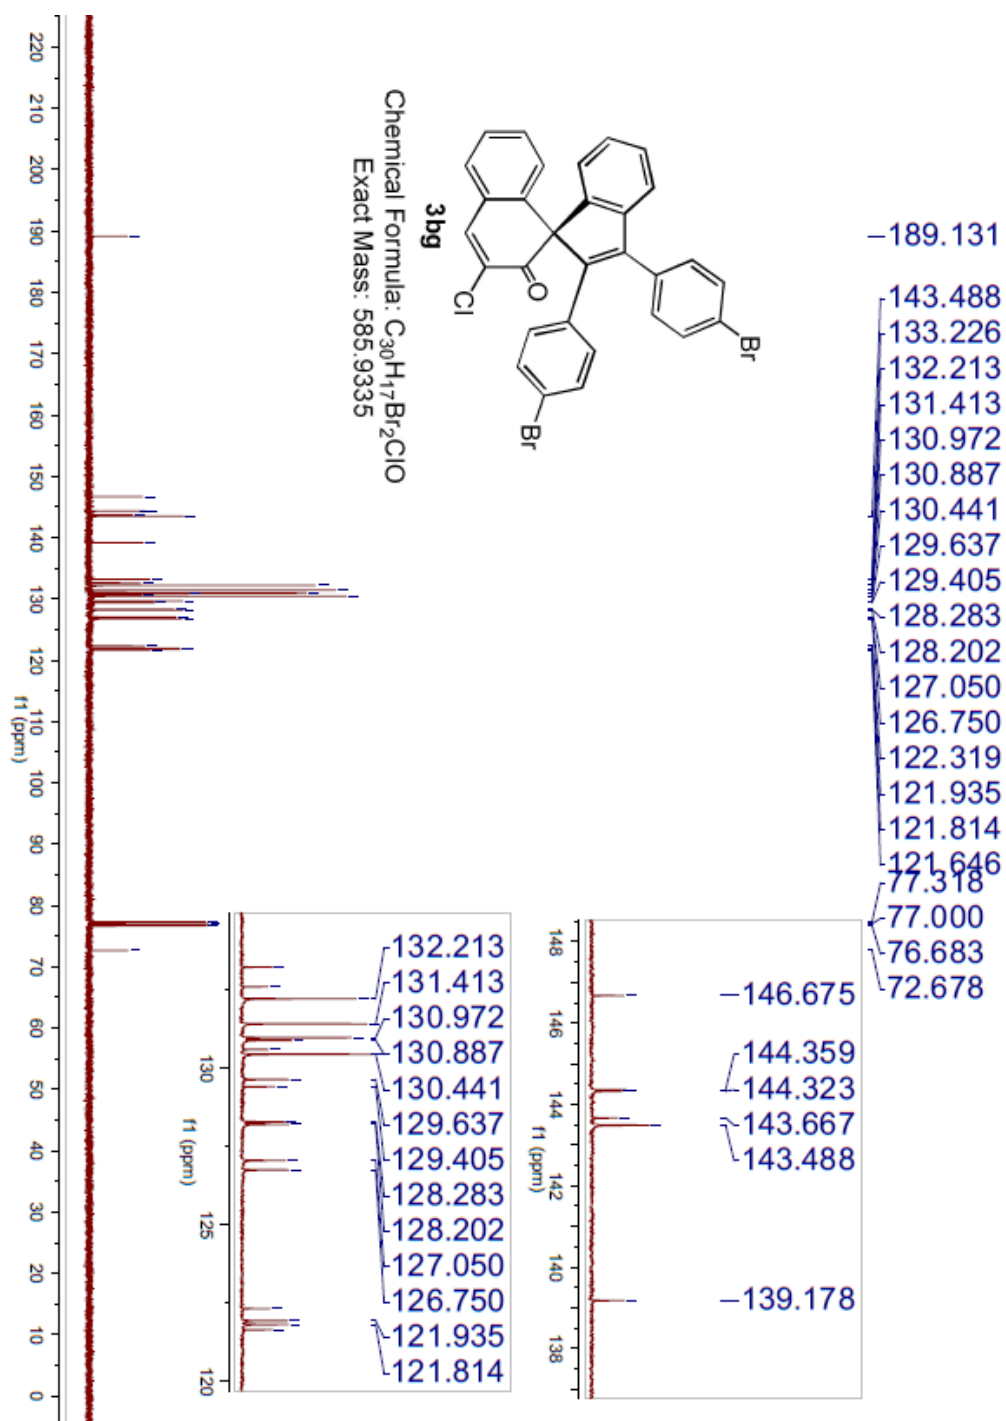

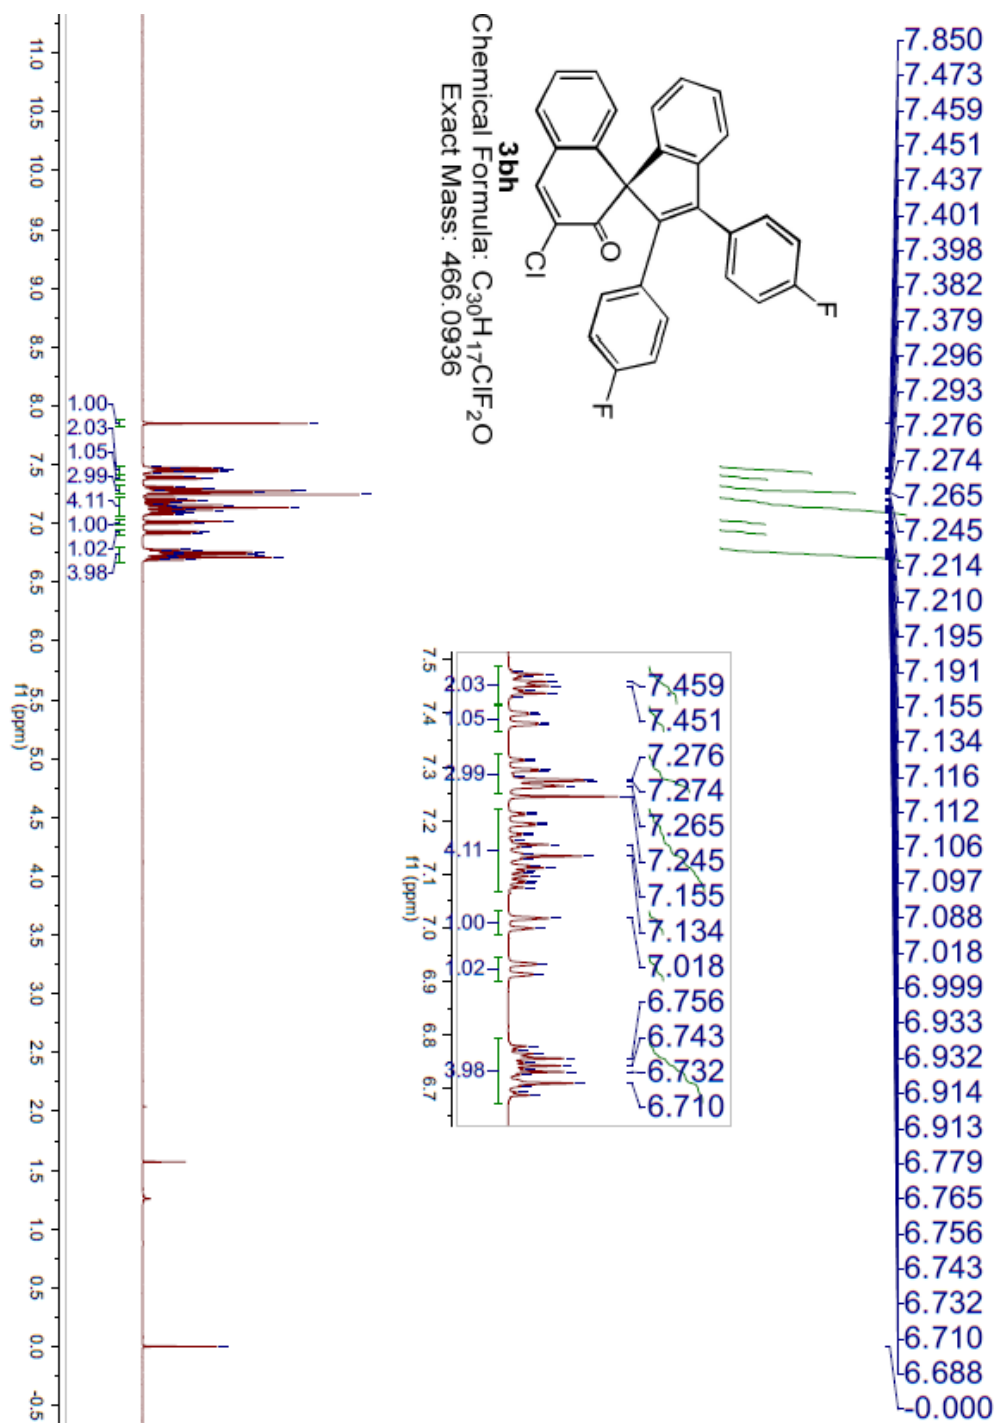

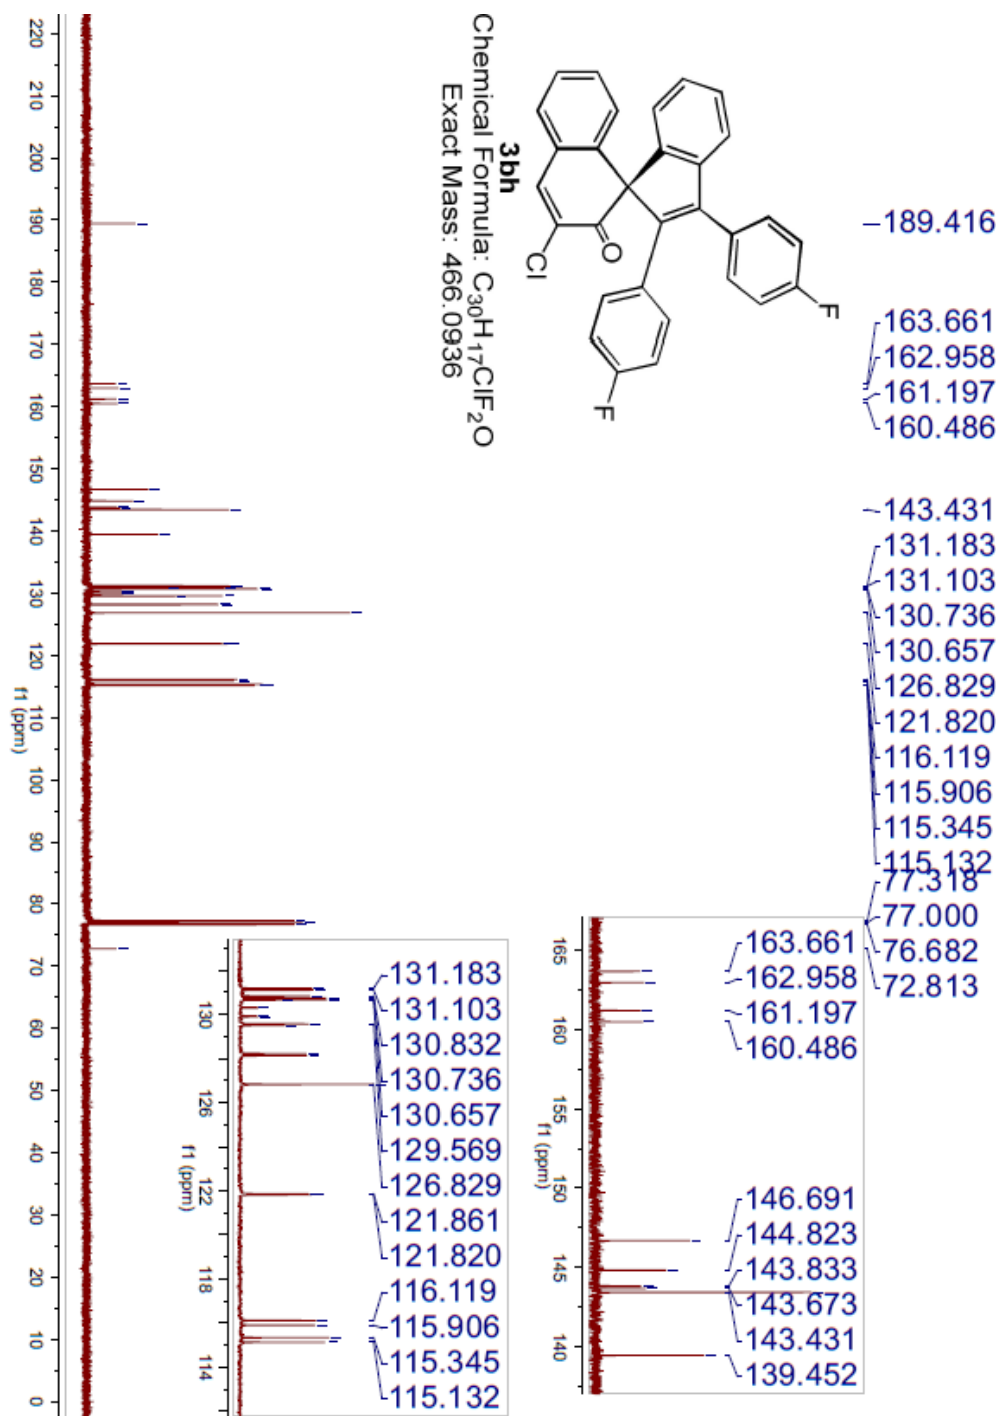

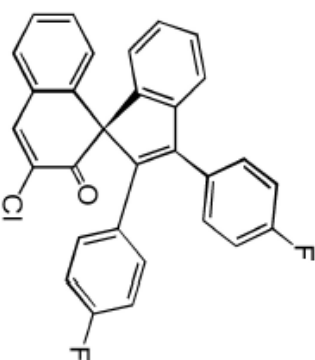

**3bh**  
 Chemical Formula:  $C_{30}H_{17}ClF_2O$   
 Exact Mass: 466.0936

113.076  
 113.091  
 113.100  
 113.105  
 113.114  
 113.123  
 113.128  
 113.137  
 113.151  
 113.501  
 113.515  
 113.523  
 113.530  
 113.538  
 113.545  
 113.552  
 113.560  
 113.575

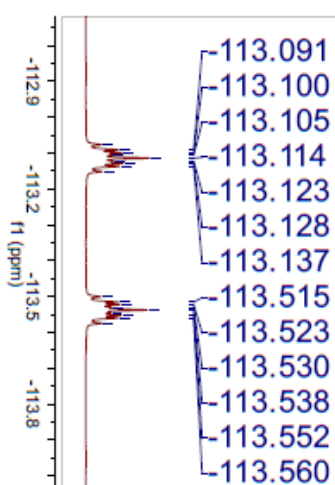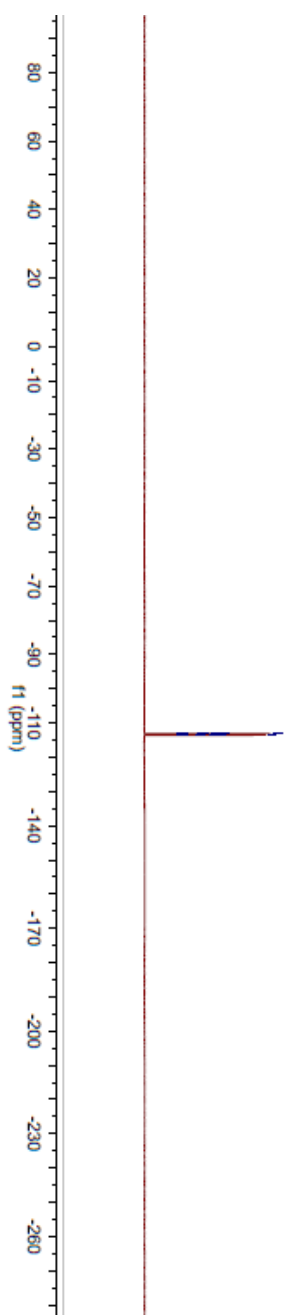

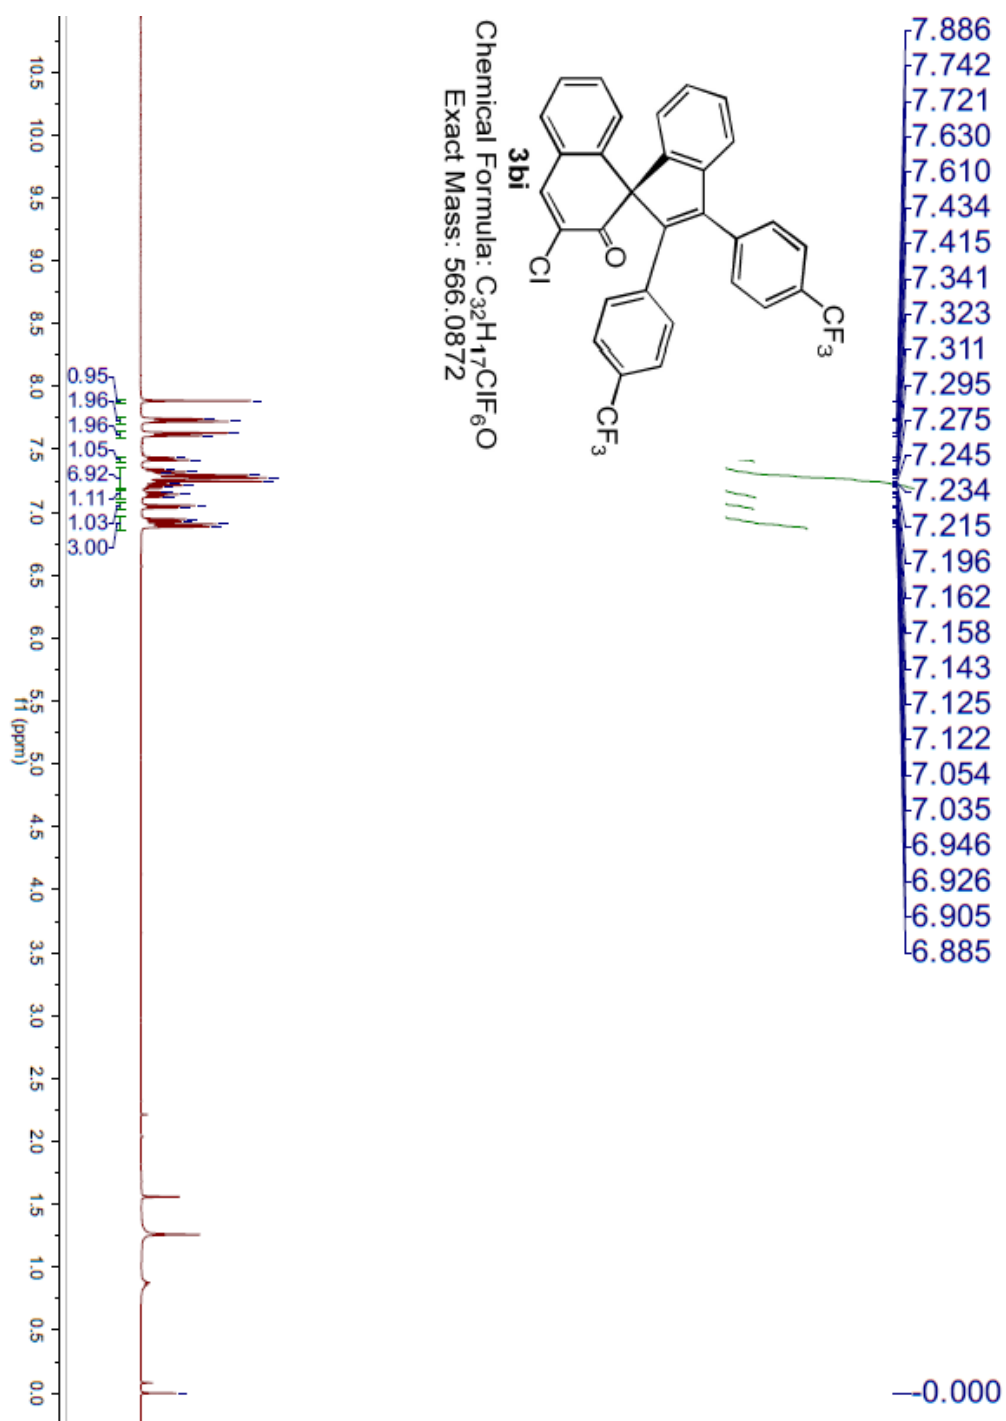

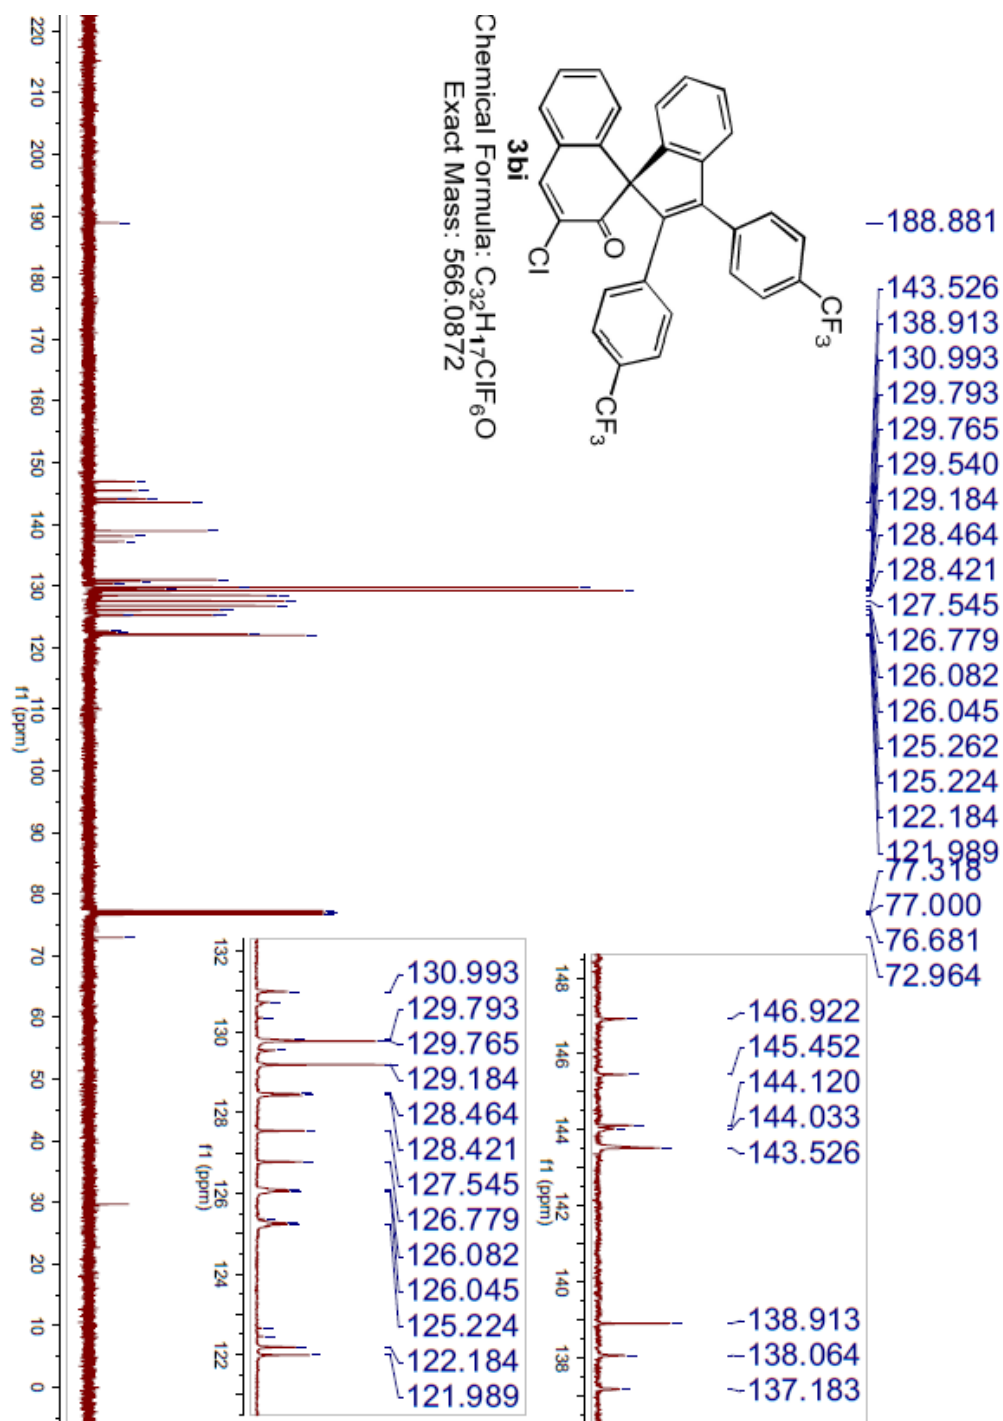

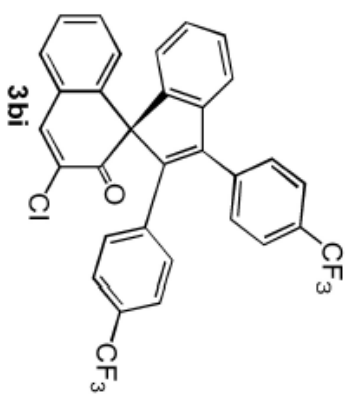

Chemical Formula:  $C_{32}H_{17}ClF_6O$   
Exact Mass: 566.0872

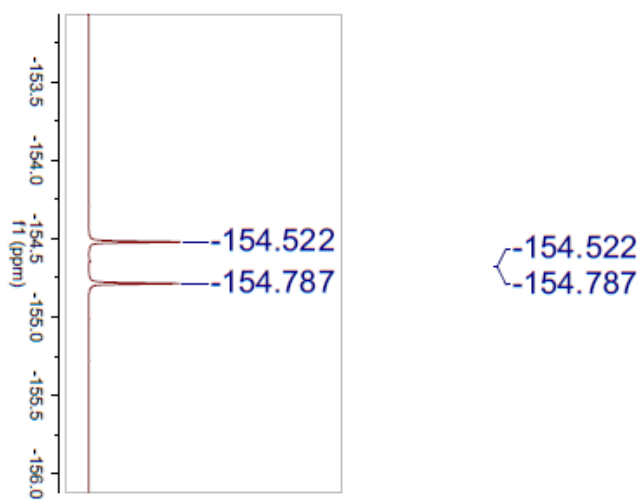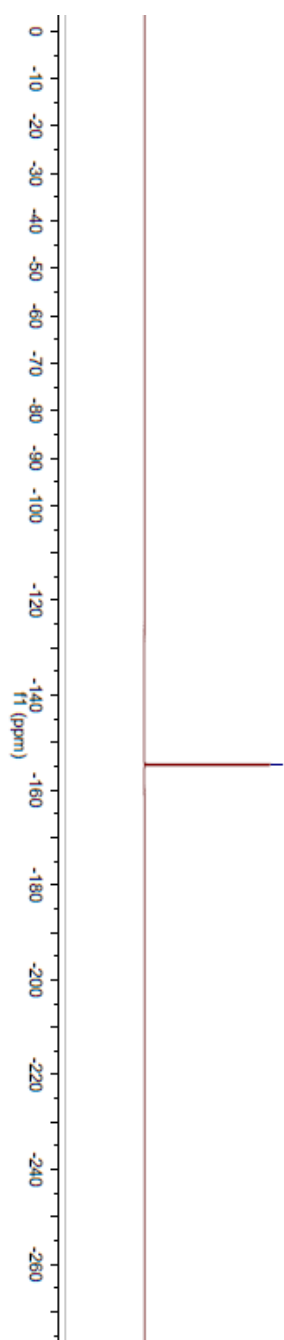

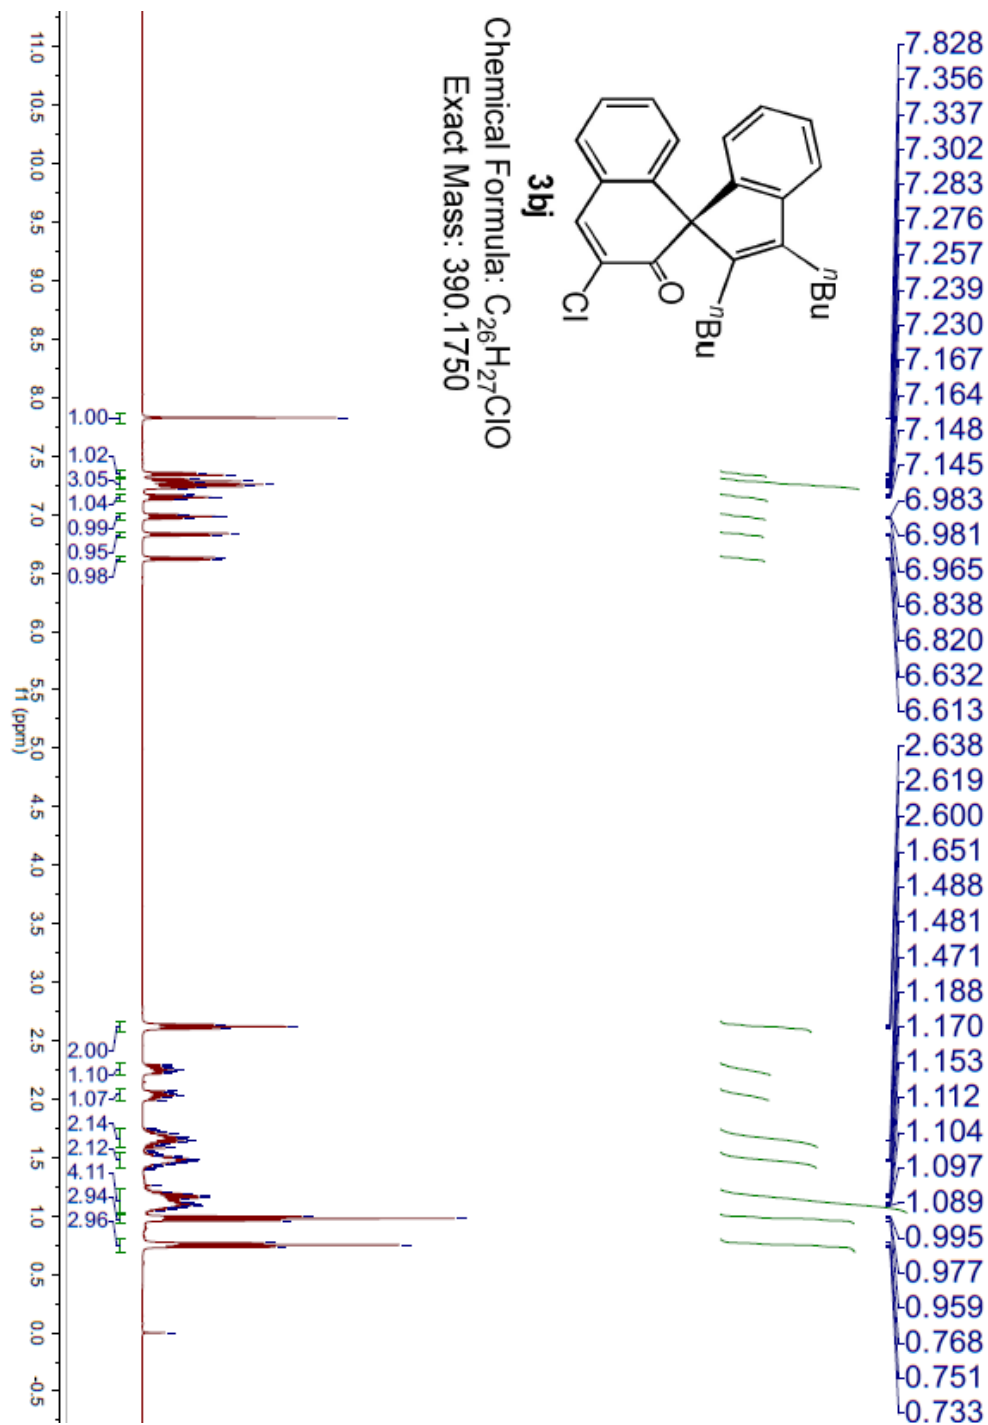



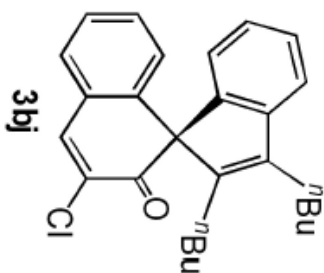

**3bj**

Chemical Formula:  $C_{26}H_{27}ClO$   
Exact Mass: 390.1750

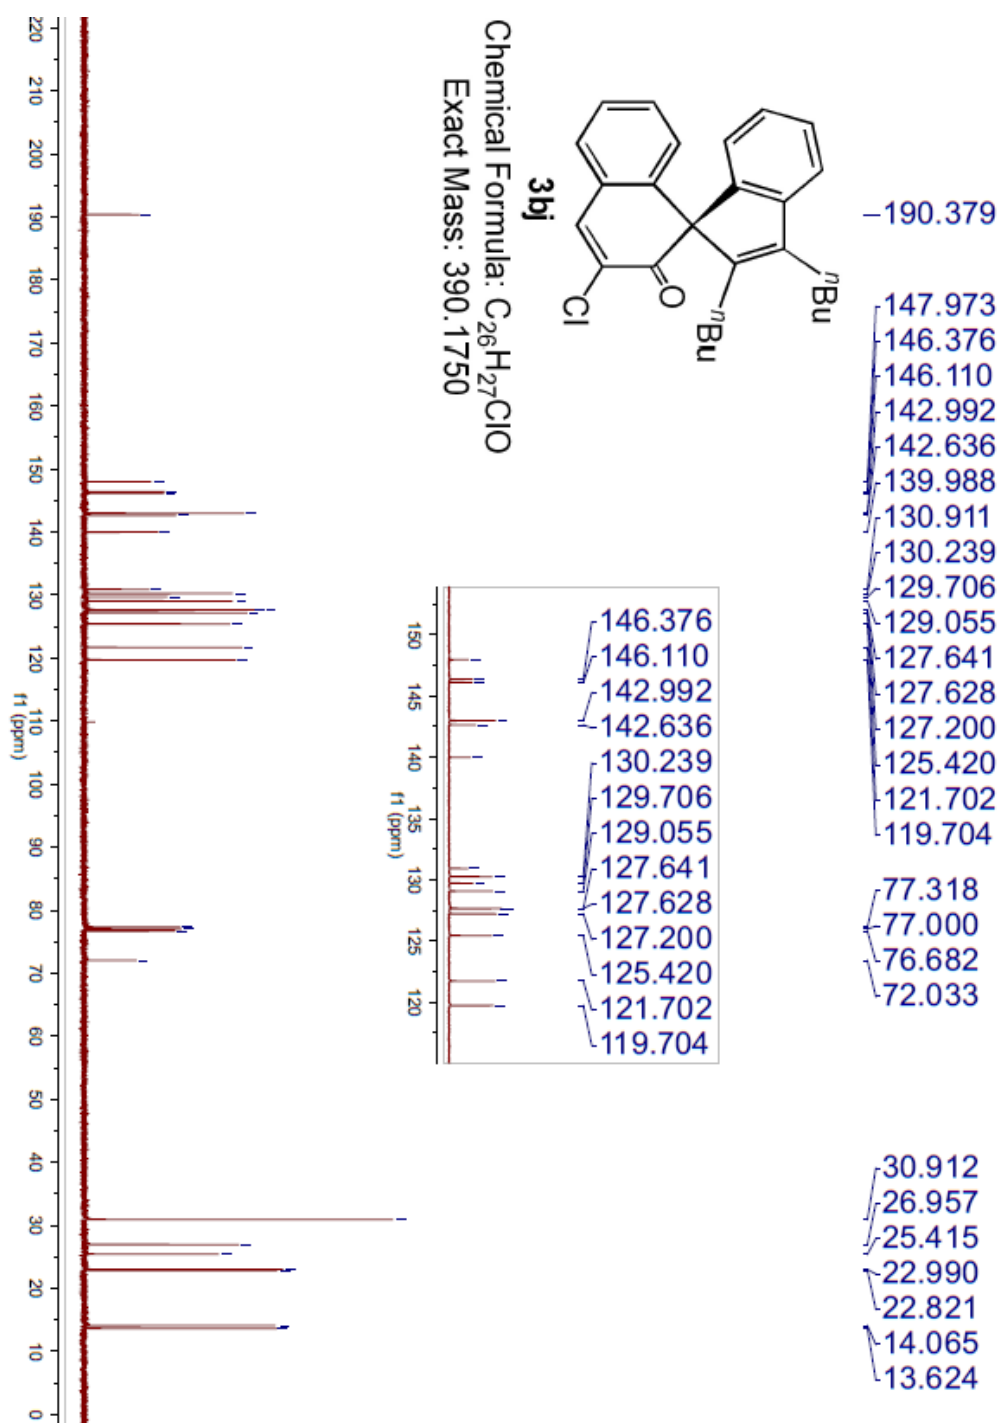

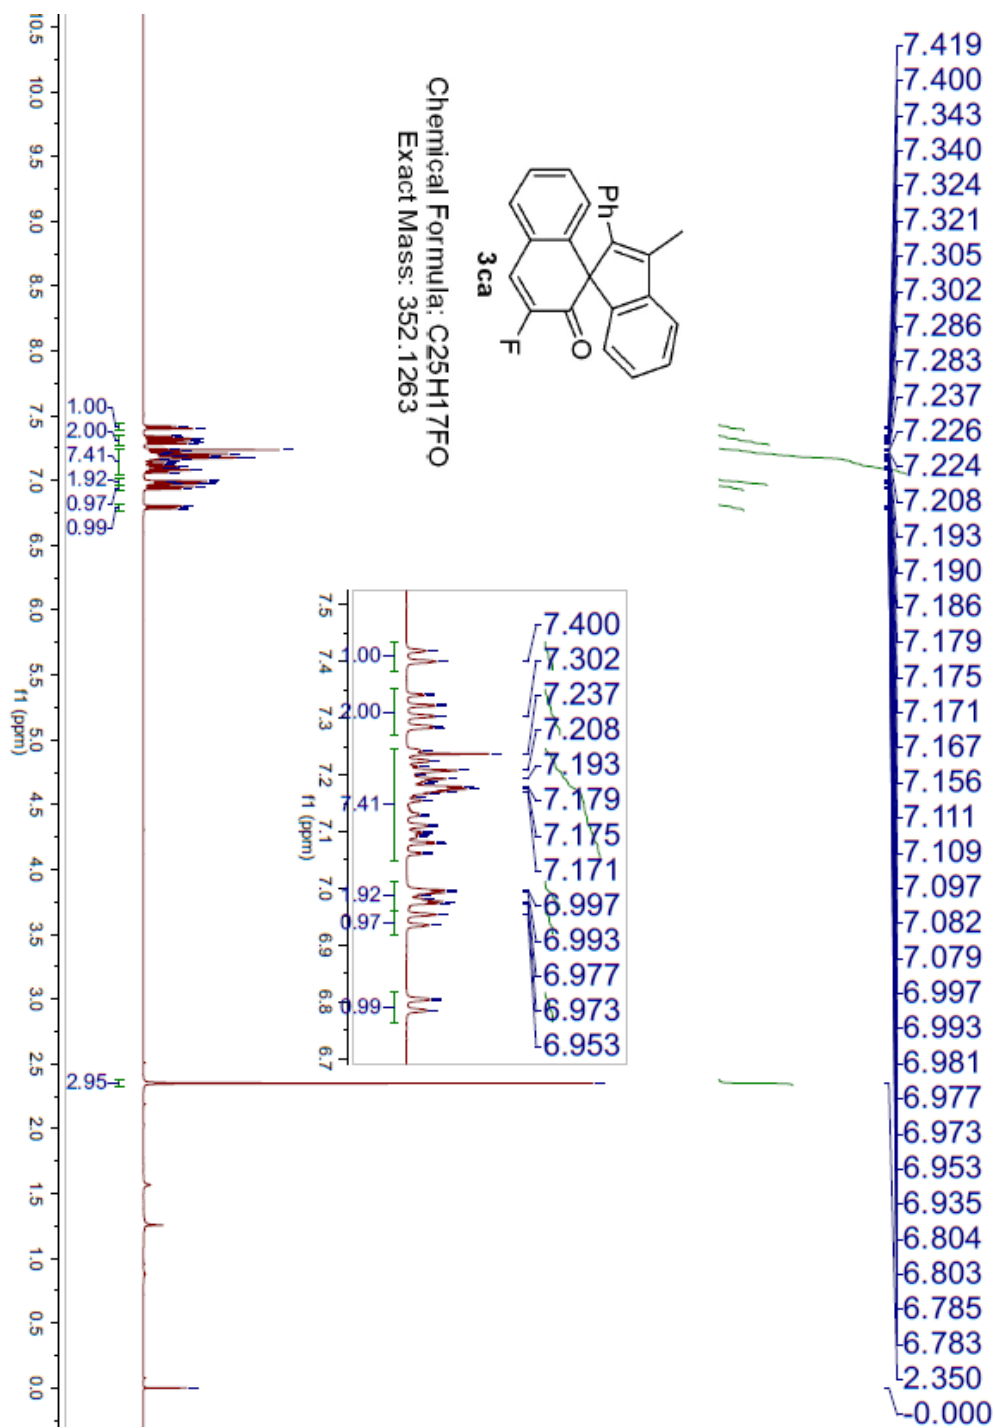

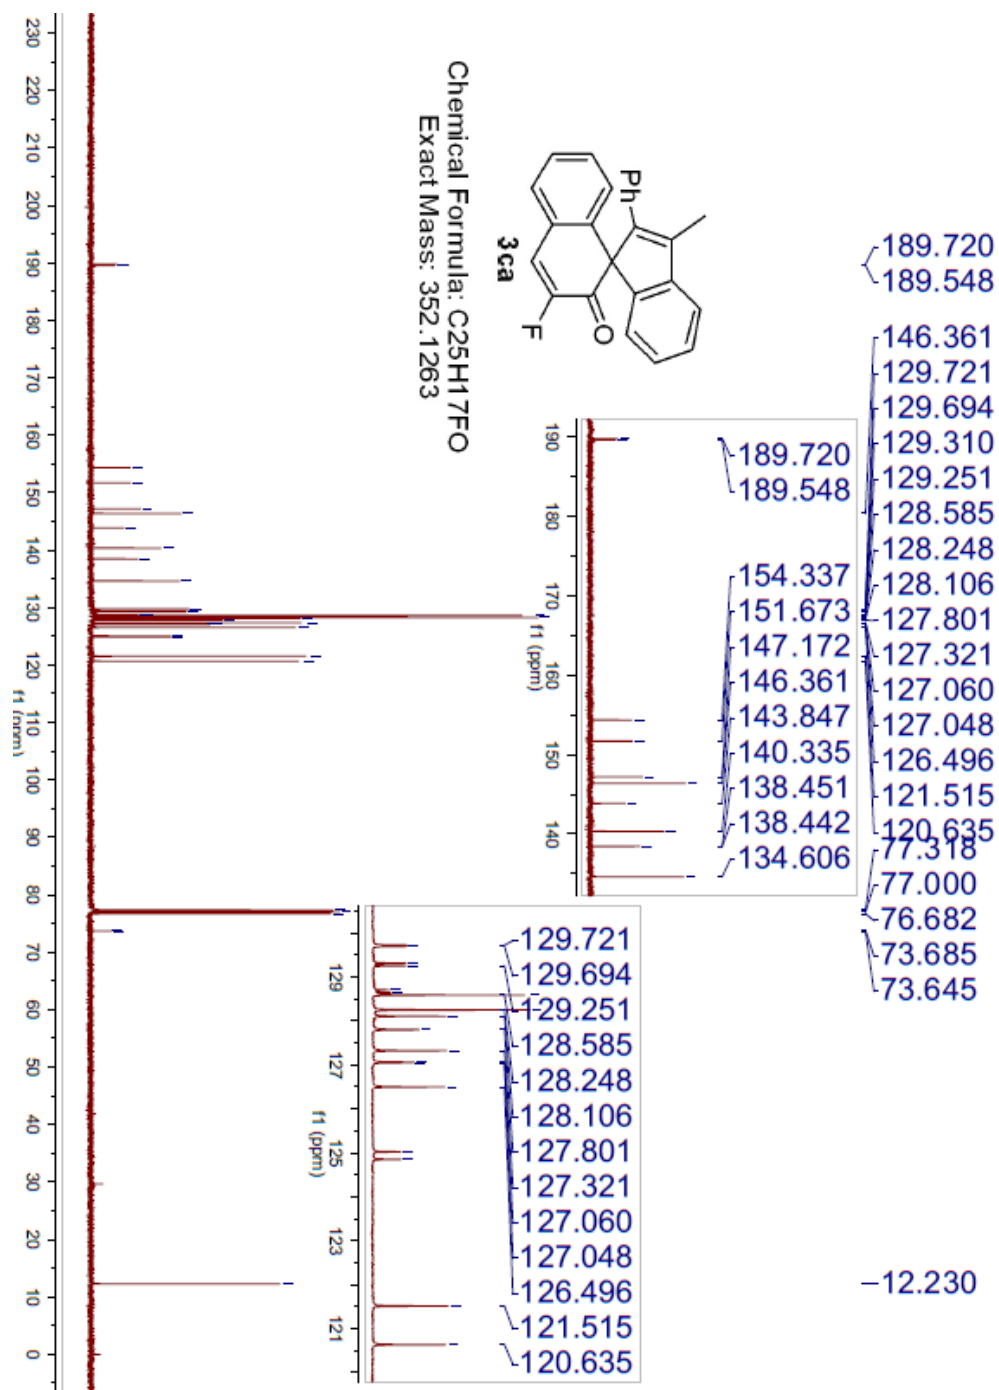

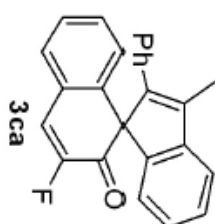

Chemical Formula: C<sub>25</sub>H<sub>17</sub>FO  
Exact Mass: 352.1263

130.772  
130.802

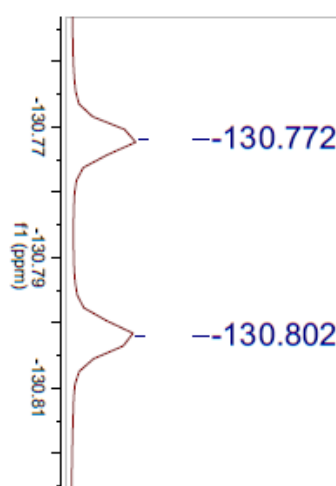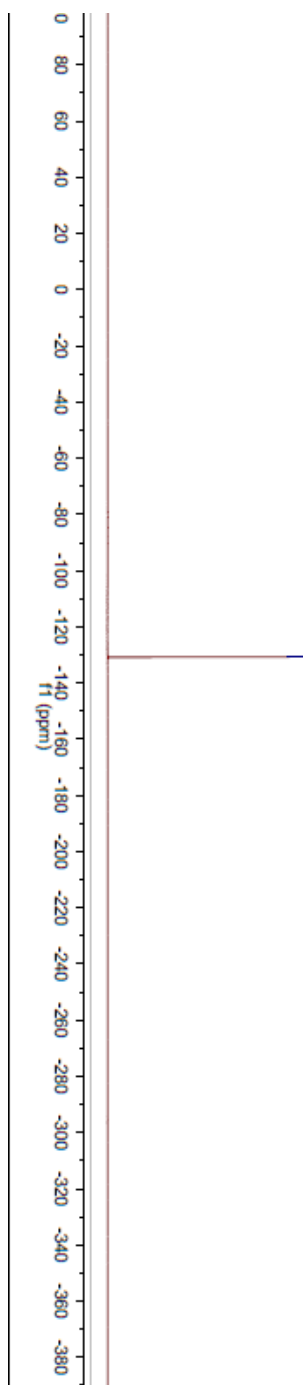

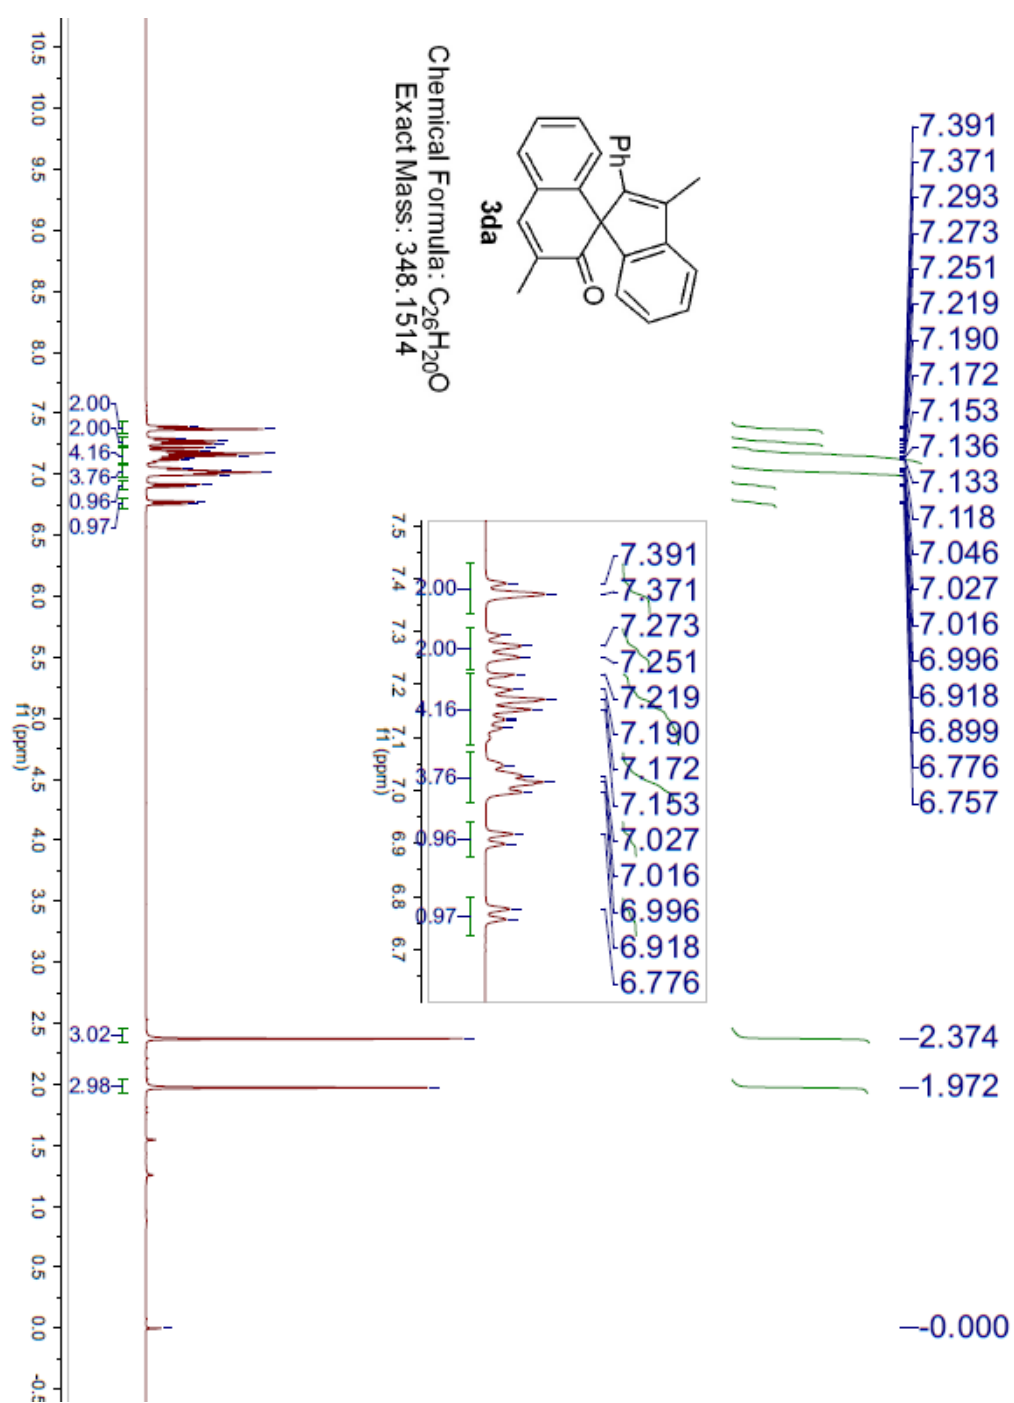

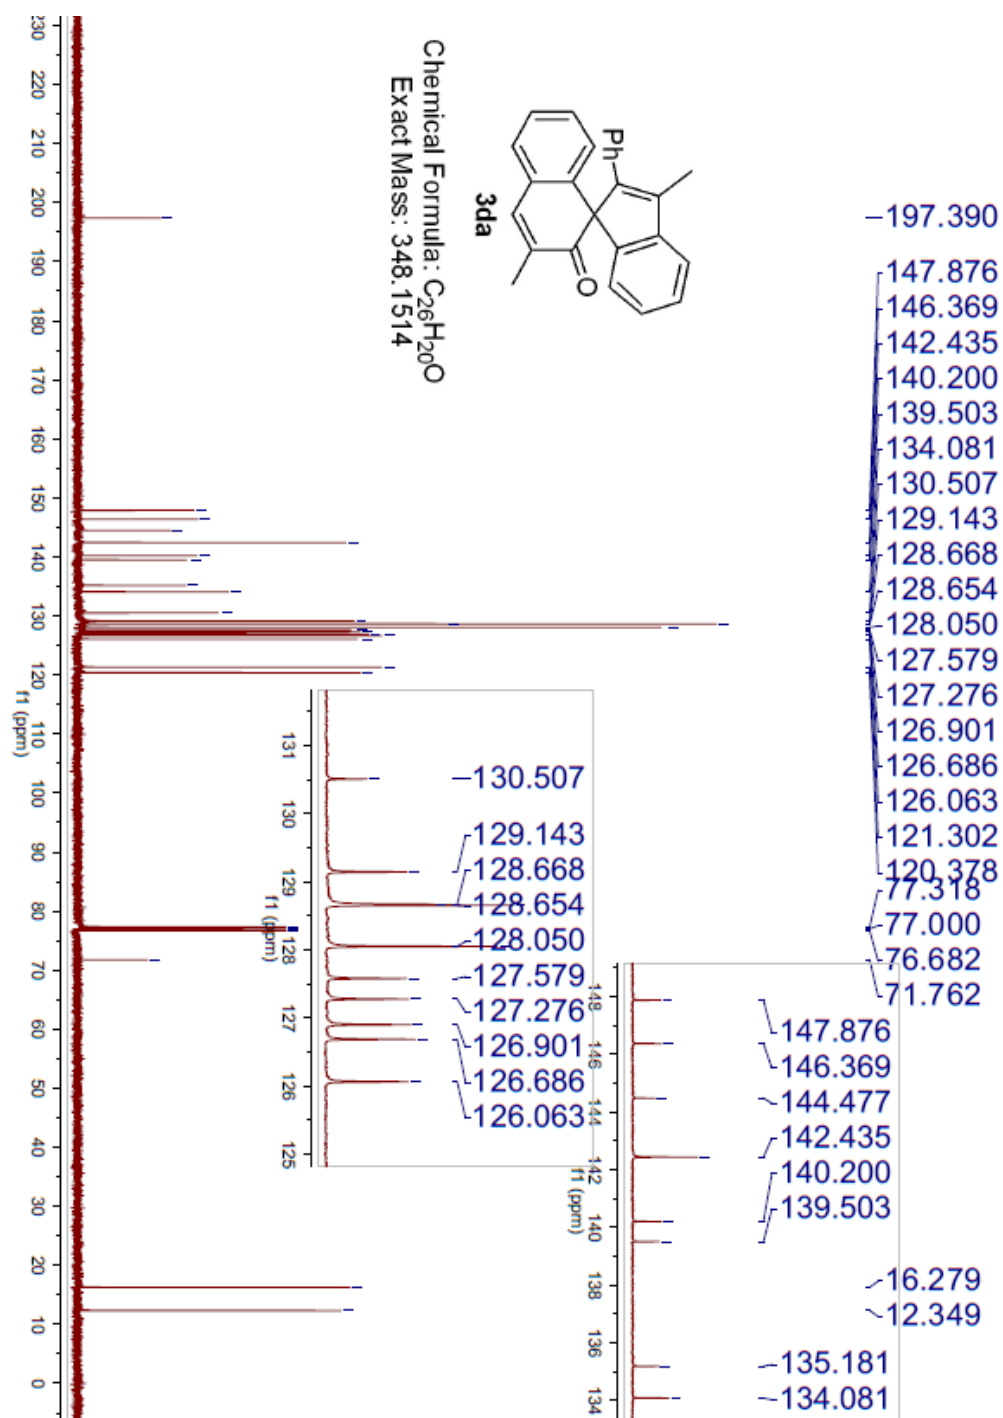

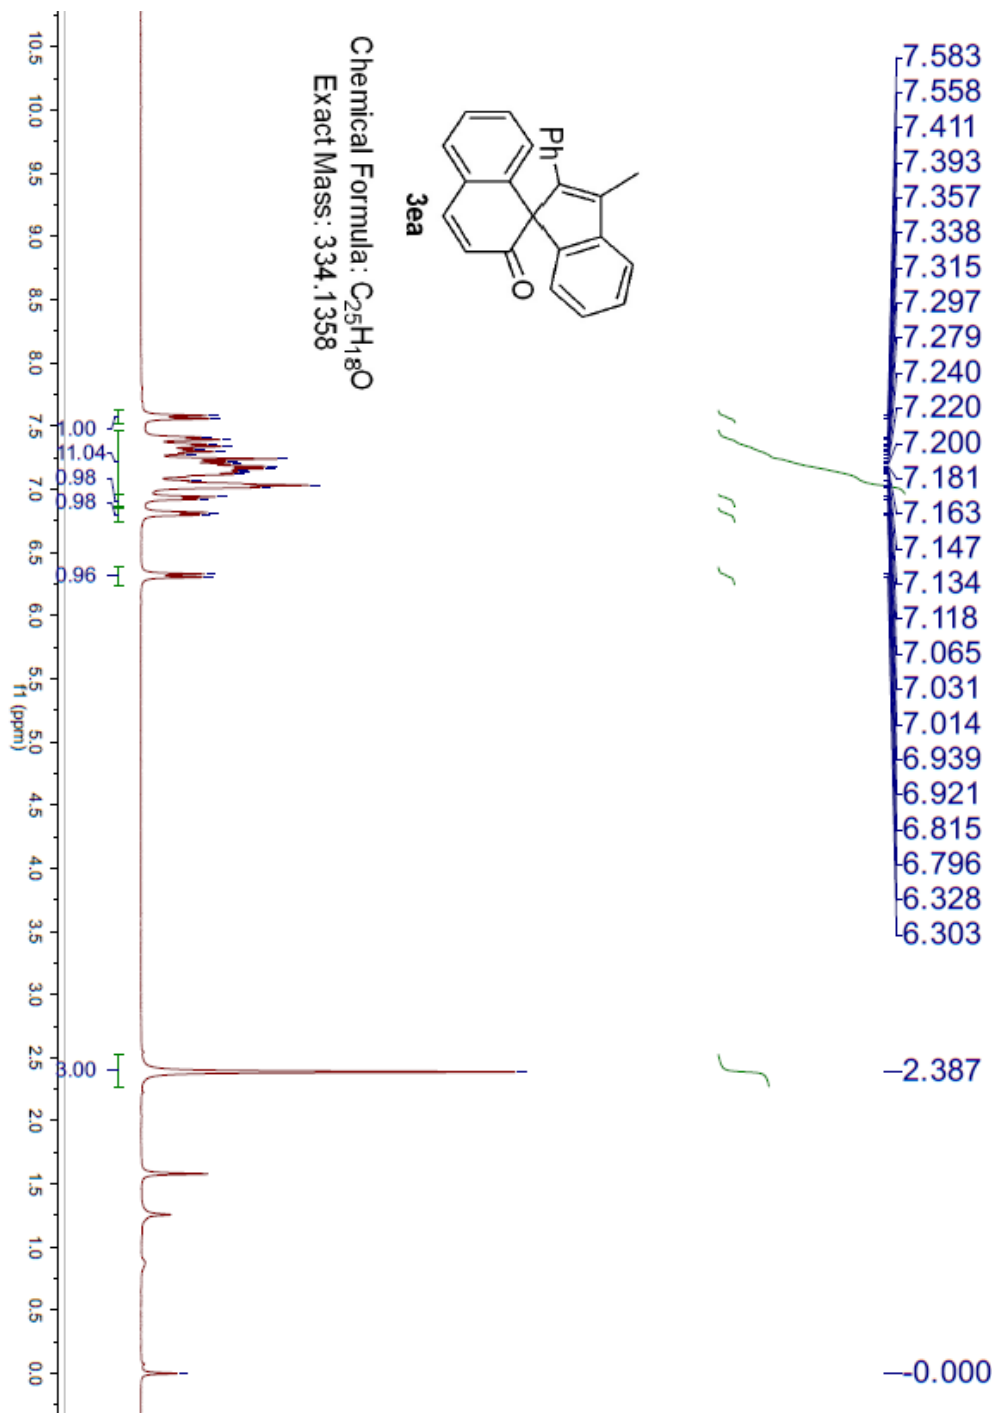

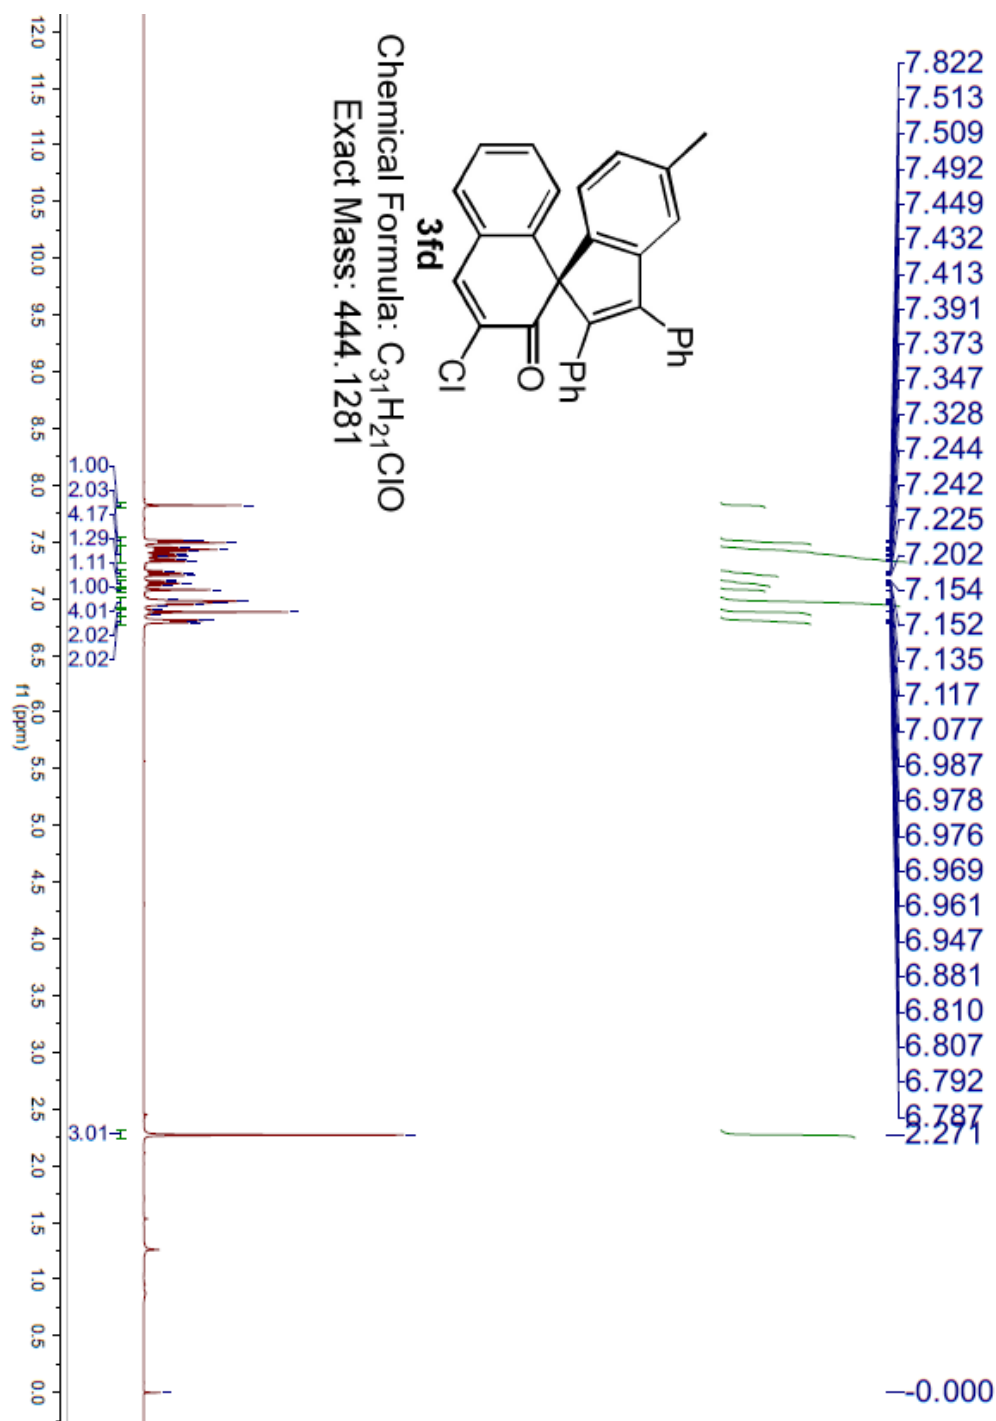



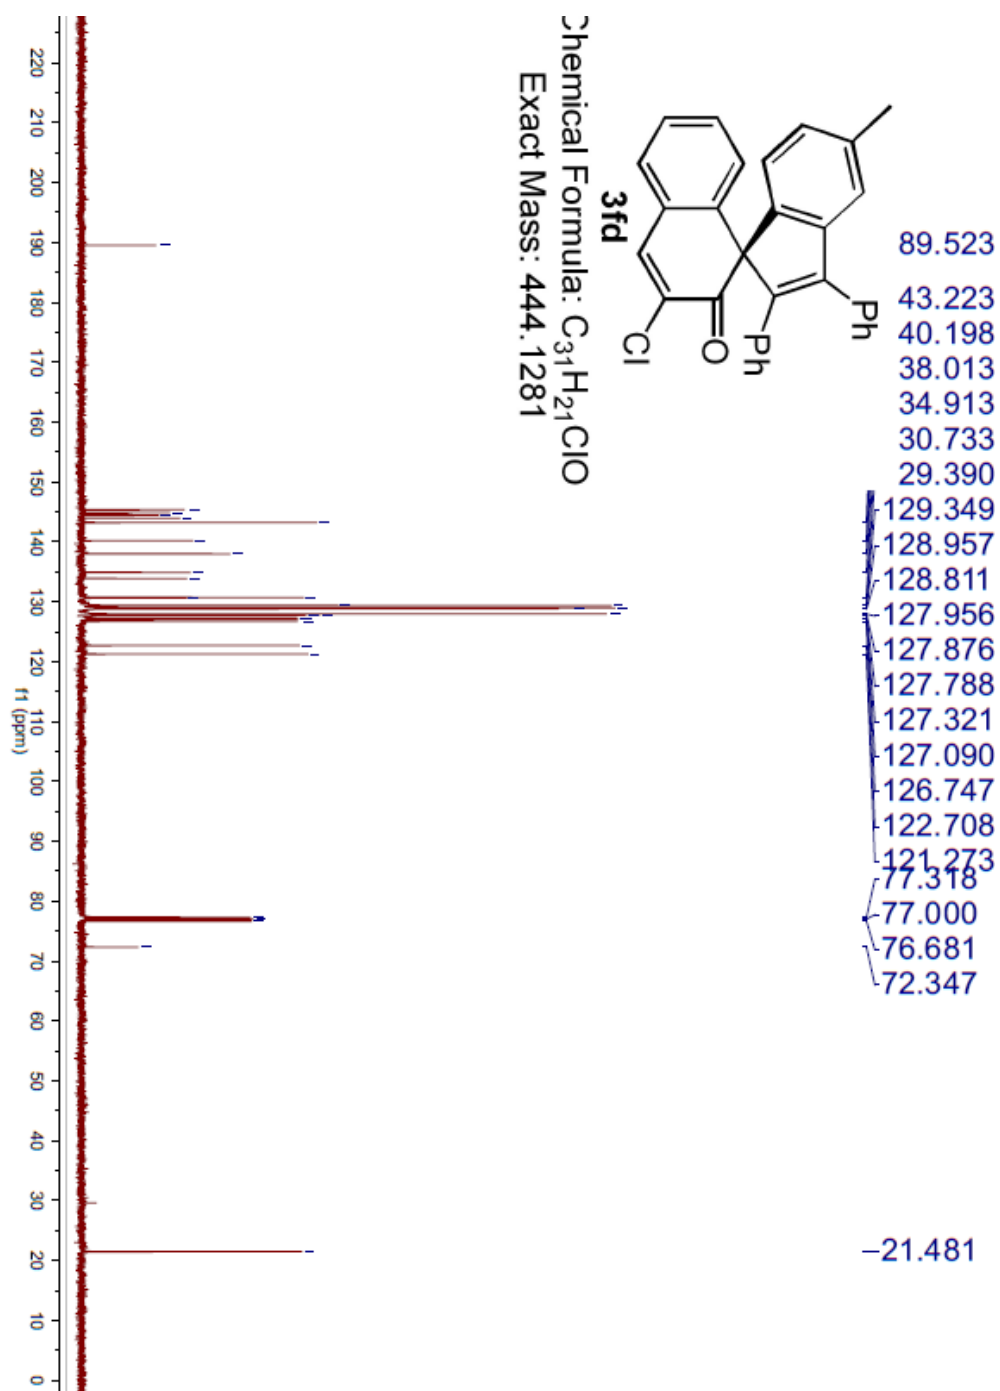

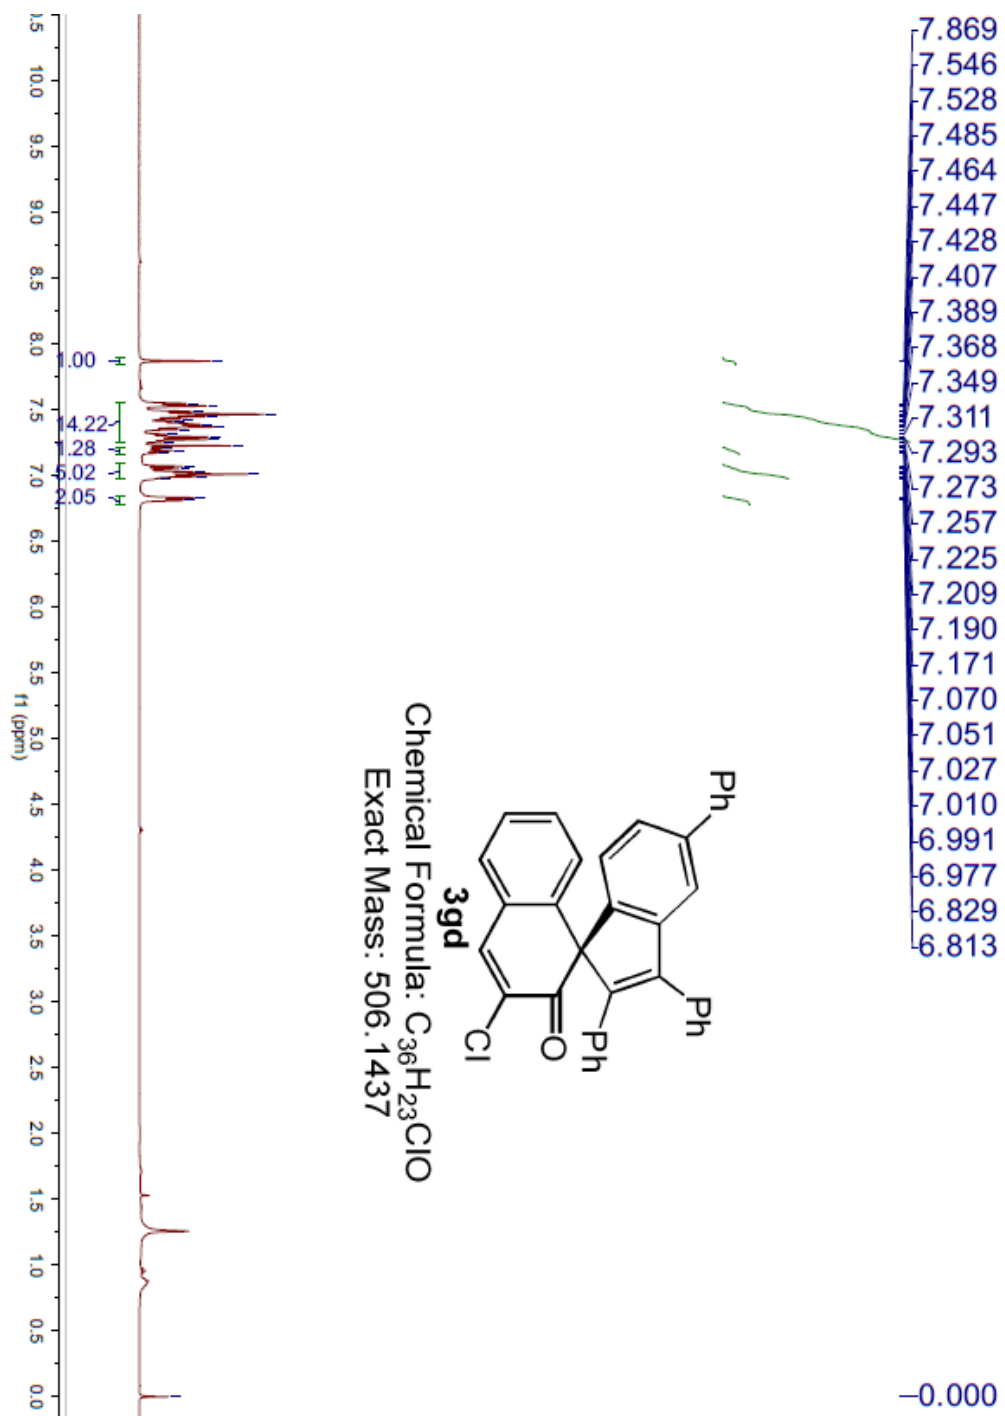

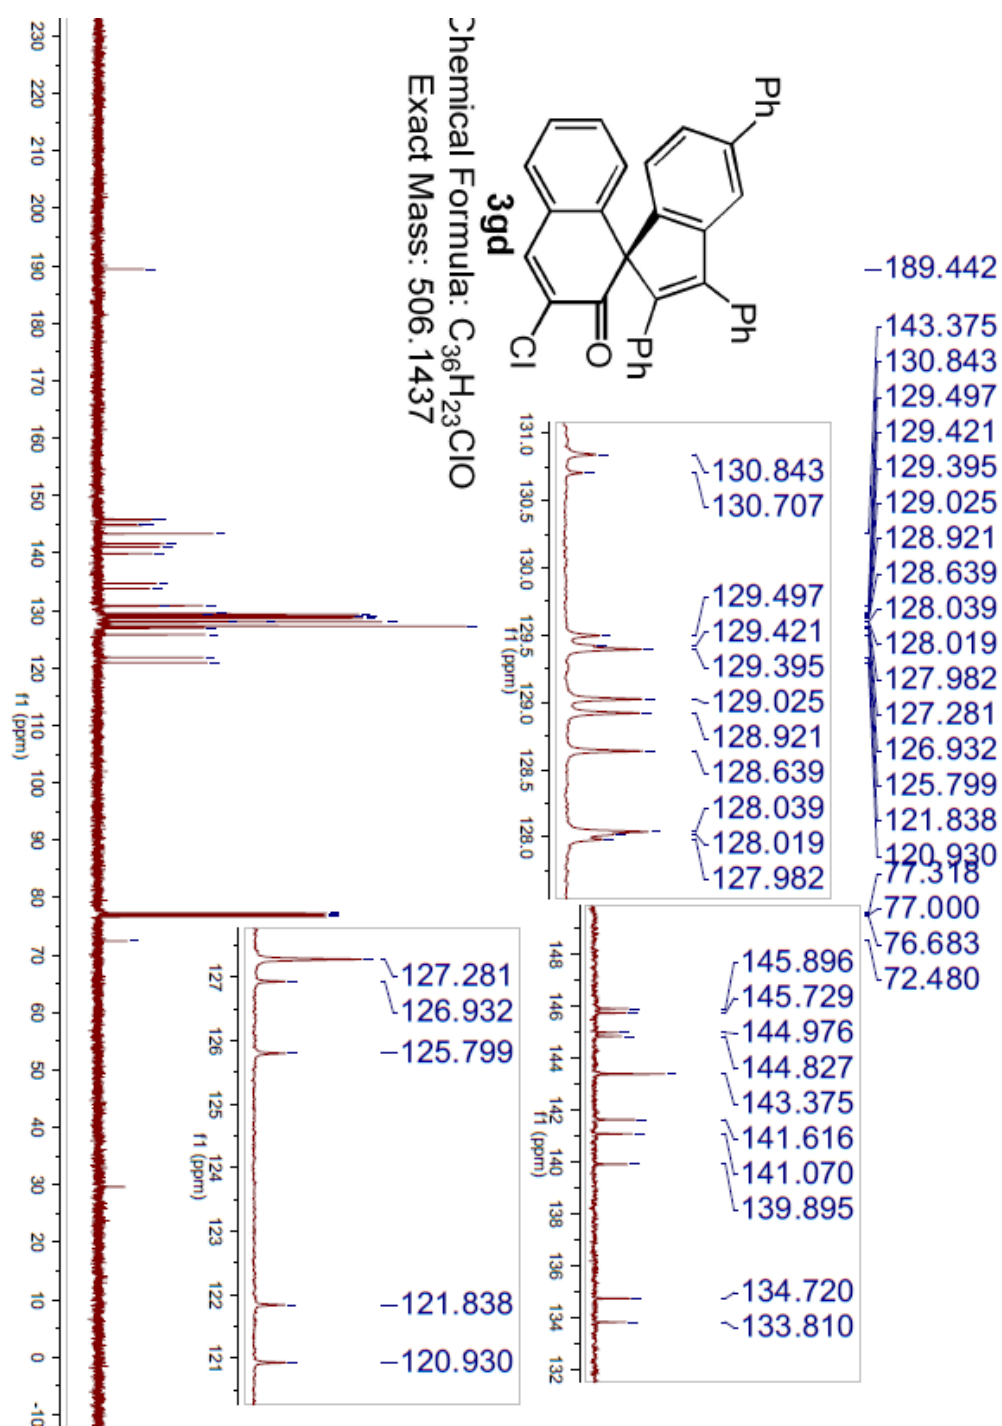

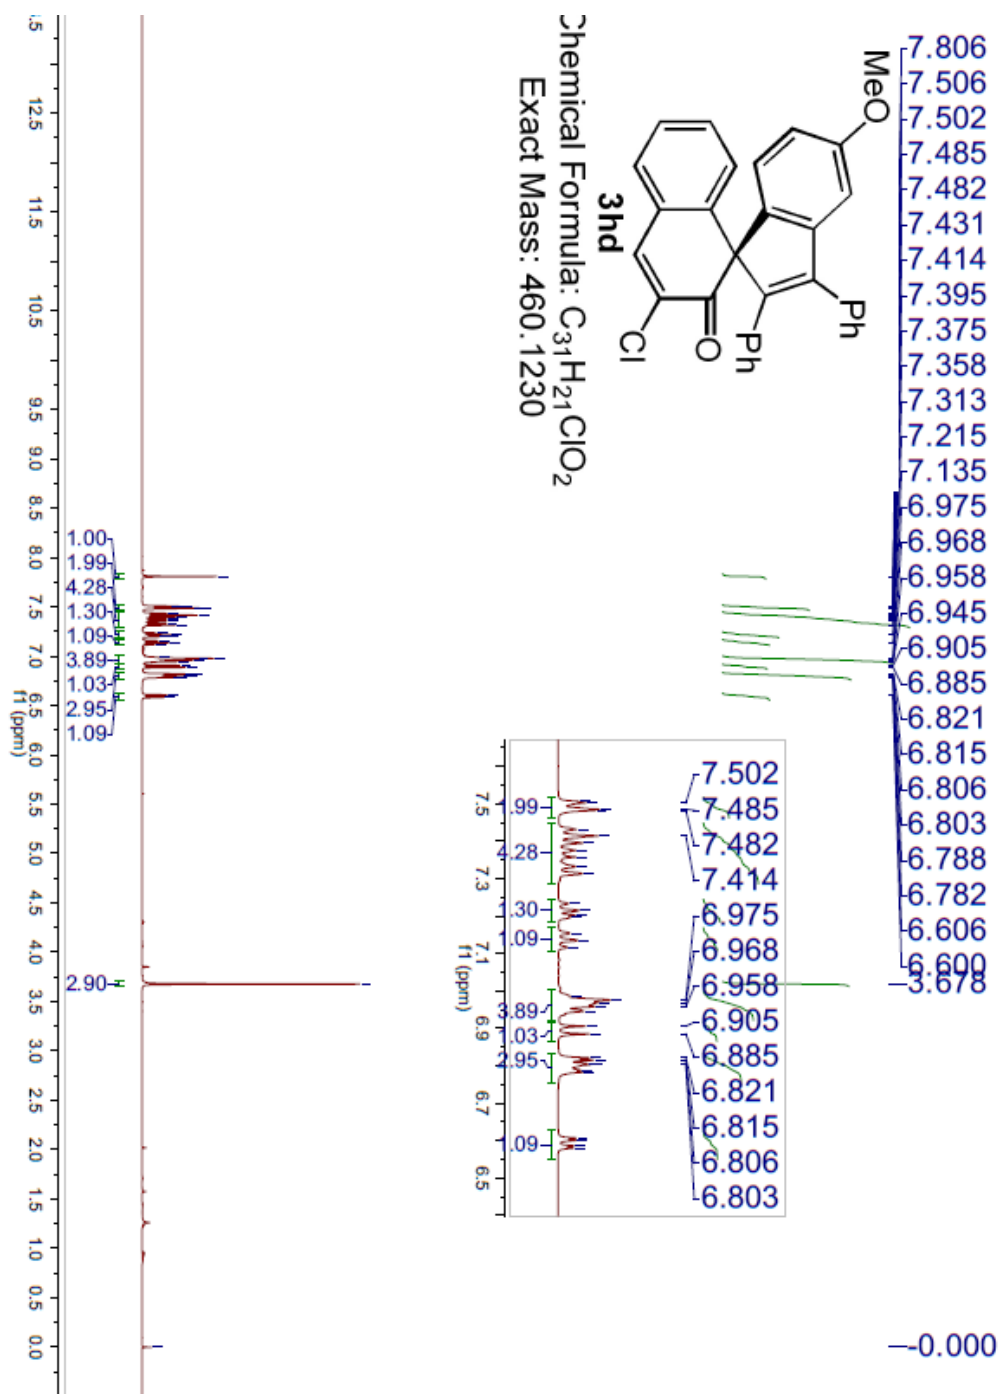

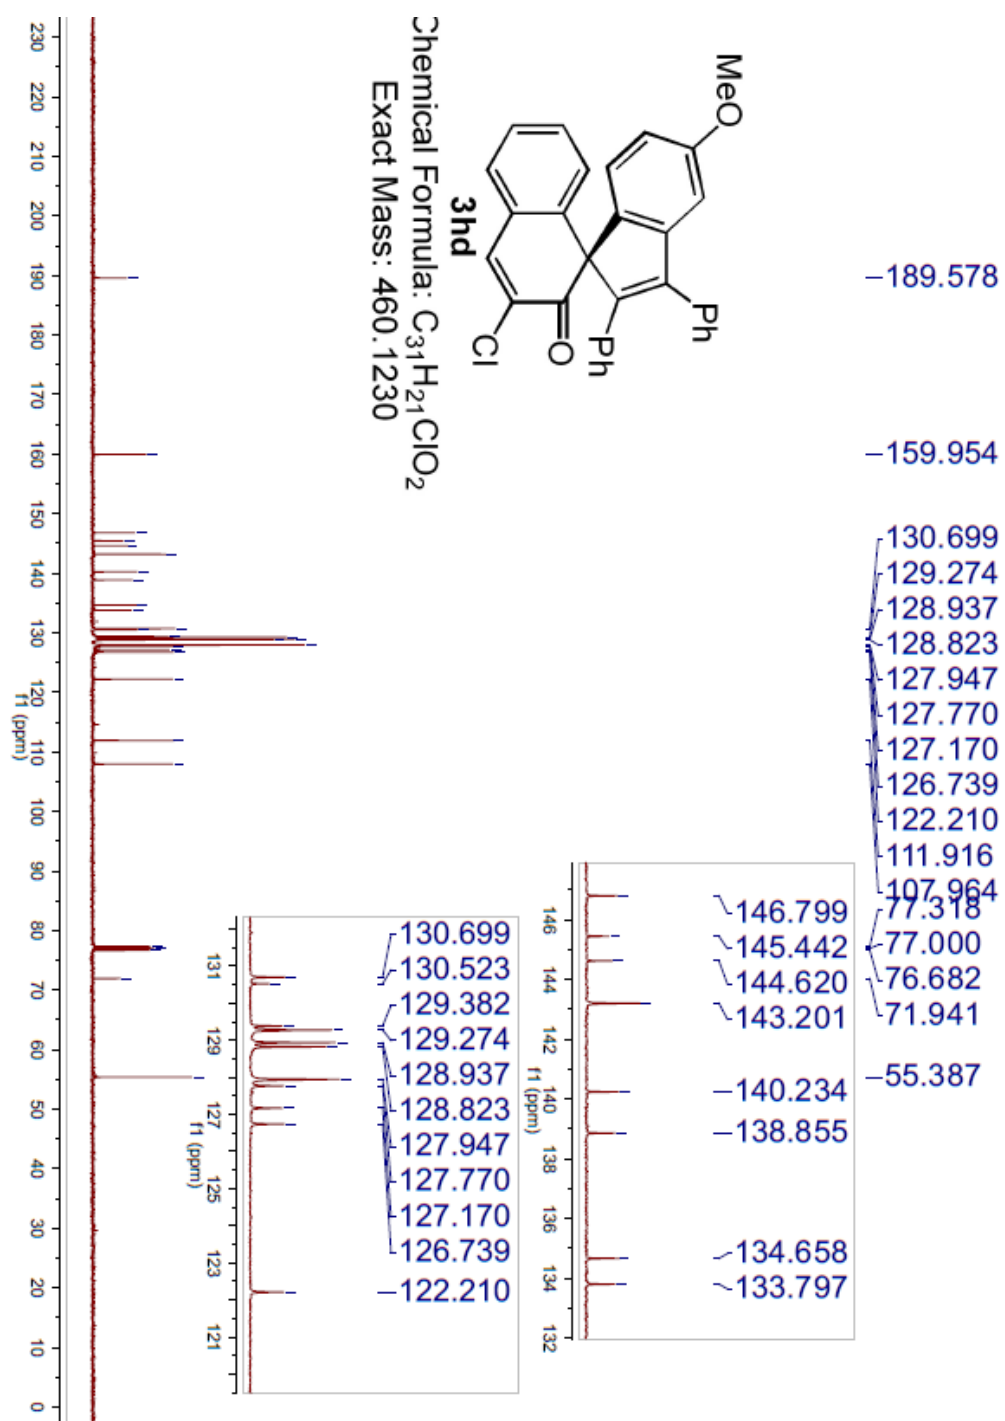

Chemical Formula:  $C_{30}H_{18}ClFO$   
 Exact Mass: 448.1030

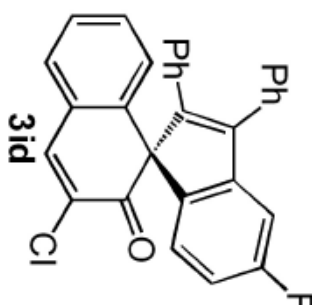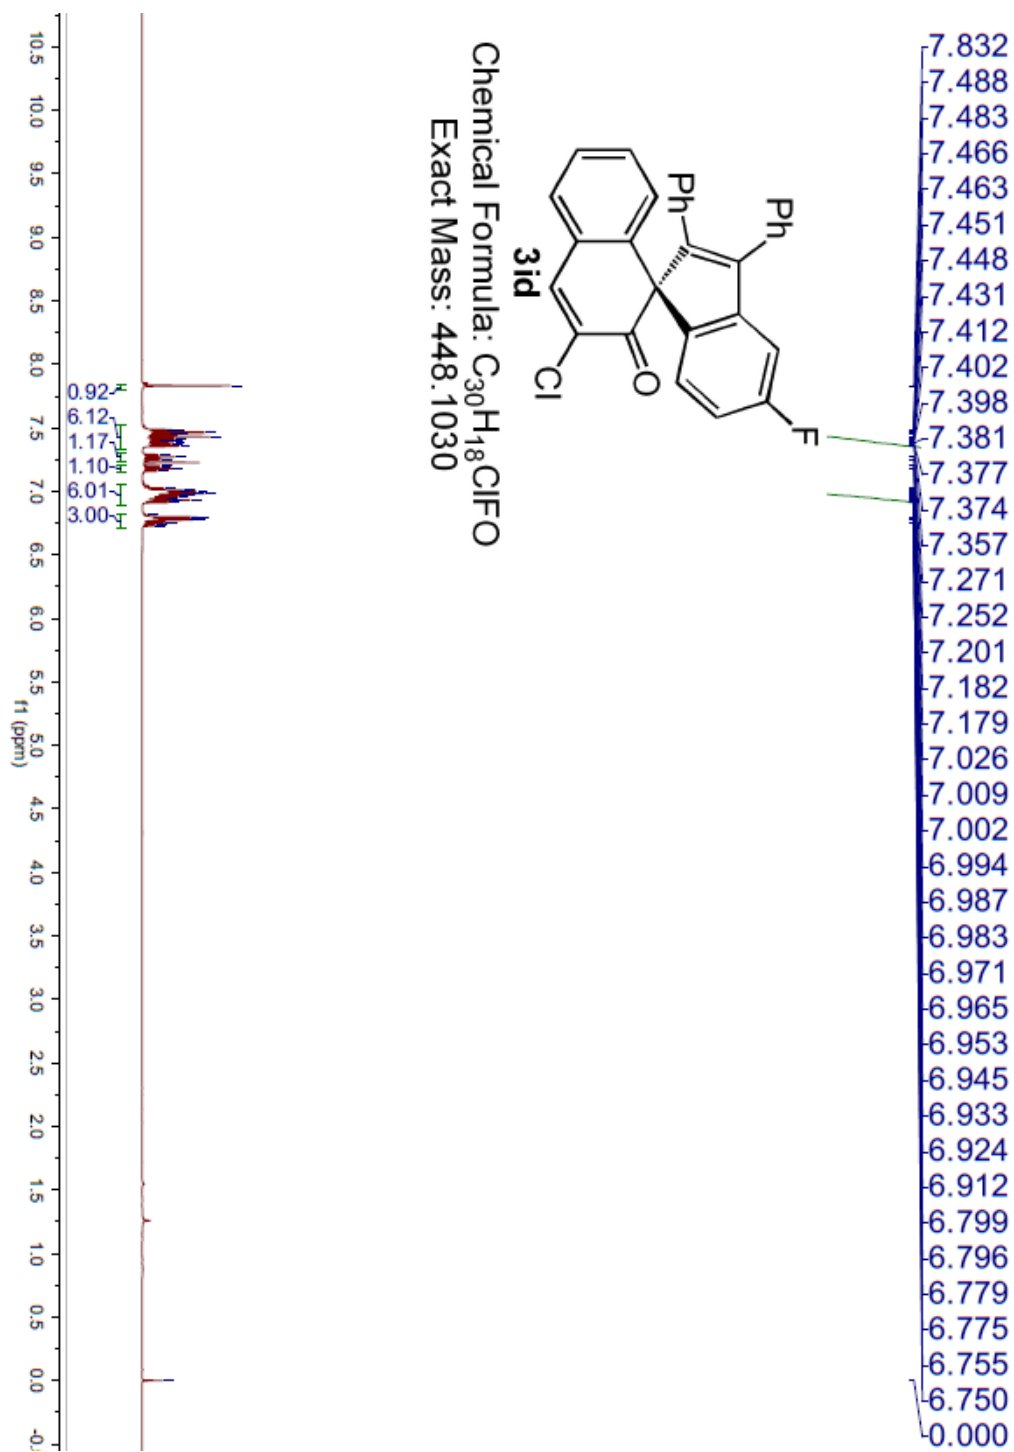

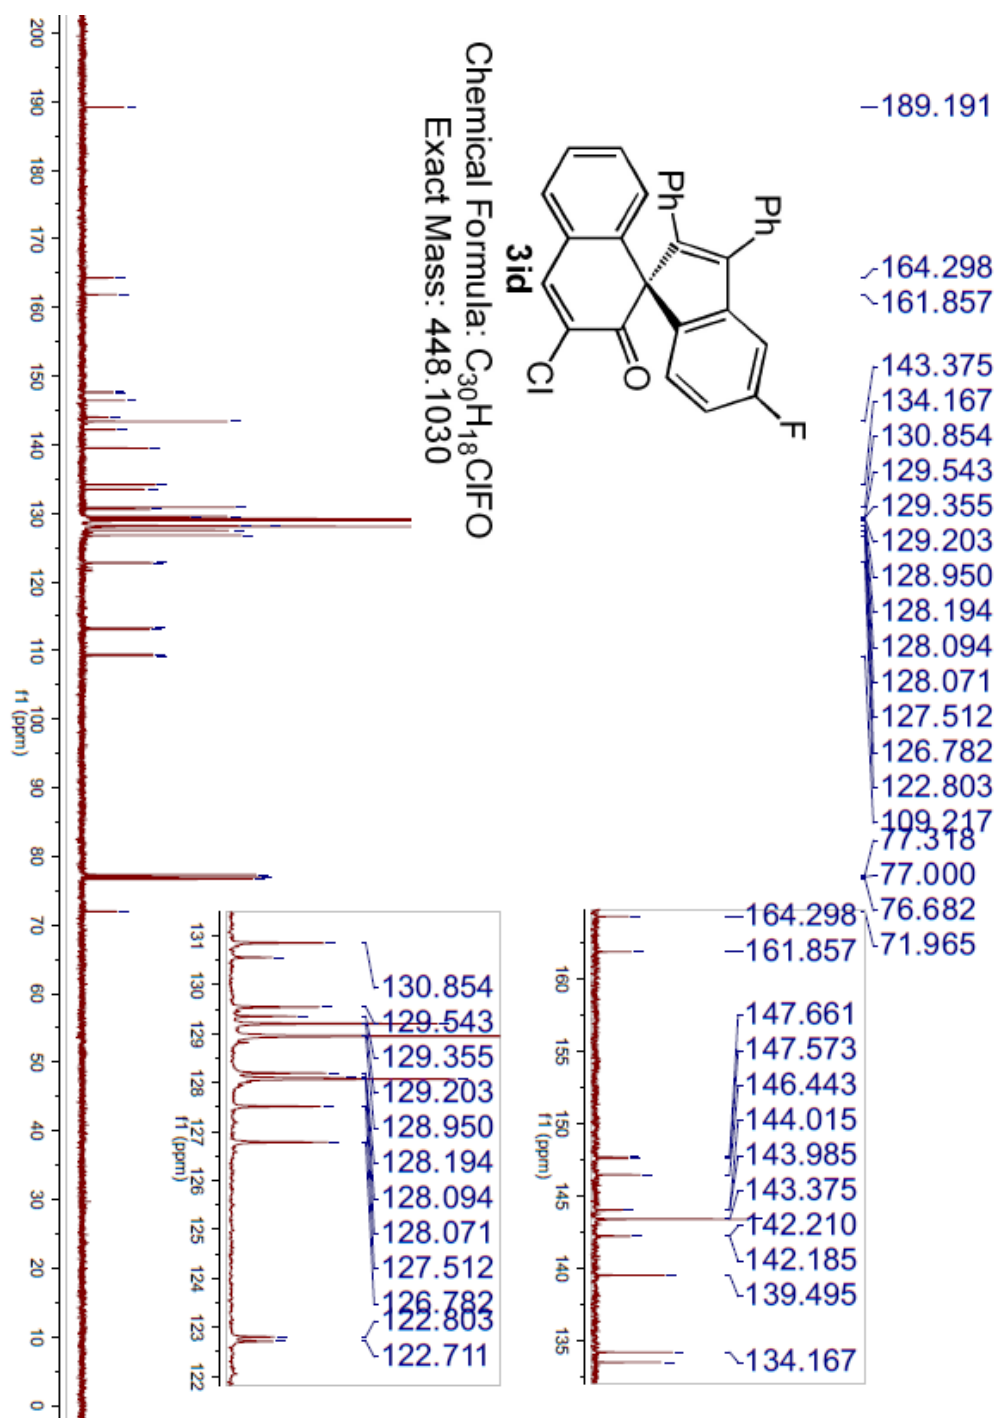

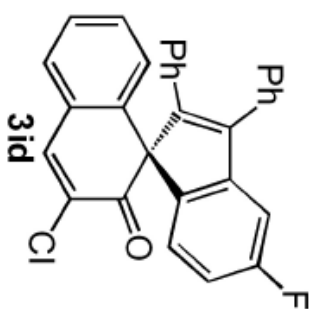

Chemical Formula:  $C_{30}H_{18}ClFO$   
 Exact Mass: 448.1030

113.463  
 113.476  
 113.487  
 113.500  
 113.511  
 113.524

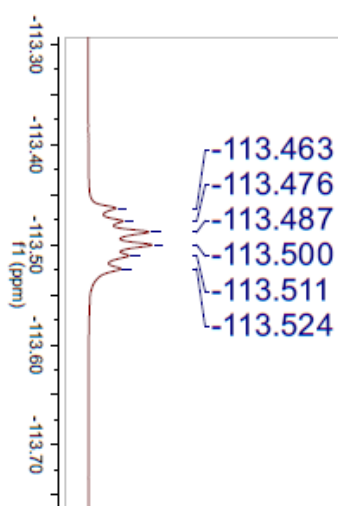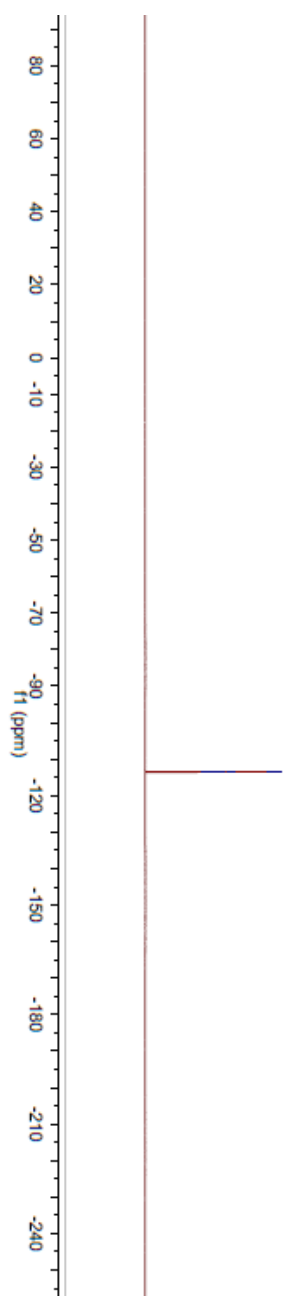



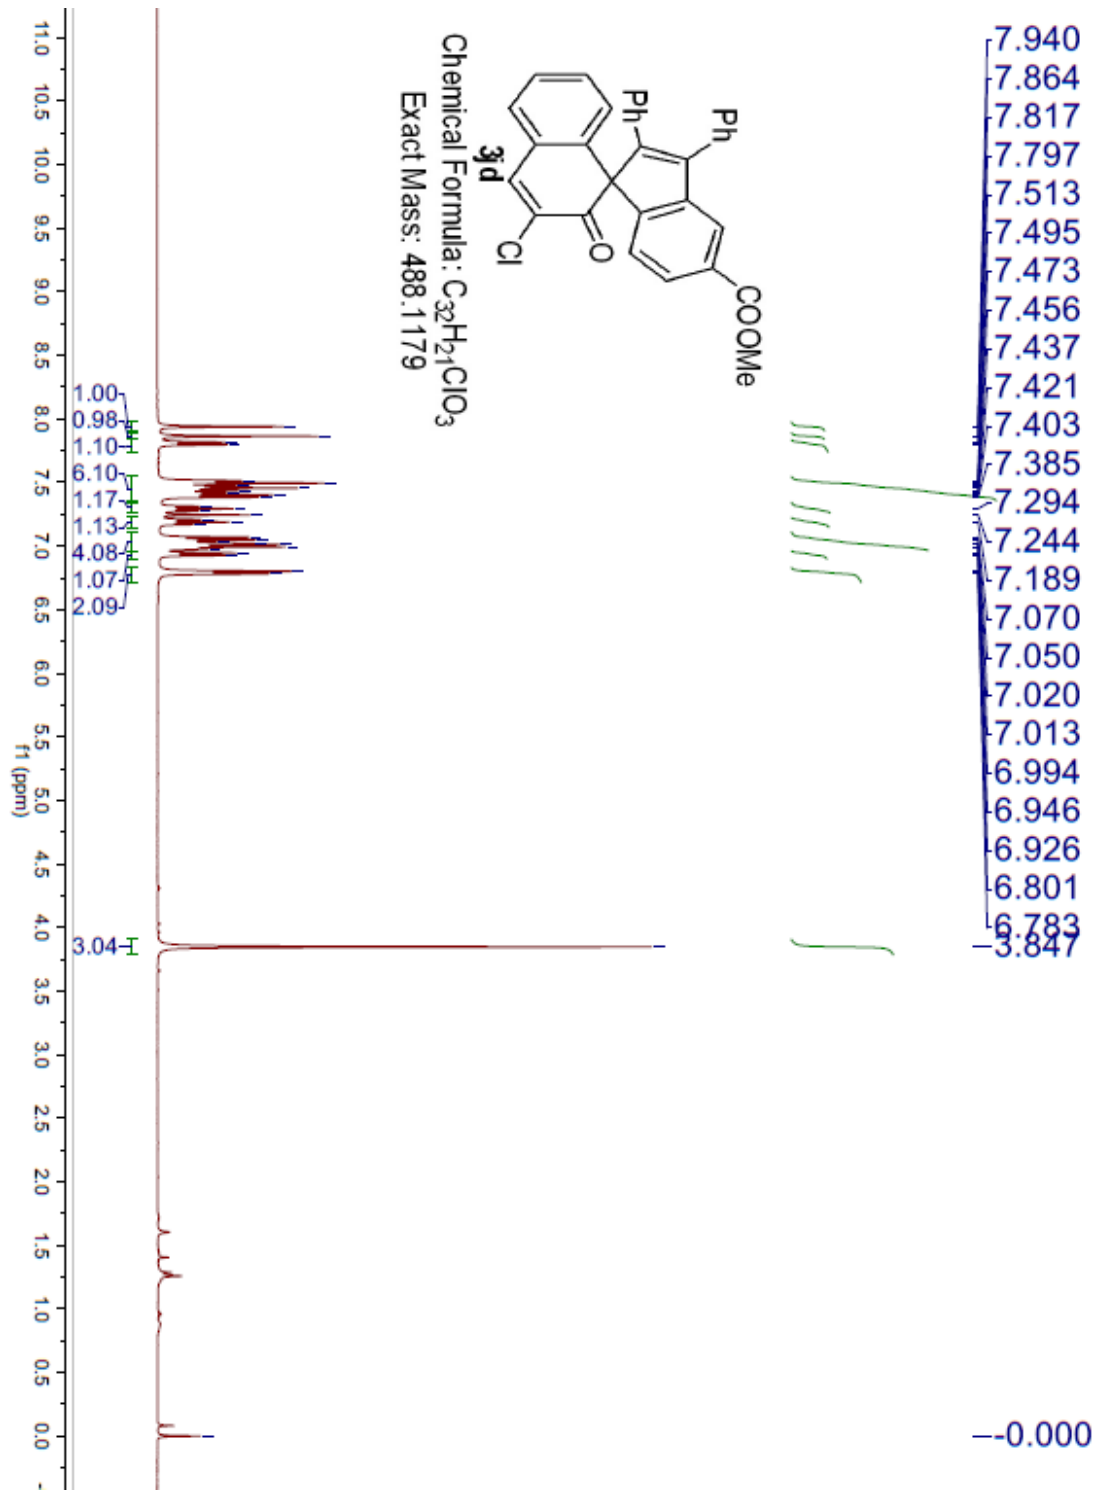

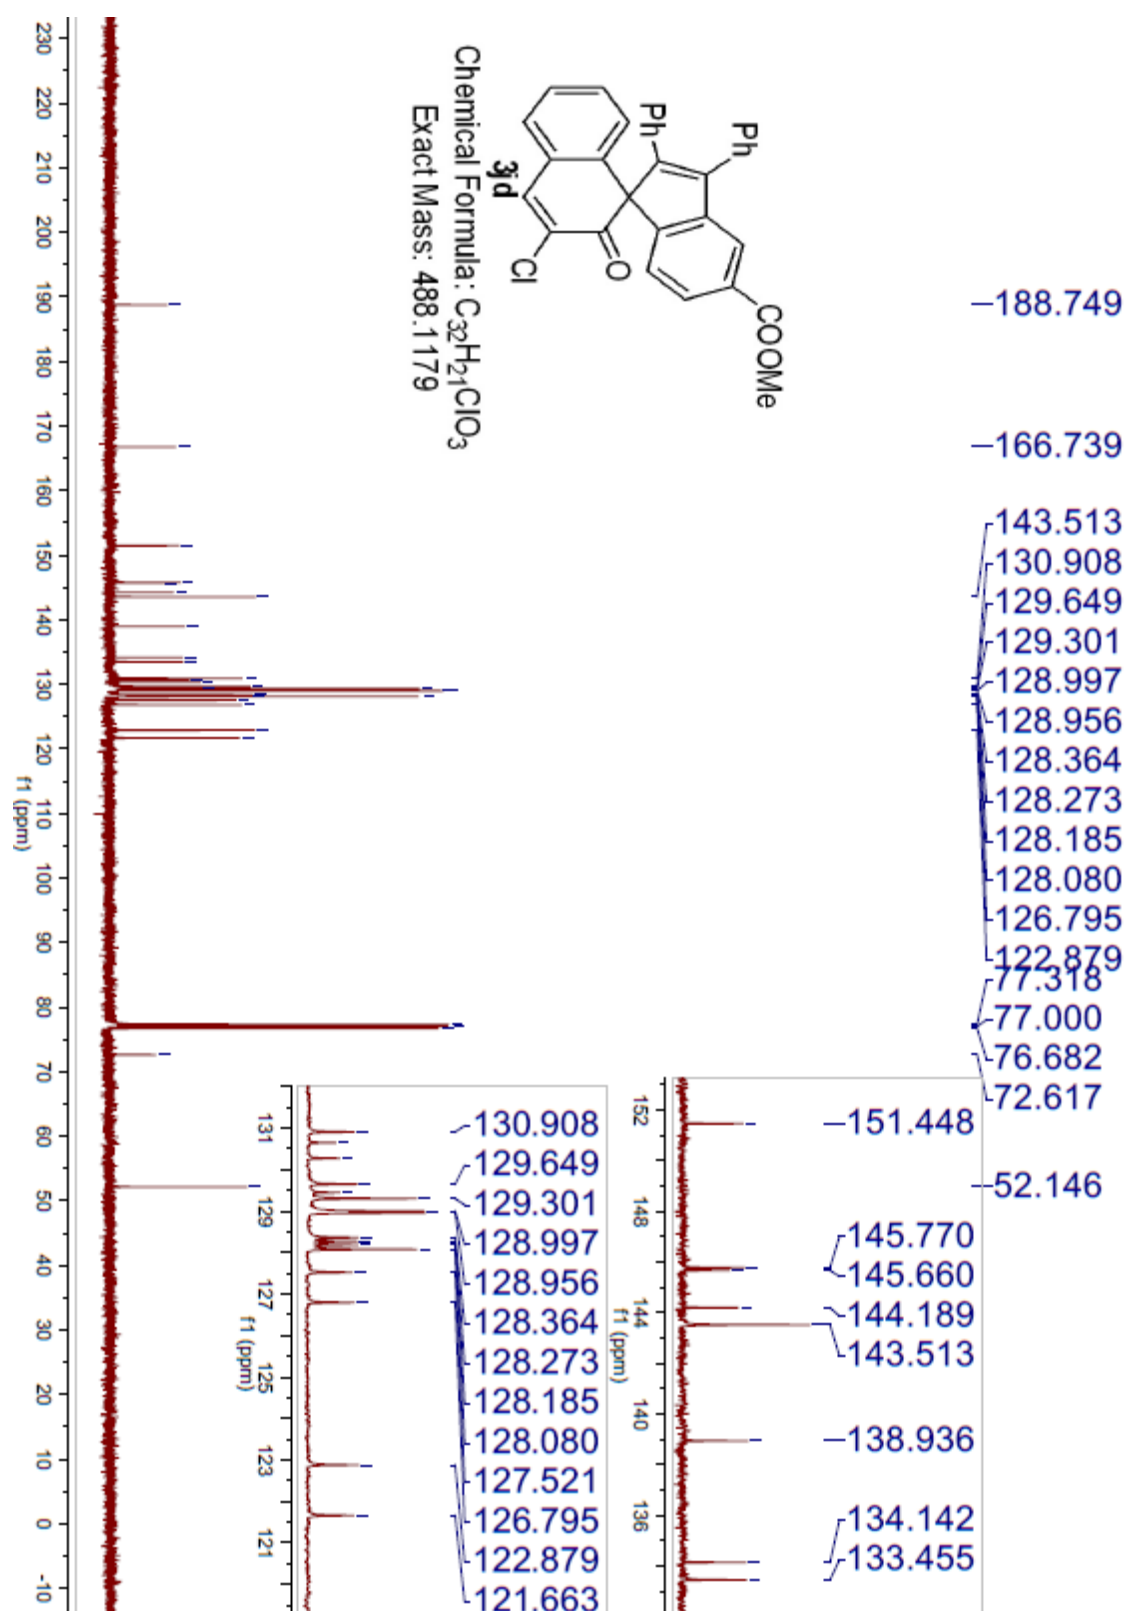

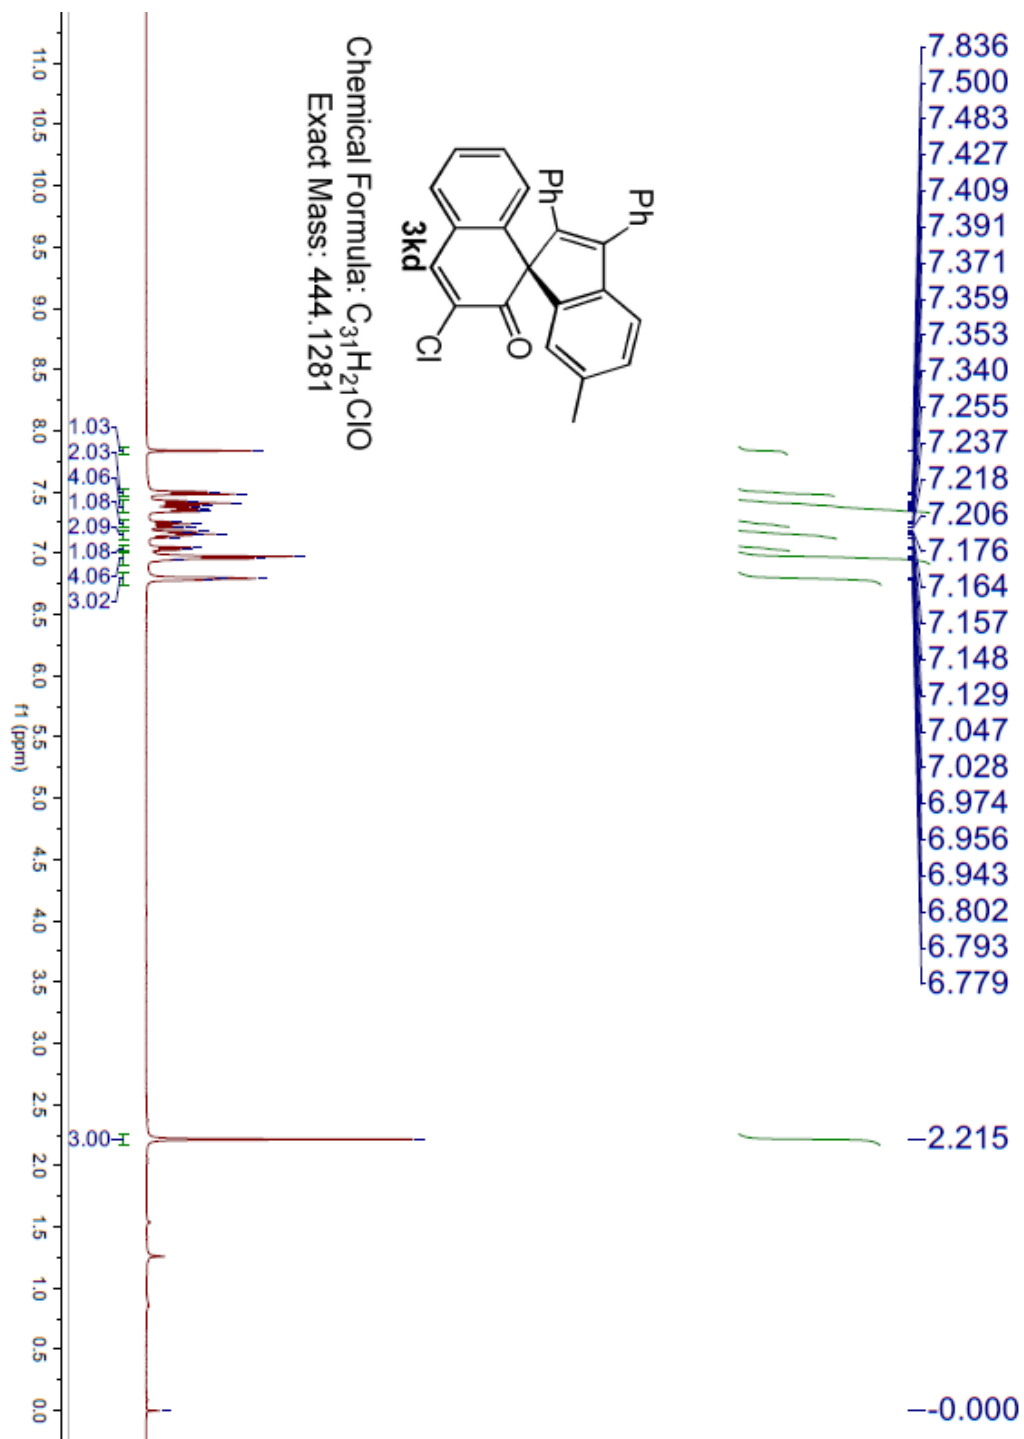

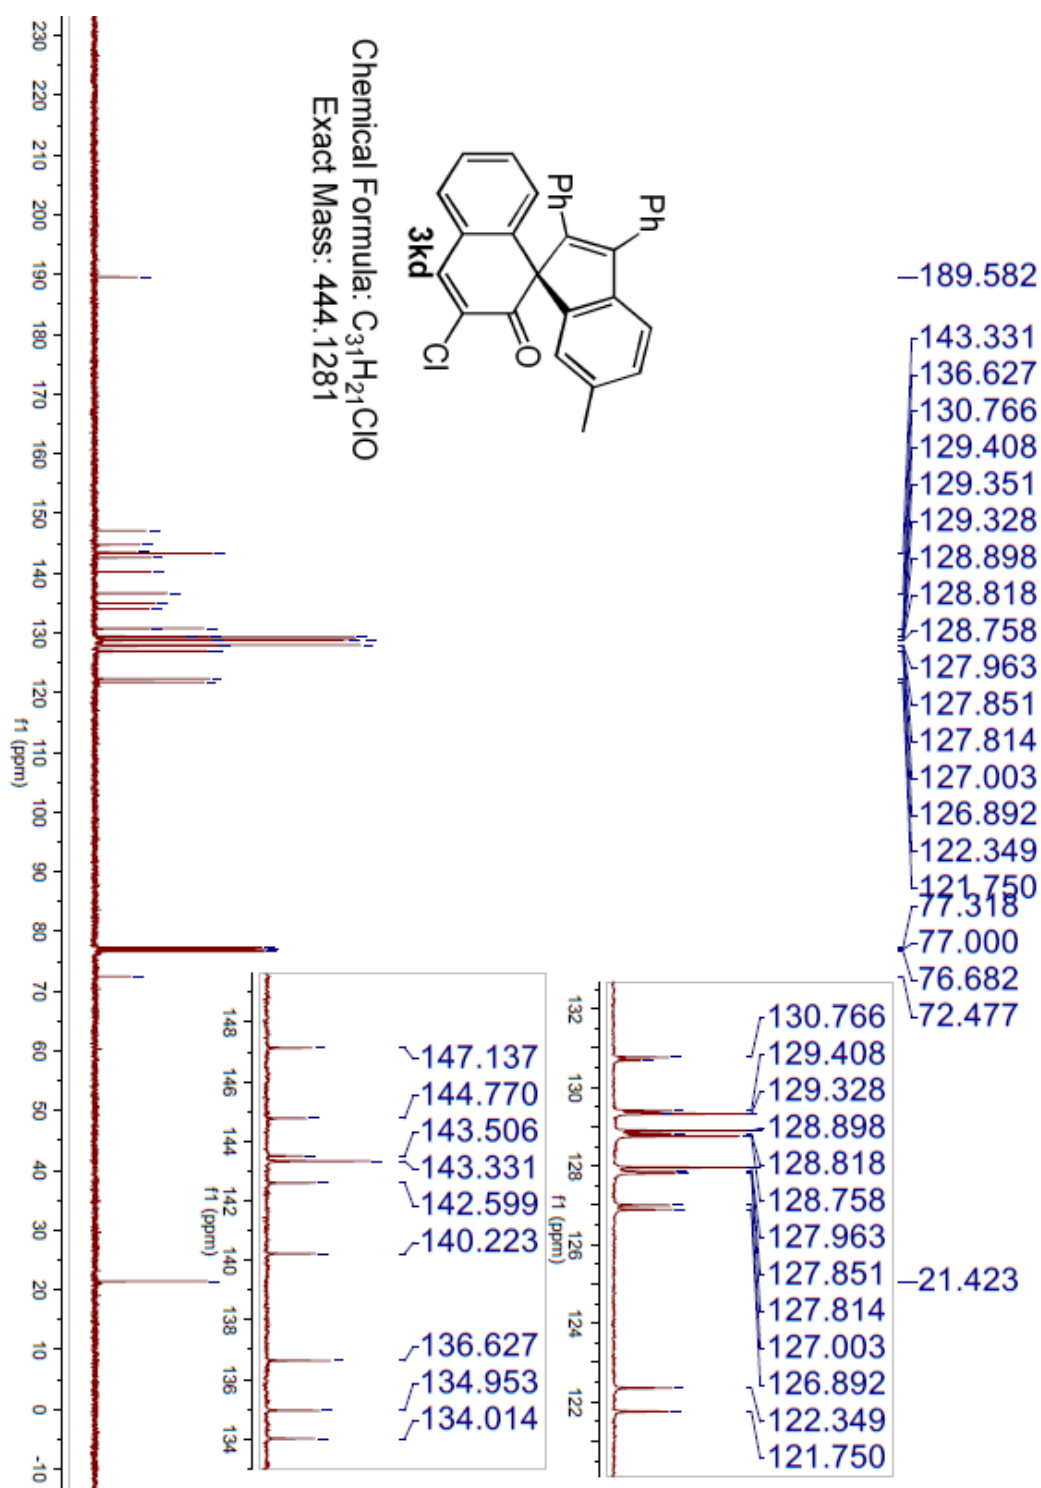

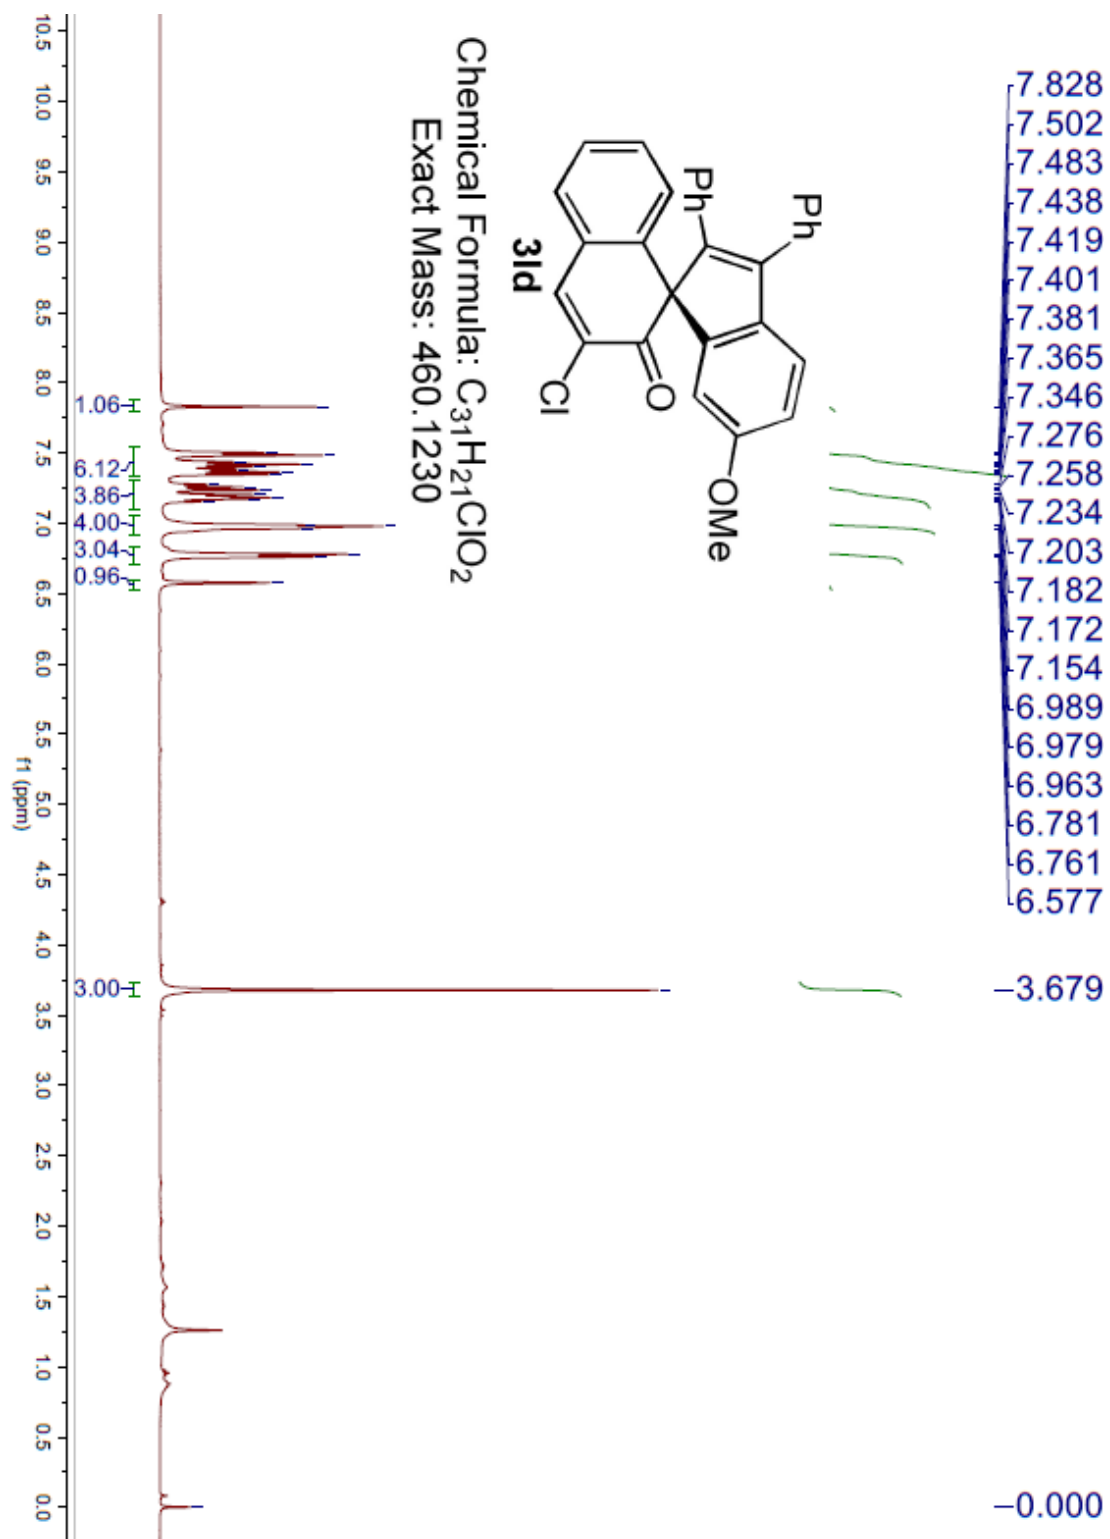

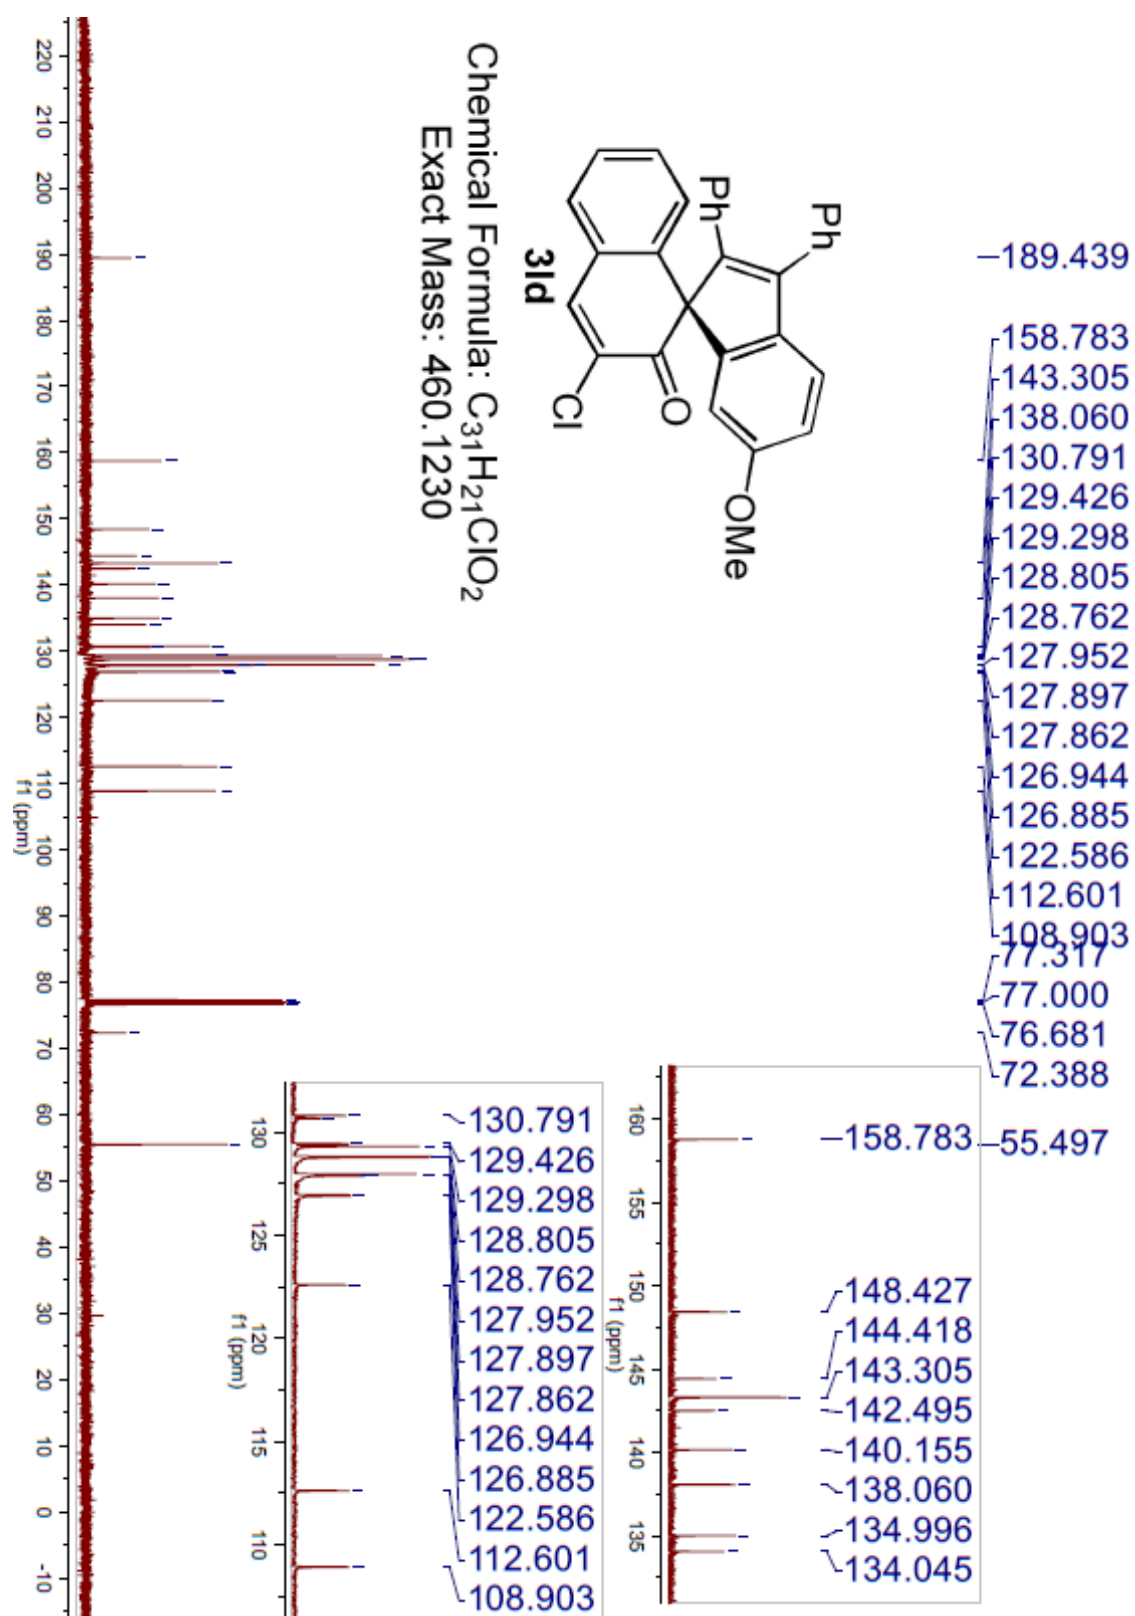

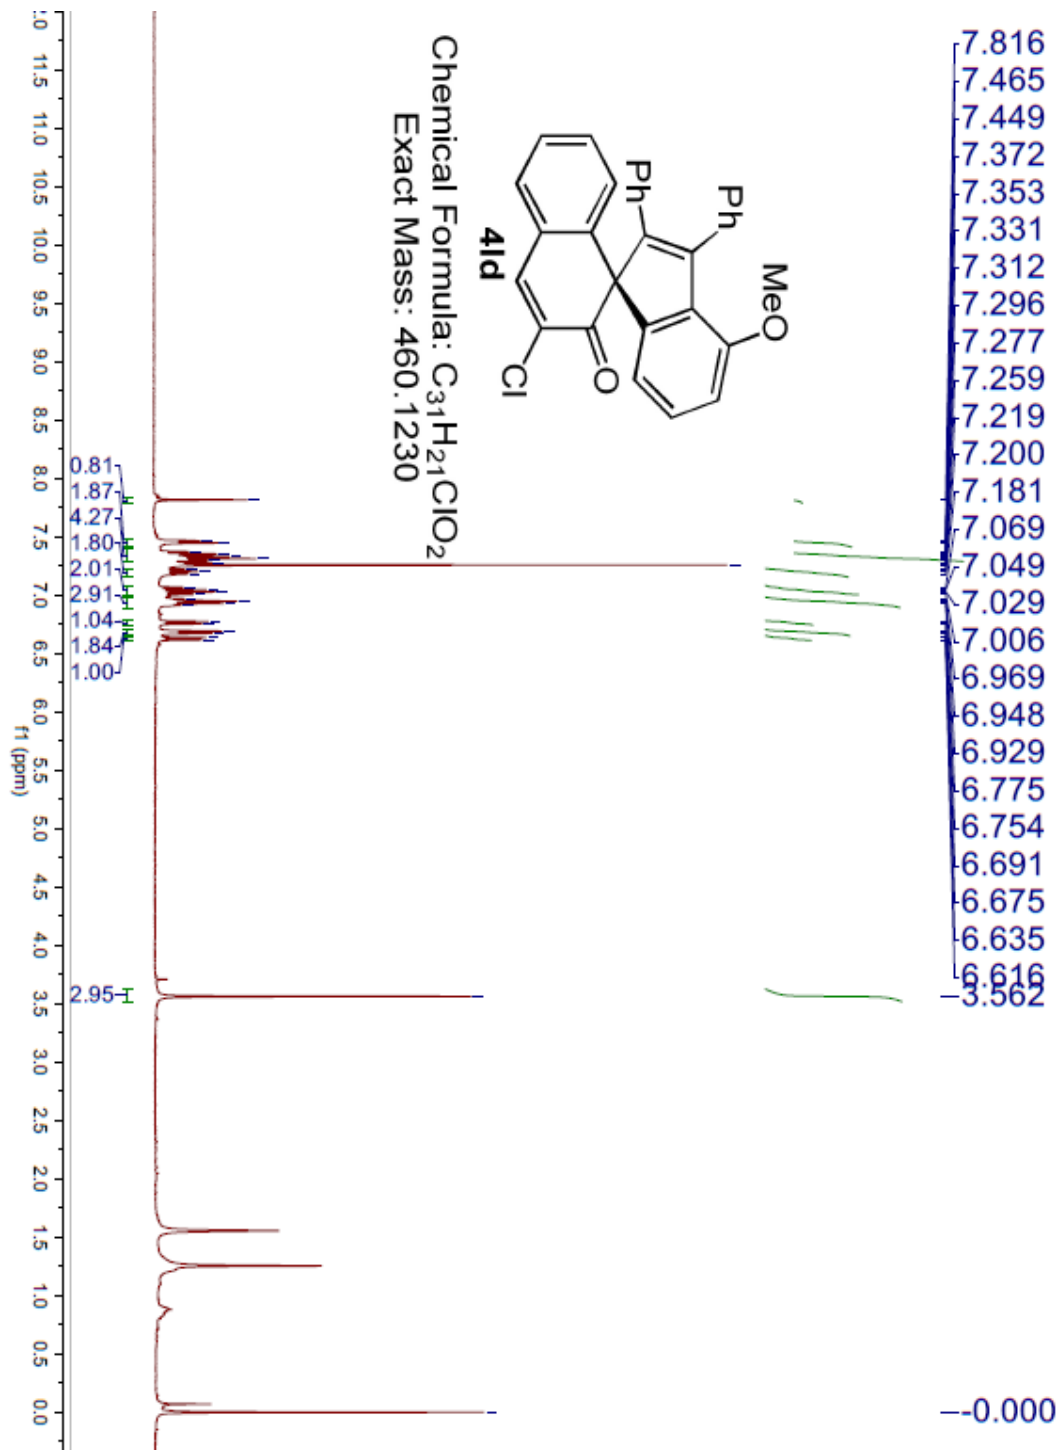

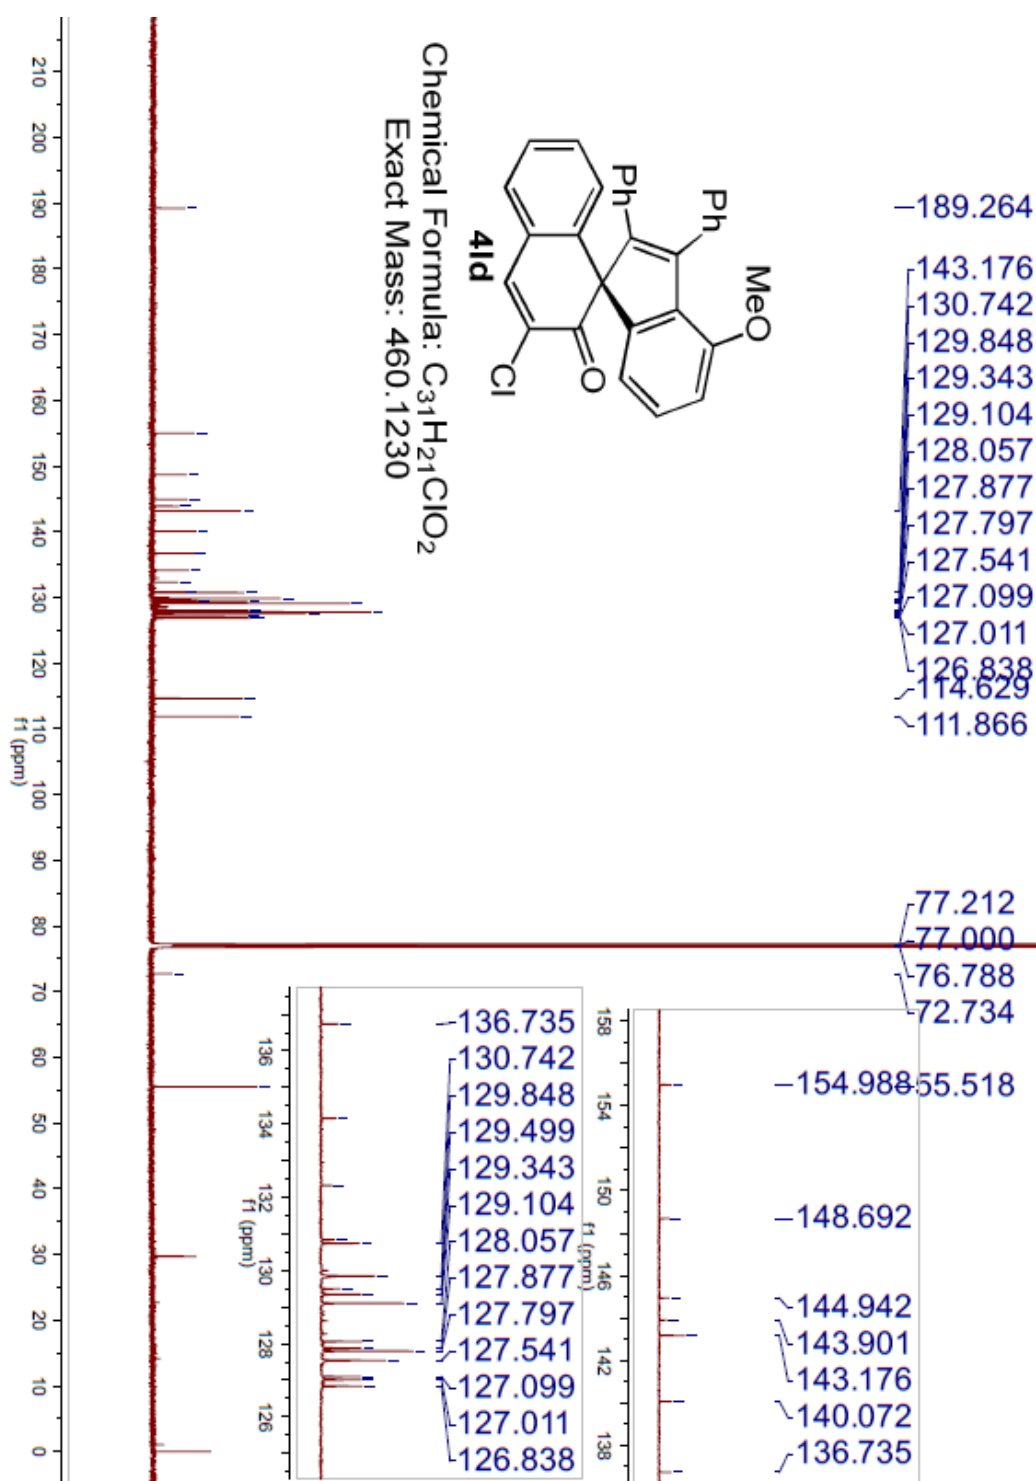



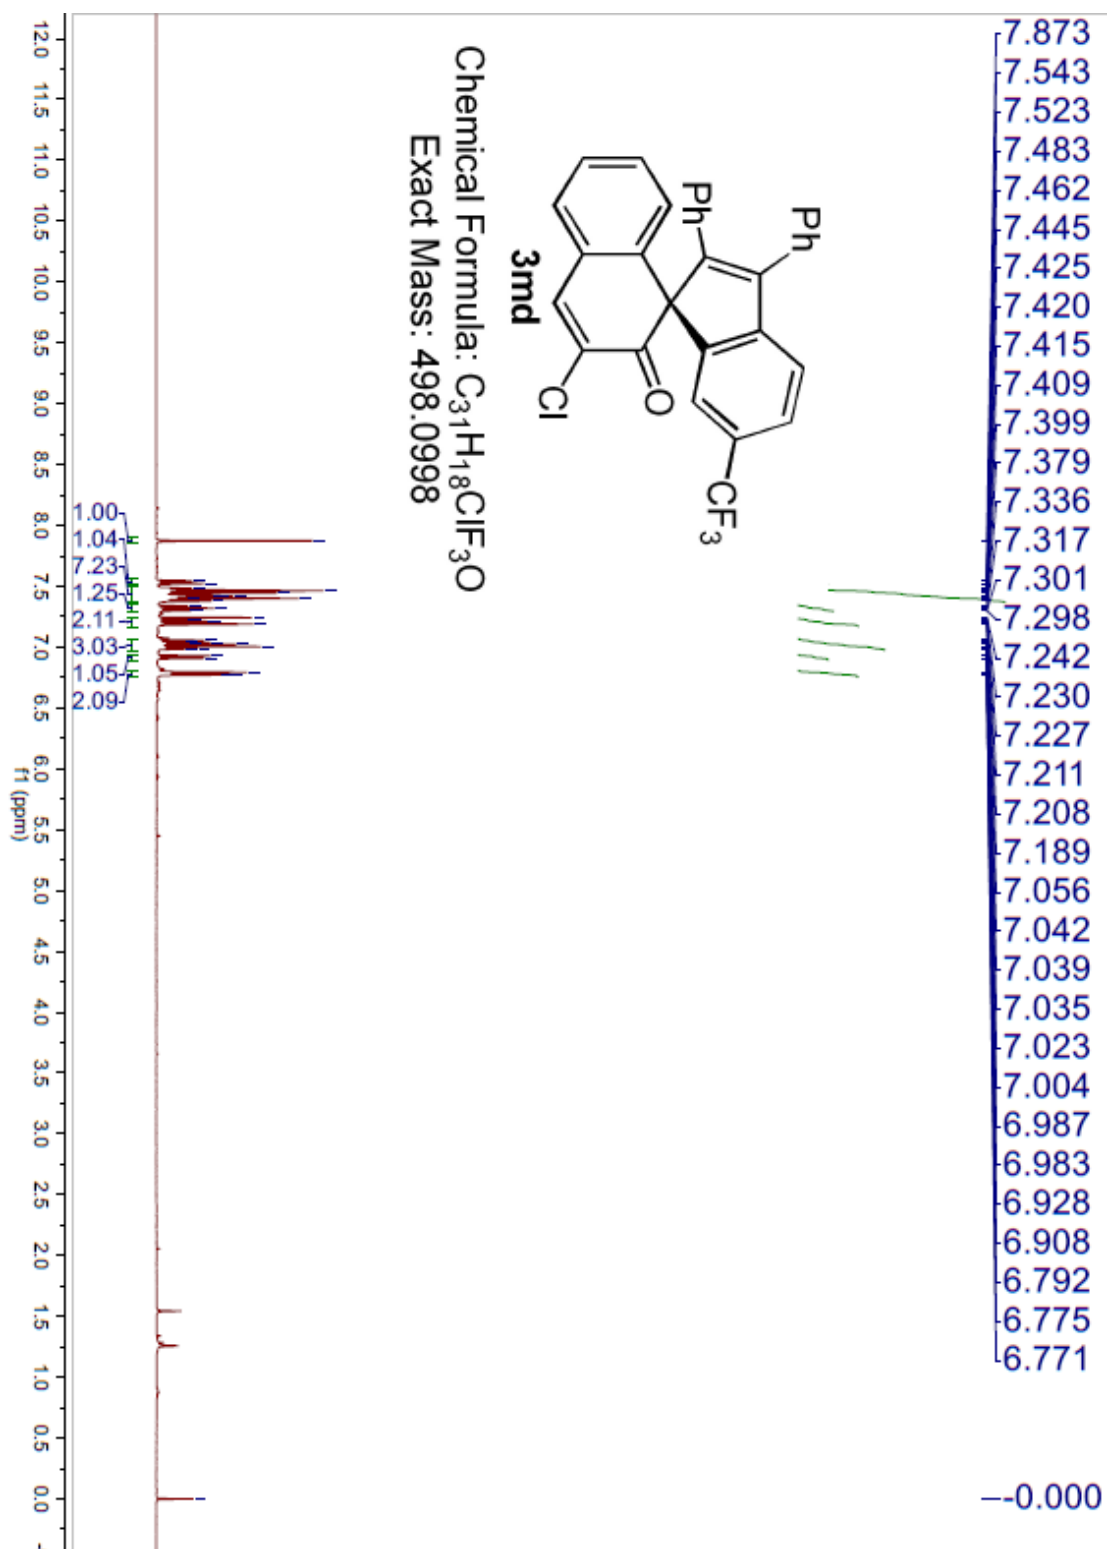

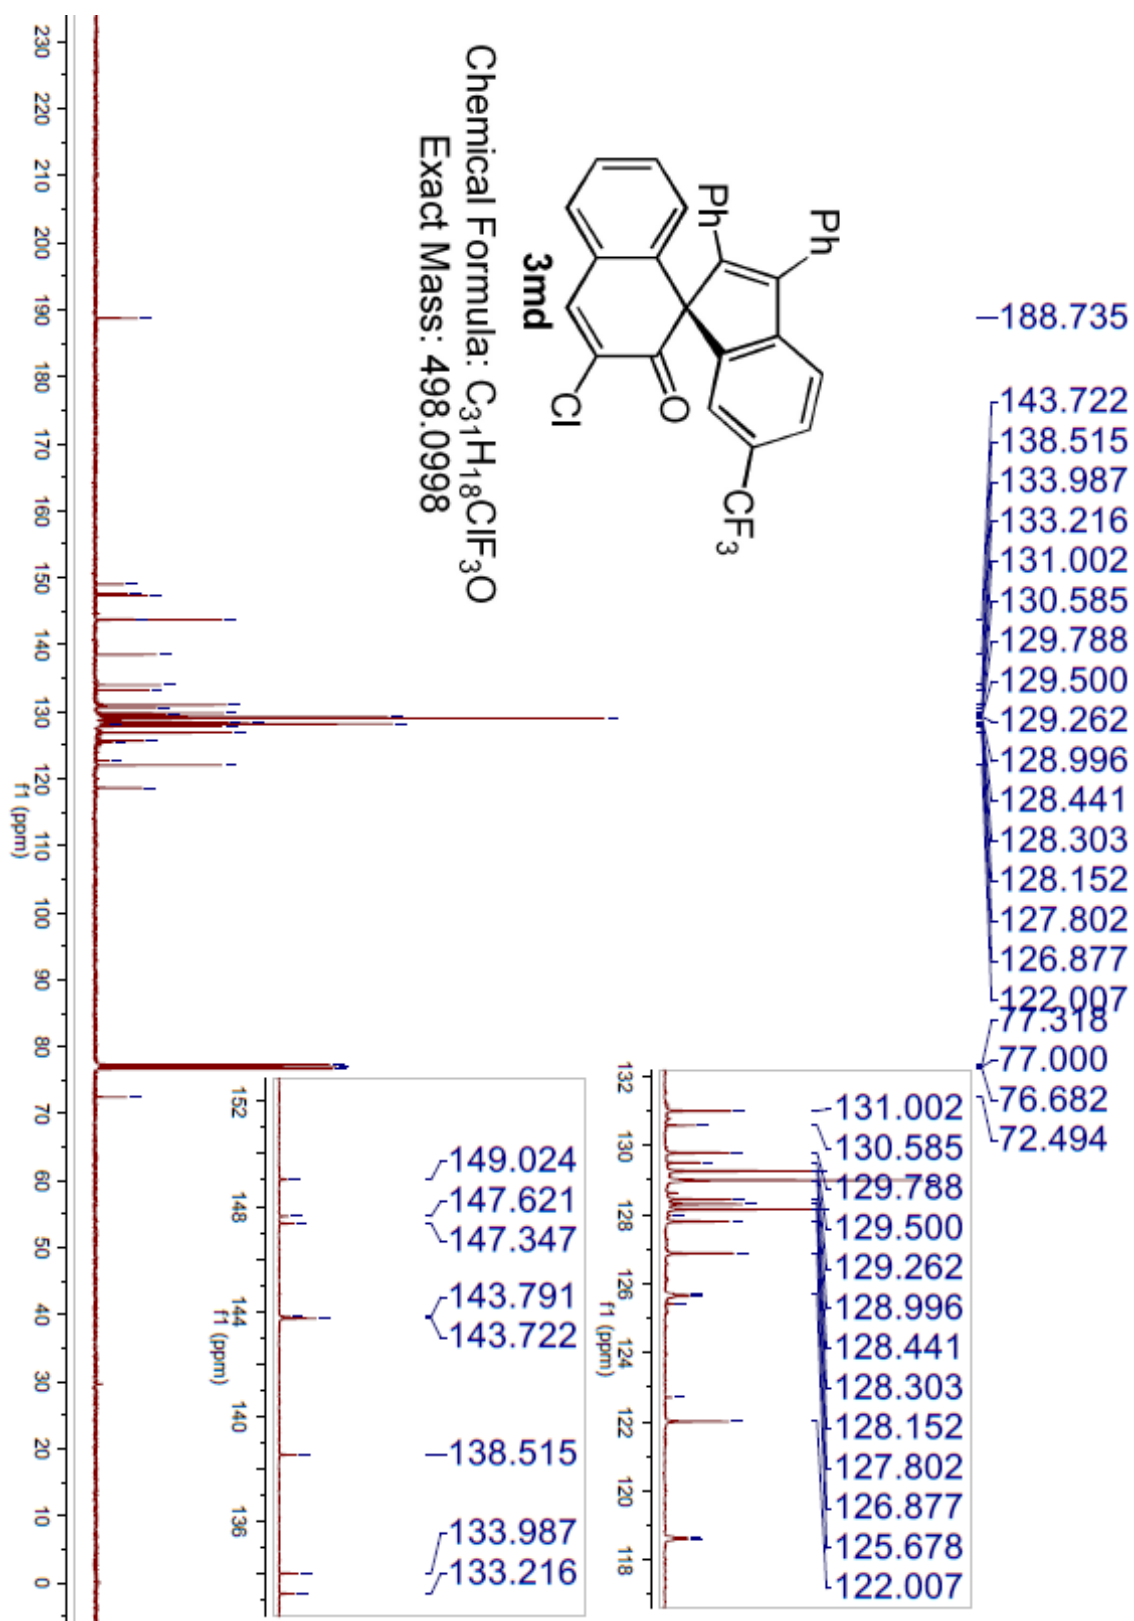

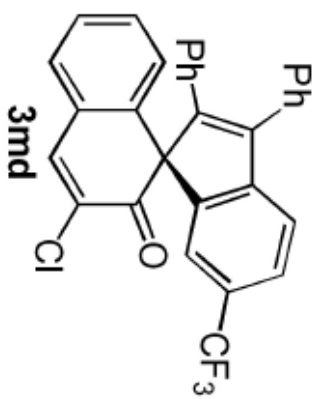

Chemical Formula:  $C_{31}H_{18}ClF_3O$   
 Exact Mass: 498.0998

—61.628

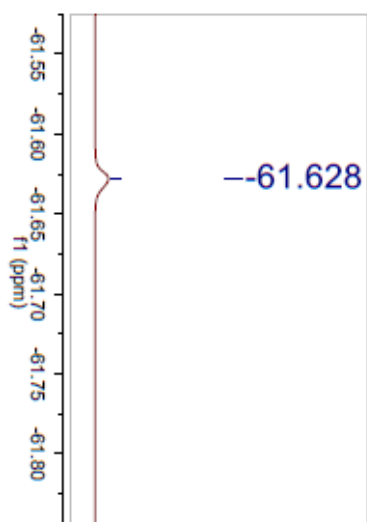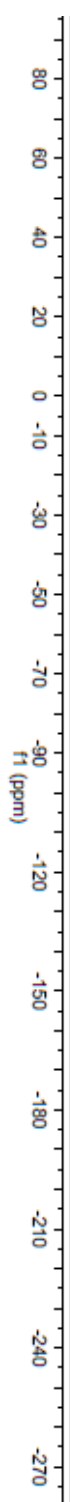

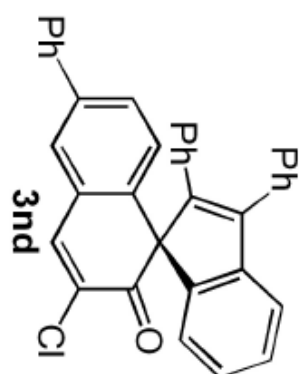

Chemical Formula:  $C_{36}H_{23}ClO$   
 Exact Mass: 506.1437

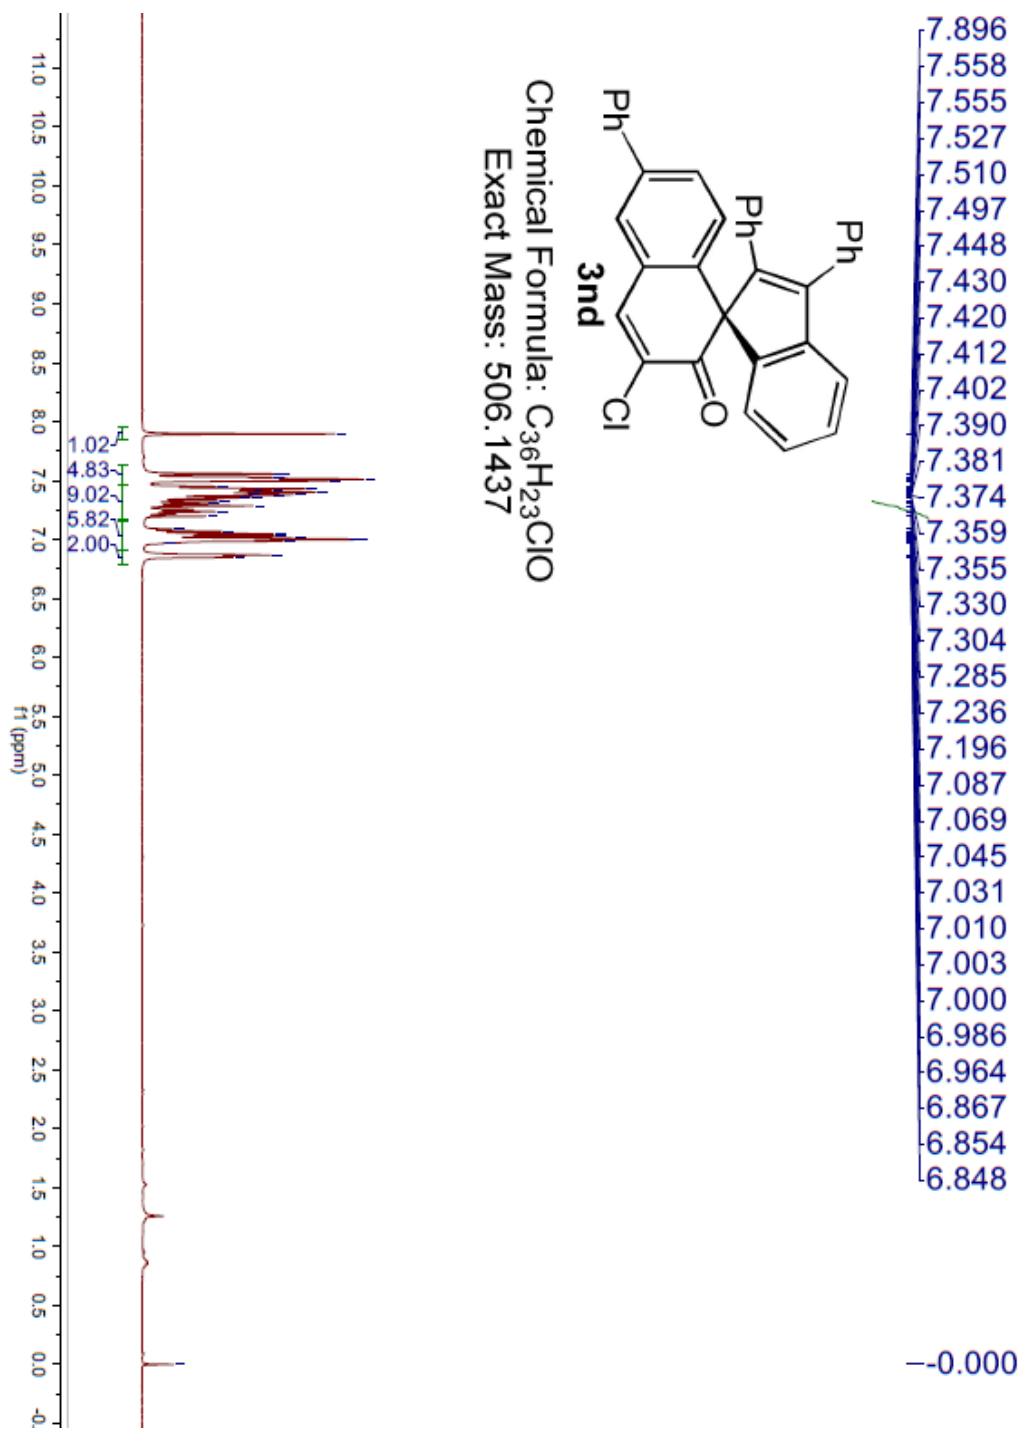

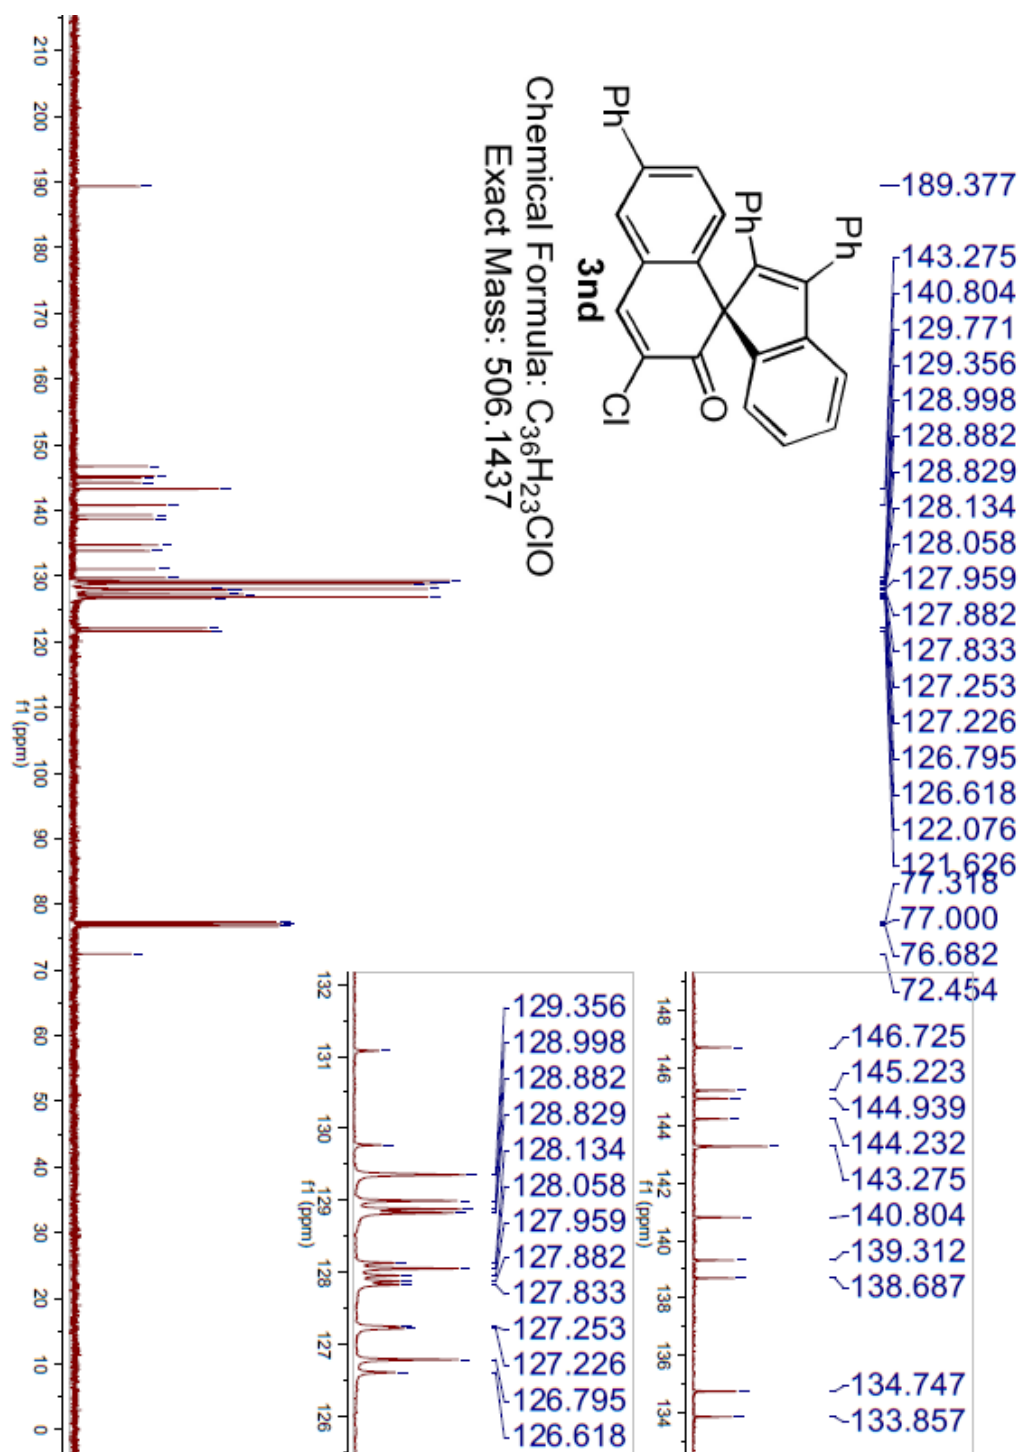

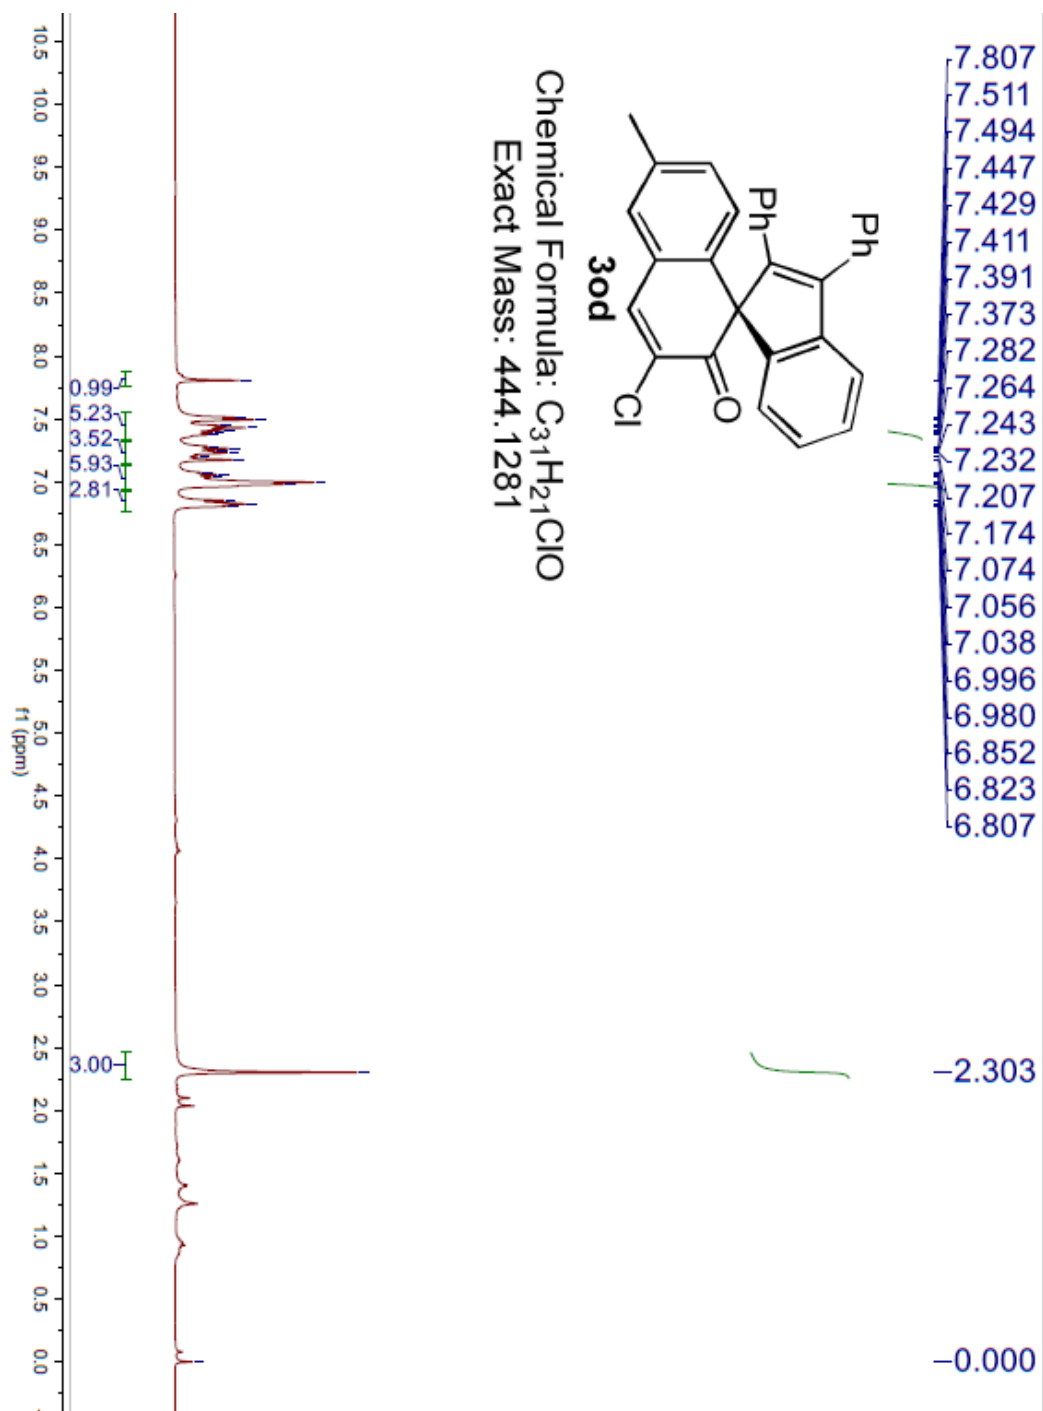

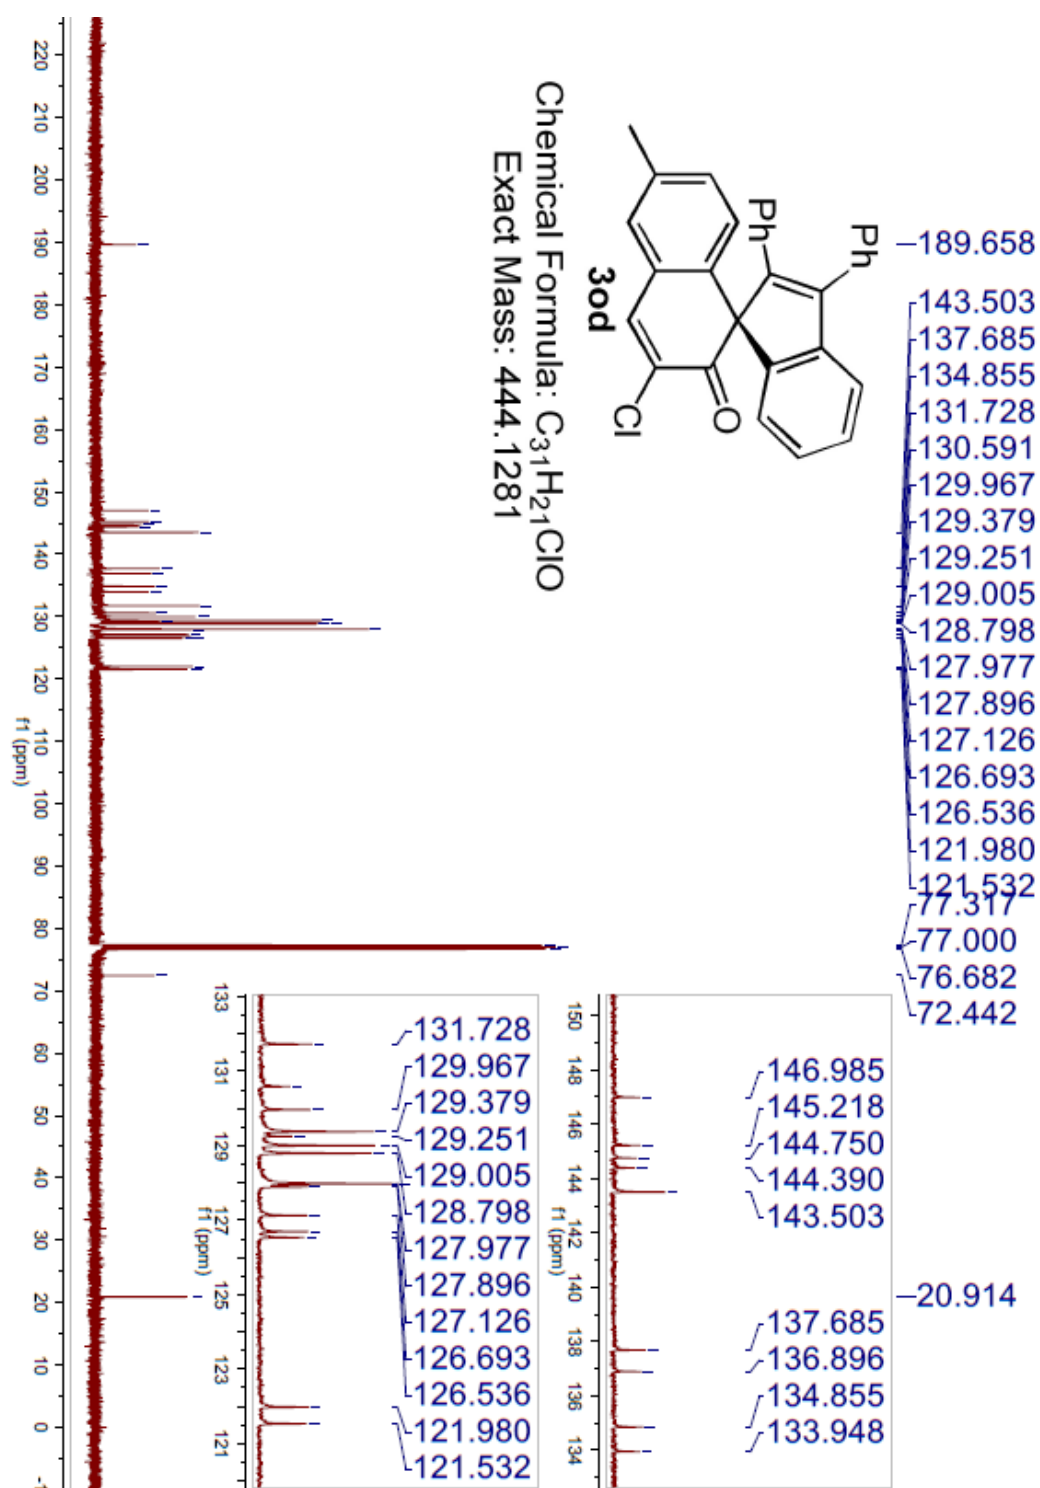

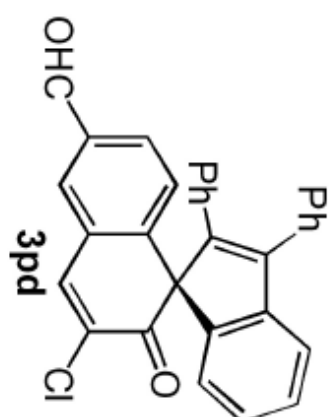

Chemical Formula:  $C_{31}H_{19}ClO_2$   
 Exact Mass: 458.1074

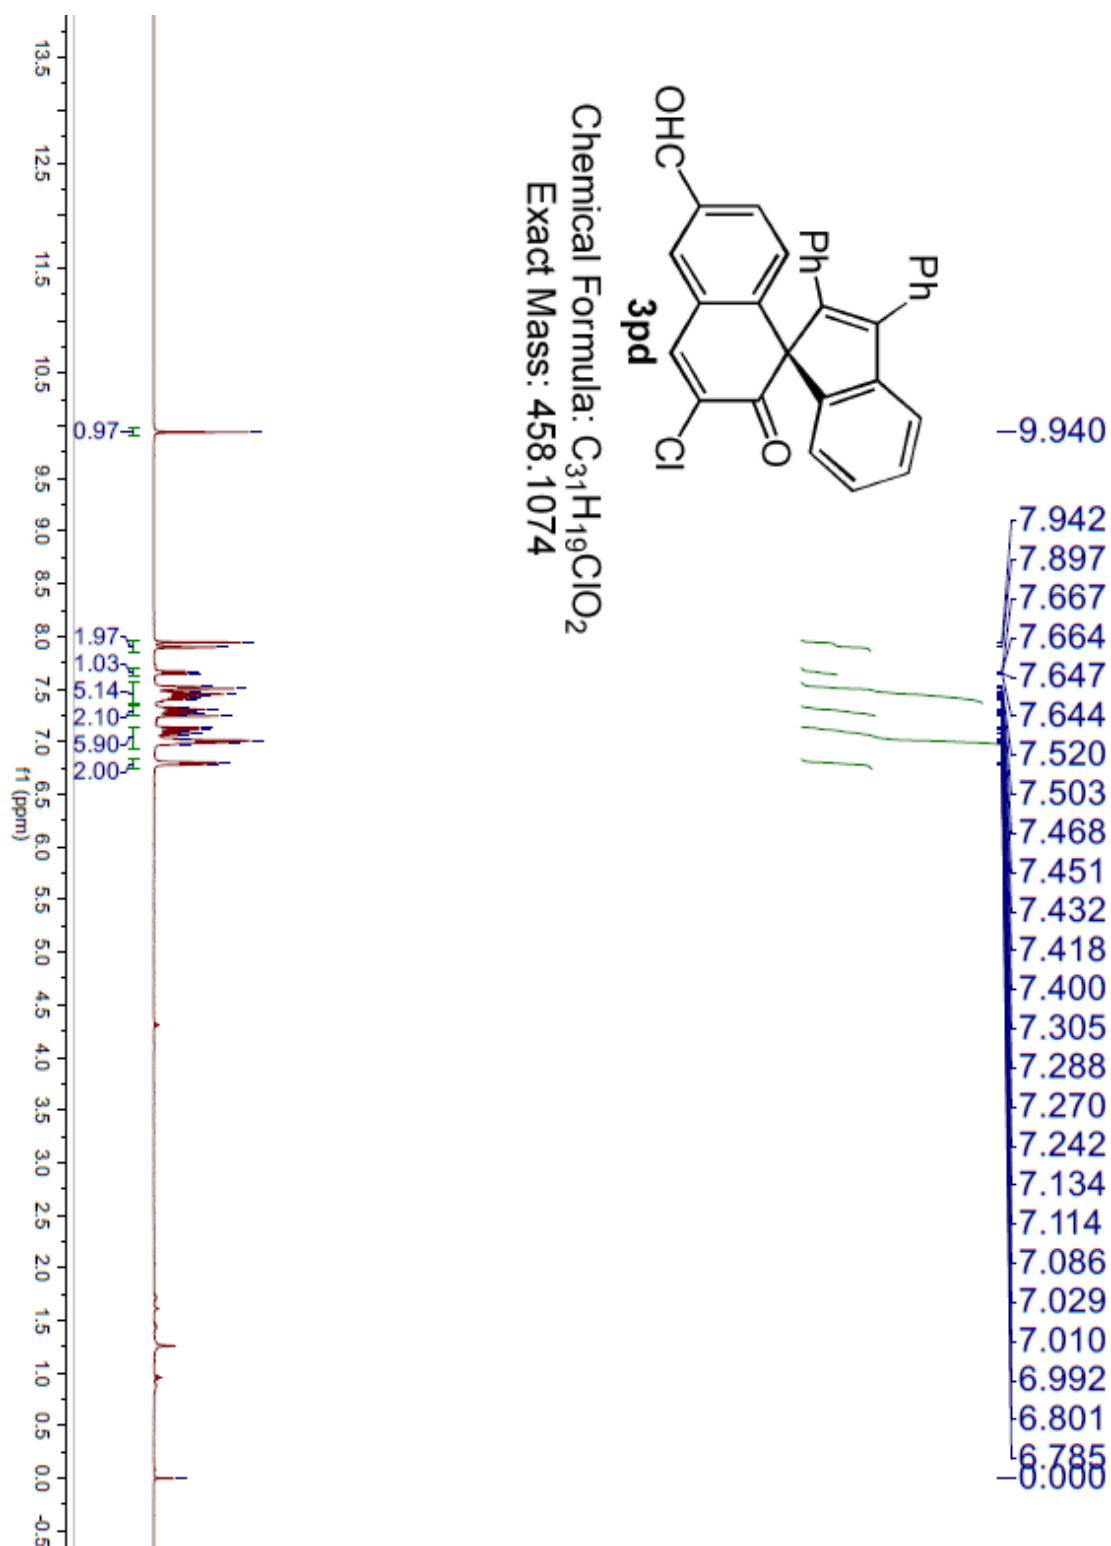



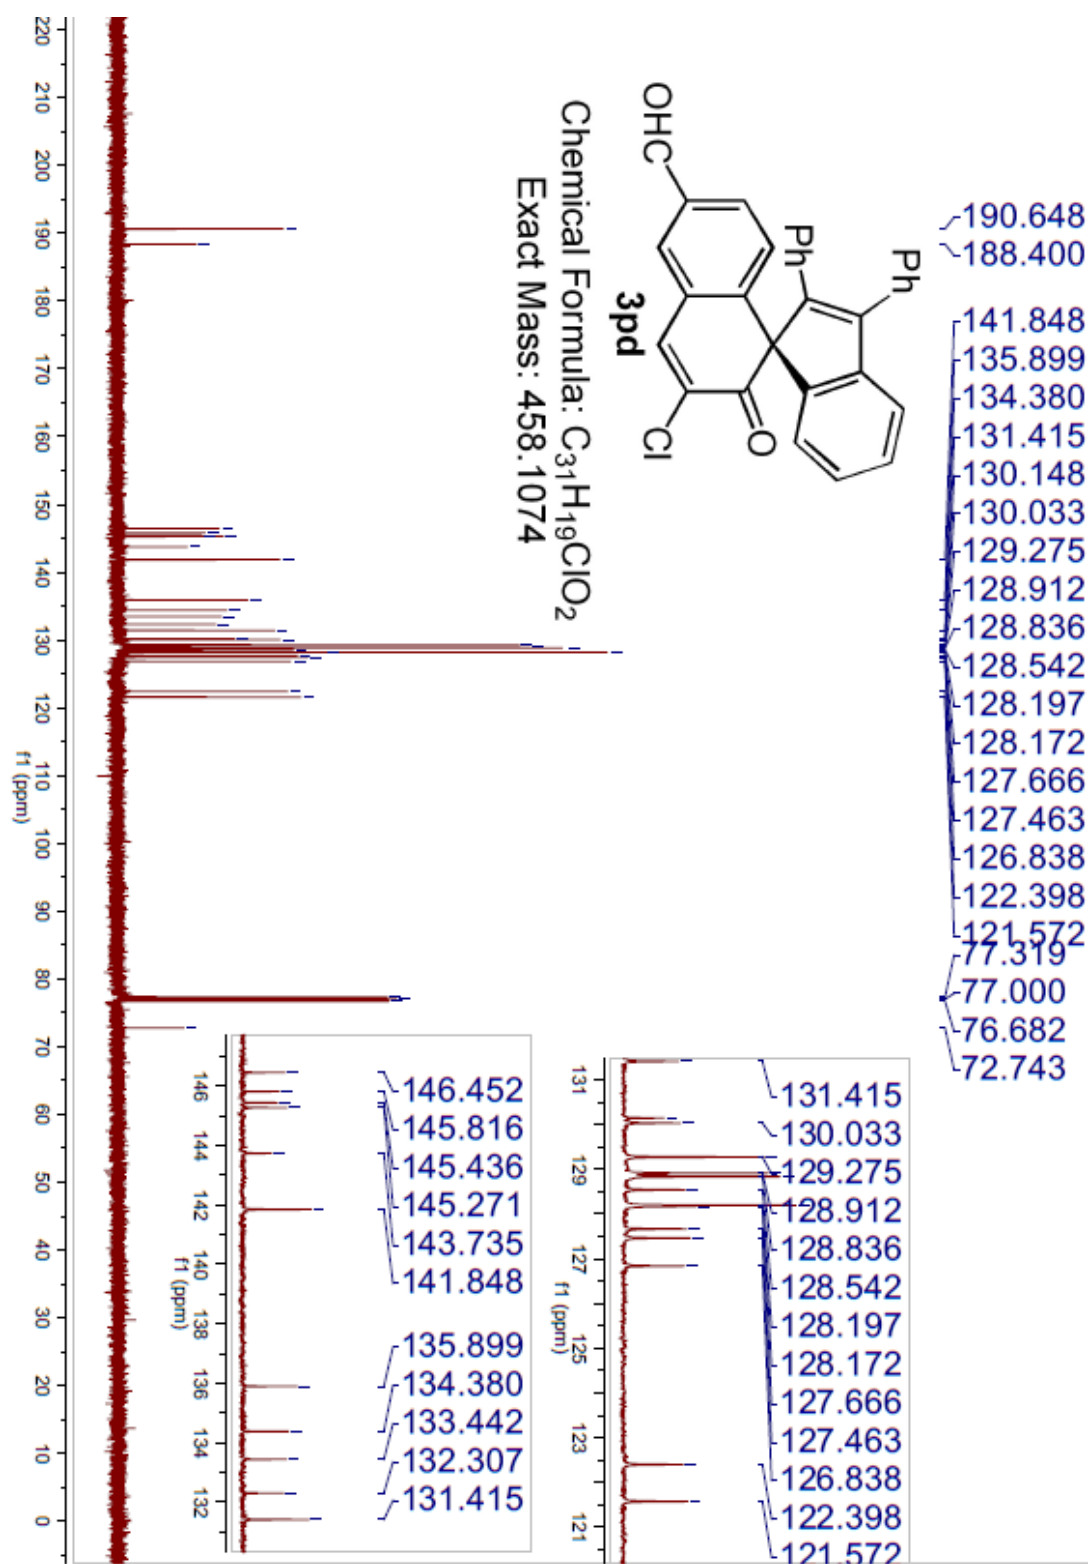

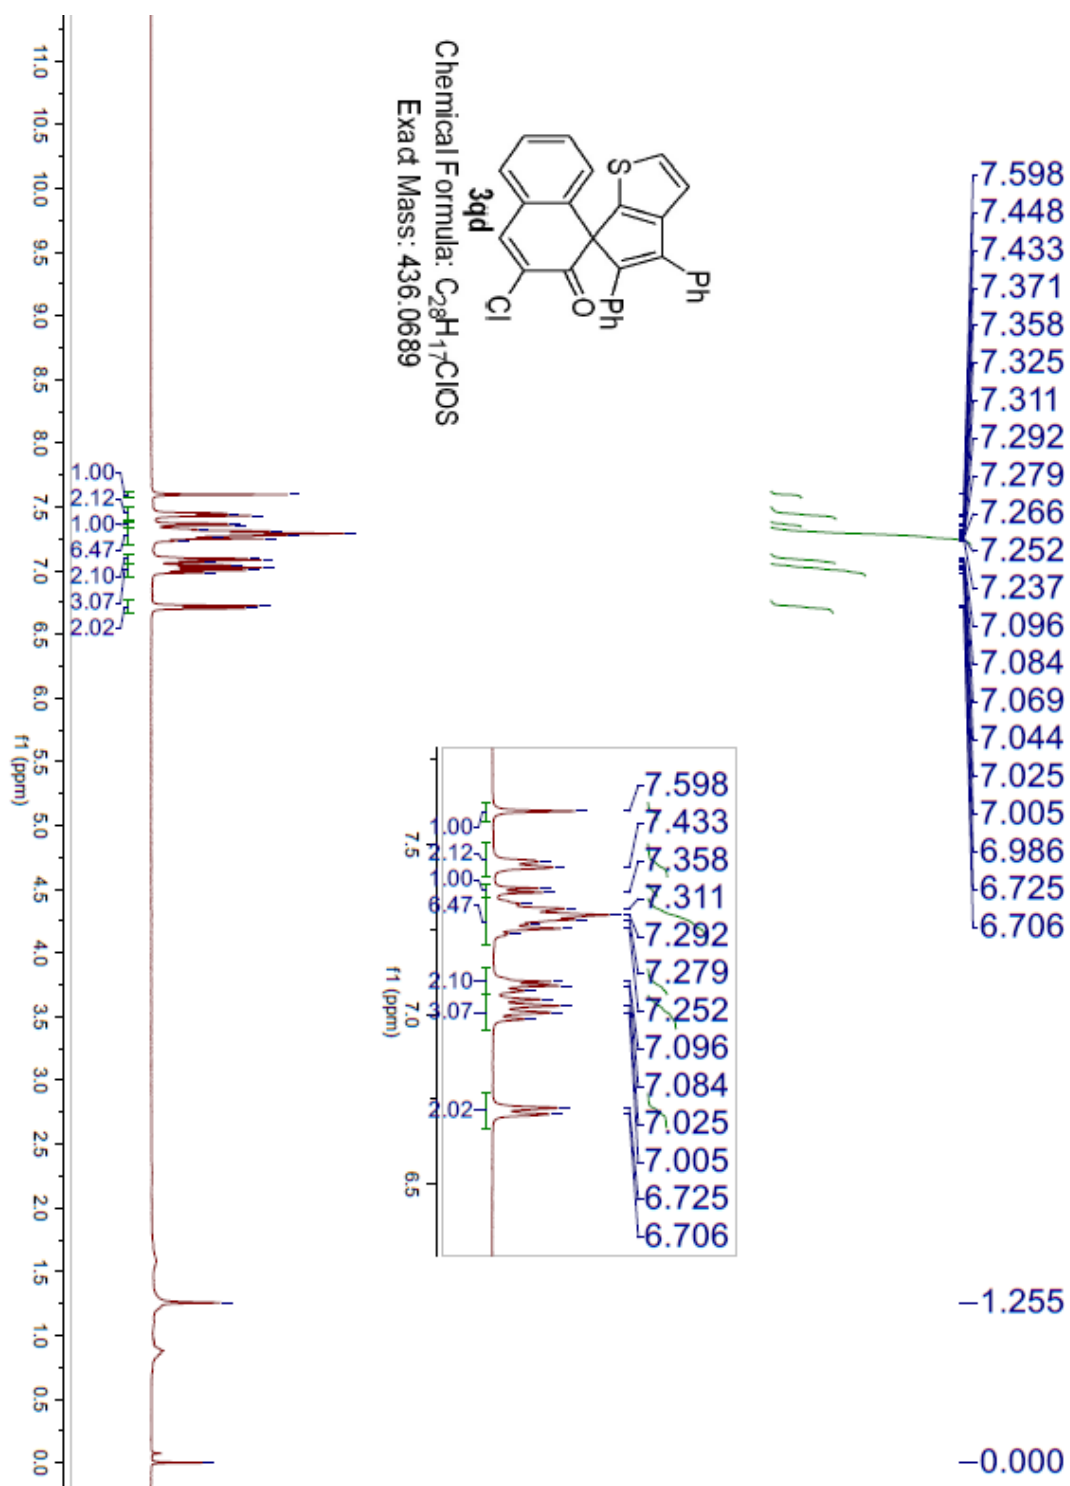

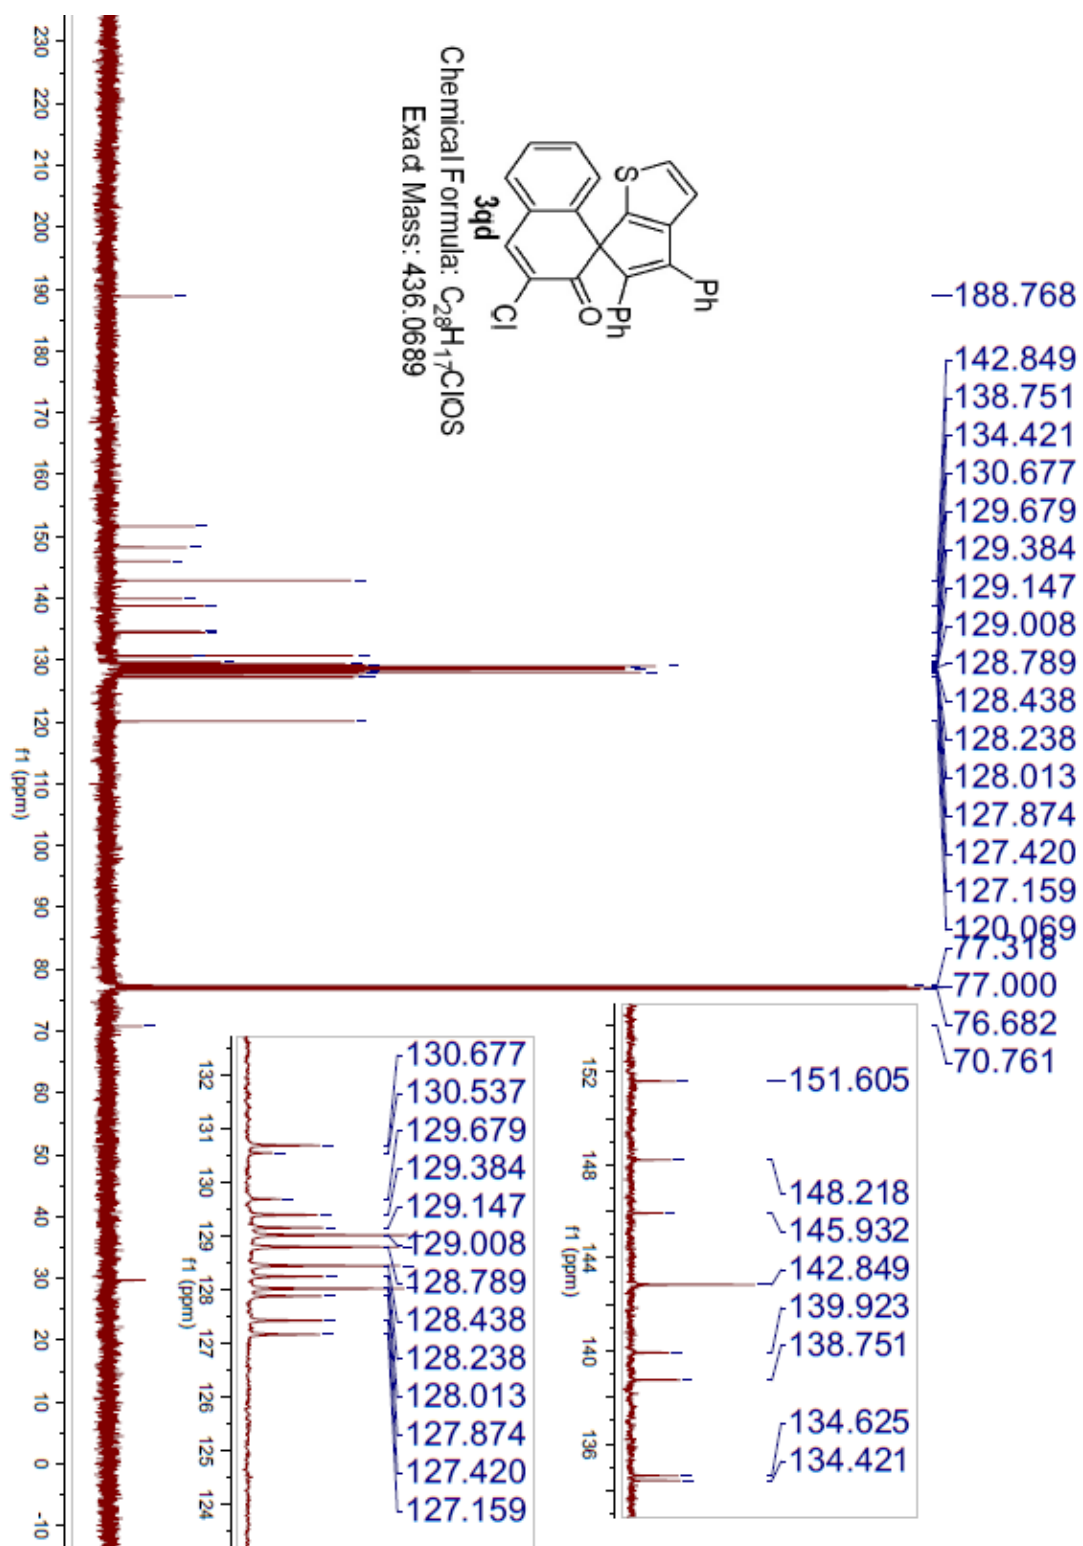

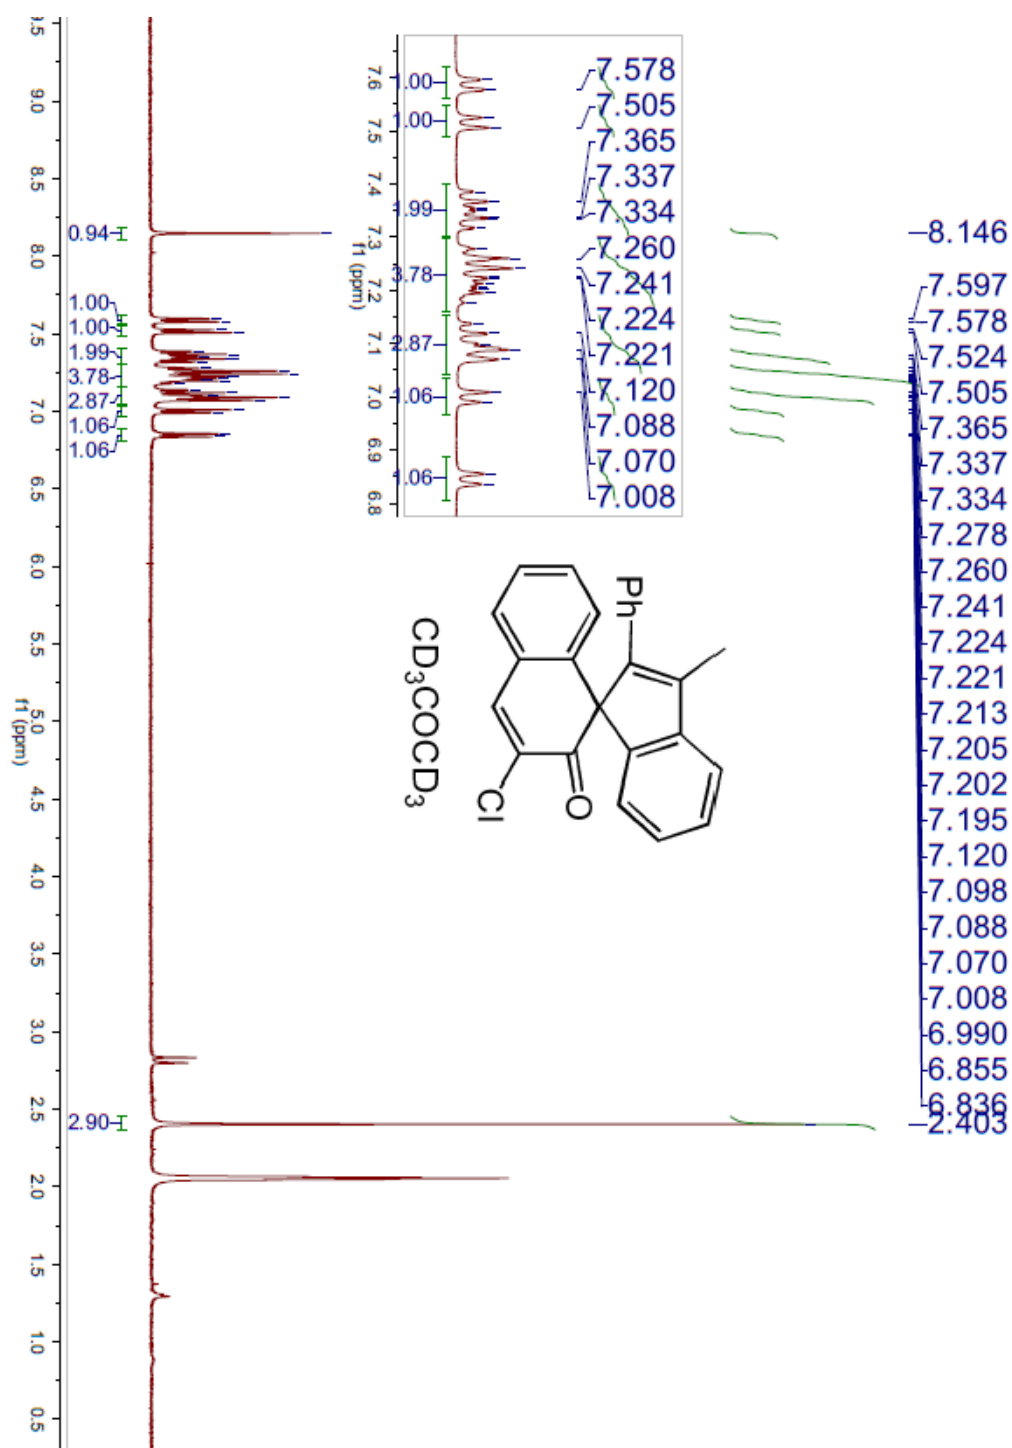

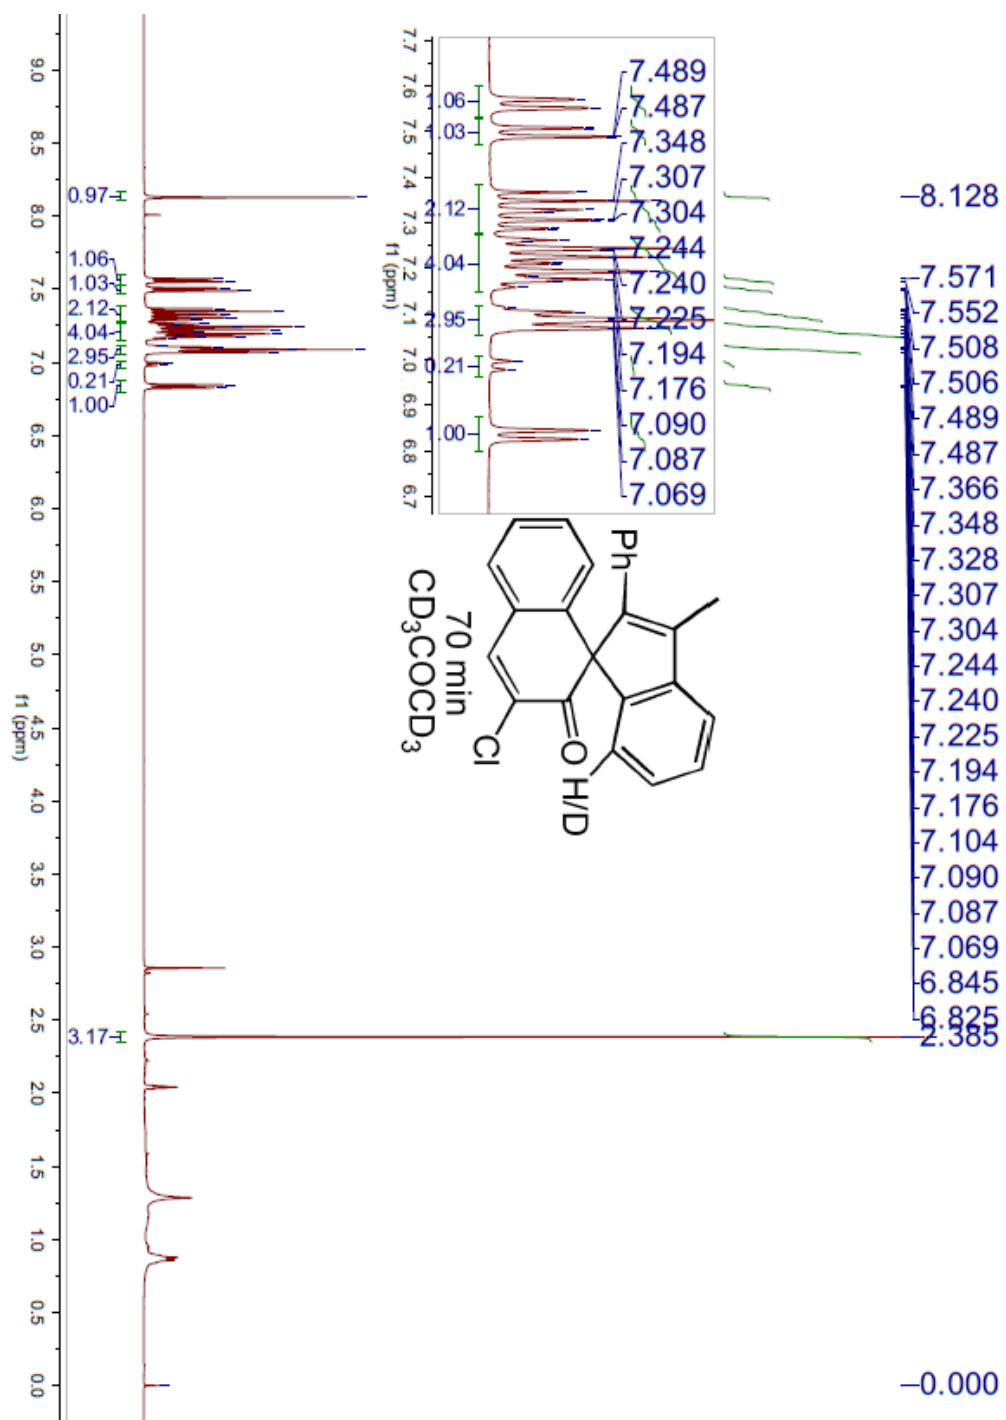

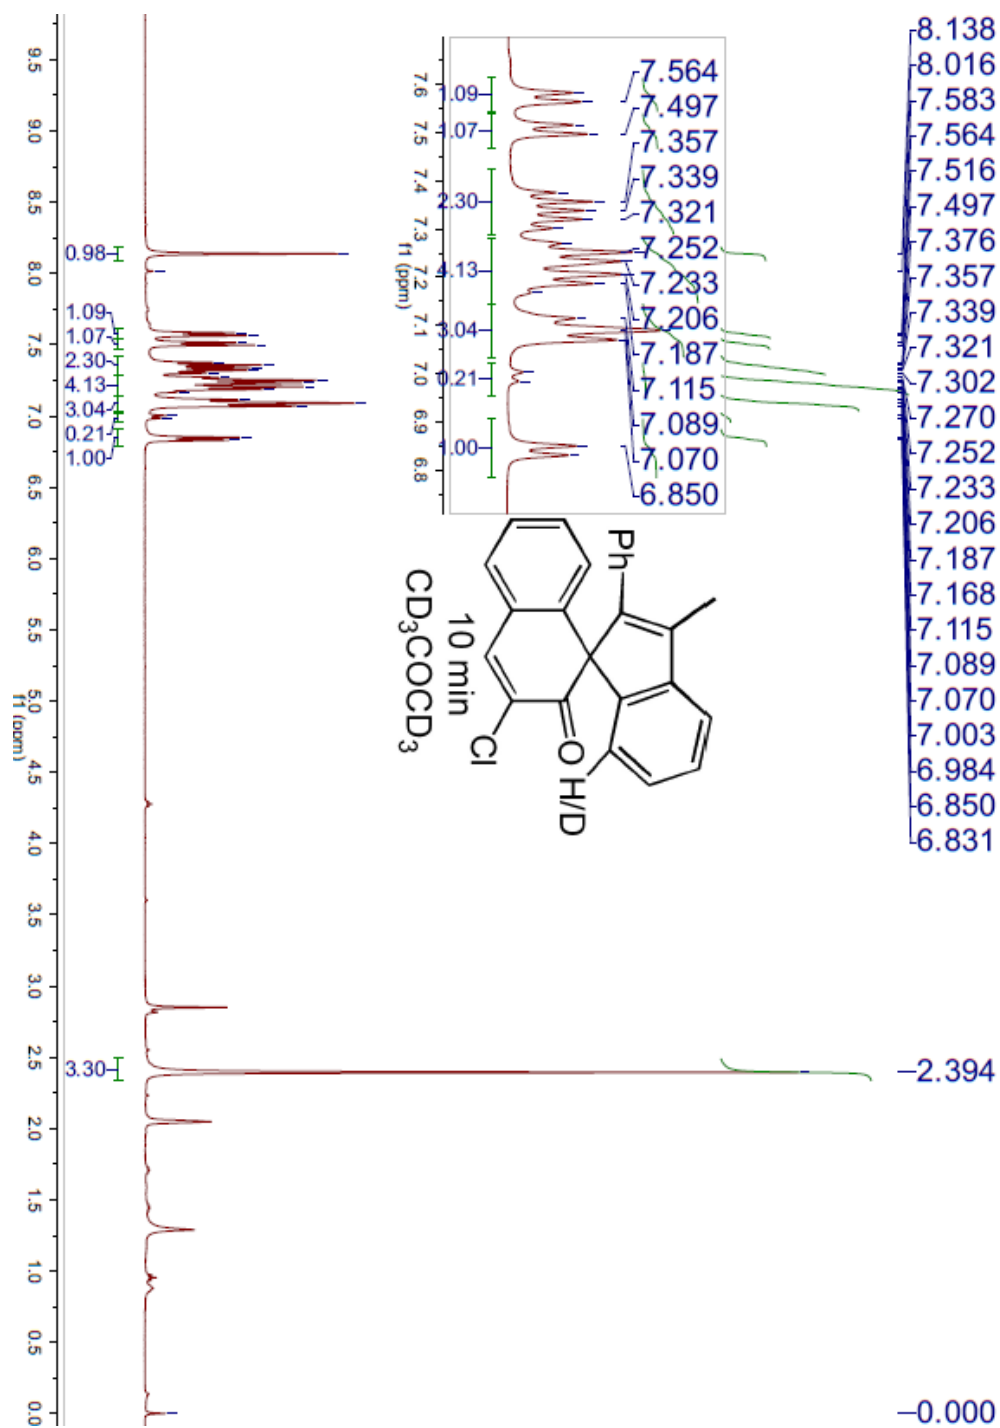

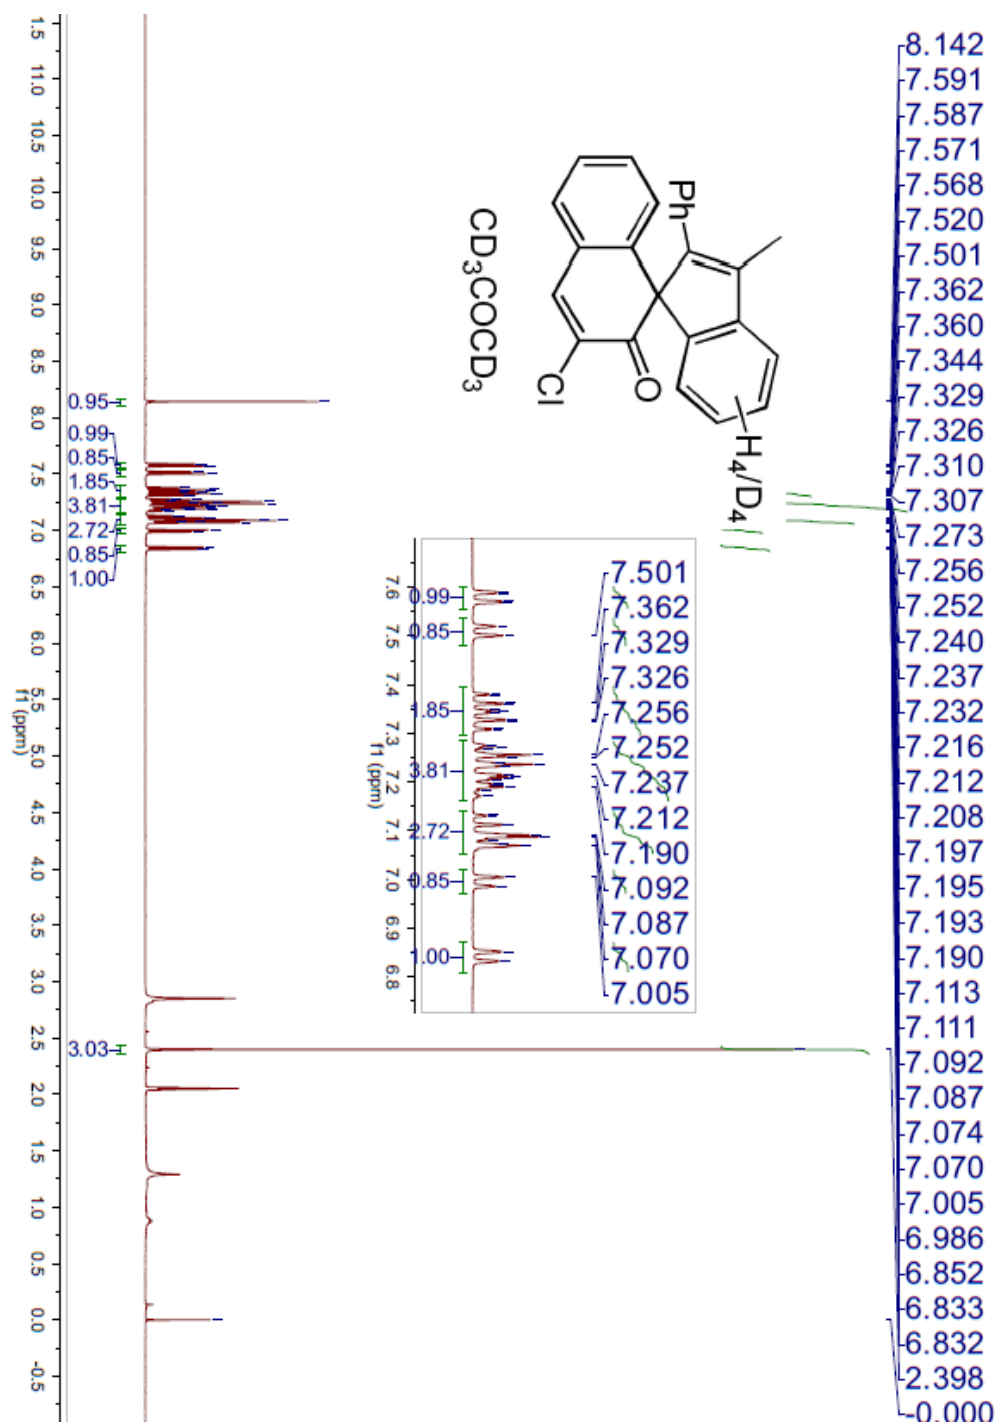

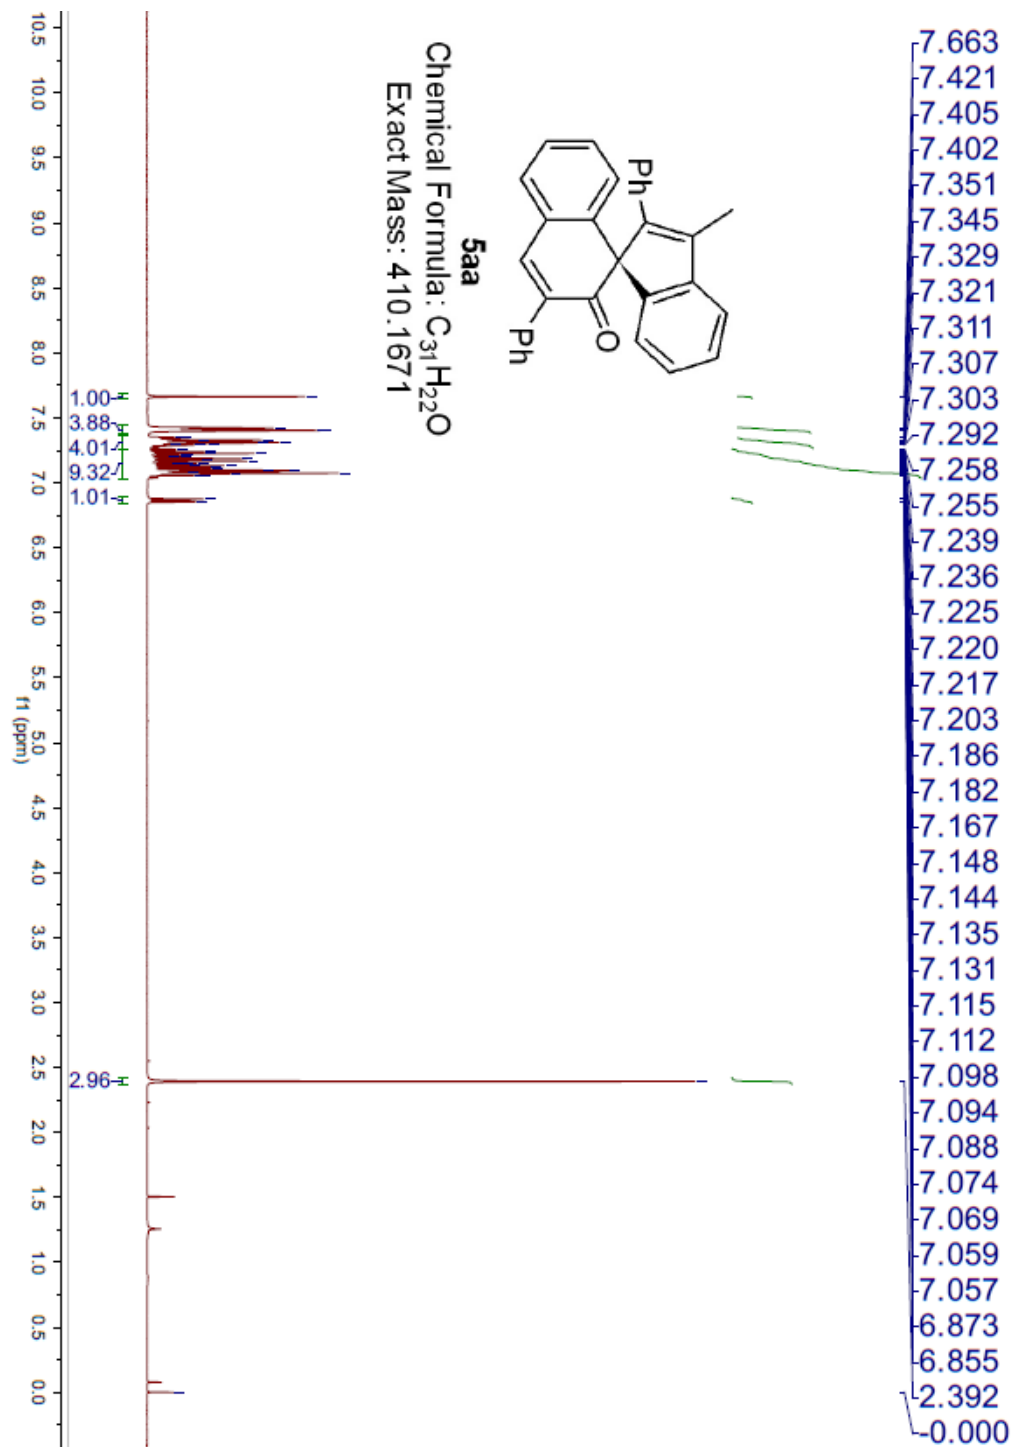



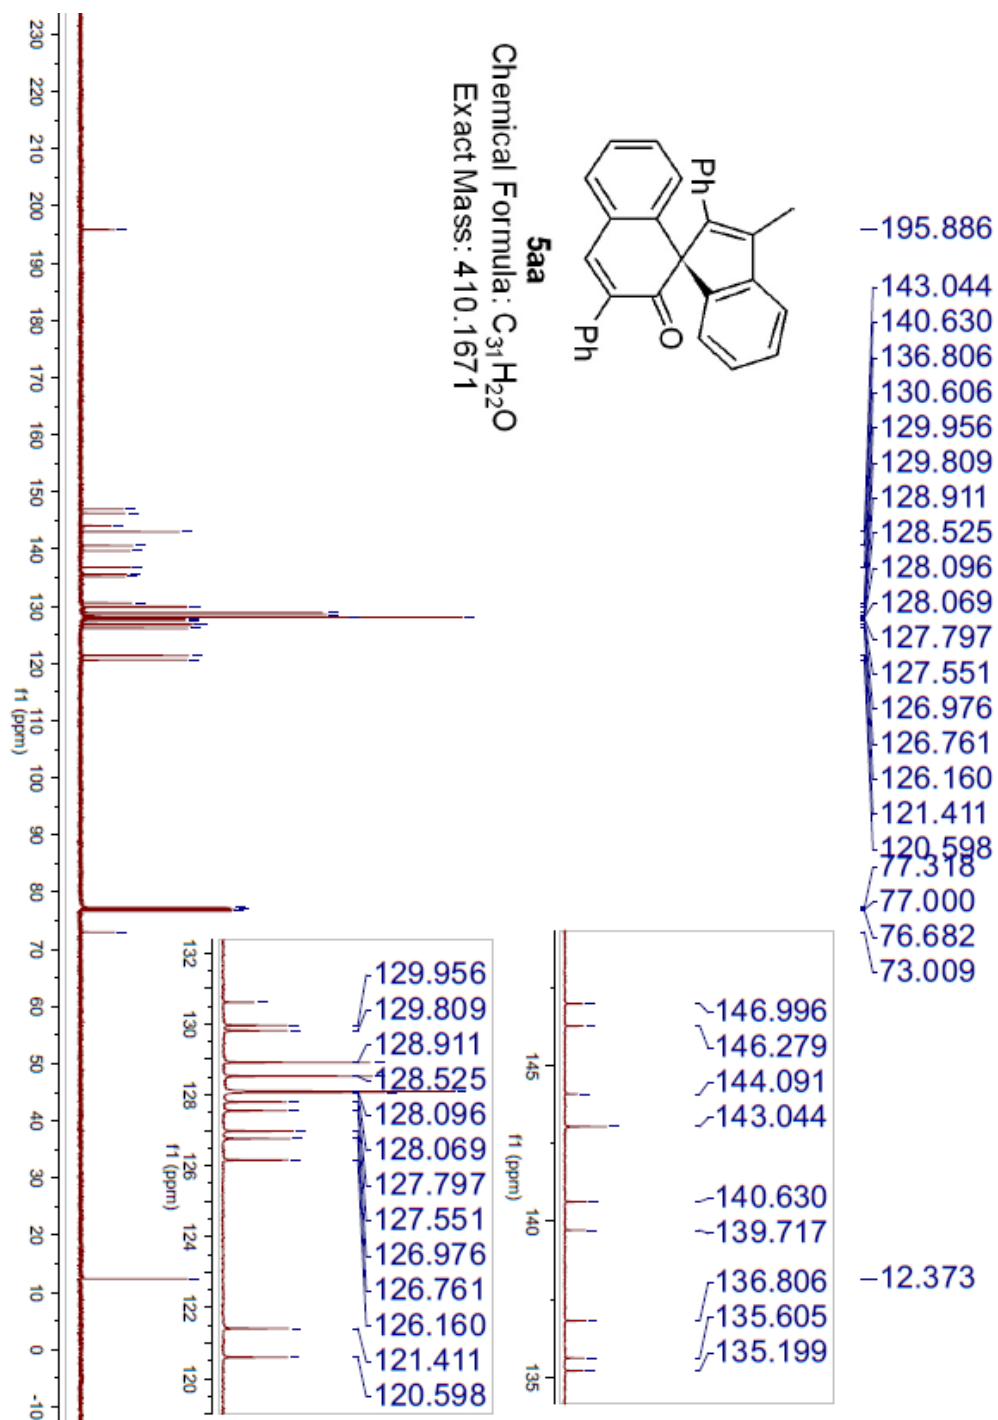

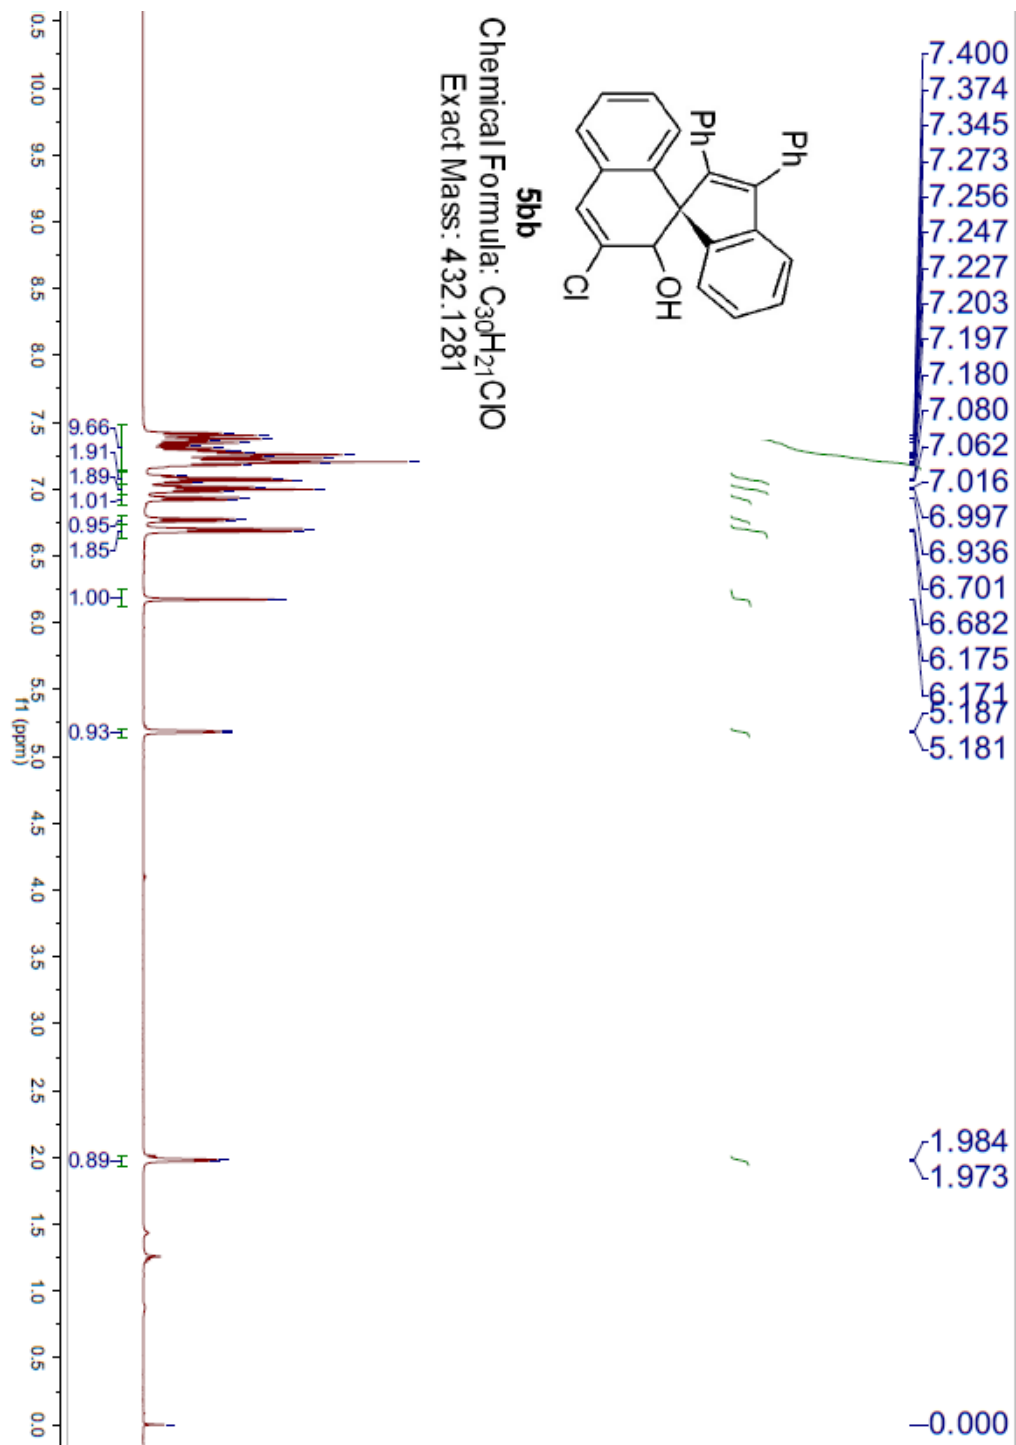

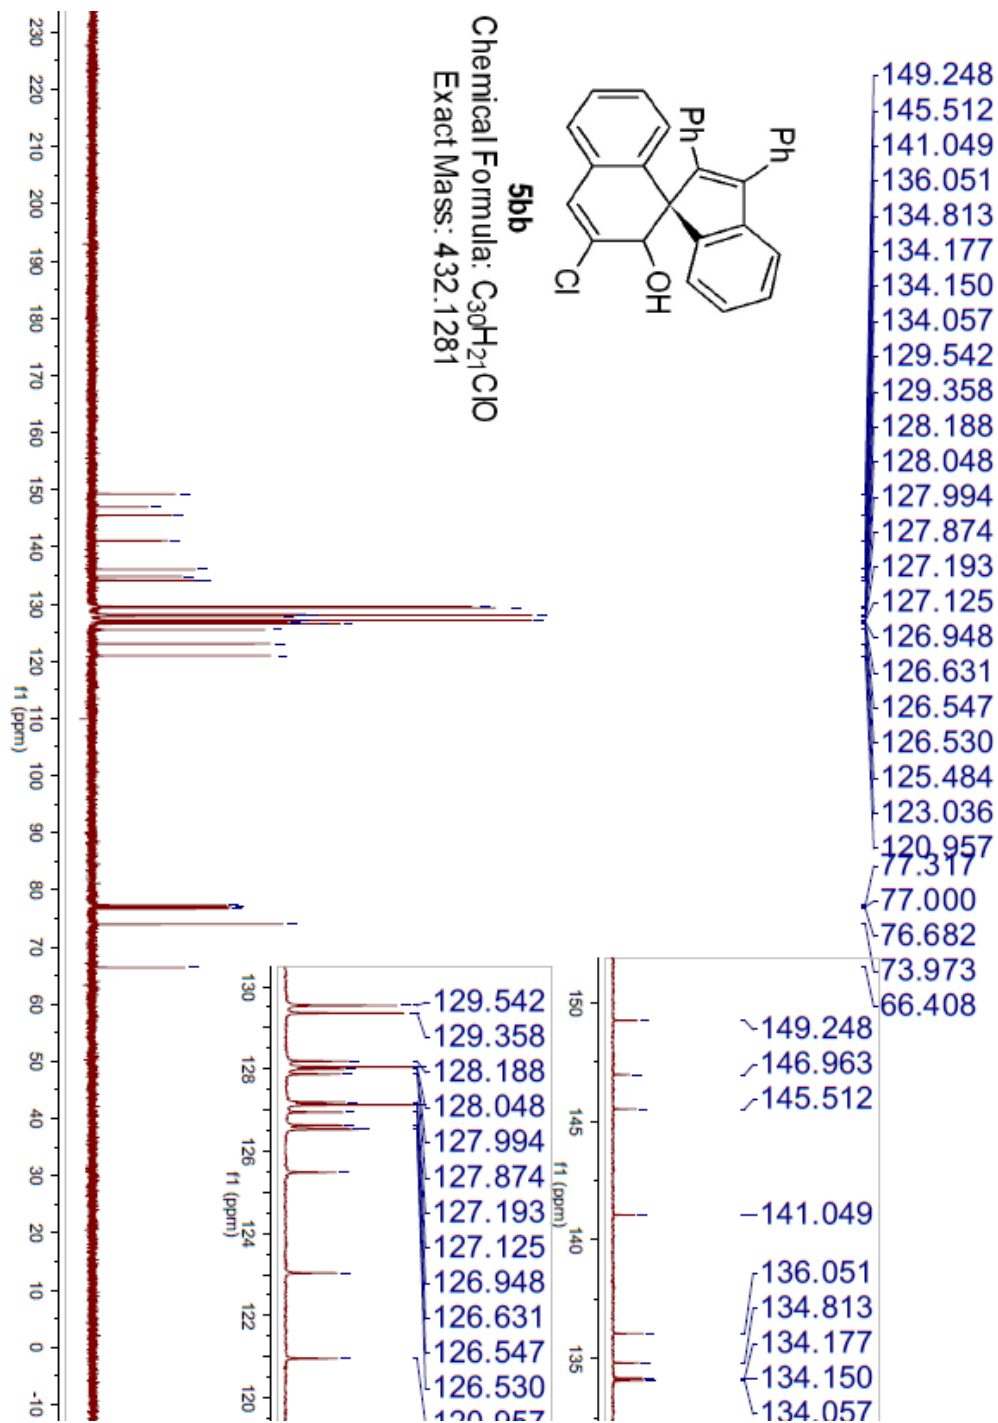

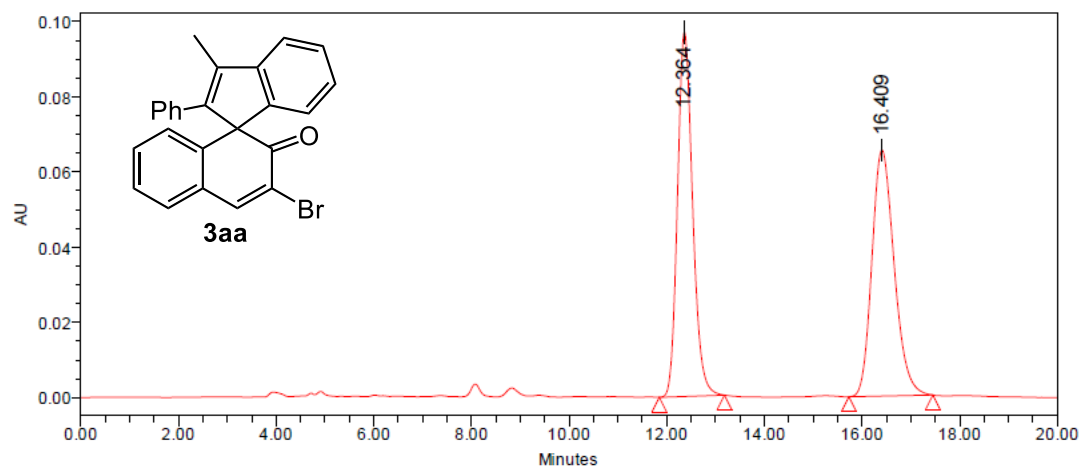

**Peak Results**

|   | Name | RT     | Area    | Height | % Area |
|---|------|--------|---------|--------|--------|
| 1 |      | 12.364 | 2083097 | 96989  | 50.10  |
| 2 |      | 16.409 | 2074558 | 65496  | 49.90  |

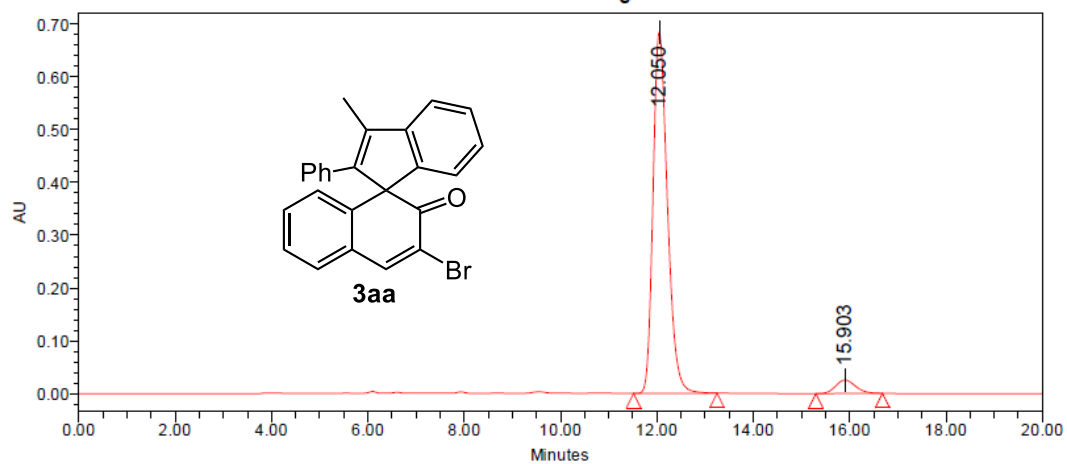

**Peak Results**

|   | Name | RT     | Area     | Height | % Area |
|---|------|--------|----------|--------|--------|
| 1 |      | 12.050 | 14203815 | 684099 | 95.11  |
| 2 |      | 15.903 | 730044   | 25499  | 4.89   |

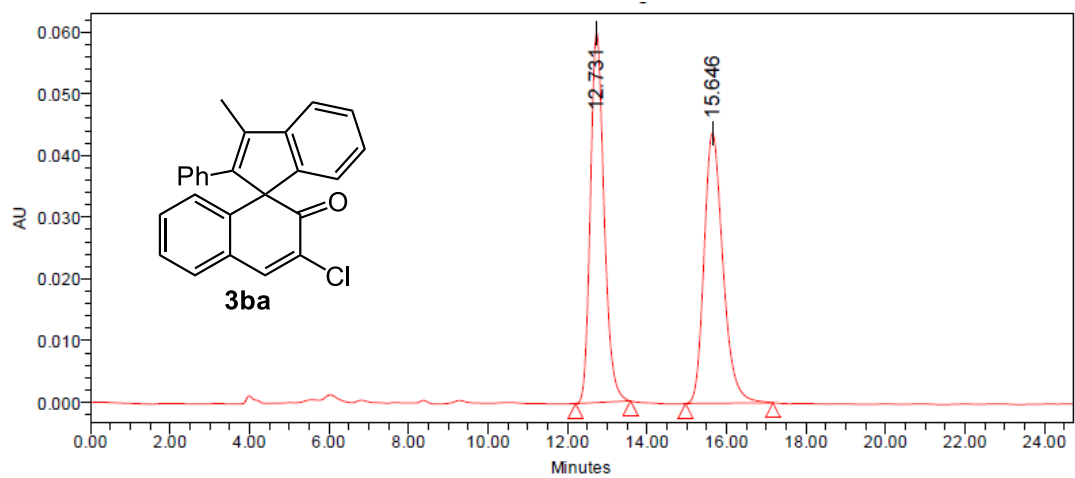

**Peak Results**

|   | Name | RT     | Area    | Height | % Area |
|---|------|--------|---------|--------|--------|
| 1 |      | 12.731 | 1433558 | 59935  | 49.83  |
| 2 |      | 15.646 | 1443323 | 43800  | 50.17  |

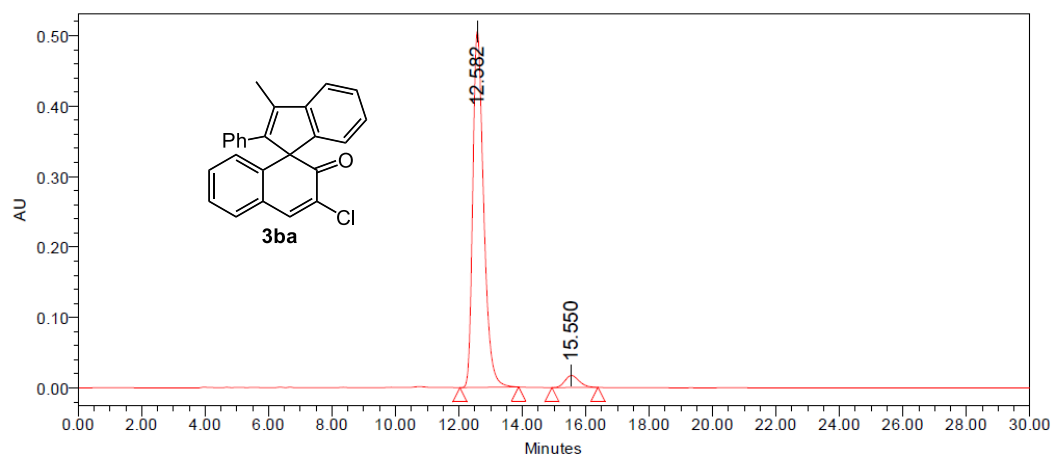

**Peak Results**

|   | Name | RT     | Area     | Height | % Area |
|---|------|--------|----------|--------|--------|
| 1 |      | 12.582 | 12030642 | 505434 | 95.73  |
| 2 |      | 15.550 | 537208   | 17103  | 4.27   |

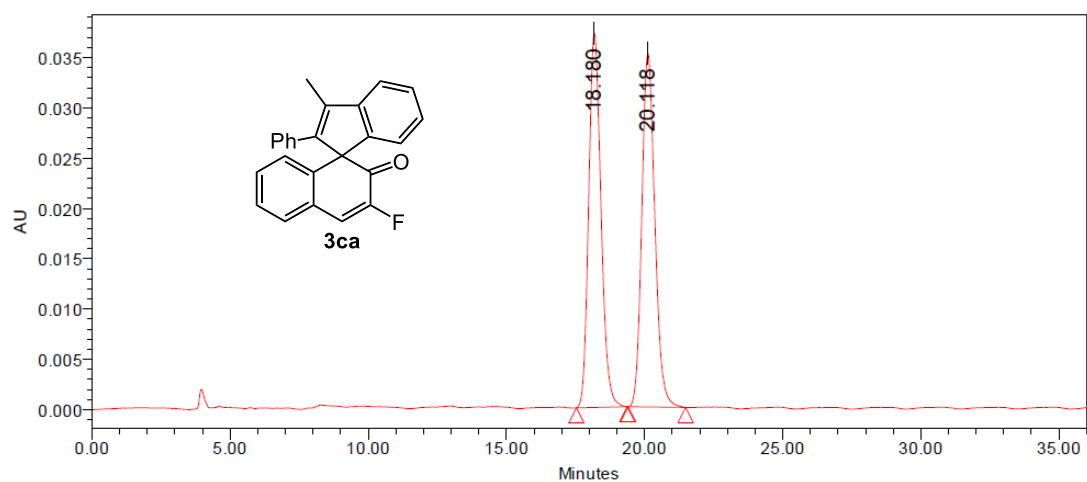

**Peak Results**

|   | Name | RT     | Area    | Height | % Area |
|---|------|--------|---------|--------|--------|
| 1 |      | 18.180 | 1149914 | 37207  | 50.00  |
| 2 |      | 20.118 | 1150021 | 35168  | 50.00  |

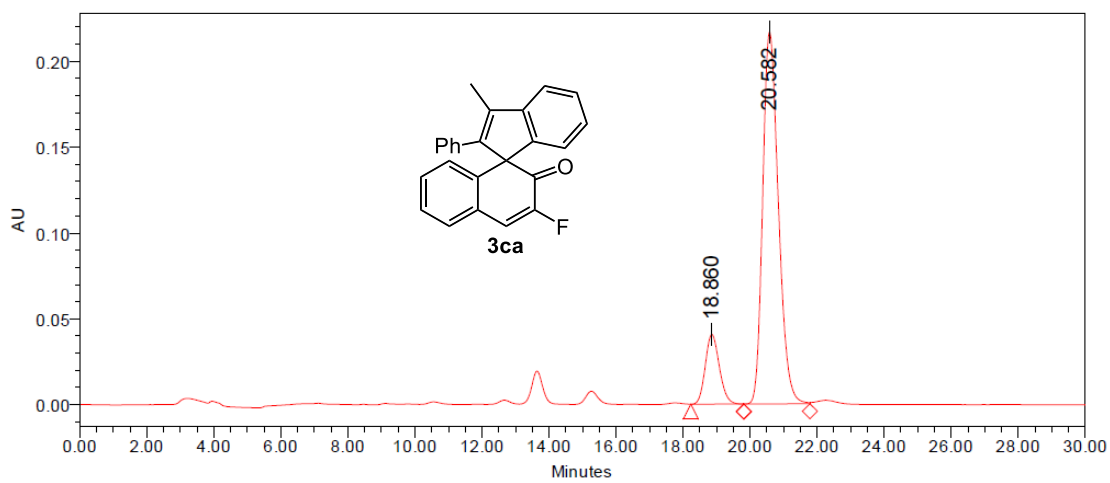

**Peak Results**

|   | Name | RT     | Area    | Height | % Area |
|---|------|--------|---------|--------|--------|
| 1 |      | 18.860 | 1182566 | 40674  | 14.37  |
| 2 |      | 20.582 | 7048669 | 216766 | 85.63  |

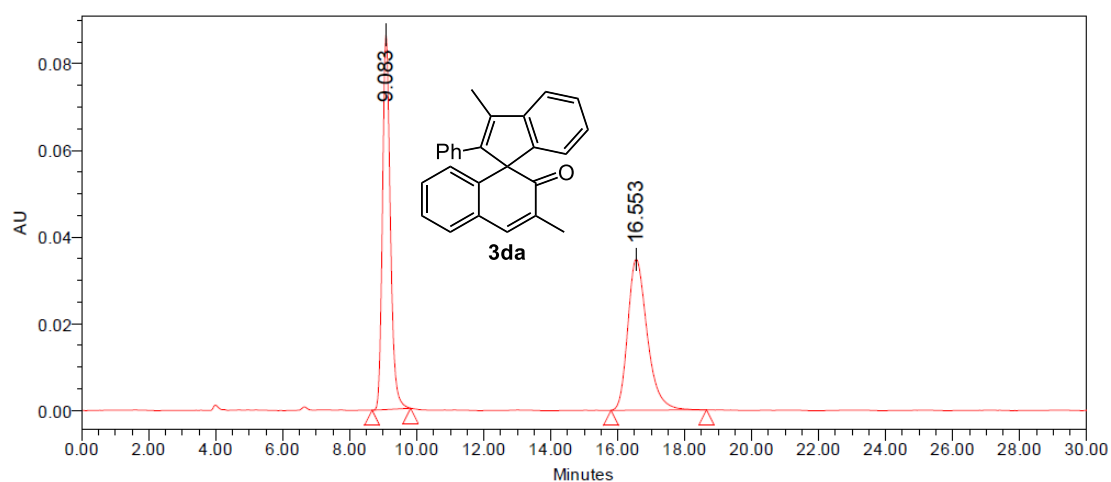

**Peak Results**

|   | Name | RT     | Area    | Height | % Area |
|---|------|--------|---------|--------|--------|
| 1 |      | 9.083  | 1412916 | 86457  | 50.18  |
| 2 |      | 16.553 | 1402851 | 34823  | 49.82  |

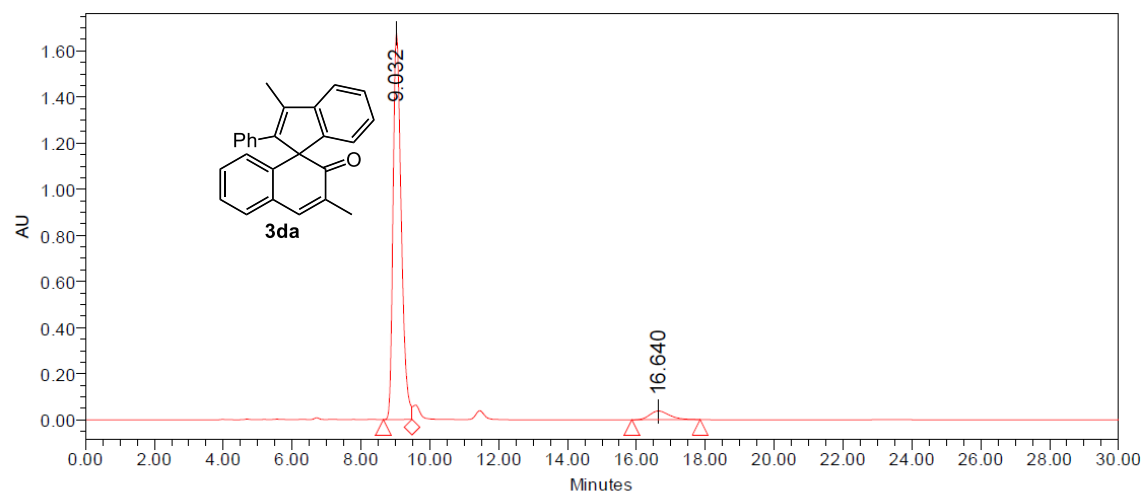

**Peak Results**

|   | Name | RT     | Area     | Height  | % Area |
|---|------|--------|----------|---------|--------|
| 1 |      | 9.032  | 27712565 | 1675591 | 94.88  |
| 2 |      | 16.640 | 1496787  | 37599   | 5.12   |

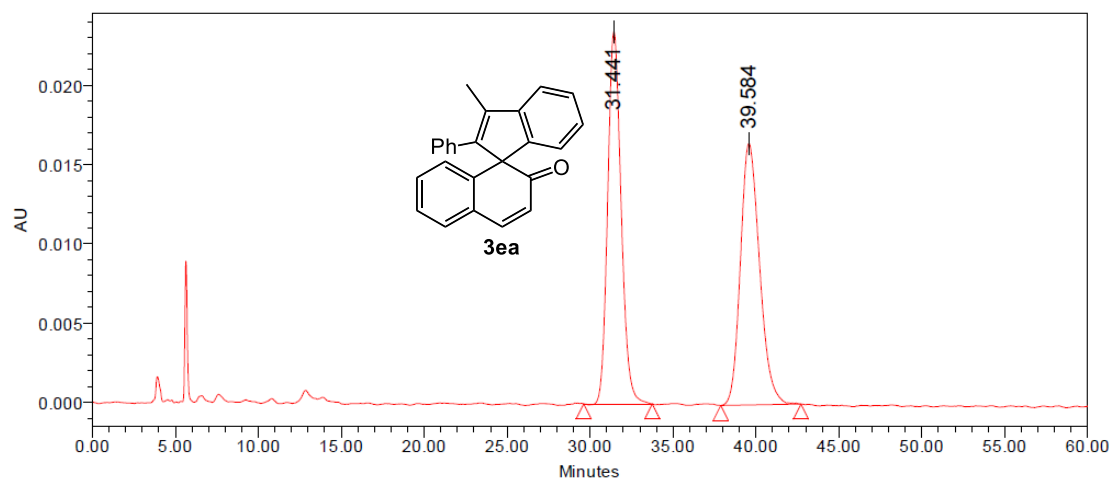

**Peak Results**

|   | Name | RT     | Area    | Height | % Area |
|---|------|--------|---------|--------|--------|
| 1 |      | 31.441 | 1326367 | 23463  | 50.04  |
| 2 |      | 39.584 | 1324418 | 16485  | 49.96  |

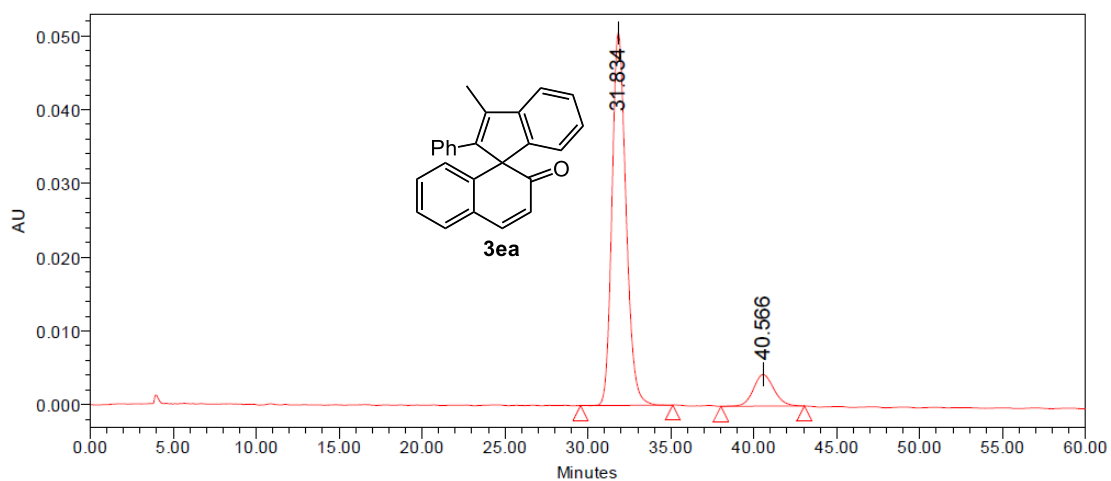

**Peak Results**

|   | Name | RT     | Area    | Height | % Area |
|---|------|--------|---------|--------|--------|
| 1 |      | 31.834 | 2979129 | 50506  | 89.00  |
| 2 |      | 40.566 | 368343  | 4278   | 11.00  |



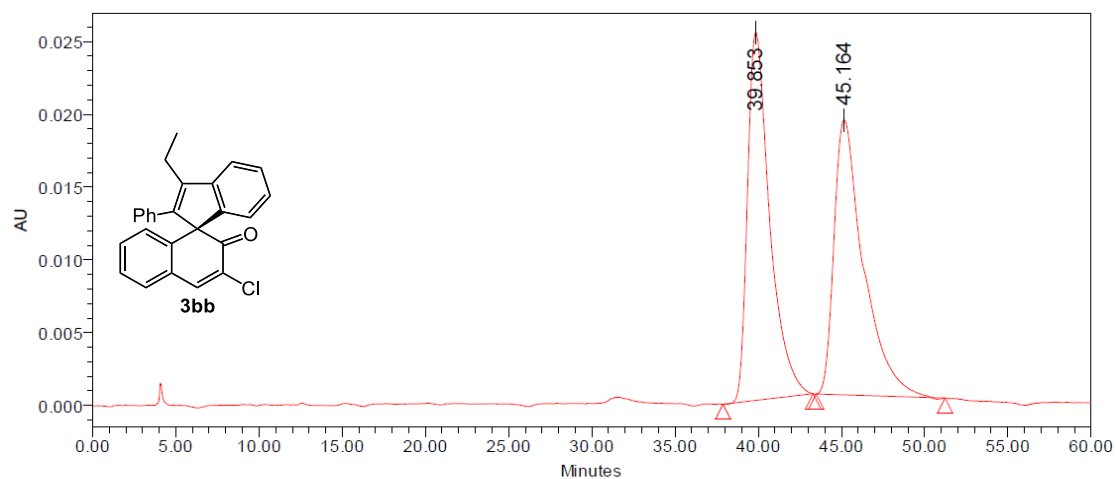

**Peak Results**

|   | Name | RT     | Area    | Height | % Area |
|---|------|--------|---------|--------|--------|
| 1 |      | 39.853 | 2347077 | 25284  | 50.21  |
| 2 |      | 45.164 | 2327279 | 18882  | 49.79  |

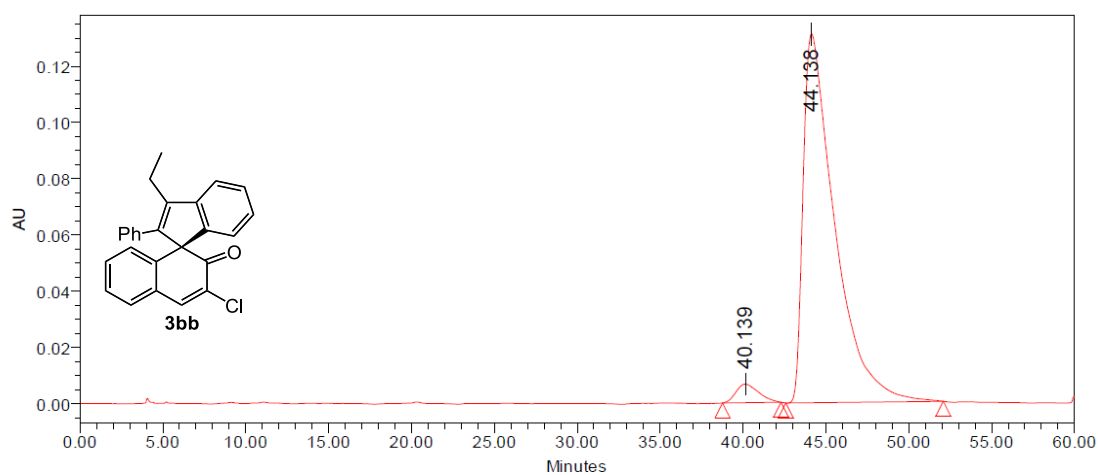

**Peak Results**

|   | Name | RT     | Area     | Height | % Area |
|---|------|--------|----------|--------|--------|
| 1 |      | 40.139 | 631448   | 6624   | 3.51   |
| 2 |      | 44.138 | 17379831 | 131169 | 96.49  |

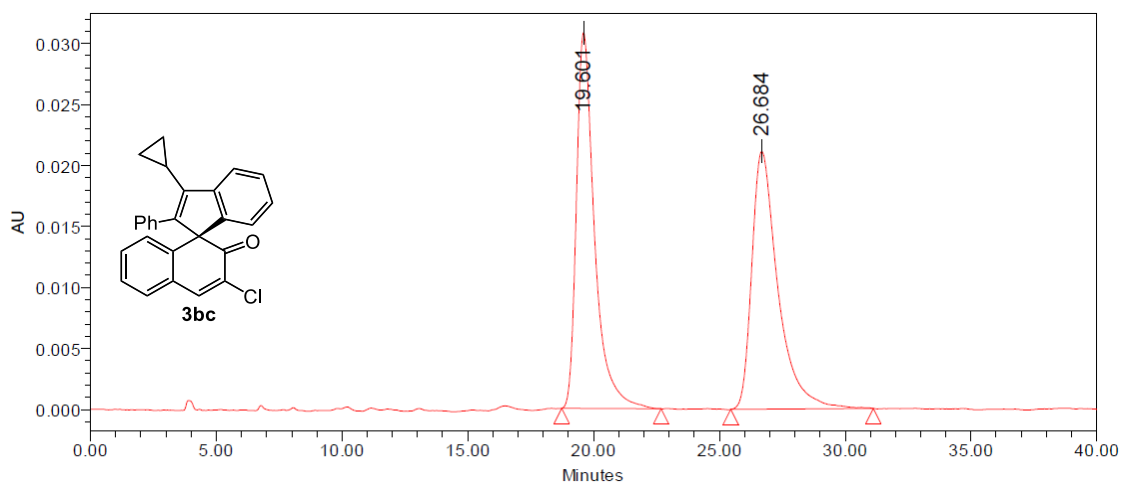

**Peak Results**

|   | Name | RT     | Area    | Height | % Area |
|---|------|--------|---------|--------|--------|
| 1 |      | 19.601 | 1541003 | 30803  | 50.20  |
| 2 |      | 26.684 | 1528432 | 21127  | 49.80  |

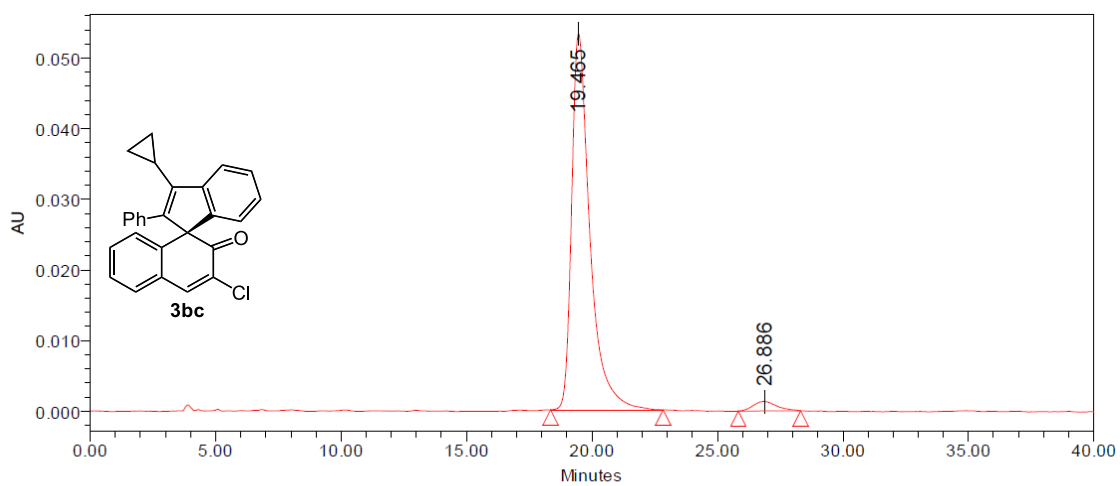

**Peak Results**

|   | Name | RT     | Area    | Height | % Area |
|---|------|--------|---------|--------|--------|
| 1 |      | 19.465 | 2687122 | 53276  | 96.85  |
| 2 |      | 26.886 | 87256   | 1337   | 3.15   |

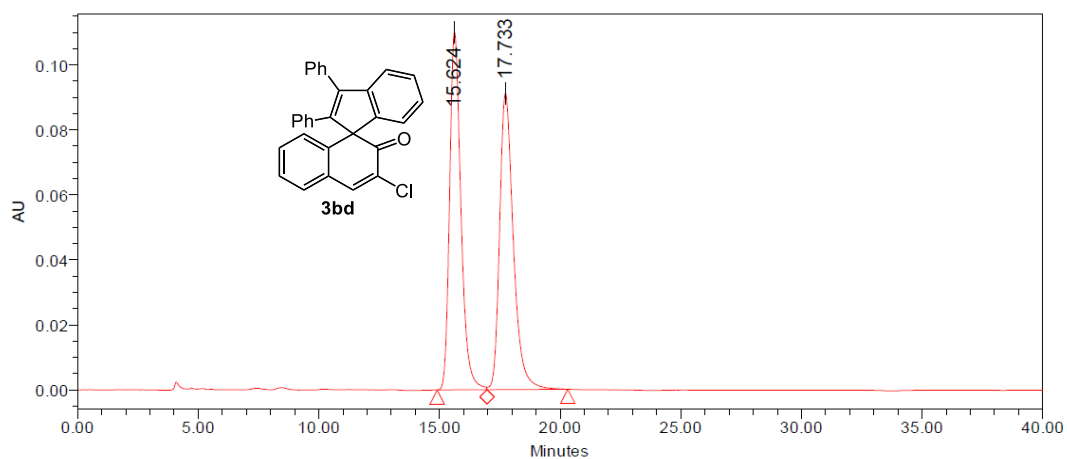

**Peak Results**

|   | Name | RT     | Area    | Height | % Area |
|---|------|--------|---------|--------|--------|
| 1 |      | 15.624 | 3578463 | 110130 | 49.82  |
| 2 |      | 17.733 | 3604795 | 91162  | 50.18  |

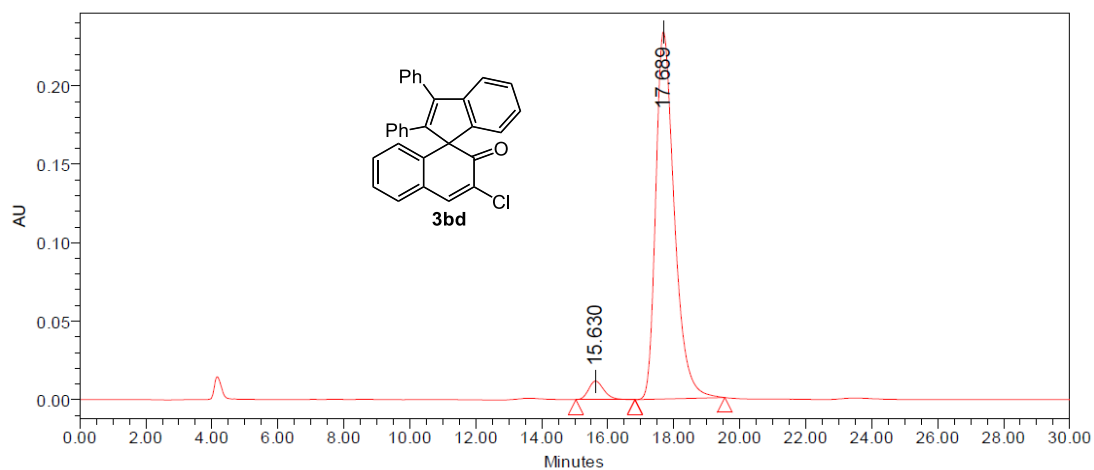

**Peak Results**

|   | Name | RT     | Area    | Height | % Area |
|---|------|--------|---------|--------|--------|
| 1 |      | 15.630 | 383736  | 11865  | 4.02   |
| 2 |      | 17.689 | 9164351 | 234042 | 95.98  |

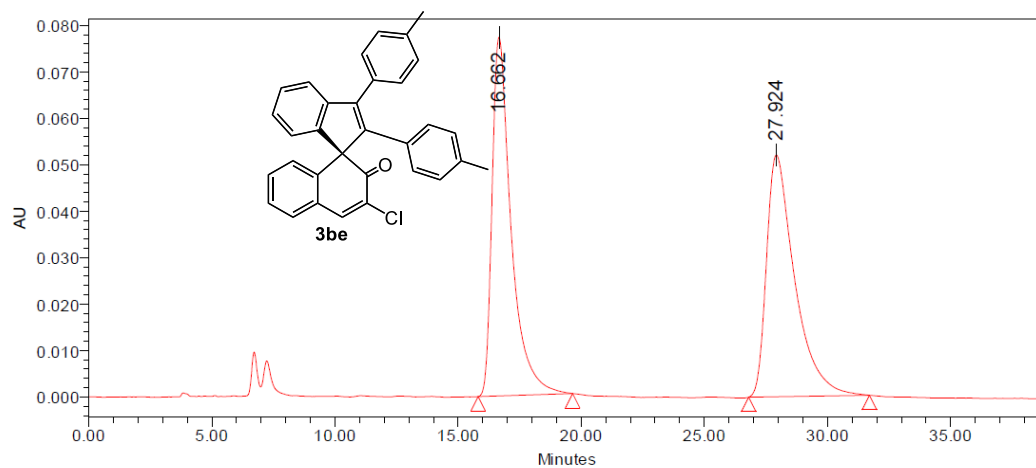

**Peak Results**

|   | Name | RT     | Area    | Height | % Area |
|---|------|--------|---------|--------|--------|
| 1 |      | 16.662 | 4157293 | 77206  | 50.09  |
| 2 |      | 27.924 | 4141871 | 52047  | 49.91  |

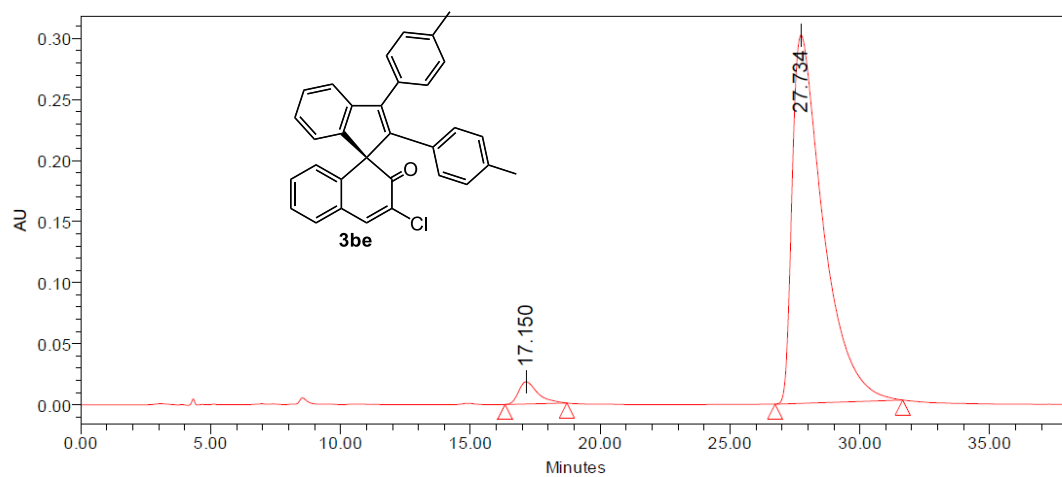

**Peak Results**

|   | Name | RT     | Area     | Height | % Area |
|---|------|--------|----------|--------|--------|
| 1 |      | 17.150 | 937445   | 18138  | 3.62   |
| 2 |      | 27.734 | 24953906 | 301491 | 96.38  |

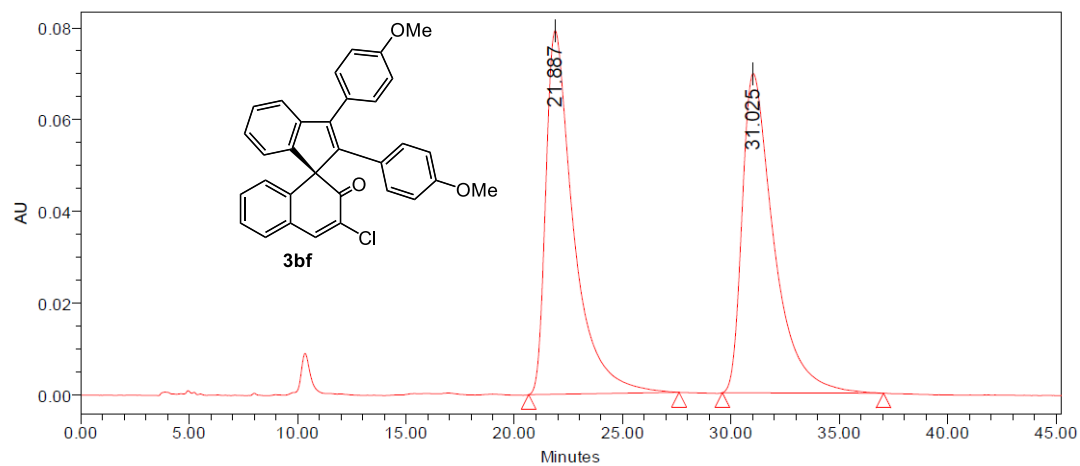

**Peak Results**

|   | Name | RT     | Area    | Height | % Area |
|---|------|--------|---------|--------|--------|
| 1 |      | 21.887 | 7060075 | 79207  | 49.94  |
| 2 |      | 31.025 | 7076305 | 69558  | 50.06  |

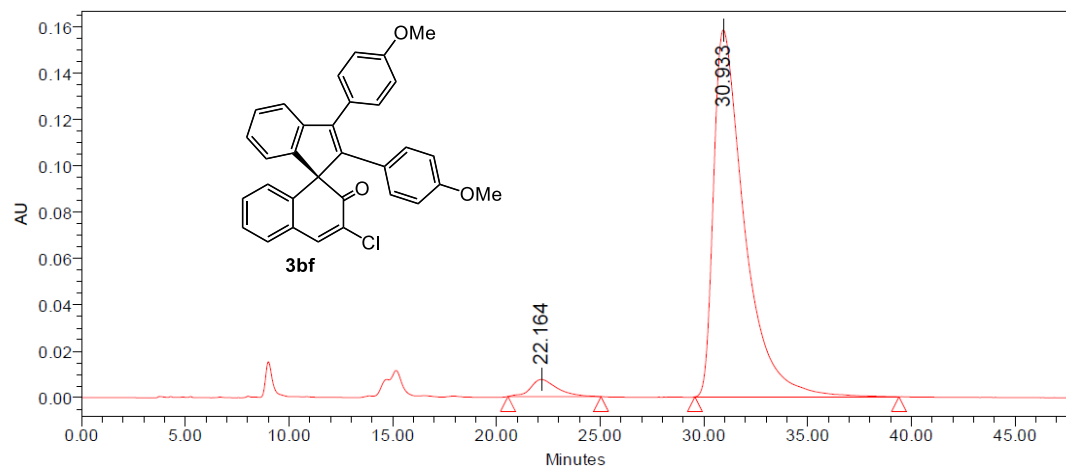

**Peak Results**

|   | Name | RT     | Area     | Height | % Area |
|---|------|--------|----------|--------|--------|
| 1 |      | 22.164 | 663468   | 7374   | 3.89   |
| 2 |      | 30.933 | 16385456 | 158378 | 96.11  |

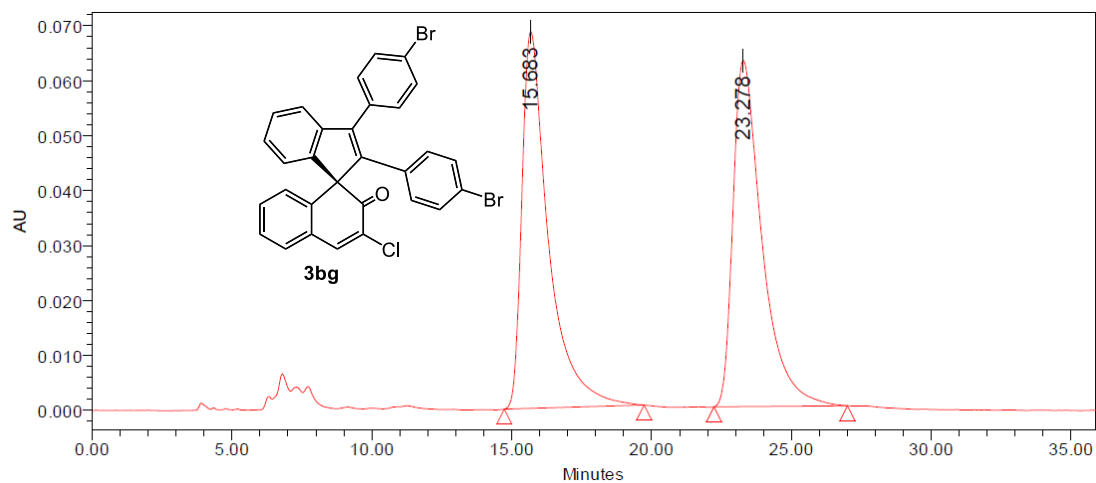

**Peak Results**

|   | Name | RT     | Area    | Height | % Area |
|---|------|--------|---------|--------|--------|
| 1 |      | 15.683 | 4531738 | 68562  | 49.92  |
| 2 |      | 23.278 | 4546914 | 63048  | 50.08  |

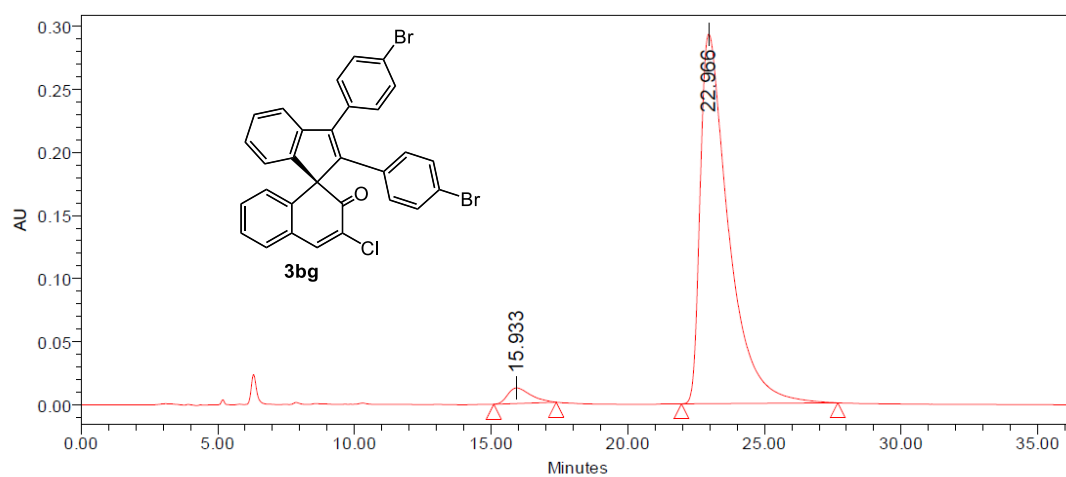

**Peak Results**

|   | Name | RT     | Area     | Height | % Area |
|---|------|--------|----------|--------|--------|
| 1 |      | 15.933 | 720699   | 12341  | 3.31   |
| 2 |      | 22.966 | 21044641 | 292859 | 96.69  |

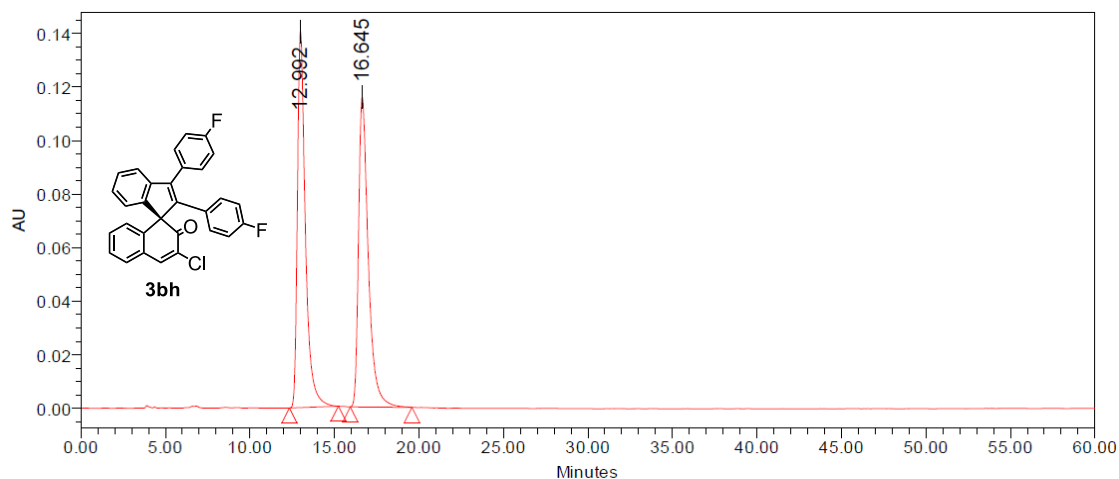

**Peak Results**

|   | Name | RT     | Area    | Height | % Area |
|---|------|--------|---------|--------|--------|
| 1 |      | 12.992 | 4631143 | 140632 | 49.92  |
| 2 |      | 16.645 | 4645663 | 115734 | 50.08  |

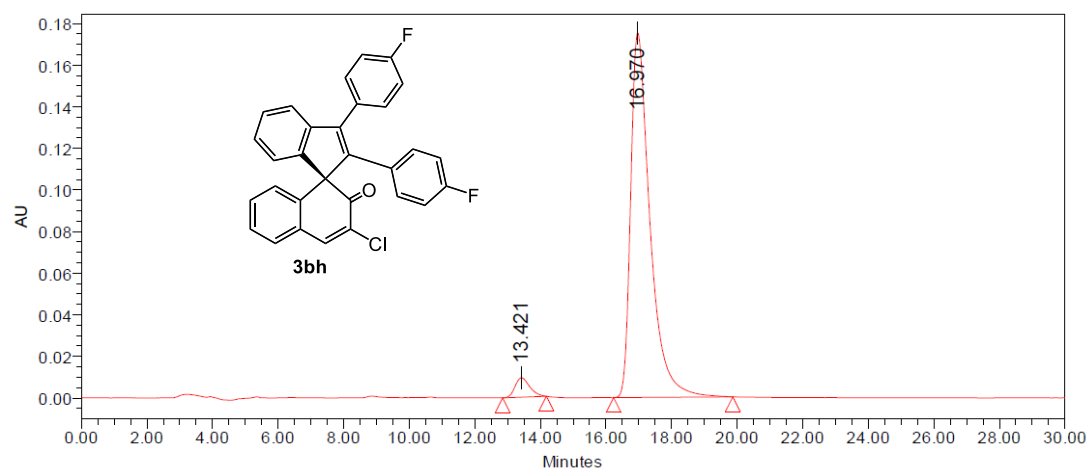

**Peak Results**

|   | Name | RT     | Area    | Height | % Area |
|---|------|--------|---------|--------|--------|
| 1 |      | 13.421 | 289554  | 9366   | 3.89   |
| 2 |      | 16.970 | 7153291 | 175267 | 96.11  |

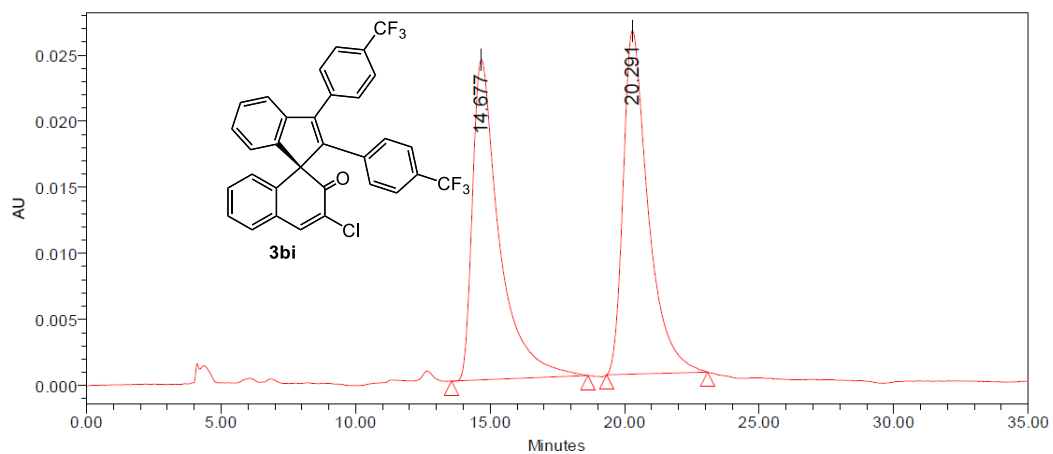

**Peak Results**

|   | Name | RT     | Area    | Height | % Area |
|---|------|--------|---------|--------|--------|
| 1 |      | 14.677 | 1675777 | 24240  | 49.91  |
| 2 |      | 20.291 | 1681804 | 25996  | 50.09  |

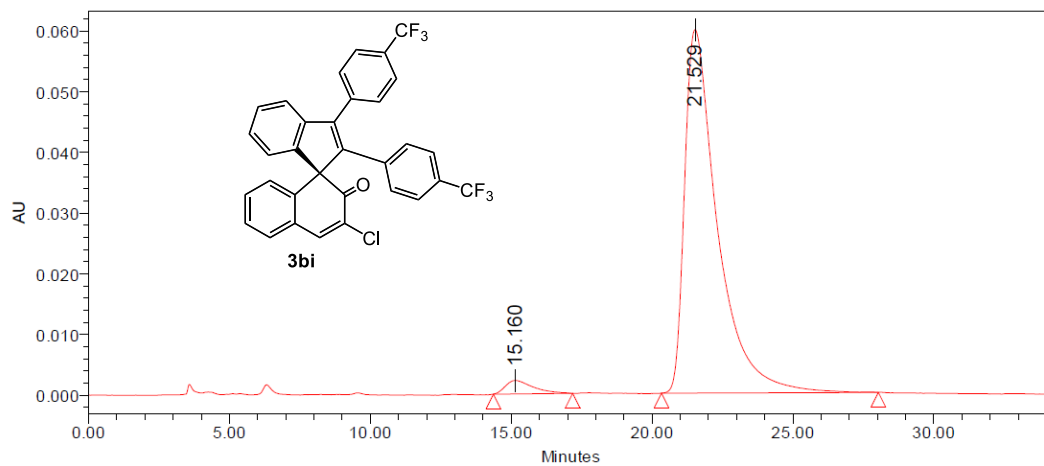

**Peak Results**

|   | Name | RT     | Area    | Height | % Area |
|---|------|--------|---------|--------|--------|
| 1 |      | 15.160 | 151467  | 2207   | 3.03   |
| 2 |      | 21.529 | 4852417 | 59826  | 96.97  |



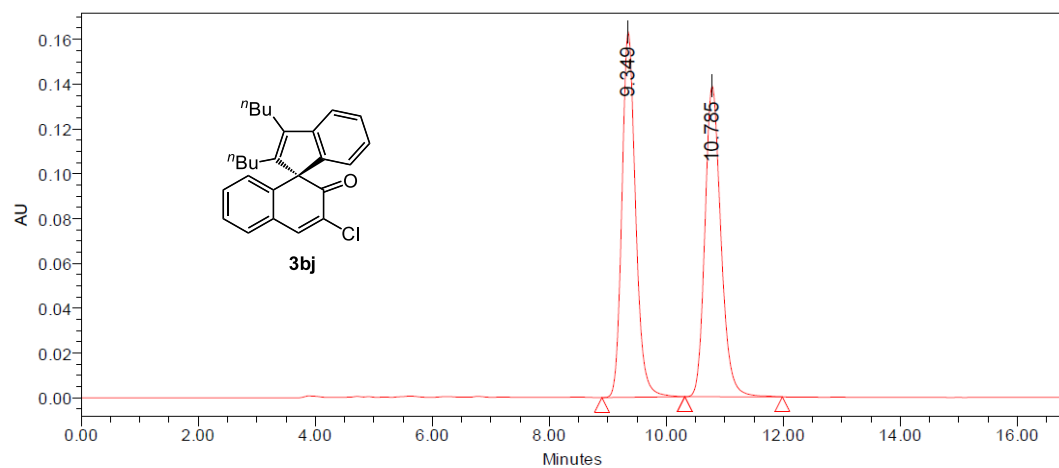

**Peak Results**

|   | Name | RT     | Area    | Height | % Area |
|---|------|--------|---------|--------|--------|
| 1 |      | 9.349  | 2657598 | 163155 | 50.20  |
| 2 |      | 10.785 | 2636173 | 138791 | 49.80  |

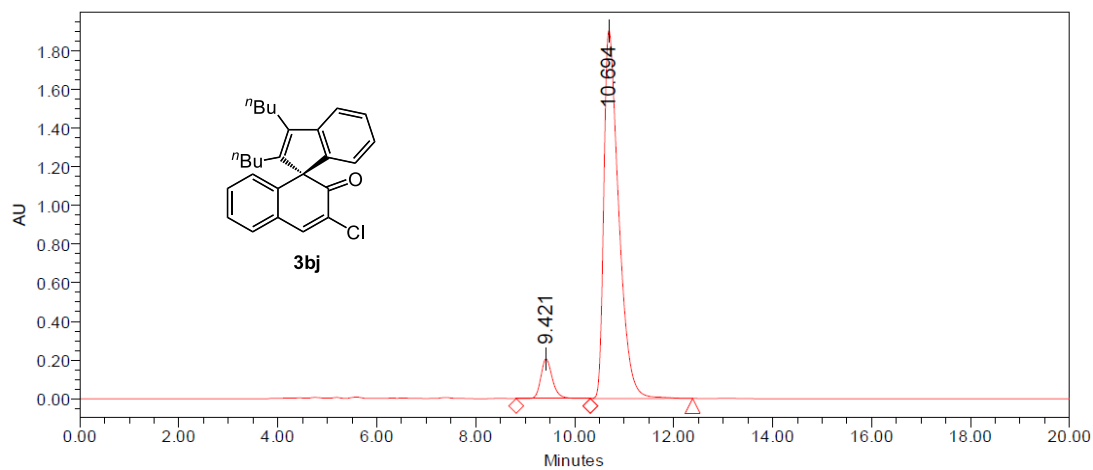

**Peak Results**

|   | Name | RT     | Area     | Height  | % Area |
|---|------|--------|----------|---------|--------|
| 1 |      | 9.421  | 3318771  | 205163  | 7.72   |
| 2 |      | 10.694 | 39652553 | 1902179 | 92.28  |

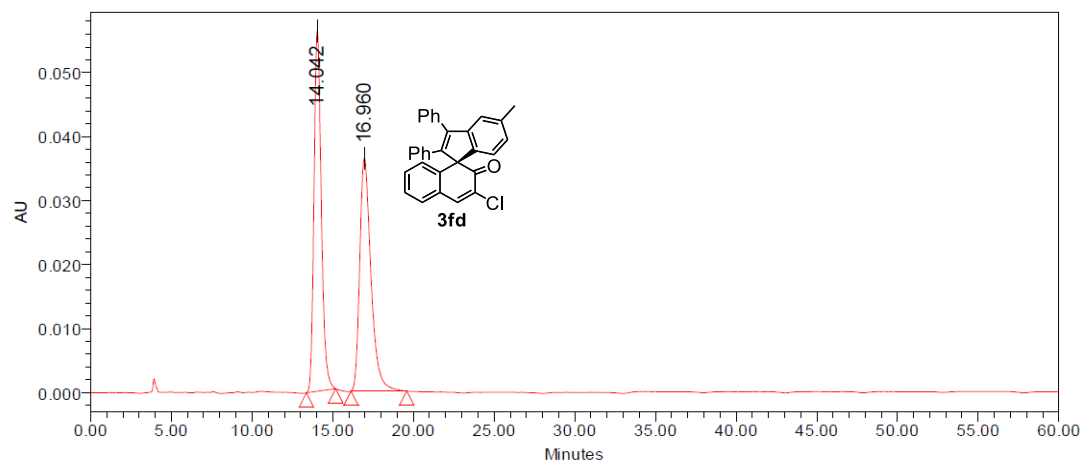

**Peak Results**

|   | Name | RT     | Area    | Height | % Area |
|---|------|--------|---------|--------|--------|
| 1 |      | 14.042 | 1769119 | 56382  | 50.14  |
| 2 |      | 16.960 | 1759560 | 36406  | 49.86  |

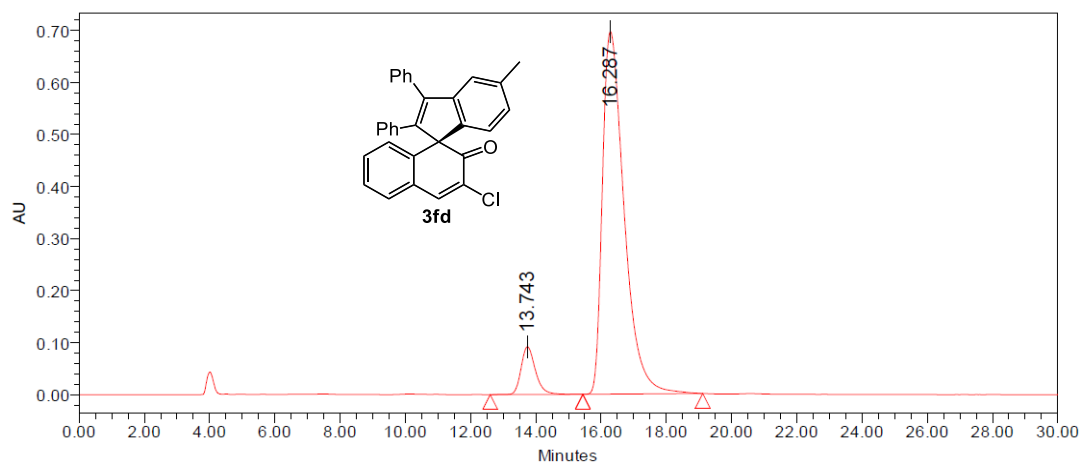

**Peak Results**

|   | Name | RT     | Area     | Height | % Area |
|---|------|--------|----------|--------|--------|
| 1 |      | 13.743 | 2800020  | 91847  | 7.98   |
| 2 |      | 16.287 | 32278665 | 697018 | 92.02  |

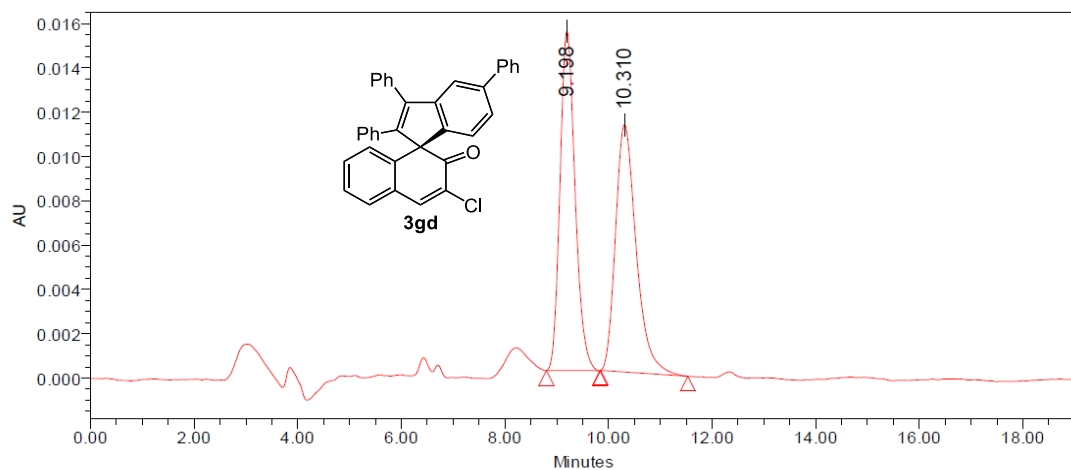

**Peak Results**

|   | Name | RT     | Area   | Height | % Area |
|---|------|--------|--------|--------|--------|
| 1 |      | 9.198  | 310197 | 15333  | 50.00  |
| 2 |      | 10.310 | 310165 | 11173  | 50.00  |

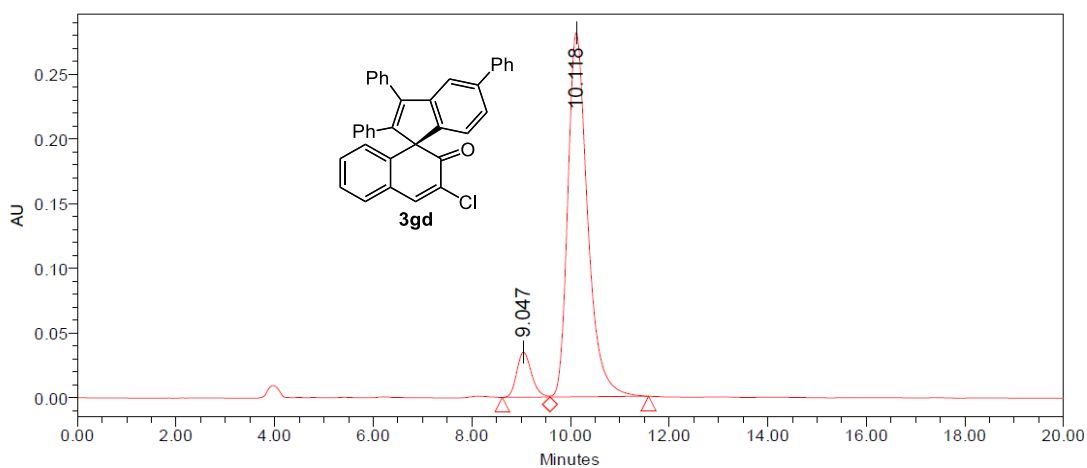

**Peak Results**

|   | Name | RT     | Area    | Height | % Area |
|---|------|--------|---------|--------|--------|
| 1 |      | 9.047  | 722550  | 34874  | 8.44   |
| 2 |      | 10.118 | 7838037 | 281317 | 91.56  |

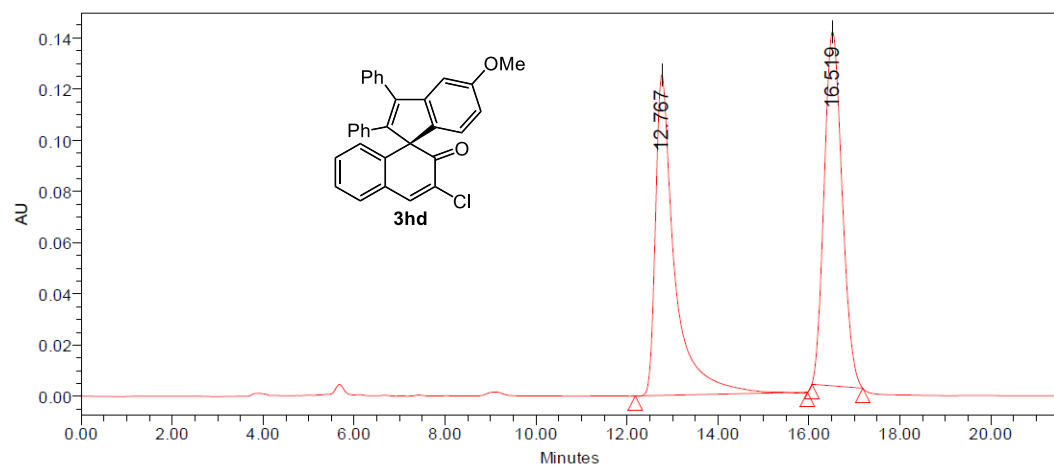

#### Peak Results

|   | Name | RT     | Area    | Height | % Area |
|---|------|--------|---------|--------|--------|
| 1 |      | 12.767 | 3677498 | 125297 | 49.25  |
| 2 |      | 16.519 | 3788977 | 138376 | 50.75  |

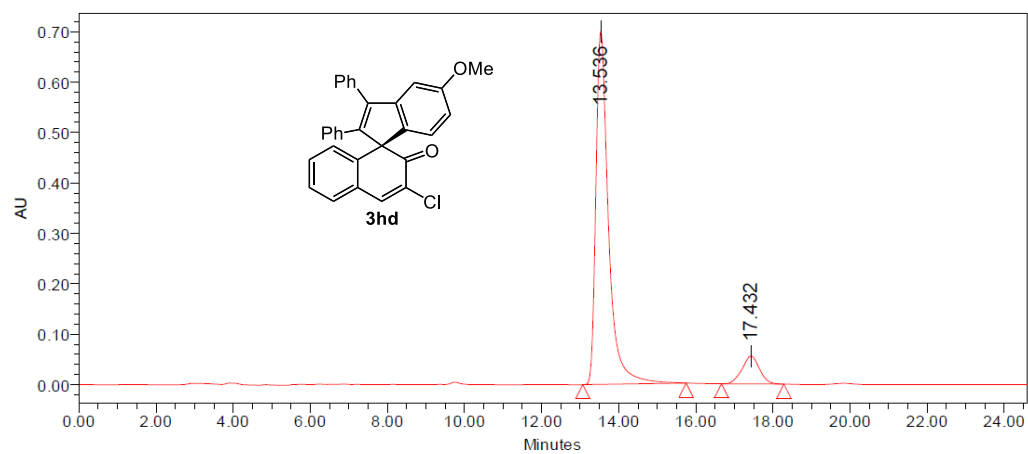

#### Peak Results

|   | Name | RT     | Area     | Height | % Area |
|---|------|--------|----------|--------|--------|
| 1 |      | 13.536 | 15937226 | 700420 | 90.18  |
| 2 |      | 17.432 | 1734727  | 55363  | 9.82   |

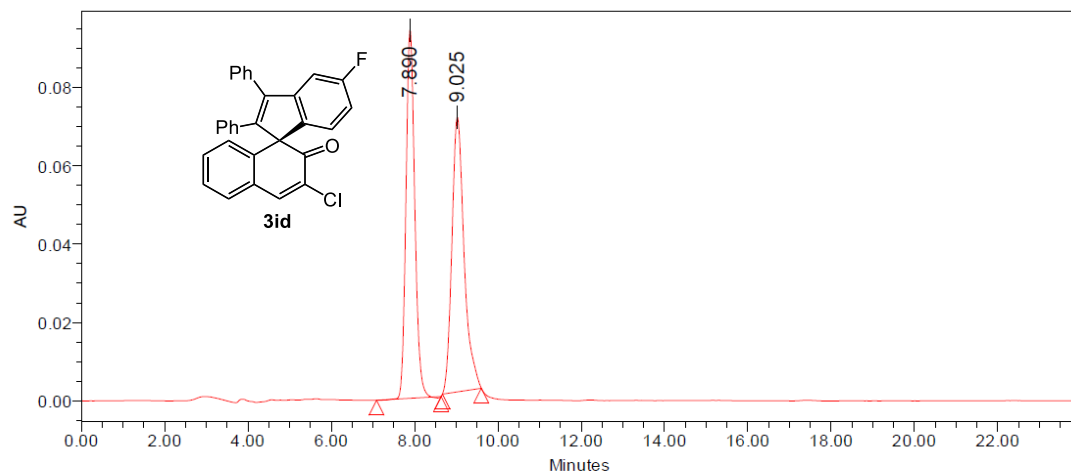

**Peak Results**

|   | Name | RT    | Area    | Height | % Area |
|---|------|-------|---------|--------|--------|
| 1 |      | 7.890 | 1385545 | 94102  | 49.24  |
| 2 |      | 9.025 | 1428390 | 70095  | 50.76  |

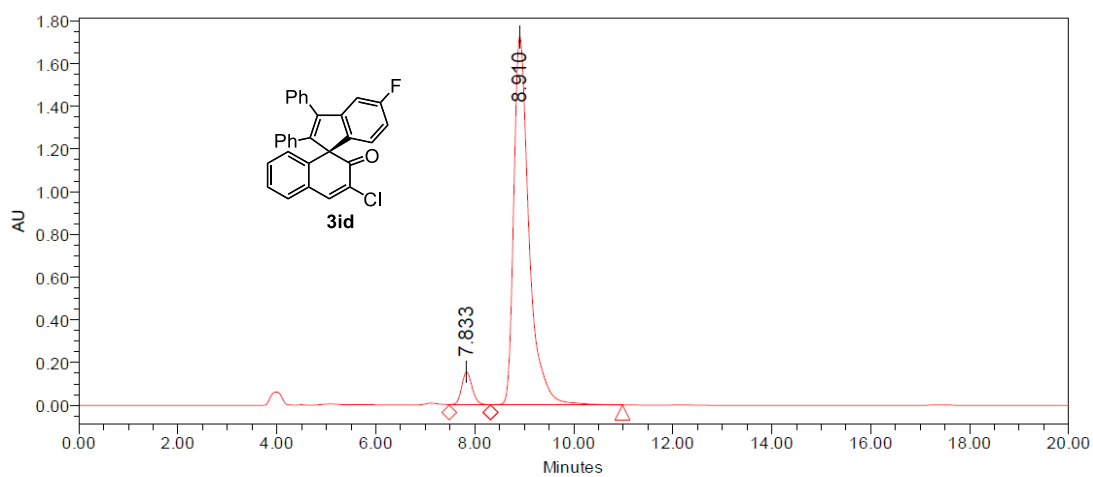

**Peak Results**

|   | Name | RT    | Area     | Height  | % Area |
|---|------|-------|----------|---------|--------|
| 1 |      | 7.833 | 2328241  | 155391  | 5.92   |
| 2 |      | 8.910 | 36998634 | 1725109 | 94.08  |

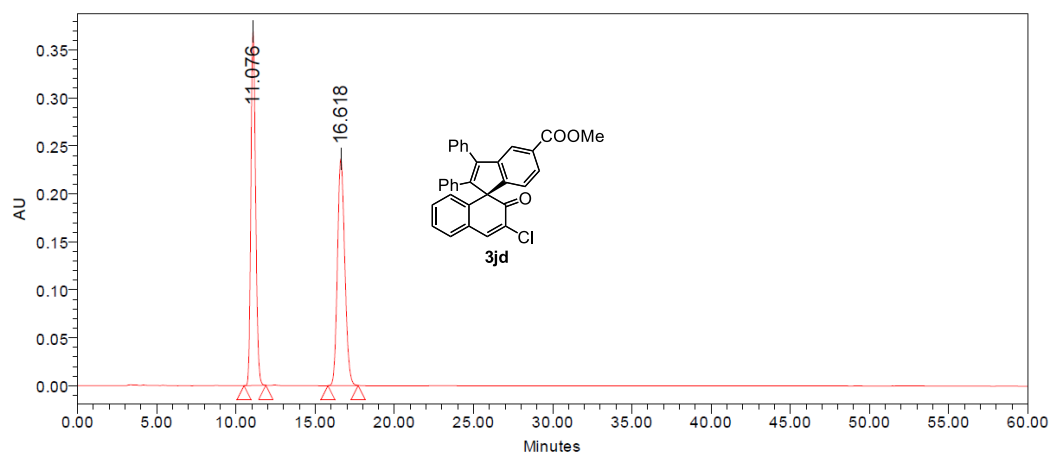

#### Peak Results

|   | Name | RT     | Area    | Height | % Area |
|---|------|--------|---------|--------|--------|
| 1 |      | 11.076 | 7620995 | 369659 | 49.94  |
| 2 |      | 16.618 | 7638328 | 236355 | 50.06  |

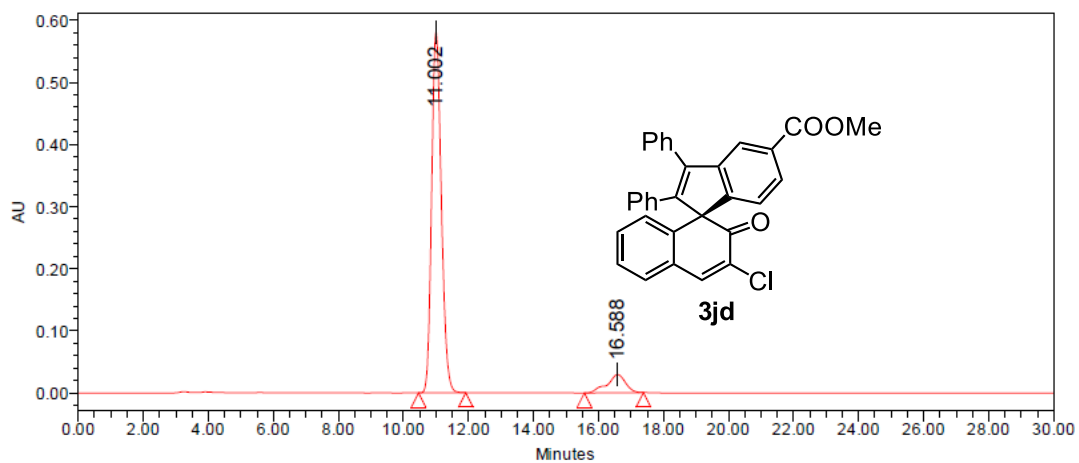

#### Peak Results

|   | Name | RT     | Area     | Height | % Area |
|---|------|--------|----------|--------|--------|
| 1 |      | 11.002 | 12028787 | 581185 | 91.24  |
| 2 |      | 16.588 | 1154498  | 29261  | 8.76   |

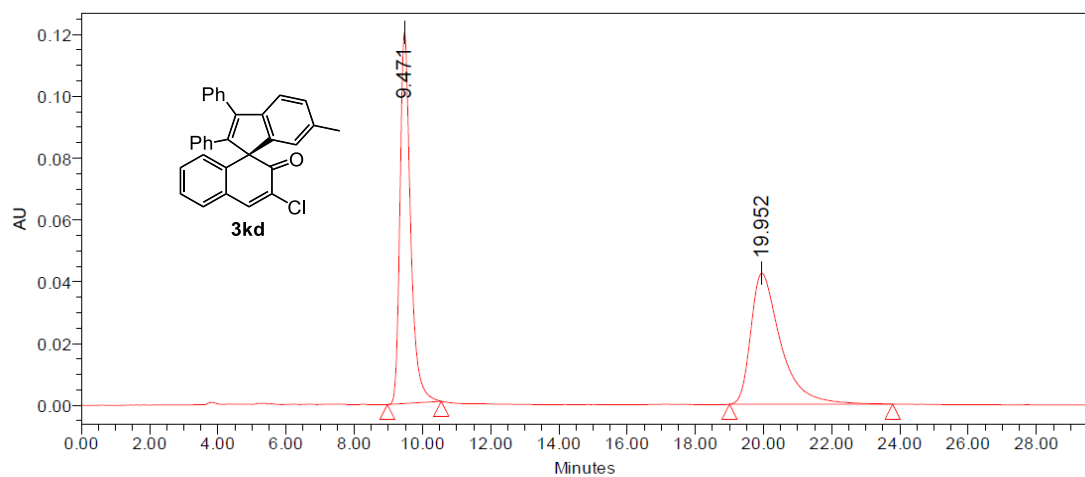

**Peak Results**

|   | Name | RT     | Area    | Height | % Area |
|---|------|--------|---------|--------|--------|
| 1 |      | 9.471  | 2580088 | 120194 | 50.07  |
| 2 |      | 19.952 | 2572435 | 42363  | 49.93  |

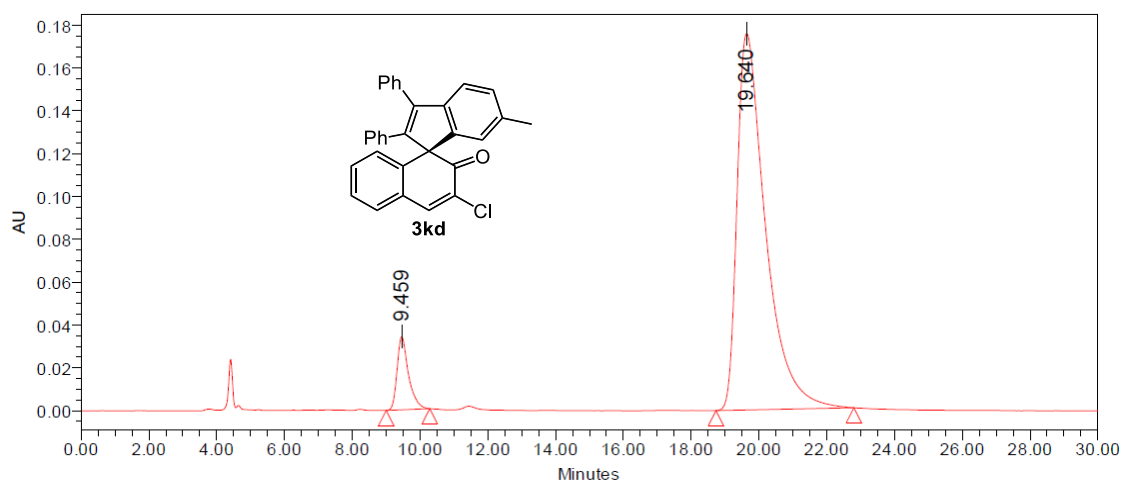

**Peak Results**

|   | Name | RT     | Area     | Height | % Area |
|---|------|--------|----------|--------|--------|
| 1 |      | 9.459  | 796737   | 34113  | 7.21   |
| 2 |      | 19.640 | 10259087 | 175762 | 92.79  |

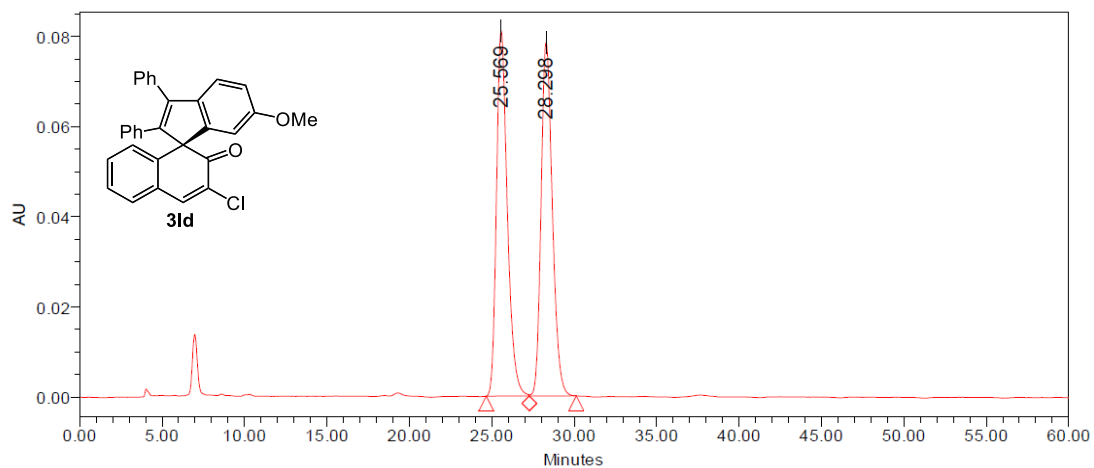

**Peak Results**

|   | Name | RT     | Area    | Height | % Area |
|---|------|--------|---------|--------|--------|
| 1 |      | 25.569 | 3710189 | 81035  | 49.92  |
| 2 |      | 28.298 | 3721382 | 78439  | 50.08  |

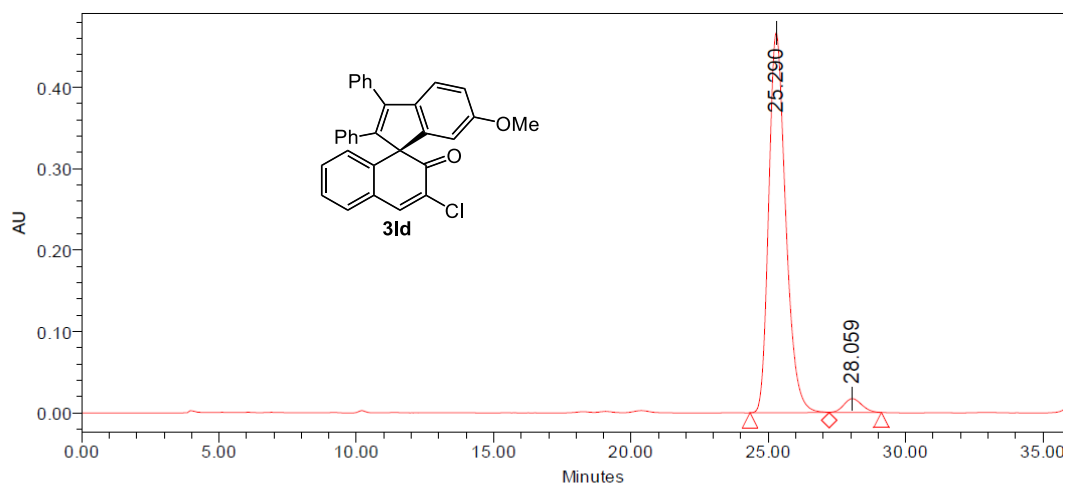

**Peak Results**

|   | Name | RT     | Area     | Height | % Area |
|---|------|--------|----------|--------|--------|
| 1 |      | 25.290 | 20082534 | 466735 | 96.24  |
| 2 |      | 28.059 | 784162   | 17078  | 3.76   |



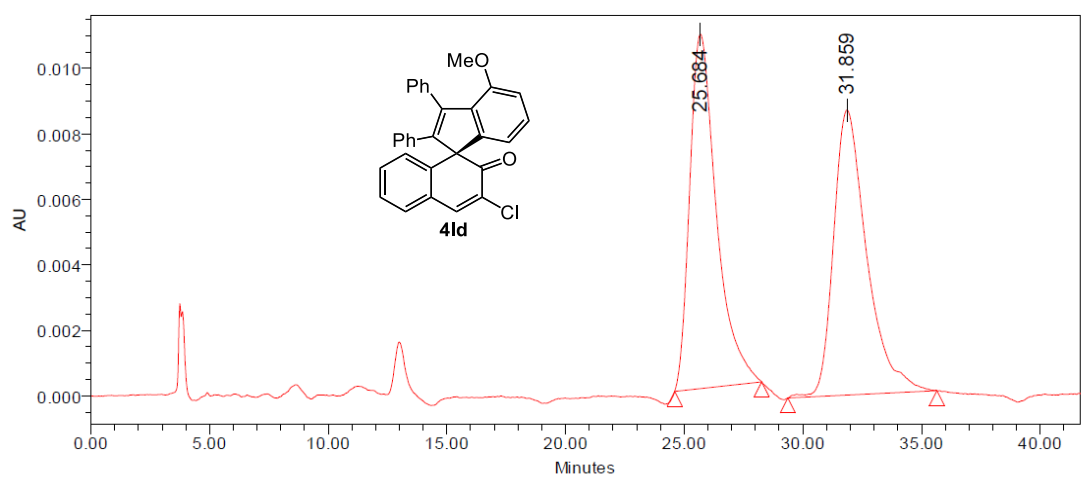

**Peak Results**

|   | Name | RT     | Area   | Height | % Area |
|---|------|--------|--------|--------|--------|
| 1 |      | 25.684 | 848629 | 10818  | 50.08  |
| 2 |      | 31.859 | 845791 | 8702   | 49.92  |

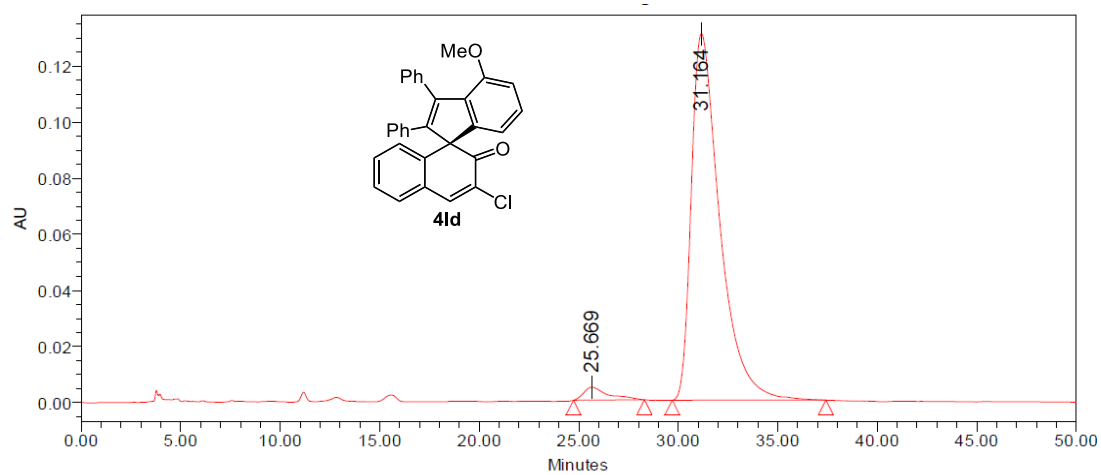

**Peak Results**

|   | Name | RT     | Area     | Height | % Area |
|---|------|--------|----------|--------|--------|
| 1 |      | 25.669 | 397133   | 4591   | 2.97   |
| 2 |      | 31.164 | 12995138 | 130590 | 97.03  |

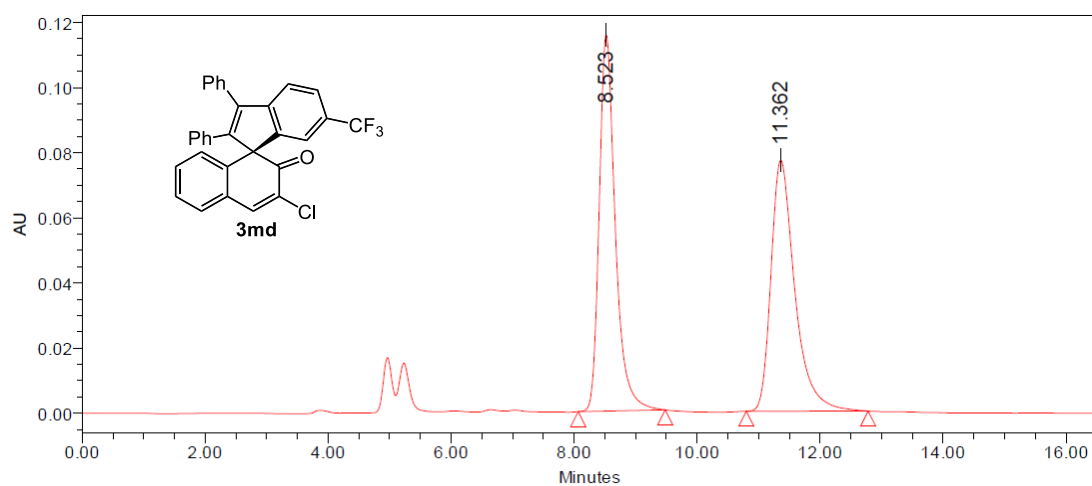

#### Peak Results

|   | Name | RT     | Area    | Height | % Area |
|---|------|--------|---------|--------|--------|
| 1 |      | 8.523  | 2095313 | 115686 | 50.30  |
| 2 |      | 11.362 | 2070596 | 77020  | 49.70  |

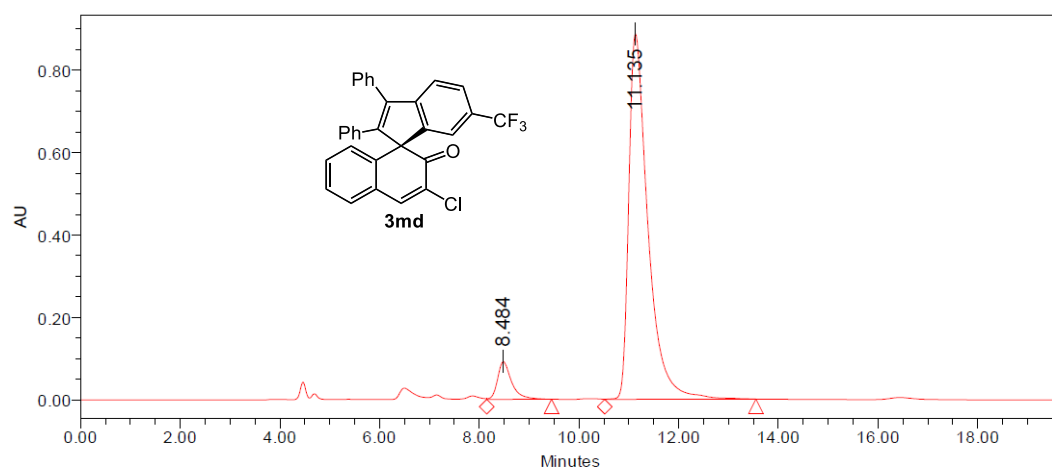

#### Peak Results

|   | Name | RT     | Area     | Height | % Area |
|---|------|--------|----------|--------|--------|
| 1 |      | 8.484  | 1778448  | 91213  | 6.99   |
| 2 |      | 11.135 | 23671160 | 886780 | 93.01  |

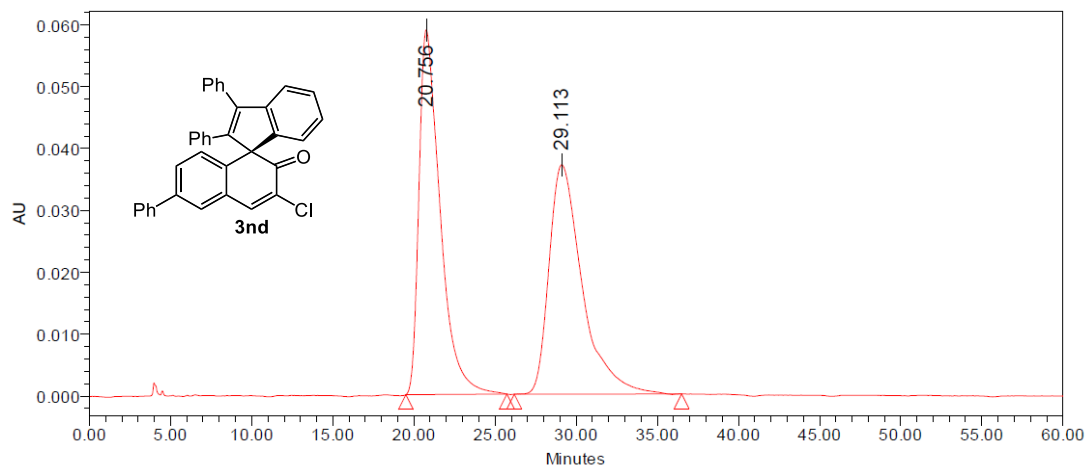

**Peak Results**

|   | Name | RT     | Area    | Height | % Area |
|---|------|--------|---------|--------|--------|
| 1 |      | 20.756 | 5338067 | 58919  | 50.32  |
| 2 |      | 29.113 | 5270757 | 37059  | 49.68  |

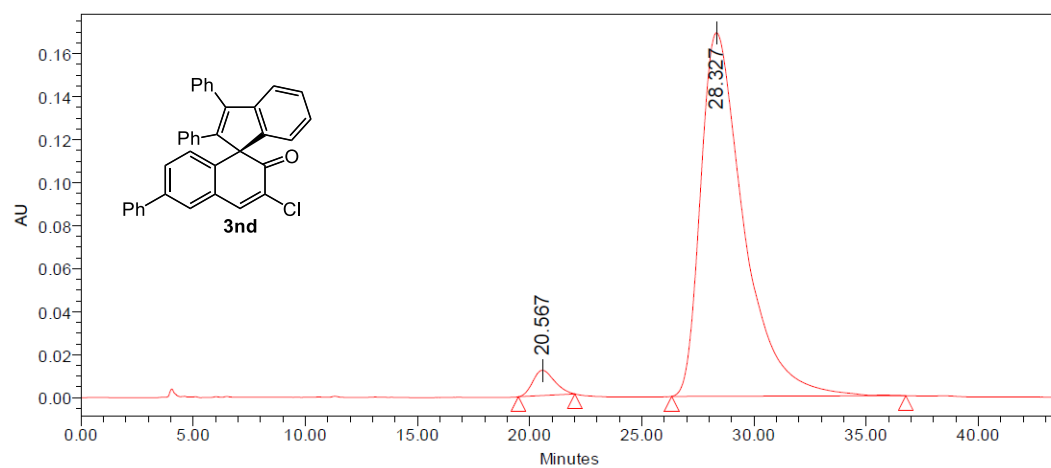

**Peak Results**

|   | Name | RT     | Area     | Height | % Area |
|---|------|--------|----------|--------|--------|
| 1 |      | 20.567 | 794446   | 11748  | 3.39   |
| 2 |      | 28.327 | 22619814 | 169043 | 96.61  |

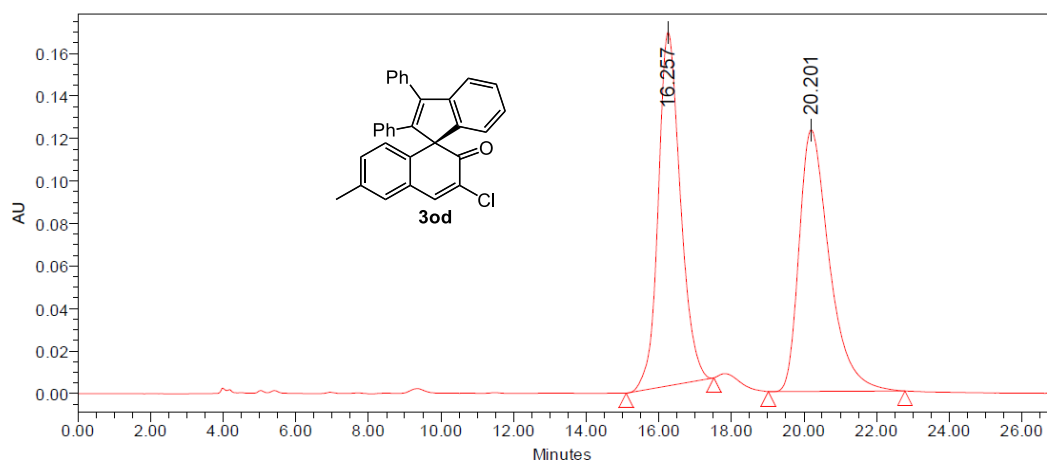

**Peak Results**

|   | Name | RT     | Area    | Height | % Area |
|---|------|--------|---------|--------|--------|
| 1 |      | 16.257 | 7056968 | 166302 | 49.76  |
| 2 |      | 20.201 | 7124065 | 122984 | 50.24  |

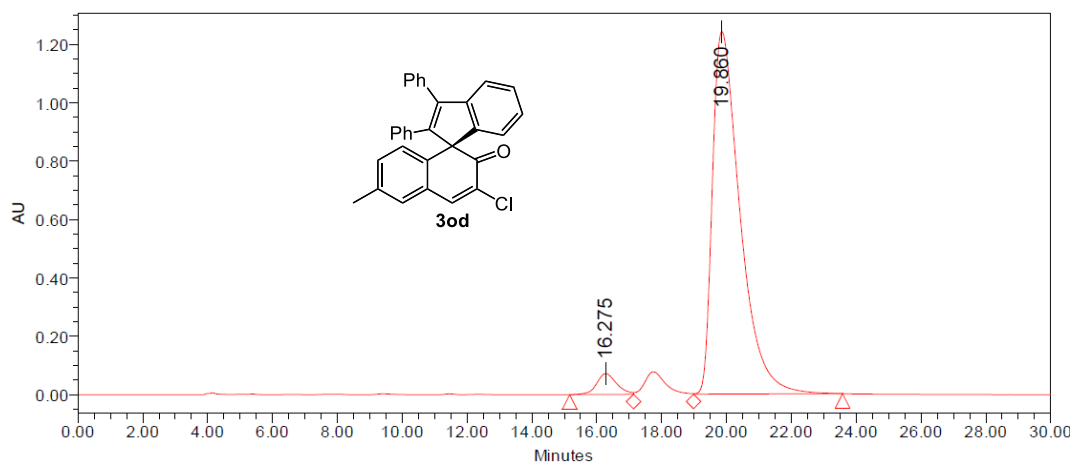

**Peak Results**

|   | Name | RT     | Area     | Height  | % Area |
|---|------|--------|----------|---------|--------|
| 1 |      | 16.275 | 3057735  | 71402   | 3.99   |
| 2 |      | 19.860 | 73481571 | 1241445 | 96.01  |

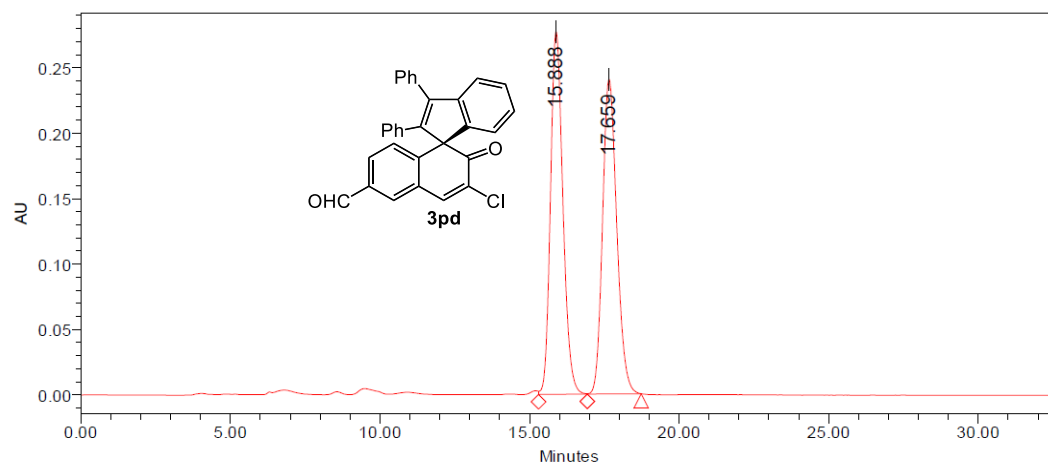

#### Peak Results

|   | Name | RT     | Area    | Height | % Area |
|---|------|--------|---------|--------|--------|
| 1 |      | 15.888 | 7996752 | 277258 | 50.23  |
| 2 |      | 17.659 | 7921962 | 240487 | 49.77  |

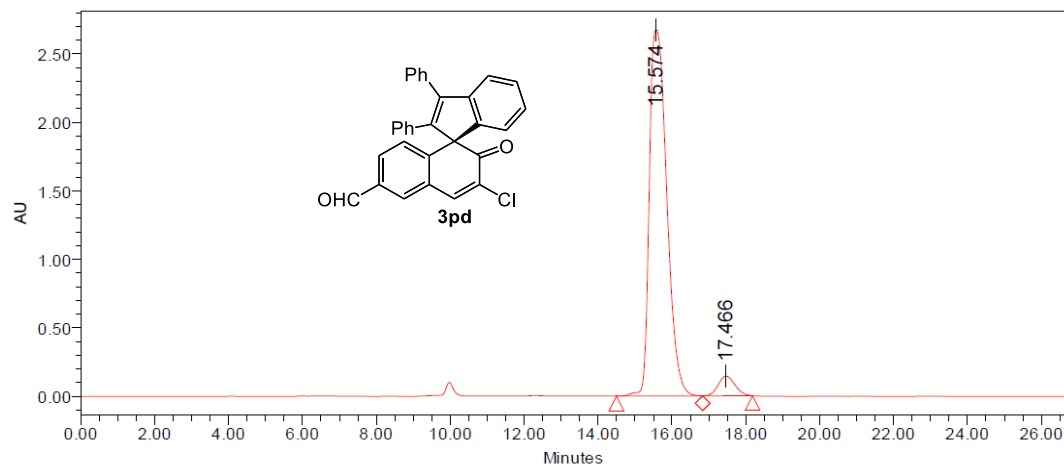

#### Peak Results

|   | Name | RT     | Area     | Height  | % Area |
|---|------|--------|----------|---------|--------|
| 1 |      | 15.574 | 87542380 | 2673266 | 95.08  |
| 2 |      | 17.466 | 4533561  | 143287  | 4.92   |

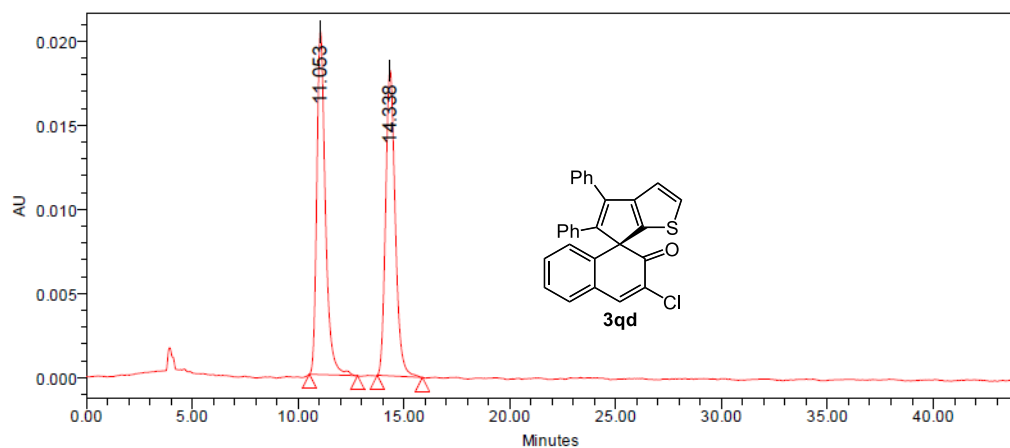

#### Peak Results

|   | Name | RT     | Area   | Height | % Area |
|---|------|--------|--------|--------|--------|
| 1 |      | 11.053 | 576251 | 20410  | 50.05  |
| 2 |      | 14.338 | 575202 | 18176  | 49.95  |

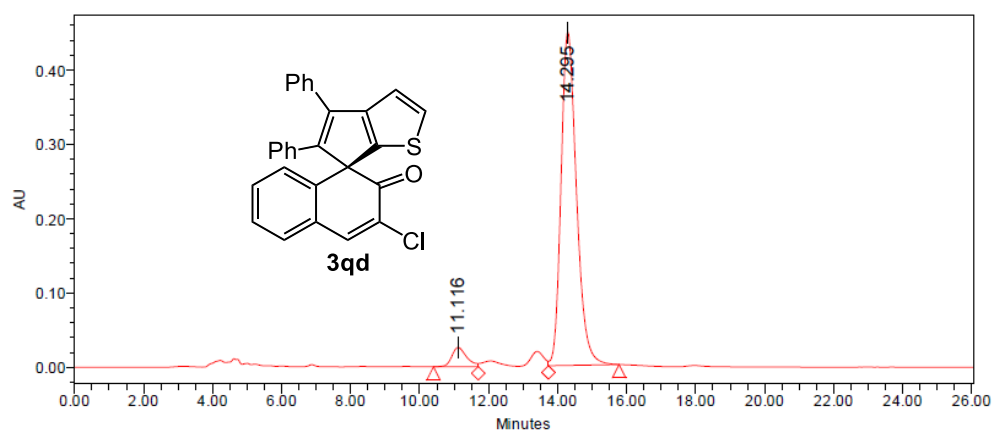

#### Peak Results

|   | Name | RT     | Area     | Height | % Area |
|---|------|--------|----------|--------|--------|
| 1 |      | 11.116 | 770040   | 25951  | 5.23   |
| 2 |      | 14.295 | 13959245 | 448308 | 94.77  |

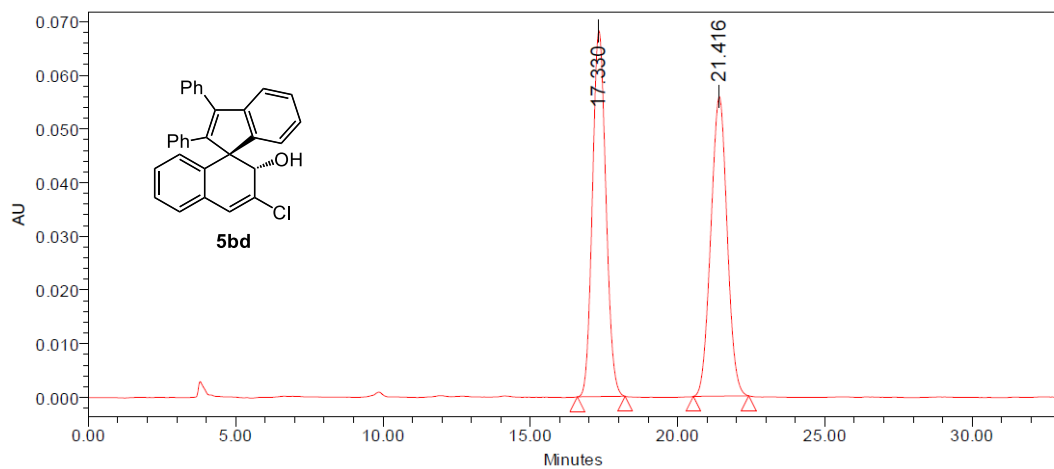

**Peak Results**

|   | Name | RT     | Area    | Height | % Area |
|---|------|--------|---------|--------|--------|
| 1 |      | 17.330 | 2168853 | 68151  | 50.23  |
| 2 |      | 21.416 | 2149130 | 55805  | 49.77  |

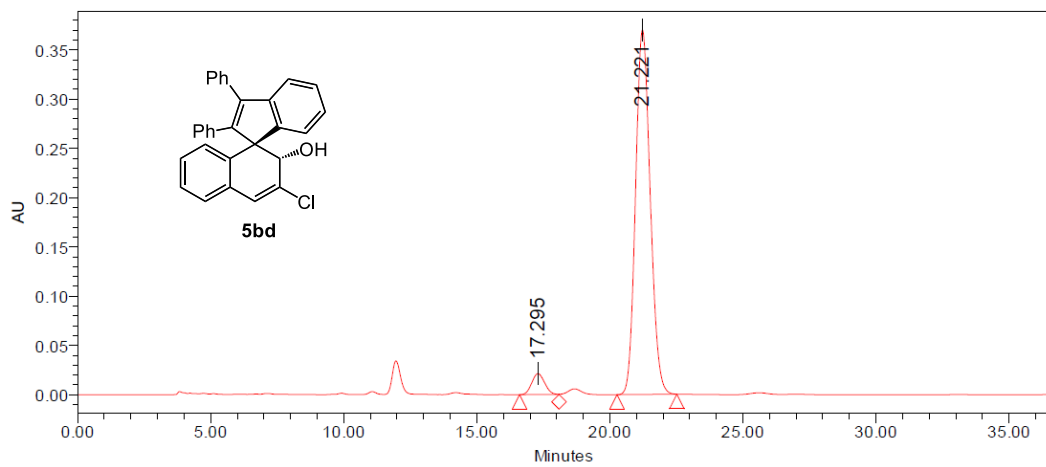

**Peak Results**

|   | Name | RT     | Area     | Height | % Area |
|---|------|--------|----------|--------|--------|
| 1 |      | 17.295 | 715406   | 21241  | 4.80   |
| 2 |      | 21.221 | 14195999 | 370198 | 95.20  |

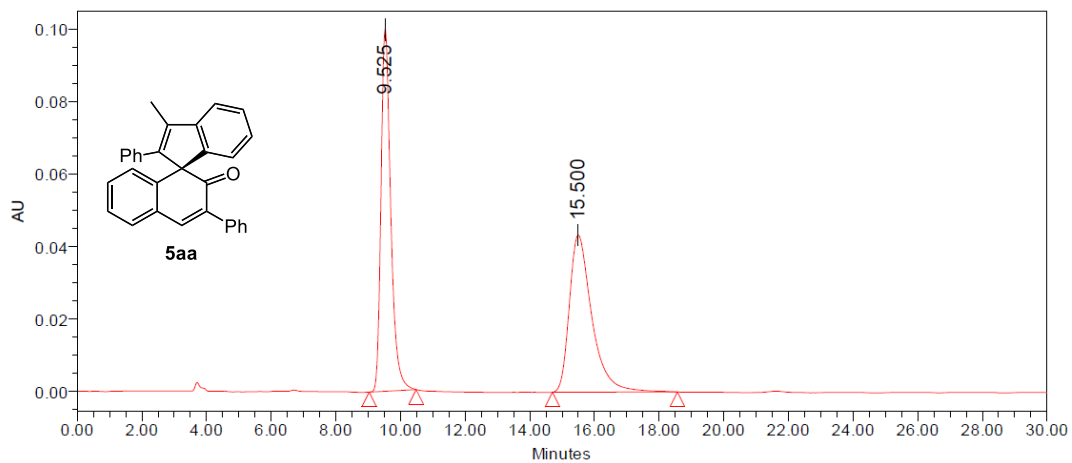

**Peak Results**

|   | Name | RT     | Area    | Height | % Area |
|---|------|--------|---------|--------|--------|
| 1 |      | 9.525  | 2089251 | 100023 | 49.90  |
| 2 |      | 15.500 | 2097559 | 43362  | 50.10  |

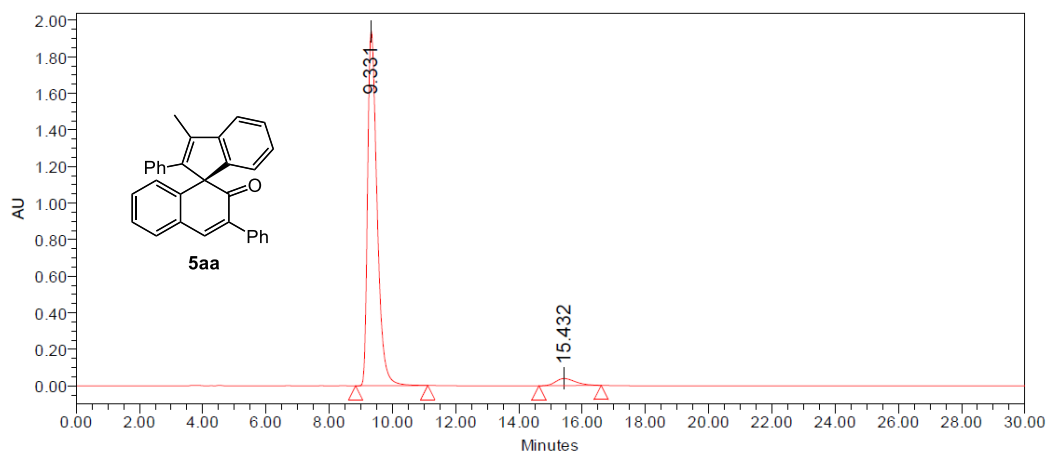

**Peak Results**

|   | Name | RT     | Area     | Height  | % Area |
|---|------|--------|----------|---------|--------|
| 1 |      | 9.331  | 40270830 | 1939539 | 95.93  |
| 2 |      | 15.432 | 1707999  | 38747   | 4.07   |



# Copies of HSQC, COSY, 1D-NOESY of 5bb

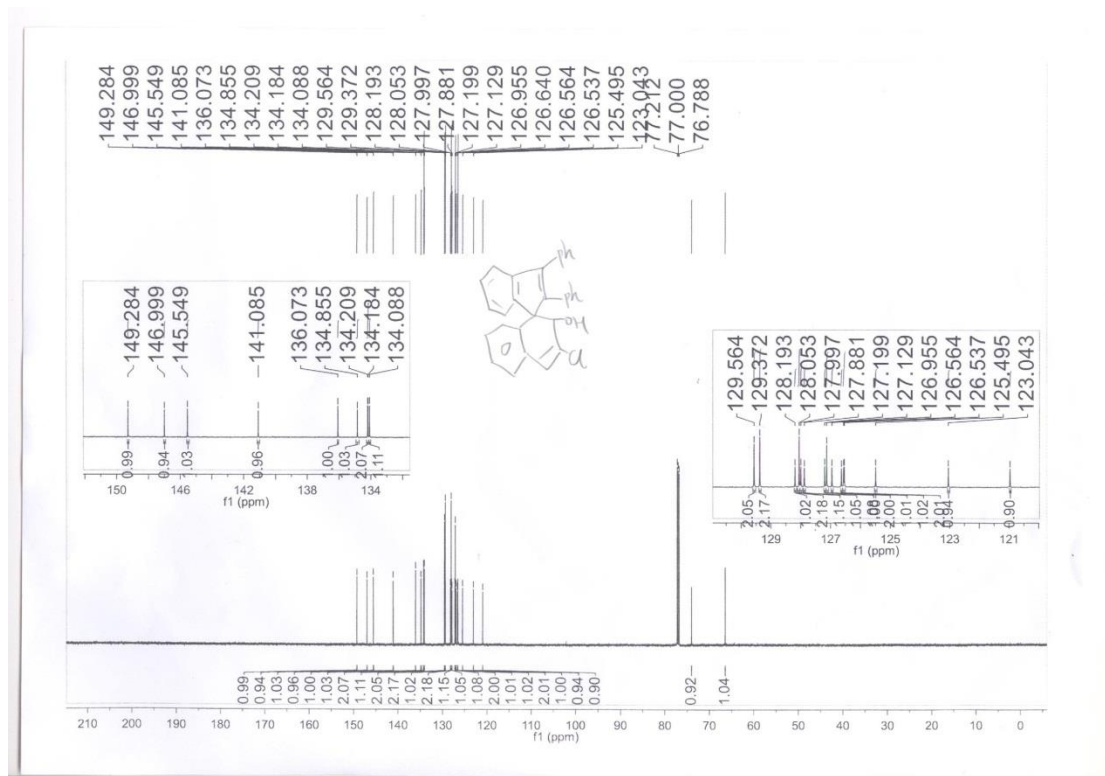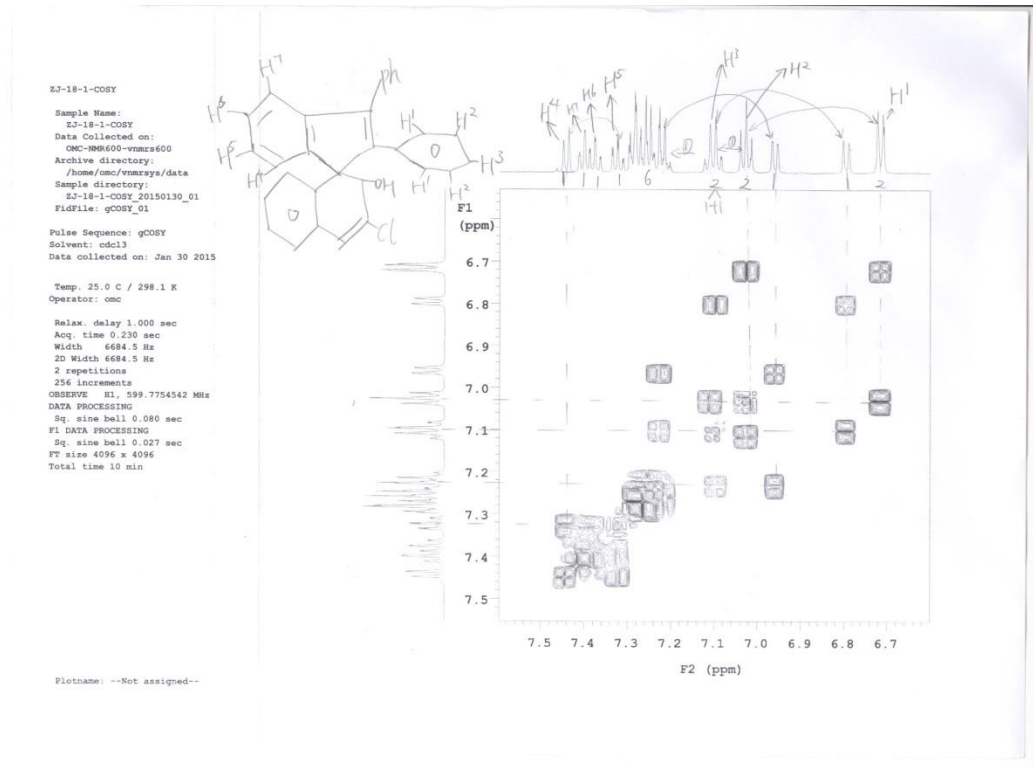

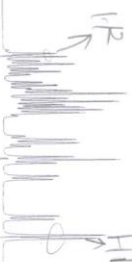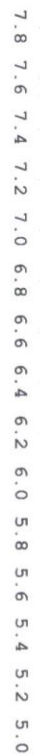

Fe2 (ppm)

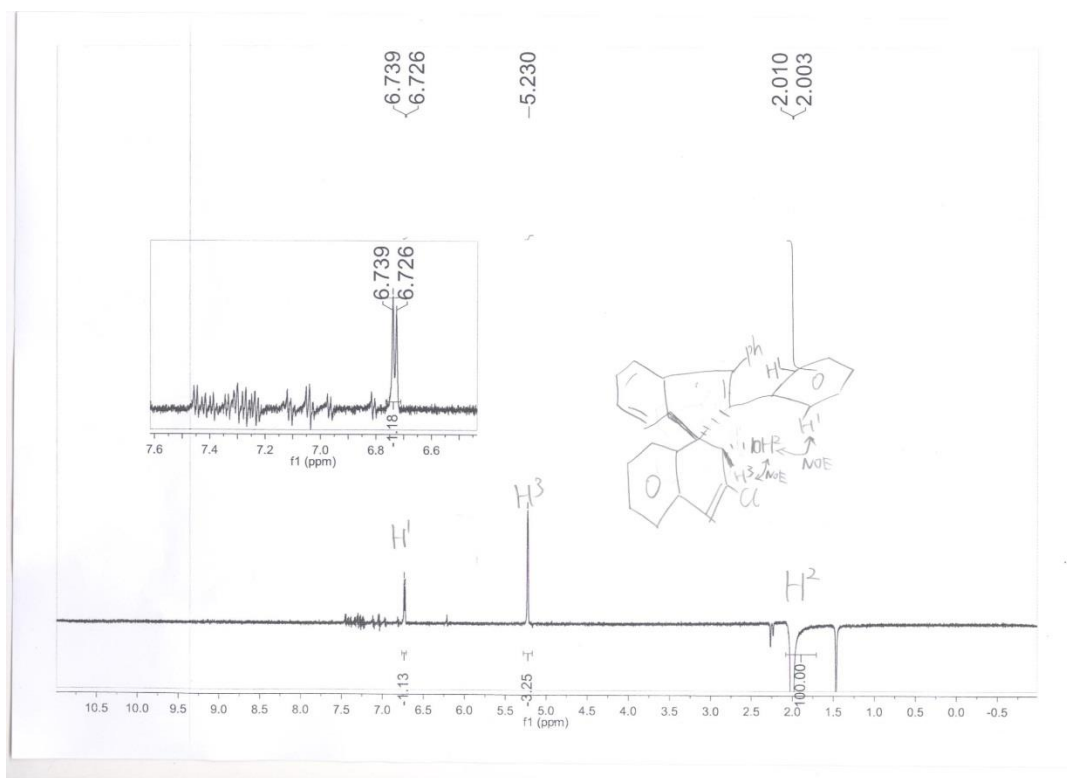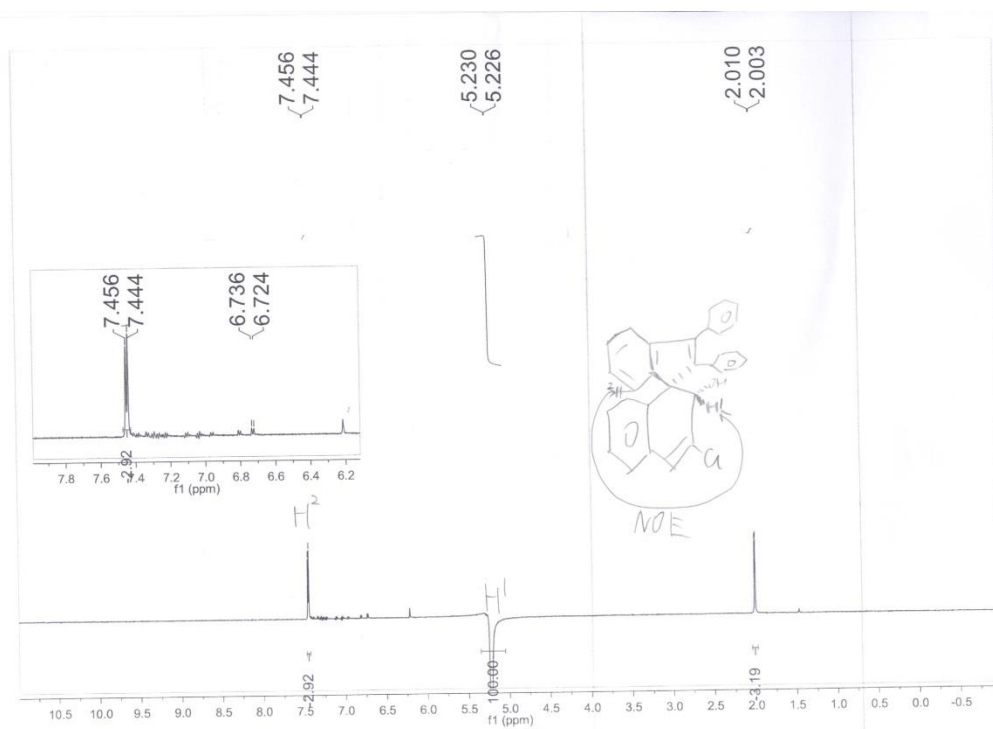

Supplement: Supplementary file 1 [file 3808180]
